# Supplementary material
Source: publisher figshare collection journal article supplement (https://acs.figshare.com/ndownloader/files/5517479)
Supplement: Supplementary file 1 [file 5517479]

 
data_shelx
 
_audit_creation_method            'SHELXL-2014/7'
_shelx_SHELXL_version_number      '2014/7'
_chemical_name_systematic         ?
_chemical_name_common             ?
_chemical_melting_point           ?
_chemical_formula_moiety          
'Ni Nb (C4 H4 N2)2 O1 F5, 0.84(C O2)'
_chemical_formula_sum
 'C8.84 H8 F5 N4 Nb Ni O2.68' 
_chemical_formula_weight          459.74

loop_
 _atom_type_symbol
 _atom_type_description
 _atom_type_scat_dispersion_real
 _atom_type_scat_dispersion_imag
 _atom_type_scat_source
 'C'  'C'   0.0181   0.0091
 'International Tables Vol C Tables 4.2.6.8 and 6.1.1.4'
 'H'  'H'   0.0000   0.0000
 'International Tables Vol C Tables 4.2.6.8 and 6.1.1.4'
 'F'  'F'   0.0727   0.0534
 'International Tables Vol C Tables 4.2.6.8 and 6.1.1.4'
 'N'  'N'   0.0311   0.0180
 'International Tables Vol C Tables 4.2.6.8 and 6.1.1.4'
 'Nb'  'Nb'  -0.1121   2.4826
 'International Tables Vol C Tables 4.2.6.8 and 6.1.1.4'
 'Ni'  'Ni'  -3.0029   0.5091
 'International Tables Vol C Tables 4.2.6.8 and 6.1.1.4'
 'O'  'O'   0.0492   0.0322
 'International Tables Vol C Tables 4.2.6.8 and 6.1.1.4'
 
_space_group_crystal_system       tetragonal
_space_group_IT_number            140
_space_group_name_H-M_alt         'I 4/m c m'
_space_group_name_Hall            '-I 4 2c'
 
_shelx_space_group_comment
;
The symmetry employed for this shelxl refinement is uniquely defined
by the following loop, which should always be used as a source of
symmetry information in preference to the above space-group names.
They are only intended as comments.
;
 
loop_
 _space_group_symop_operation_xyz
 'x, y, z'
 '-y, x, z'
 '-x, -y, z'
 'y, -x, z'
 'x, -y, -z+1/2'
 '-x, y, -z+1/2'
 'y, x, -z+1/2'
 '-y, -x, -z+1/2'
 'x+1/2, y+1/2, z+1/2'
 '-y+1/2, x+1/2, z+1/2'
 '-x+1/2, -y+1/2, z+1/2'
 'y+1/2, -x+1/2, z+1/2'
 'x+1/2, -y+1/2, -z+1'
 '-x+1/2, y+1/2, -z+1'
 'y+1/2, x+1/2, -z+1'
 '-y+1/2, -x+1/2, -z+1'
 '-x, -y, -z'
 'y, -x, -z'
 'x, y, -z'
 '-y, x, -z'
 '-x, y, z-1/2'
 'x, -y, z-1/2'
 '-y, -x, z-1/2'
 'y, x, z-1/2'
 '-x+1/2, -y+1/2, -z+1/2'
 'y+1/2, -x+1/2, -z+1/2'
 'x+1/2, y+1/2, -z+1/2'
 '-y+1/2, x+1/2, -z+1/2'
 '-x+1/2, y+1/2, z'
 'x+1/2, -y+1/2, z'
 '-y+1/2, -x+1/2, z'
 'y+1/2, x+1/2, z'
 
_cell_length_a                    9.903(1)
_cell_length_b                    9.903(1)
_cell_length_c                    15.720(2)
_cell_angle_alpha                 90
_cell_angle_beta                  90
_cell_angle_gamma                 90
_cell_volume                      1541.6(4)
_cell_formula_units_Z             4
_cell_measurement_temperature     296(1)
_cell_measurement_reflns_used     2057
_cell_measurement_theta_min       5.63
_cell_measurement_theta_max       65.95

_exptl_crystal_description        'prism'
_exptl_crystal_colour             'light blue'
_exptl_crystal_density_meas       ?
_exptl_crystal_density_method     ?
_exptl_crystal_density_diffrn     1.981          
_exptl_crystal_F_000              898
_exptl_transmission_factor_min    ?
_exptl_transmission_factor_max    ?
_exptl_crystal_size_max           0.030
_exptl_crystal_size_mid           0.020
_exptl_crystal_size_min           0.010
_exptl_absorpt_coefficient_mu     8.266
_shelx_estimated_absorpt_T_min    0.790
_shelx_estimated_absorpt_T_max    0.922
_exptl_absorpt_correction_type    'multi-scan'
_exptl_absorpt_correction_T_min   0.3502
_exptl_absorpt_correction_T_max   0.5843
_exptl_absorpt_process_details    
;
SADABS-2008/1 (Bruker,2008) was used for absorption correction.
wR2(int) was 0.1756 before and 0.0767 after correction.
The Ratio of minimum to maximum transmission is 0.5993.
The \l/2 correction factor is 0.00150.
;

_diffrn_ambient_temperature       296(1)
_diffrn_radiation_wavelength      1.54178
_diffrn_radiation_type            CuK\a
_diffrn_source                    'Incoatec I\ms'
_diffrn_measurement_device_type   'Bruker X8 PROSPECTOR APEX2 CCD'
_diffrn_measurement_method        '\f and \w scans'
_diffrn_radiation_monochromator   'mirrors'
_diffrn_detector_area_resol_mean  8.3
_diffrn_reflns_number             13098
_diffrn_reflns_av_unetI/netI      0.0543
_diffrn_reflns_av_R_equivalents   0.0704
_diffrn_reflns_limit_h_min        -11
_diffrn_reflns_limit_h_max        11
_diffrn_reflns_limit_k_min        -11
_diffrn_reflns_limit_k_max        11
_diffrn_reflns_limit_l_min        -18
_diffrn_reflns_limit_l_max        18
_diffrn_reflns_theta_min          5.629
_diffrn_reflns_theta_max          66.934
_diffrn_reflns_theta_full         66.934
_diffrn_measured_fraction_theta_max   0.990
_diffrn_measured_fraction_theta_full  0.990
_diffrn_reflns_Laue_measured_fraction_max    0.990
_diffrn_reflns_Laue_measured_fraction_full   0.990
_diffrn_reflns_point_group_measured_fraction_max   0.990
_diffrn_reflns_point_group_measured_fraction_full  0.990
_reflns_number_total              392
_reflns_number_gt                 295
_reflns_threshold_expression      'I > 2\s(I)'
_reflns_Friedel_coverage          0.000
_reflns_Friedel_fraction_max      .
_reflns_Friedel_fraction_full     .
 
_reflns_special_details
;
 Reflections were merged by SHELXL according to the crystal
 class for the calculation of statistics and refinement.
 
 _reflns_Friedel_fraction is defined as the number of unique
 Friedel pairs measured divided by the number that would be
 possible theoretically, ignoring centric projections and
 systematic absences.
;
 
_computing_data_collection        
'Bruker APEX2 v2009.3-0 (Bruker AXS Inc., 2009)'
_computing_cell_refinement        'SAINT v8.34A (Bruker, 2013)'
_computing_data_reduction         'SAINT v8.34A (Bruker, 2013)'
_computing_structure_solution     'ShelXS (Sheldrick, 2008)'
_computing_structure_refinement   'SHELXL-2014/7 (Sheldrick, 2014)'
_computing_molecular_graphics     'DIAMOND (Crystal Impact GbR, 2009'
_computing_publication_material   
'PublCIF. Westrip, S. P. (2010). J. Appl. Cryst. 43, 920-925.'

_refine_special_details           
;
 A full list of restraints and constraints is contained
 within the CIF file. Crystal was placed in a capillary during
 the data collection and all the problems with the data were
 probably caused by unavoidable errors in absorption correction.
 Thermal parameters of N and C atoms of a pyrazine ring
 were restrained to be similar and geometry of the pyrazine
 ring was restrained to be reasonable.
 Atoms O1 and F1 occupy the same space so their coordinates and
 thermal parameters were constrained to be the same. 
; 

_refine_ls_structure_factor_coef  Fsqd
_refine_ls_matrix_type            full
_refine_ls_weighting_scheme       calc
_refine_ls_weighting_details
'w=1/[\s^2^(Fo^2^)+(0.0906P)^2^+19.1958P] where P=(Fo^2^+2Fc^2^)/3'
_atom_sites_solution_primary      direct
_atom_sites_solution_secondary    difmap
_atom_sites_solution_hydrogens    geom
_refine_ls_hydrogen_treatment     constr
_refine_ls_extinction_method      none
_refine_ls_extinction_coef        .
_refine_ls_number_reflns          392
_refine_ls_number_parameters      40
_refine_ls_number_restraints      13
_refine_ls_R_factor_all           0.0784
_refine_ls_R_factor_gt            0.0712
_refine_ls_wR_factor_ref          0.1889
_refine_ls_wR_factor_gt           0.1836
_refine_ls_goodness_of_fit_ref    1.039
_refine_ls_restrained_S_all       1.020
_refine_ls_shift/su_max           0.000
_refine_ls_shift/su_mean          0.000
 
loop_
 _atom_site_label
 _atom_site_type_symbol
 _atom_site_fract_x
 _atom_site_fract_y
 _atom_site_fract_z
 _atom_site_U_iso_or_equiv
 _atom_site_adp_type
 _atom_site_occupancy
 _atom_site_site_symmetry_order  
 _atom_site_calc_flag
 _atom_site_refinement_flags_posn
 _atom_site_refinement_flags_adp
 _atom_site_refinement_flags_occupancy
 _atom_site_disorder_assembly
 _atom_site_disorder_group
Nb1 Nb 0.5000 0.0000 0.0000 0.0558(8) Uani 1 8 d S T P . .
Ni1 Ni 0.5000 0.0000 0.2500 0.0408(9) Uani 1 8 d S T P . .
O1 O 0.5000 0.0000 0.1228(4) 0.049(2) Uani 0.5 4 d S T P . .
F1 F 0.5000 0.0000 0.1228(4) 0.049(2) Uani 0.5 4 d S T P . .
F2 F 0.6922(8) 0.0096(8) 0.0000 0.094(3) Uani 1 2 d S T P . .
N1 N 0.6506(6) 0.1506(6) 0.2501(4) 0.0468(16) Uani 1 2 d DS TU P . .
C1 C 0.7409(11) 0.1612(12) 0.1875(6) 0.053(2) Uani 0.5 1 d D U P . .
H1 H 0.7369 0.1001 0.1426 0.064 Uiso 0.5 1 calc R U P . .
C2 C 0.6593(13) 0.2399(11) 0.3134(6) 0.053(2) Uani 0.5 1 d D U P . .
H2 H 0.5983 0.2361 0.3583 0.064 Uiso 0.5 1 calc R U P . .
O1G O 1.0000 0.0000 0.0741(13) 0.140(12) Uani 0.84(4) 4 d S T P . .
C1G C 1.0000 0.0000 0.0000 0.108(14) Uani 0.84(4) 8 d S T P . .
 
loop_
 _atom_site_aniso_label
 _atom_site_aniso_U_11
 _atom_site_aniso_U_22
 _atom_site_aniso_U_33
 _atom_site_aniso_U_23
 _atom_site_aniso_U_13
 _atom_site_aniso_U_12
Nb1 0.0565(9) 0.0565(9) 0.0544(11) 0.000 0.000 0.0026(7)
Ni1 0.0475(12) 0.0475(12) 0.0274(14) 0.000 0.000 0.000
O1 0.056(3) 0.056(3) 0.036(4) 0.000 0.000 -0.002(3)
F1 0.056(3) 0.056(3) 0.036(4) 0.000 0.000 -0.002(3)
F2 0.061(4) 0.170(9) 0.052(3) 0.000 0.000 -0.022(4)
N1 0.052(2) 0.052(2) 0.037(2) -0.0016(16) -0.0016(16) -0.001(3)
C1 0.060(3) 0.059(3) 0.041(2) -0.008(2) 0.005(2) -0.008(3)
C2 0.060(3) 0.059(3) 0.041(2) -0.008(2) 0.005(2) -0.008(3)
O1G 0.172(19) 0.172(19) 0.076(13) 0.000 0.000 0.000
C1G 0.10(2) 0.10(2) 0.12(4) 0.000 0.000 0.000
 
_geom_special_details
;
 All esds (except the esd in the dihedral angle between two l.s. planes)
 are estimated using the full covariance matrix.  The cell esds are taken
 into account individually in the estimation of esds in distances, angles
 and torsion angles; correlations between esds in cell parameters are only
 used when they are defined by crystal symmetry.  An approximate (isotropic)
 treatment of cell esds is used for estimating esds involving l.s. planes.
;
 
loop_
 _geom_bond_atom_site_label_1
 _geom_bond_atom_site_label_2
 _geom_bond_distance
 _geom_bond_site_symmetry_2
 _geom_bond_publ_flag
Nb1 F2 1.905(8) 17_655 ?
Nb1 F2 1.905(8) 31 ?
Nb1 F2 1.905(8) 15_544 ?
Nb1 F2 1.905(8) . ?
Nb1 O1 1.931(6) 17_655 ?
Nb1 F1 1.931(6) 17_655 ?
Nb1 O1 1.931(6) . ?
Ni1 O1 1.999(6) . ?
Ni1 F1 1.999(6) 26 ?
Ni1 O1 1.999(6) 26 ?
Ni1 N1 2.110(9) . ?
Ni1 N1 2.110(9) 3_655 ?
Ni1 N1 2.110(9) 28_545 ?
Ni1 N1 2.110(9) 26 ?
N1 C1 1.333(10) 32_545 ?
N1 C1 1.333(10) . ?
N1 C2 1.333(10) 32_545 ?
N1 C2 1.333(10) . ?
C1 C2 1.39(2) 25_655 ?
C1 C2 1.79(2) 8_665 ?
C1 C2 1.979(15) 32_545 ?
C1 H1 0.9300 . ?
C2 C1 1.39(2) 25_655 ?
C2 H2 0.9300 . ?
O1G C1G 1.17(2) . ?
C1G O1G 1.17(2) 17_755 ?
 
loop_
 _geom_angle_atom_site_label_1
 _geom_angle_atom_site_label_2
 _geom_angle_atom_site_label_3
 _geom_angle
 _geom_angle_site_symmetry_1
 _geom_angle_site_symmetry_3
 _geom_angle_publ_flag
F2 Nb1 F2 84.3(5) 17_655 31 ?
F2 Nb1 F2 95.7(5) 17_655 15_544 ?
F2 Nb1 F2 180.0(5) 31 15_544 ?
F2 Nb1 F2 180.0 17_655 . ?
F2 Nb1 F2 95.7(5) 31 . ?
F2 Nb1 F2 84.3(5) 15_544 . ?
F2 Nb1 O1 90.0 17_655 17_655 ?
F2 Nb1 O1 90.0 31 17_655 ?
F2 Nb1 O1 90.0 15_544 17_655 ?
F2 Nb1 O1 90.0 . 17_655 ?
F2 Nb1 F1 90.0 17_655 17_655 ?
F2 Nb1 F1 90.0 31 17_655 ?
F2 Nb1 F1 90.0 15_544 17_655 ?
F2 Nb1 F1 90.0 . 17_655 ?
O1 Nb1 F1 0.0 17_655 17_655 ?
F2 Nb1 O1 90.0 17_655 . ?
F2 Nb1 O1 90.0 31 . ?
F2 Nb1 O1 90.0 15_544 . ?
F2 Nb1 O1 90.0 . . ?
O1 Nb1 O1 180.0 17_655 . ?
F1 Nb1 O1 180.0 17_655 . ?
O1 Ni1 F1 180.0 . 26 ?
O1 Ni1 O1 180.0 . 26 ?
F1 Ni1 O1 0.0 26 26 ?
O1 Ni1 N1 90.04(17) . . ?
F1 Ni1 N1 89.96(17) 26 . ?
O1 Ni1 N1 89.96(17) 26 . ?
O1 Ni1 N1 90.04(17) . 3_655 ?
F1 Ni1 N1 89.96(17) 26 3_655 ?
O1 Ni1 N1 89.96(17) 26 3_655 ?
N1 Ni1 N1 179.9(4) . 3_655 ?
O1 Ni1 N1 89.96(17) . 28_545 ?
F1 Ni1 N1 90.04(16) 26 28_545 ?
O1 Ni1 N1 90.04(16) 26 28_545 ?
N1 Ni1 N1 90.0 . 28_545 ?
N1 Ni1 N1 90.000(1) 3_655 28_545 ?
O1 Ni1 N1 89.96(16) . 26 ?
F1 Ni1 N1 90.04(16) 26 26 ?
O1 Ni1 N1 90.04(16) 26 26 ?
N1 Ni1 N1 90.000(1) . 26 ?
N1 Ni1 N1 90.000(1) 3_655 26 ?
N1 Ni1 N1 179.9(3) 28_545 26 ?
Nb1 O1 Ni1 180.0 . . ?
C1 N1 C1 49.5(9) 32_545 . ?
C1 N1 C2 117.1(10) 32_545 32_545 ?
C1 N1 C2 95.8(9) . 32_545 ?
C1 N1 C2 95.8(9) 32_545 . ?
C1 N1 C2 117.1(10) . . ?
C2 N1 C2 50.1(9) 32_545 . ?
C1 N1 Ni1 121.9(7) 32_545 . ?
C1 N1 Ni1 121.9(7) . . ?
C2 N1 Ni1 121.0(7) 32_545 . ?
C2 N1 Ni1 121.0(7) . . ?
N1 C1 C2 122.6(9) . 25_655 ?
N1 C1 C2 98.9(9) . 8_665 ?
C2 C1 C2 39.2(7) 25_655 8_665 ?
N1 C1 C2 42.1(5) . 32_545 ?
C2 C1 C2 91.1(8) 25_655 32_545 ?
C2 C1 C2 91.0(7) 8_665 32_545 ?
N1 C1 H1 118.7 . . ?
C2 C1 H1 118.7 25_655 . ?
C2 C1 H1 130.2 8_665 . ?
C2 C1 H1 138.7 32_545 . ?
N1 C2 C1 120.3(9) . 25_655 ?
N1 C2 H2 119.8 . . ?
C1 C2 H2 119.8 25_655 . ?
O1G C1G O1G 180.0 . 17_755 ?
 
loop_
 _geom_torsion_atom_site_label_1
 _geom_torsion_atom_site_label_2
 _geom_torsion_atom_site_label_3
 _geom_torsion_atom_site_label_4
 _geom_torsion
 _geom_torsion_site_symmetry_1
 _geom_torsion_site_symmetry_2
 _geom_torsion_site_symmetry_3
 _geom_torsion_site_symmetry_4
 _geom_torsion_publ_flag
C1 N1 C1 C2 73.3(4) 32_545 . . 25_655 ?
C2 N1 C1 C2 -47.8(8) 32_545 . . 25_655 ?
C2 N1 C1 C2 -0.01(19) . . . 25_655 ?
Ni1 N1 C1 C2 179.9(3) . . . 25_655 ?
C1 N1 C1 C2 39.5(8) 32_545 . . 8_665 ?
C2 N1 C1 C2 -81.5(9) 32_545 . . 8_665 ?
C2 N1 C1 C2 -33.8(5) . . . 8_665 ?
Ni1 N1 C1 C2 146.2(5) . . . 8_665 ?
C1 N1 C1 C2 121.0(7) 32_545 . . 32_545 ?
C2 N1 C1 C2 47.8(8) . . . 32_545 ?
Ni1 N1 C1 C2 -132.3(8) . . . 32_545 ?
C1 N1 C2 C1 -47.0(8) 32_545 . . 25_655 ?
C1 N1 C2 C1 0.01(18) . . . 25_655 ?
C2 N1 C2 C1 73.8(4) 32_545 . . 25_655 ?
Ni1 N1 C2 C1 -179.9(3) . . . 25_655 ?
 
_refine_diff_density_max    1.444
_refine_diff_density_min   -0.510
_refine_diff_density_rms    0.201


# start Validation Reply Form
_vrf_PLAT077_shelx
;
PROBLEM: Unitcell contains non-integer number of atoms ..     Please Check
RESPONSE: From sorption isotherm at 1 atm we can get maximum 88.7 mol.%
 of CO2 in our material. In the crystal structure we found occupancy of
 CO2 molecule 84(4)%
;
_vrf_PLAT088_shelx
;
PROBLEM: Poor Data / Parameter Ratio ....................       9.80 Note  
RESPONSE: The data were collected up to 0.84 A-1, the maximum possible
 resolution for Cu radiation.
;
_vrf_PLAT906_shelx
;
PROBLEM: Large K value in the Analysis of Variance ......      5.270 Check 
RESPONSE: The crystal was collected in a capillary. The capillary caused
 an unavoidable errors in absorption correction, deviances in intensity
 of equivalents etc.
;
_vrf_PLAT094_shelx
;
PROBLEM: Ratio of Maximum / Minimum Residual Density ....       2.83 Report
RESPONSE: The highest peak of 1.44 e A-3 is located 1.03A from Nb atom,
 the heaviest atom in the structure.
;
_vrf_PLAT911_shelx
;
PROBLEM: Missing # FCF Refl Between THmin & STh/L=  0.597          4 Report
RESPONSE: These reflexes were probably omitted by the integration
 software due to wrong background estimation.
;
# end Validation Reply Form


_shelx_res_file
;

    shelx.res created by SHELXL-2014/7

TITL NiNbOF5Pyrazine2_CO2_capillary_RT in I4/mcm #140
CELL  1.54178   9.9028   9.9028  15.7198   90.000   90.000   90.000
ZERR     4.00   0.0012   0.0012   0.0022    0.000    0.000    0.000
LATT   2
SYMM  - Y,   X,   Z
SYMM  - X, - Y,   Z
SYMM    Y, - X,   Z
SYMM    X, - Y, 1/2 - Z
SYMM  - X,   Y, 1/2 - Z
SYMM    Y,   X, 1/2 - Z
SYMM  - Y, - X, 1/2 - Z
SFAC  C    H    F    N    NB   NI   O
UNIT  35.35 32 20 16 4 4 10.72
MERG   2
OMIT     0.00 180.00
EQIV $1 1.5-X,0.5-Y,0.5-Z
EQIV $2 0.5+Y,-0.5+X,+Z
EQIV $3 1-Y,1-X,0.5-Z
SADI 0.001 N1 C1 N1 C2
FLAT 0.01 N1 C2 C1_$1 N1_$1 C2_$1 C1
RIGU 0.001 0.001 C1 N1 C2
EADP O1 F1
EADP C1 C2
EXYZ O1 F1
FREE C1 C1_$2
FREE C2 C2_$2
FREE C2 C1_$3
FREE C2 C1_$2
MORE -1
FMAP   2   53   53
SIZE 0.01 0.02 0.03
PLAN   10
ACTA
BOND   $H
CONF
LIST   4
L.S.  3
TEMP    23.00
WGHT    0.090600   19.195799
FVAR       0.26397   0.84472
NB1   5    0.500000    0.000000    0.000000    10.12500    0.05654    0.05654 =
         0.05440    0.00000    0.00000    0.00264
NI1   6    0.500000    0.000000    0.250000    10.12500    0.04749    0.04749 =
         0.02742    0.00000    0.00000    0.00000
O1    7    0.500000    0.000000    0.122826    10.12500    0.05605    0.05605 =
         0.03637    0.00000    0.00000   -0.00232
F1    3    0.500000    0.000000    0.122826    10.12500    0.05605    0.05605 =
         0.03637    0.00000    0.00000   -0.00232
F2    3    0.692178    0.009624    0.000000    10.50000    0.06059    0.17035 =
         0.05220    0.00000    0.00000   -0.02197
N1    4    0.650646    0.150646    0.250101    10.50000    0.05184    0.05184 =
         0.03678   -0.00163   -0.00163   -0.00058
C1    1    0.740861    0.161205    0.187484    10.50000    0.05986    0.05897 =
         0.04150   -0.00772    0.00462   -0.00832
AFIX  43
H1    2    0.736908    0.100096    0.142630    10.50000   -1.20000
AFIX   0
C2    1    0.659305    0.239914    0.313373    10.50000    0.05986    0.05897 =
         0.04150   -0.00772    0.00462   -0.00832
AFIX  43
H2    2    0.598320    0.236069    0.358298    10.50000   -1.20000
AFIX   0
O1G   7    1.000000    0.000000    0.074126    20.25000    0.17217    0.17217 =
         0.07630    0.00000    0.00000    0.00000
C1G   1    1.000000    0.000000    0.000000    20.12500    0.10410    0.10410 =
         0.11509    0.00000    0.00000    0.00000
HKLF    4

REM  NiNbOF5Pyrazine2_CO2_capillary_RT in I4/mcm #140
REM R1 =  0.0712 for     295 Fo > 4sig(Fo)  and  0.0784 for all     392 data
REM     40 parameters refined using     13 restraints

END

WGHT      0.0921      8.8012

REM Highest difference peak  1.444,  deepest hole -0.510,  1-sigma level  0.201
Q1    1   0.6009  0.0255  0.0000  10.50000  0.05    1.44
Q2    1   0.5000  0.1012  0.2500  10.50000  0.05    0.59
Q3    1   1.0961  0.0984  0.0963  11.00000  0.05    0.49
Q4    1   0.6534  0.1534  0.3709  10.50000  0.05    0.40
Q5    1   0.7426  0.2426  0.3348  10.50000  0.05    0.38
Q6    1   0.6778 -0.0395  0.0000  10.50000  0.05    0.37
Q7    1   0.7765  0.0398  0.0000  10.50000  0.05    0.32
Q8    1   0.6773  0.1773  0.1549  10.50000  0.05    0.18
Q9    1   0.5501  0.2962  0.3645  11.00000  0.05    0.16
Q10   1   0.7837 -0.0850  0.0000  10.50000  0.05    0.14
;
_shelx_res_checksum   90772

_shelx_hkl_file
;
   0   1   0 -7.3269 0.24068   3
   1   0   0 -7.2106 0.21203   3
  -1   0   0 -7.3512 0.20746   3
   0  -1   0 -7.1680 0.27385   3
   1  -1   0 9999.99 859.288   3
  -1   2   0 -8.3817 0.74344   3
  -2  -1   0 -8.4313 0.42864   3
   1  -2   0 -8.8974 0.62204   3
   0   2   0 4322.23 368.280   3
   0  -2   0 4137.71 368.265   3
  -2   0   0 4381.52 368.230   3
   2  -1   0 -10.287 0.55939   3
  -1  -2   0 -10.106 0.49773   3
  -2   1   0 -8.9511 0.73842   3
  -2   2   0 7033.14 598.726   3
  -2  -2   0 6917.60 598.474   3
  -2   3   0 -2.3495 0.78125   3
   2  -3   0 -2.8537 0.64129   3
  -3  -2   0 -3.2233 0.41933   5
  -3  -2   0 -3.1418 0.34558   3
  -3  -1   0 1402.36 118.568   3
  -1   3   0 1446.86 118.848   3
   1  -3   0 1279.96 118.775   3
  -3   0   0 -8.0130 0.55076   3
   0  -3   0 -8.1245 0.64963   3
   0  -3   0 -7.2319 1.06176   5
  -1  -3   0 1447.54 125.765   5
  -1  -3   0 1409.19 125.396   3
  -3   1   0 1512.68 125.514   3
  -2  -3   0 -3.4765 0.53754   5
  -2  -3   0 -3.6214 0.31418   3
   3  -2   0 -3.2589 0.61889   3
  -2  -3   0 -2.6512 0.44849   3
  -3   2   0 -1.8709 0.77513   3
  -3  -3   0 3057.89 250.991   5
  -3   3   0 2815.44 250.934   3
  -3  -3   0 2787.86 250.549   3
  -3  -3   0 3012.27 250.570   3
   3  -4   0 0.12857 1.04121   5
  -4  -2   0 3521.94 305.671   5
  -4  -2   0 4110.73 305.124   3
   2  -4   0 3009.75 306.258   5
  -4  -1   0 -1.1320 0.36905   3
   1  -4   0 -1.4722 0.55884   3
   1  -4   0 0.01902 0.90244   5
   0  -4   0 3847.26 365.441   5
   0  -4   0 4248.46 364.746   3
  -4   0   0 4633.59 364.657   3
  -1  -4   0 -1.0593 0.47271   3
  -1  -4   0 -0.6461 0.76702   5
  -4   1   0 -1.0259 0.53393   3
  -2  -4   0 4467.15 359.407   3
  -4   2   0 4119.62 359.647   3
  -2  -4   0 3994.51 360.233   5
  -2  -4   0 4167.05 359.452   3
  -3  -4   0 -1.1260 0.45223   5
  -3  -4   0 -1.2649 0.29633   3
  -3  -4   0 -0.7282 0.27725   3
  -3  -4   0 -1.0424 0.52534   5
  -4   5   0 0.98566 2.87314   6
   4  -5   0 0.37059 0.60608   2
   4  -5   0 0.62585 1.78773   6
   4  -5   0 -0.0833 0.60227   1
  -4   5   0 0.49741 2.30223   1
  -4   5   0 0.17971 1.88393   4
  -4   5   0 -1.1954 0.60088   2
  -3   5   0 1135.94 97.5978   6
   3  -5   0 1087.85 95.2669   2
  -3   5   0 1105.21 95.4088   2
  -3   5   0 1100.15 96.7508   4
   2  -5   0 -1.1688 0.81411   5
   1  -5   0 2520.47 246.654   5
  -5  -1   0 3182.16 245.678   3
  -5   0   0 -0.3029 0.47044   3
   0  -5   0 -0.9774 0.58034   3
   0  -5   0 0.22084 0.87654   5
  -1  -5   0 2828.83 257.394   5
  -1  -5   0 2976.71 256.724   3
  -5   1   0 3155.48 256.739   3
  -5   2   0 0.13924 0.65370   3
  -2  -5   0 -0.6627 0.45265   3
  -2  -5   0 -1.1713 0.64618   5
  -2  -5   0 -0.9383 0.36844   3
  -3  -5   0 1063.20 86.6654   3
  -3  -5   0 858.539 86.8966   5
   5  -3   0 1052.54 88.7119   6
  -5   3   0 1017.24 87.0573   2
  -3  -5   0 1066.43 86.6914   3
  -5   4   0 0.62151 2.02212   1
  -5   4   0 -0.4333 0.53135   2
   5  -4   0 -0.9416 1.59967   6
   5  -4   0 -0.6239 0.45059   2
  -5   4   0 -2.0571 2.37685   4
  -5   5   0 770.038 78.3296   6
   5  -5   0 854.730 75.9213   2
  -5   5   0 947.277 76.0286   2
  -5   5   0 842.402 77.5452   4
   5  -5   0 869.268 76.7422   1
   5  -5   0 985.445 77.6327   6
   5  -6   0 0.01176 0.40910   2
  -5   6   0 0.43435 1.81265   1
  -5   6   0 -2.8958 2.39635   6
   5  -6   0 0.22610 0.63832   1
   5  -6   0 -1.0687 1.29750   6
  -5   6   0 -0.1062 0.58741   2
  -5   6   0 -1.2472 1.85235   4
   4  -6   0 1202.04 96.6497   6
  -4   6   0 1141.74 95.0768   2
  -4   6   0 1028.85 96.5094   4
   4  -6   0 1163.20 95.0670   2
   4  -6   0 1074.28 96.0349   1
  -4   6   0 990.933 97.2336   6
  -3   6   0 0.45458 1.95554   6
  -3   6   0 0.70967 0.69087   2
  -3   6   0 1.05280 2.16231   1
  -3   6   0 1.66224 1.74669   4
   3  -6   0 0.02636 0.53052   2
   3  -6   0 -0.0646 0.72419   1
   3  -6   0 0.72812 0.93697   5
   3  -6   0 -0.4003 1.67840   6
  -2   6   0 1113.12 94.1843   6
  -2   6   0 1125.61 93.6436   4
   2  -6   0 1051.02 92.3104   2
   2  -6   0 1045.31 93.7249   1
  -2   6   0 1044.14 92.2970   2
   1  -6   0 0.42913 0.98855   1
  -1   6   0 0.27182 1.61701   6
   1  -6   0 0.20816 0.80868   5
   1  -6   0 0.00612 0.61393   2
  -6  -1   0 -0.4090 0.27238   5
  -1   6   0 0.41022 1.59671   4
   0  -6   0 2340.80 238.875   5
  -6   0   0 2841.14 238.064   3
   0  -6   0 3129.94 238.372   2
  -6   1   0 0.19548 0.42033   3
  -6   1   0 0.53725 3.75996   1
  -1  -6   0 0.22139 0.46604   3
   1   6   0 0.35512 1.62264   6
   6  -1   0 -1.0766 1.90196   6
  -1  -6   0 0.56980 0.82262   5
  -2  -6   0 862.065 80.9597   5
  -2  -6   0 956.860 80.6526   3
  -6   2   0 1015.80 80.8365   3
   6  -2   0 941.999 82.2495   6
  -2  -6   0 976.933 80.5581   3
  -6   2   0 867.376 80.7494   2
  -6   3   0 1.51828 2.23610   1
  -6   3   0 0.05697 0.58272   2
   6  -3   0 -0.9668 1.32643   6
   6  -4   0 1137.50 90.7721   6
  -6   4   0 871.847 90.6455   4
  -6   4   0 1093.48 89.1786   2
   6  -4   0 1012.14 89.1244   2
  -6   5   0 0.58187 2.00591   1
   6  -5   0 0.08320 0.45812   2
  -6   5   0 0.68939 0.69329   2
  -6   5   0 2.58780 2.38592   4
   6  -5   0 -1.3851 1.26753   6
  -6   6   0 366.638 31.1766   2
   6  -6   0 345.307 31.1029   2
  -6   6   0 334.954 32.3992   4
   6  -6   0 383.730 32.3066   6
  -6   7   0 1.04059 1.49582   1
  -6   7   0 -0.2239 0.46952   2
   6  -7   0 0.04603 0.34232   2
   6  -7   0 0.08973 1.07348   6
  -6   7   0 0.37195 1.64301   4
   5  -7   0 296.811 25.5497   6
  -5   7   0 253.594 26.4247   6
   5  -7   0 298.319 25.3485   1
   5  -7   0 288.839 24.5341   2
  -5   7   0 260.662 25.6955   4
  -5   7   0 272.842 24.5793   2
   4  -7   0 0.01654 0.57933   1
  -4   7   0 1.93859 1.67184   4
   4  -7   0 -1.0678 0.67740   5
  -4   7   0 -0.2947 0.46706   2
  -4   7   0 0.56742 1.86389   1
   4  -7   0 0.01866 1.29064   6
   4  -7   0 -0.1457 0.43283   2
  -4   7   0 -0.6402 1.99408   6
  -3   7   0 242.766 21.2850   2
  -3   7   0 226.862 22.3124   4
  -3   7   0 229.305 22.9845   6
   3  -7   0 254.418 21.2382   2
   3  -7   0 246.295 22.2783   1
  -2   7   0 0.03125 0.48247   2
  -2   7   0 -0.3158 1.64878   6
   2  -7   0 0.22313 0.51081   2
   2  -7   0 0.06476 0.76398   1
  -2   7   0 1.56522 1.43321   4
   2  -7   0 0.24724 0.84593   5
  -1   7   0 926.497 73.3570   6
   1  -7   0 814.519 71.5038   2
  -1   7   0 944.116 72.8665   4
  -7  -1   0 770.810 76.3416   1
   1  -7   0 735.584 72.9465   1
  -7   0   0 -0.1316 2.10117   1
   0   7   0 -1.1853 1.29893   4
   0  -7   0 -0.4186 0.48948   2
   0  -7   0 -0.0522 0.90497   1
   0   7   0 0.33059 1.39996   6
   7   0   0 0.47734 1.31122   6
   0  -7   0 0.63465 0.82327   5
   7  -1   0 704.896 63.3398   6
  -1  -7   0 791.087 62.1136   3
  -1  -7   0 772.228 62.0866   2
  -1  -7   0 638.340 62.4508   5
  -1  -7   0 687.323 62.1116   3
   2   7   0 0.50381 1.34131   6
  -7   2   0 0.10784 0.56451   2
  -2  -7   0 0.26199 0.42150   3
  -7   2   0 -0.6369 1.70587   1
  -2  -7   0 0.08637 0.45382   5
   2   7   0 0.41431 1.59097   4
   7  -2   0 -1.5738 1.04055   6
  -7   3   0 242.060 20.8449   2
   7  -3   0 232.111 21.9425   6
  -7   4   0 0.39897 0.62887   2
  -7   4   0 -0.0146 1.59708   1
   7  -4   0 -0.6104 0.44233   2
   7  -4   0 0.12823 1.37153   6
   7  -5   0 295.634 26.2778   2
  -7   5   0 301.874 26.3454   2
   7  -5   0 311.763 27.3960   6
   7  -6   0 -1.6917 0.96315   6
  -7   6   0 0.11723 0.50592   2
  -7   6   0 0.68679 1.46360   1
   7  -7   0 177.905 15.0789   6
  -7   7   0 154.655 14.4021   2
  -7   8   0 -0.4732 0.81345   1
  -7   8   0 0.34503 0.33019   2
   7  -8   0 0.08068 0.28541   2
  -6   8   0 199.634 14.8353   2
  -6   8   0 137.413 16.2122   1
  -6   8   0 166.492 15.6255   4
  -5   8   0 0.17021 0.38646   2
  -5   8   0 -1.3160 1.89425   6
  -5   8   0 -0.3701 1.39094   4
   5  -8   0 -0.2905 0.30258   2
   5  -8   0 0.20029 0.50098   1
  -5   8   0 0.27027 1.54413   1
  -4   8   0 166.286 14.2343   2
  -4   8   0 127.899 15.6411   6
   4  -8   0 167.922 14.9985   1
  -4   8   0 154.745 15.2159   4
   4  -8   0 169.689 14.1631   2
  -3   8   0 -0.4262 0.47755   2
  -3   8   0 1.43625 1.54801   4
   3  -8   0 -0.2108 0.52281   1
   3  -8   0 0.00632 0.38526   2
  -3   8   0 0.45297 1.80026   6
   3  -8   0 -0.1805 0.78626   5
   2  -8   0 313.343 26.2662   2
  -2   8   0 290.741 26.3315   2
  -2   8   0 305.115 27.3947   4
   2  -8   0 312.597 27.4319   1
  -2   8   0 281.457 27.8322   6
  -1   8   0 -0.6915 1.35500   6
  -8  -1   0 -0.2012 1.65915   1
   1  -8   0 0.53187 0.73877   5
   1  -8   0 0.04999 0.43004   2
  -1   8   0 1.16399 1.43220   4
   1  -8   0 -0.0904 0.66401   1
   8   1   0 -0.1173 1.10952   6
   8   0   0 619.087 54.9837   6
  -8   0   0 658.777 57.3980   1
   0  -8   0 647.258 54.0269   2
   0  -8   0 587.310 55.5771   1
   1   8   0 2.14343 1.64432   6
  -1  -8   0 -0.9075 0.46081   5
  -8   1   0 -0.2785 1.54394   1
   1   8   0 0.02210 1.32612   4
   8  -1   0 -1.0804 1.00622   6
  -1  -8   0 0.30755 0.91975   1
   8  -2   0 294.637 26.6216   6
  -3  -8   0 -0.5193 0.88009   1
   8  -3   0 -0.3545 1.14028   6
  -8   3   0 -0.3700 0.71689   2
  -8   3   0 0.62810 2.00308   1
   3   8   0 -0.0333 1.37725   6
   8  -4   0 195.393 17.0389   6
  -8   4   0 173.840 15.9905   2
  -8   5   0 -0.8412 1.07407   1
  -8   5   0 -0.3349 0.49093   2
   8  -5   0 0.24677 0.46076   2
   8  -5   0 0.58589 1.09926   6
   8  -6   0 210.467 19.3846   2
  -8   6   0 224.743 19.3890   2
   8  -6   0 236.484 20.0881   6
   8  -7   0 0.82095 0.70301   6
  -8   7   0 -0.2912 0.83143   1
   8  -7   0 0.07353 0.30515   2
  -8   7   0 0.17977 0.35541   2
   8  -8   0 71.5999 6.84018   2
  -8   8   0 92.3368 7.85990   1
  -8   8   0 74.9305 6.82667   2
  -7   9   0 57.8923 5.17877   2
   7  -9   0 59.3489 5.16806   2
   6  -9   0 0.20692 0.28450   2
  -6   9   0 1.27975 1.05565   4
  -6   9   0 0.45692 0.28370   2
  -5   9   0 102.064 12.0456   4
  -5   9   0 128.624 11.4543   2
  -5   9   0 114.044 12.6348   6
   5  -9   0 153.713 12.0221   1
   4  -9   0 -0.6346 0.27135   2
  -4   9   0 0.10531 0.39538   2
  -4   9   0 -1.4885 1.05251   4
  -4   9   0 -1.1701 1.38339   6
   4  -9   0 -0.0562 0.42605   1
   4  -9   0 0.17520 0.57774   5
  -3   9   0 213.463 19.1804   2
  -3   9   0 203.124 20.6167   6
   3  -9   0 226.061 19.9277   1
  -3   9   0 200.678 20.0178   4
   3  -9   0 237.166 19.1111   2
   2  -9   0 0.06540 0.61730   5
  -2   9   0 -0.0245 1.42169   6
   2  -9   0 -0.1986 0.47883   1
  -2   9   0 0.61508 1.34660   4
  -2   9   0 0.63003 0.51601   2
   2  -9   0 0.17227 0.35111   2
  -1   9   0 237.898 20.3719   4
   1  -9   0 216.131 19.1719   2
  -1   9   0 227.005 20.8440   6
   1  -9   0 216.046 20.2520   1
   0   9   0 1.21913 1.32260   4
   9   0   0 -0.1931 1.02233   6
   0   9   0 -0.1786 1.34547   6
  -9   0   0 0.73828 1.76094   1
   0  -9   0 -0.0426 0.51517   5
   0  -9   0 0.10683 0.67035   1
  -9   1   0 269.670 25.6755   1
   9  -1   0 229.592 23.3545   6
  -1  -9   0 228.510 23.7773   1
   1   9   0 323.695 23.8985   4
   1   9   0 302.657 24.2581   6
  -9   2   0 -1.0717 1.28108   1
  -2  -9   0 0.01752 0.71364   1
   2   9   0 -0.5283 1.08466   6
   2   9   0 -0.1617 1.31307   4
   9  -2   0 -0.4679 0.88892   6
  -9   3   0 203.002 20.8673   1
   9  -3   0 250.858 19.2639   6
  -3  -9   0 185.056 19.3732   1
  -4  -9   0 -0.2264 0.69845   1
   4   9   0 0.73666 1.12306   6
  -9   4   0 0.46788 1.33776   1
   9  -4   0 -0.1746 0.86137   6
   9  -5   0 150.752 12.4387   6
  -9   5   0 128.245 13.5208   1
   9  -5   0 126.987 11.7814   2
  -9   6   0 0.06669 0.87057   1
   9  -6   0 -0.6358 0.23763   2
   9  -6   0 0.48300 0.70995   6
   9  -7   0 59.5136 6.16390   2
   9  -7   0 76.8692 6.51296   6
  -9   7   0 80.0214 7.19549   1
  -6  10   0 47.6755 4.23713   2
  -5  10   0 0.13722 0.23929   2
  -5  10   0 0.48497 0.84577   4
   5 -10   0 -0.1981 0.18688   2
   4 -10   0 181.559 14.1279   1
  -4  10   0 129.258 14.5302   6
  -4  10   0 153.558 13.6263   2
   4 -10   0 158.529 13.5557   2
  -4  10   0 138.222 14.1992   4
   3 -10   0 0.05202 0.35942   1
  -3  10   0 -0.7559 0.29591   2
  -3  10   0 -0.3182 0.99583   4
  -3  10   0 -0.2247 1.25493   6
  -2  10   0 269.720 25.1045   6
  -2  10   0 269.638 23.8234   2
   2 -10   0 293.359 24.4765   1
  -2  10   0 254.718 24.5556   4
  10   1   0 -0.2709 0.70864   6
   1 -10   0 -0.0324 0.34679   5
  -1  10   0 2.10907 1.53728   6
   1 -10   0 -0.0277 0.41929   1
  -1  10   0 0.21925 1.06703   4
 -10  -1   0 -0.8077 1.20552   1
   0  10   0 84.3609 9.32735   6
   0 -10   0 91.6933 8.89649   1
   0  10   0 105.798 9.14188   4
 -10   1   0 0.10662 1.35903   1
   1  10   0 -0.3421 1.00970   4
  10  -1   0 0.69275 0.96478   6
   1  10   0 0.89638 1.25080   6
  -1 -10   0 0.06841 0.52103   1
   2  10   0 399.094 33.1858   6
  10  -2   0 378.368 32.6667   6
   2  10   0 386.014 32.7780   4
  -2 -10   0 335.070 32.7384   1
   3  10   0 -0.6614 0.81811   6
  -3 -10   0 -0.1584 0.50794   1
 -10   3   0 -0.1677 1.03795   1
  10  -3   0 -0.7067 0.70927   6
 -10   4   0 264.191 22.4863   1
  -4 -10   0 204.506 21.2472   1
   4  10   0 279.119 21.6431   6
  10  -4   0 230.051 21.2119   6
  10  -5   0 -0.4703 0.53203   6
 -10   5   0 0.04907 0.71440   1
 -10   6   0 93.4551 8.95197   1
  -4  11   0 0.94258 1.00713   4
  -3  11   0 100.659 10.3331   6
   3 -11   0 122.743 9.90966   1
  -3  11   0 104.332 9.56599   2
  -3  11   0 102.295 10.0385   4
   2 -11   0 0.20029 0.33511   1
  -2  11   0 -0.5701 0.73776   4
  -2  11   0 -0.5863 0.91225   6
  -2  11   0 0.40083 0.30281   2
   1 -11   0 87.3444 8.21515   1
  -1  11   0 90.9473 8.42214   4
  -1  11   0 92.4073 8.83459   6
 -11   0   0 0.63831 1.16381   1
   0  11   0 -0.2459 0.78977   4
   0  11   0 -0.3014 0.83630   6
  11   0   0 -0.2174 0.55948   6
   0 -11   0 -0.3051 0.29125   1
  -1 -11   0 87.2732 8.55081   1
   1  11   0 104.539 8.80492   4
   1  11   0 96.8589 9.10028   6
   2  11   0 0.05965 0.75649   6
   2  11   0 -0.1572 0.84557   4
 -11   2   0 -0.3580 0.83338   1
  -2 -11   0 0.01545 0.31448   1
  11  -2   0 0.33560 0.58346   6
   3  11   0 143.077 12.4471   6
  -3 -11   0 130.855 12.0680   1
 -11   4   0 -0.1572 0.65118   1
  11  -4   0 -0.1118 0.39999   6
   0   0   1 -0.0204 0.09789   3
   0  -1  -1 -6.1473 0.24051   3
   1   0  -1 -5.9743 0.24954   3
  -1   0   1 -6.0487 0.29736   3
   0   1   1 -5.8869 0.28513   3
   1   0   1 -6.0813 0.17290   3
   1  -1  -1 -0.1408 0.29069   3
  -1   1  -1 -0.5412 0.45125   3
   1  -1   1 -0.5339 0.42134   3
  -1   1   1 -0.6148 0.46507   3
  -1  -1   1 -0.7586 0.24777   3
  -1   2  -1 4.65118 1.08319   3
   1  -2  -1 2.15286 0.88837   3
  -2  -1   1 2.22575 0.63618   3
   1  -2   1 2.87826 0.87579   3
  -1   2   1 2.51045 0.94462   3
  -2   0  -1 -2.7280 0.44266   3
   0  -2  -1 -2.3878 0.61465   3
   2   0  -1 -2.6466 0.41510   3
   0   2   1 -3.2188 0.49850   3
   0  -2   1 -2.0511 0.60266   3
  -2   0   1 -2.3967 0.60259   3
  -1  -2  -1 2.43037 0.59954   3
  -2   1  -1 3.36823 0.96564   3
   2  -1  -1 1.53241 0.75064   3
  -2   1   1 3.19556 0.92355   3
   2  -1   1 1.86109 0.75282   3
   2  -2  -1 -0.4869 0.50496   3
  -2   2  -1 -0.5302 0.78684   3
  -2   2   1 -0.1126 0.83082   3
  -2  -2   1 0.08383 0.59997   5
   2  -2   1 0.07651 0.68918   3
  -2  -2   1 -0.8583 0.36646   3
   2  -3  -1 18.6244 2.49834   3
  -2   3  -1 28.0480 2.84574   3
  -2   3   1 22.0828 2.60647   3
   2  -3   1 14.2765 2.30375   3
  -3  -2   1 22.7649 2.24574   5
  -3  -2   1 20.3857 2.10014   3
   1  -3  -1 -1.3390 0.92779   5
   1  -3  -1 -0.8384 0.62845   3
  -1   3   1 1.10034 0.73915   3
   1  -3   1 -0.9298 0.55862   3
  -3  -1   1 -1.1982 0.51038   3
  -3   0  -1 0.04467 0.50614   3
   0  -3  -1 -0.2941 0.92936   5
   0  -3  -1 0.11326 0.63745   3
  -3   0   1 0.42850 0.66651   3
   0  -3   1 0.47669 0.64796   3
  -3   1  -1 -0.8326 0.60602   3
  -1  -3  -1 -0.9243 0.44593   3
  -1  -3  -1 0.21739 0.75462   5
   3  -1  -1 -0.5725 0.60456   3
  -1  -3   1 -0.6200 0.51712   3
  -3   1   1 -1.7418 0.60565   3
  -1  -3   1 -1.1746 0.73575   5
  -2  -3  -1 14.8262 1.96034   5
  -3   2  -1 29.4049 2.50202   3
  -2  -3  -1 20.8236 1.87146   3
   3  -2  -1 14.3908 2.34182   3
  -2  -3  -1 19.1671 1.89994   3
  -2  -3   1 23.4069 2.16762   3
  -2  -3   1 25.1255 2.42385   5
  -2  -3   1 24.6857 2.10114   3
  -3   2   1 20.3915 2.57328   3
  -3   3  -1 0.20324 0.74341   3
  -3  -3   1 -0.1740 0.39081   3
  -3   3   1 0.34639 0.80458   3
  -3  -3   1 1.10931 0.69028   5
   3  -4  -1 0.15675 1.07244   5
  -4  -3   1 0.06242 0.39175   3
  -4  -3   1 -0.1198 0.50751   5
   2  -4  -1 -0.4381 0.91557   5
  -4  -2   1 0.70650 0.49793   3
   2  -4   1 1.06901 0.99817   5
   1  -4  -1 1.02945 0.63948   3
   1  -4  -1 1.00236 0.95859   5
   1  -4   1 0.78969 0.69033   3
  -4  -1   1 -0.1064 0.49898   3
   1  -4   1 1.17643 0.93172   5
   0  -4  -1 0.69154 0.87486   5
   0  -4  -1 -0.0652 0.49200   3
  -4   0  -1 -0.2705 0.37582   3
   0  -4   1 0.08742 0.54207   3
   0  -4   1 0.24801 0.72354   5
  -4   0   1 -0.7929 0.47583   3
  -1  -4  -1 1.05646 0.53865   3
  -1  -4  -1 1.68974 0.84528   5
  -4   1  -1 1.34069 0.62700   3
  -4   1   1 0.96860 0.69155   3
  -1  -4   1 0.21342 0.54514   3
  -1  -4   1 0.52106 0.72892   5
  -2  -4  -1 1.22480 0.58753   5
  -2  -4  -1 -0.2862 0.26163   3
  -2  -4  -1 0.23363 0.53895   5
  -4   2  -1 0.46416 0.67369   3
  -2  -4  -1 -0.0619 0.32772   3
  -4   2   1 -0.4406 0.65785   3
  -2  -4   1 0.10023 0.42429   3
  -2  -4   1 0.59033 0.73779   5
  -2  -4   1 -0.0189 0.46838   3
  -4   3  -1 0.62276 0.75881   3
  -3  -4   1 0.09523 0.37138   3
  -3  -4   1 -0.2099 0.39752   3
  -3  -4   1 0.19228 0.63536   5
  -4   4  -1 0.90977 0.76180   2
  -4  -4   1 -0.3854 0.28331   3
  -4  -4   1 0.15864 0.44535   5
  -4   4   1 0.36805 0.80072   2
  -4  -4   1 -0.1097 0.26596   3
   4  -5  -1 -0.1091 0.45571   2
  -4   5  -1 -0.0003 1.84291   4
  -4   5  -1 -0.8728 1.86323   1
  -4   5  -1 0.90855 0.64653   2
   4  -5  -1 0.53014 0.77113   1
  -4   5  -1 -3.2947 2.57285   6
   4  -5  -1 0.12829 1.73414   6
  -4   5   1 1.87403 3.00005   6
   4  -5   1 0.32216 0.83281   1
  -4   5   1 0.34529 0.72484   2
  -4   5   1 2.48249 2.11872   4
   4  -5   1 1.11710 0.65515   2
   4  -5   1 0.01125 1.86349   6
  -4   5   1 1.38601 2.47823   1
   3  -5  -1 -0.2514 0.57982   2
  -3   5  -1 0.05136 0.58888   2
  -3   5  -1 -1.1848 2.32844   6
   3  -5  -1 -0.3802 0.77451   5
   3  -5  -1 -0.4618 0.67108   1
  -3   5  -1 -1.2508 1.79747   4
  -5  -3   1 -0.1450 0.22560   3
  -5  -3   1 -0.1438 0.20830   3
  -3   5   1 -0.4253 2.47949   6
  -5  -3   1 -0.1197 0.31018   5
   3  -5   1 1.35060 2.22087   6
   3  -5   1 -0.7826 0.76288   5
  -3   5   1 -0.1740 0.77050   2
   3  -5   1 0.70557 0.65649   2
  -5  -3   1 0.18215 0.29210   5
  -3   5   1 -1.5659 1.80187   4
   2  -5  -1 -1.0938 0.80868   5
   2  -5   1 0.83807 0.88297   5
  -5  -2   1 0.45258 0.44030   5
  -5  -2   1 0.72113 0.43745   3
   1  -5  -1 -0.3030 0.54458   3
   1  -5  -1 1.22334 0.97749   5
   1  -5   1 0.05605 0.90198   5
  -5  -1   1 -0.1146 0.49157   3
  -5   0  -1 -0.9969 0.34040   3
   0  -5  -1 -0.9970 0.51527   3
   0  -5  -1 0.61464 0.92397   5
   0  -5   1 -0.8844 0.82766   5
  -5   0   1 -1.0742 0.49878   3
   0  -5   1 -0.1293 0.57689   3
  -1  -5  -1 -0.2278 0.45978   3
  -1  -5  -1 -0.1707 0.76284   5
  -5   1  -1 -0.4978 0.44873   3
  -1  -5   1 0.20067 0.79454   5
  -5   1   1 -0.3521 0.58004   3
  -1  -5   1 0.73422 0.65352   3
  -5   2  -1 0.25004 0.57319   3
  -2  -5  -1 -0.2759 0.30851   3
  -2  -5  -1 0.50203 0.29320   3
  -2  -5  -1 0.09180 0.51830   5
  -5   2   1 -0.2028 0.56655   3
  -2  -5   1 -0.1822 0.49077   3
  -2  -5   1 0.77008 0.45276   3
  -2  -5   1 1.15780 0.83218   5
  -5   3  -1 0.30183 2.30420   1
  -5   3  -1 0.57901 0.71790   2
   5  -3  -1 1.26998 1.79022   6
  -3  -5   1 -0.3920 0.36125   3
  -5   3   1 -0.9091 0.59244   2
   5  -3   1 -1.4458 1.69354   6
  -5   3   1 2.79496 2.97988   1
  -3  -5   1 -0.1344 0.57339   5
  -3  -5   1 -0.2414 0.29366   3
   5  -4  -1 0.91937 0.77435   1
  -5   4  -1 -2.5934 2.46756   4
   5  -4  -1 1.21781 1.77827   6
  -5   4  -1 0.68456 0.72119   2
  -5   4  -1 -0.8626 1.85497   1
   5  -4  -1 0.48054 0.56635   2
  -5   4   1 0.78935 2.08540   1
   5  -4   1 0.54391 0.62223   2
  -4  -5   1 0.66427 0.21576   3
  -5   4   1 -0.3035 0.65594   2
  -5   4   1 -0.4819 2.44303   4
   5  -4   1 1.07480 1.59094   6
  -5   4   1 -0.8019 3.60340   6
  -4  -5   1 0.50786 0.18752   3
  -5   5  -1 -0.9648 0.50011   2
   5  -5  -1 -0.0310 0.55568   1
   5  -5  -1 -0.5317 0.42949   2
  -5   5  -1 4.00451 2.65017   4
   5  -5  -1 -1.1032 1.48976   6
  -5   5  -1 0.53930 1.85611   1
  -5   5   1 -0.4052 2.92916   6
  -5   5   1 0.07378 0.56466   2
  -5   5   1 -1.4631 1.83049   1
   5  -5   1 -0.3340 0.45422   2
   5  -5   1 -0.9786 1.40700   6
  -5   5   1 1.66885 2.24200   4
  -5   6  -1 -0.4058 1.57804   1
   5  -6  -1 1.92689 1.58046   6
   5  -6  -1 0.76044 0.72008   1
  -5   6  -1 -1.9948 1.62911   4
  -5   6  -1 0.26961 0.55299   2
  -5   6  -1 -0.2230 2.77654   6
   5  -6  -1 -0.0885 0.43613   2
  -5   6   1 -0.3422 0.53464   2
   5  -6   1 -0.2325 0.61521   1
  -5   6   1 -0.6332 1.67386   1
  -5   6   1 -0.6762 1.70961   4
   5  -6   1 0.49409 0.50184   2
   5  -6   1 -1.9414 1.18146   6
  -5   6   1 2.20399 2.82758   6
  -4   6  -1 -0.0440 1.75375   1
  -4   6  -1 1.17860 1.73420   4
  -4   6  -1 0.04995 0.50455   2
   4  -6  -1 1.79471 1.63539   6
   4  -6  -1 -0.1860 0.55457   1
   4  -6  -1 -0.6533 0.96995   5
  -4   6  -1 0.06919 2.43672   6
   4  -6  -1 0.51970 0.51534   2
  -4   6   1 1.72703 1.99927   4
   4  -6   1 0.26081 0.69087   1
   4  -6   1 -0.9109 1.48371   6
  -4   6   1 -1.0338 2.31217   6
   4  -6   1 0.28507 0.52889   2
  -4   6   1 -2.1135 1.61457   1
  -4   6   1 0.38707 0.64437   2
  -3   6  -1 1.54693 1.73155   4
   3  -6  -1 0.28536 0.68617   1
  -3   6  -1 0.42383 2.16038   1
   3  -6  -1 -0.3831 1.77523   6
  -3   6  -1 0.57171 0.56649   2
   3  -6  -1 0.20663 0.76681   5
   3  -6  -1 0.78841 0.58266   2
  -3   6  -1 0.15026 2.01827   6
   3  -6   1 -0.2552 0.44912   2
  -3   6   1 0.37659 1.74469   4
   3  -6   1 -0.0851 0.71908   1
  -3   6   1 0.33748 1.88901   6
  -3   6   1 0.36538 0.58757   2
  -3   6   1 1.87208 2.26803   1
   3  -6   1 -0.0974 0.81686   5
   3  -6   1 1.68346 1.78230   6
  -2   6  -1 0.05427 1.54791   4
  -2   6  -1 0.39698 1.85002   6
   2  -6  -1 -0.0677 0.74703   1
  -2   6  -1 0.14263 0.56976   2
   2  -6  -1 0.27810 0.88203   5
  -2   6  -1 1.27160 2.34832   1
   2  -6  -1 -0.5832 0.54559   2
   2  -6   1 0.62407 0.85957   5
   2  -6   1 0.42409 1.02232   1
  -2   6   1 1.81216 1.74201   4
  -2   6   1 -0.0628 0.64079   2
  -6  -2   1 -0.1048 0.22312   5
   2  -6   1 -1.5156 1.92788   6
  -2   6   1 -0.0157 1.88172   6
  -6  -2   1 0.15043 0.18819   3
   2  -6   1 0.02142 0.56271   2
  -6  -2   1 -0.0472 0.22780   5
  -1   6  -1 -0.2210 1.64284   6
   1  -6  -1 0.86764 1.09800   1
  -1   6  -1 1.41872 1.63667   4
   1  -6  -1 0.45161 0.59495   2
   1  -6  -1 0.51340 0.88616   5
   1  -6   1 1.43764 0.64027   2
  -1   6   1 0.43255 1.77565   6
   1  -6   1 0.81795 1.16706   1
  -1   6   1 -0.8085 1.60580   4
   1  -6   1 0.69037 0.77987   5
  -6  -1   1 0.42137 0.36651   3
   0  -6  -1 -0.8212 0.73733   5
   0  -6  -1 0.52642 0.51498   3
   0   6  -1 0.04303 1.63441   6
   0  -6  -1 0.02915 0.58262   2
   0  -6  -1 0.60951 1.13359   1
   0   6  -1 0.73790 1.52772   4
   0   6   1 1.10680 1.73502   6
   0  -6   1 0.31538 0.82463   5
  -6   0   1 0.63315 0.49312   3
   0  -6   1 -0.1650 0.63021   2
   0  -6   1 0.77010 1.33271   1
   1   6  -1 1.48936 1.72824   4
   6  -1  -1 2.68080 1.73215   6
  -1  -6  -1 -0.0822 0.63841   5
   1   6  -1 0.38729 1.63447   6
  -1  -6  -1 0.30601 0.39367   3
  -6   1   1 0.98590 2.33694   1
  -1  -6   1 0.69695 0.57103   3
  -6   1   1 0.55189 0.64758   2
  -6   1   1 0.36431 0.52216   3
  -1  -6   1 0.83895 0.66038   2
  -1  -6   1 0.04174 0.69029   5
  -2  -6  -1 0.20161 0.45558   5
  -6   2  -1 -0.4263 2.10346   1
   6  -2  -1 0.82451 1.60026   6
  -2  -6  -1 0.20206 0.25215   3
  -2  -6  -1 0.27302 0.22983   3
   2   6  -1 -1.0947 1.34795   6
  -6   2  -1 0.67364 0.66333   2
  -2  -6   1 -0.6979 0.39017   3
  -6   2   1 -1.9565 1.92691   1
  -2  -6   1 -0.9819 0.52412   5
  -2  -6   1 0.31047 0.62019   2
  -6   2   1 0.07134 0.66855   2
   6  -2   1 -0.1804 1.62913   6
  -2  -6   1 -0.6225 0.34886   3
   6  -3  -1 -0.3212 1.42075   6
  -6   3  -1 0.86315 0.64357   2
   3   6  -1 0.57977 1.53106   6
  -6   3  -1 -1.1292 1.54458   1
   6  -3  -1 -0.2510 0.52782   2
   6  -3   1 -0.1173 1.41870   6
  -3  -6   1 -0.6931 1.21802   1
  -6   3   1 1.35989 2.20129   1
  -3  -6   1 -0.2406 0.47423   5
  -3  -6   1 -0.0956 0.34454   3
  -3  -6   1 0.04568 0.25609   3
  -6   3   1 0.04893 0.60922   2
   6  -4  -1 0.15151 0.51449   2
  -6   4  -1 -0.4274 1.75579   1
   4   6  -1 0.88764 1.50303   6
   6  -4  -1 1.68596 1.53482   6
  -6   4  -1 -0.3047 0.56604   2
  -6   4   1 -0.7390 0.55578   2
  -6   4   1 0.55285 1.99280   1
   6  -4   1 -0.6090 1.40658   6
  -6   4   1 -0.1453 2.37329   4
  -4  -6   1 -0.3106 1.23726   1
   6  -4   1 -0.1973 0.54077   2
   6  -5  -1 0.06534 0.49561   2
  -6   5  -1 -0.7881 1.43487   1
   6  -5  -1 -0.2585 1.44840   6
  -6   5  -1 -0.3131 0.55417   2
  -6   5  -1 0.17686 2.30217   4
  -6   5   1 -0.5099 1.69038   1
   6  -5   1 0.07232 1.46535   6
   6  -5   1 -0.1093 0.44638   2
  -6   5   1 -0.2297 2.18825   4
  -6   5   1 -0.1678 0.51669   2
  -6   6  -1 1.59582 2.14168   4
   6  -6  -1 -0.2672 0.38979   2
  -6   6  -1 -0.7564 1.35227   1
  -6   6  -1 0.23432 0.59533   2
   6  -6  -1 -1.0105 1.11613   6
   6  -6   1 -0.1166 0.38301   2
  -6   6   1 -0.0554 1.52818   1
  -6   6   1 -0.1630 0.48434   2
   6  -6   1 -0.9291 1.27438   6
  -6   6   1 3.13117 2.21188   4
  -6   7  -1 1.46707 1.72392   4
  -6   7  -1 -0.0744 0.48492   2
   6  -7  -1 -0.1050 1.04726   6
  -6   7  -1 0.56392 1.51654   1
   6  -7   1 0.51991 0.40379   2
  -6   7   1 0.19038 0.41251   2
  -6   7   1 0.07931 1.58542   4
  -6   7   1 0.41702 1.63764   1
   6  -7   1 -0.3435 1.01558   6
  -5   7  -1 -1.2391 0.40893   2
  -5   7  -1 1.87766 1.80077   4
   5  -7  -1 0.14268 0.54730   1
   5  -7  -1 0.16539 1.17652   6
  -5   7  -1 0.48258 1.50139   1
  -5   7  -1 -1.5935 2.34112   6
   5  -7  -1 -0.2592 0.38739   2
  -5   7   1 -1.0379 1.51650   1
  -5   7   1 2.04200 2.39766   6
   5  -7   1 0.27305 0.43490   2
   5  -7   1 0.10587 1.32470   6
   5  -7   1 -0.2464 0.55384   1
  -5   7   1 0.22610 0.51375   2
  -5   7   1 1.28120 1.79283   4
   4  -7  -1 1.13475 1.77822   6
  -4   7  -1 -0.5248 1.49383   1
  -4   7  -1 0.10854 0.50784   2
  -4   7  -1 -1.0669 2.08029   6
   4  -7  -1 0.15849 0.59206   1
  -4   7  -1 2.27670 1.72233   4
   4  -7  -1 1.02072 0.53936   2
   4  -7  -1 -0.5586 0.66775   5
  -4   7   1 0.01257 1.93214   1
  -4   7   1 1.11075 1.65269   4
   4  -7   1 0.00698 0.58919   1
   4  -7   1 0.11216 0.41606   2
  -4   7   1 -2.3811 1.90710   6
   4  -7   1 0.39970 1.44975   6
  -4   7   1 0.44537 0.54763   2
   3  -7  -1 -0.0431 0.46400   2
  -3   7  -1 -0.8545 1.64444   6
   3  -7  -1 -1.2679 0.69767   5
  -3   7  -1 -0.0758 0.50076   2
  -3   7  -1 -1.3649 1.57505   1
  -3   7  -1 -2.2078 1.35957   4
   3  -7  -1 0.22147 0.65301   1
  -3   7   1 0.61356 1.63900   4
  -3   7   1 -0.8541 0.45153   2
   3  -7   1 -0.1662 1.51349   6
   3  -7   1 -0.0436 0.63654   1
  -3   7   1 0.12731 1.82916   6
   3  -7   1 0.11095 0.73498   5
   3  -7   1 0.18501 0.49892   2
   2  -7  -1 0.16237 0.78261   1
  -2   7  -1 0.09906 0.55922   2
  -2   7  -1 0.17561 1.66303   6
   2  -7  -1 -0.1006 0.45776   2
  -2   7  -1 1.70232 1.31505   4
   2  -7  -1 -0.8186 0.74571   5
  -7  -2   1 0.07575 1.86938   1
  -2   7   1 -1.5882 1.45797   4
   2  -7   1 1.87430 0.65962   2
   2  -7   1 0.27234 0.67367   5
  -2   7   1 -0.3834 1.66297   6
  -2   7   1 1.24291 0.77233   2
   2  -7   1 1.25274 1.06152   1
   1  -7  -1 0.75459 0.51550   2
  -1   7  -1 -1.3570 1.19525   4
   1  -7  -1 -0.3548 0.70827   5
  -1   7  -1 0.80965 1.47388   6
   7   1  -1 0.76556 1.26958   6
  -1   7  -1 -0.0387 0.60664   2
   1  -7  -1 0.09568 0.81518   1
  -7  -1   1 0.14375 0.21296   5
   1  -7   1 0.09515 0.95390   1
  -1   7   1 0.37945 1.46901   6
   1  -7   1 -0.6485 0.50743   2
  -7  -1   1 1.53976 2.11368   1
  -1   7   1 0.78271 1.42131   4
   1  -7   1 1.75794 0.96562   5
   0  -7  -1 0.25654 0.83345   1
   0   7  -1 1.38255 1.53519   6
   0   7  -1 -2.0041 1.29498   4
   0  -7  -1 -0.0048 0.64522   5
   7   0  -1 1.01714 1.36562   6
   0  -7  -1 0.88631 0.53533   2
  -7   0  -1 -0.3932 1.98152   1
  -7   0   1 0.19073 0.32149   3
   0   7   1 0.49283 1.49418   6
   0  -7   1 0.24827 0.99130   1
   0   7   1 -0.8592 1.67980   4
   0  -7   1 -0.3078 0.49826   2
   0  -7   1 0.40891 0.78607   5
  -7   0   1 0.40421 1.92956   1
  -7   1  -1 -0.7999 1.86171   1
  -1  -7  -1 -0.2901 0.33152   3
   1   7  -1 0.75367 1.51237   4
   1   7  -1 0.30733 1.47974   6
   7  -1  -1 -0.3838 1.20728   6
  -1  -7  -1 -0.0069 0.33708   3
  -1  -7  -1 -0.2724 0.94693   1
  -1  -7  -1 -0.0756 0.57539   5
   1   7   1 1.25788 1.62089   4
  -7   1   1 0.13534 0.59356   2
  -1  -7   1 -0.1129 0.49714   3
   7  -1   1 0.41761 1.46434   6
  -7   1   1 -0.0472 2.22358   1
   1   7   1 -0.1175 1.46733   6
  -7   1   1 0.29929 0.44497   3
  -1  -7   1 -0.5850 0.60473   5
  -1  -7   1 0.52308 0.58839   2
  -1  -7   1 -0.1247 0.91133   1
  -2  -7  -1 -0.1067 0.96892   1
   2   7  -1 -0.4399 1.39445   4
   7  -2  -1 -0.1152 1.25876   6
   2   7  -1 0.74216 1.51940   6
  -7   2  -1 1.32194 2.23253   1
  -2  -7   1 0.18280 0.59714   5
   2   7   1 -0.5257 1.40888   6
  -7   2   1 0.49769 0.61864   2
  -7   2   1 -0.2830 1.90441   1
  -2  -7   1 0.08821 0.37313   3
  -2  -7   1 0.20962 0.42713   3
   7  -2   1 -0.3523 1.42810   6
  -7   3  -1 -0.1897 1.54604   1
   3   7  -1 -0.6344 1.28712   6
   7  -3  -1 -0.4597 1.25667   6
  -7   3  -1 -0.5197 0.55152   2
  -7   3   1 0.10436 0.65074   2
  -7   3   1 0.04062 1.73106   1
   7  -3   1 0.65016 1.39329   6
  -7   4  -1 0.90409 1.73891   1
   7  -4  -1 2.39770 1.45328   6
  -7   4  -1 0.56983 0.63548   2
   4   7  -1 -0.5379 1.39155   6
  -7   4   1 -0.4234 1.60183   1
   7  -4   1 0.64766 1.41520   6
  -7   4   1 -0.0433 0.61801   2
   5   7  -1 -0.0966 1.36502   6
  -7   5  -1 -0.8011 0.47810   2
   7  -5  -1 0.39475 1.16159   6
  -7   5  -1 -1.2005 1.11223   1
  -7   5   1 -0.0782 1.76745   1
   7  -5   1 -0.0077 0.46553   2
   7  -5   1 -0.7626 1.28000   6
  -7   5   1 -0.1046 0.57927   2
  -7   6  -1 0.45515 1.47222   1
   7  -6  -1 -0.5284 0.95859   6
  -7   6  -1 0.01754 0.45588   2
   7  -6   1 0.19396 0.33768   2
  -7   6   1 0.60293 2.09832   4
  -7   6   1 -0.3816 0.47394   2
   7  -6   1 0.29413 1.08071   6
  -7   6   1 -0.3016 1.39644   1
  -7   7  -1 -0.0397 0.95184   1
   7  -7  -1 0.50288 0.86112   6
  -7   7  -1 -0.6610 0.34795   2
   7  -7  -1 -0.1742 0.34072   2
   7  -7   1 0.01664 0.30308   2
  -7   7   1 0.25480 1.48903   4
  -7   7   1 0.22652 0.42738   2
   7  -7   1 -0.0528 0.85251   6
  -7   7   1 0.64586 1.24482   1
   7  -8  -1 -0.2645 0.25223   2
  -7   8  -1 -0.0537 0.31992   2
  -7   8  -1 0.35345 0.86722   1
   7  -8   1 0.07257 0.67831   6
  -7   8   1 0.03777 0.31385   2
  -7   8   1 -0.9647 1.10375   1
  -6   8  -1 0.14910 0.37879   2
  -6   8  -1 0.39325 1.38504   4
  -6   8  -1 -0.4796 1.00061   1
  -6   8   1 0.03924 0.34612   2
   6  -8   1 0.16092 0.84775   6
  -6   8   1 0.00438 1.19658   4
   6  -8   1 -0.2217 0.28482   2
  -5   8  -1 0.39411 1.36032   1
   5  -8  -1 -0.0350 0.42067   1
  -5   8  -1 -2.7556 1.83129   6
   5  -8  -1 0.52655 0.72783   5
  -5   8  -1 0.30707 0.43202   2
  -5   8  -1 0.78087 1.48402   4
   5  -8   1 0.17669 0.49571   1
  -5   8   1 0.21745 2.00195   6
   5  -8   1 0.32429 0.33797   2
  -5   8   1 2.46243 1.54961   4
  -5   8   1 0.05590 0.44164   2
   5  -8   1 0.74174 1.02933   6
  -4   8  -1 0.05583 0.45820   2
  -4   8  -1 1.79196 1.47646   4
   4  -8  -1 -0.5426 0.63562   5
   4  -8  -1 0.00231 0.46344   1
  -4   8  -1 0.39301 1.88896   6
   4  -8  -1 -0.4337 0.37334   2
   4  -8   1 -1.3301 0.63921   5
  -4   8   1 0.07468 0.52820   2
  -4   8   1 0.97163 1.55953   4
   4  -8   1 -0.0830 0.49566   1
  -4   8   1 0.14324 1.74938   6
   4  -8   1 -0.0526 0.39147   2
   3  -8  -1 0.08100 0.63678   1
  -3   8  -1 -0.4204 0.47066   2
   3  -8  -1 -0.2065 0.74142   5
   3  -8  -1 0.79888 0.49667   2
  -3   8  -1 -0.3998 1.51318   4
  -3   8  -1 4.02667 2.18320   6
  -3   8   1 0.06874 1.88305   6
   3  -8   1 0.15339 0.42287   2
   3  -8   1 -0.4711 0.64613   5
  -3   8   1 0.01907 0.54625   2
   3  -8   1 0.35258 0.62427   1
  -3   8   1 -0.9926 1.30413   4
   2  -8  -1 -0.3000 0.71824   5
   2  -8  -1 -0.0485 0.67458   1
  -2   8  -1 -0.8290 1.26953   4
  -2   8  -1 0.20590 0.47489   2
  -2   8  -1 1.32746 1.80007   6
   2  -8  -1 -0.0884 0.40318   2
   8   2  -1 0.13386 1.03070   6
  -2   8   1 2.63826 1.82070   4
  -2   8   1 -0.0282 0.57732   2
   2  -8   1 0.17880 0.48466   2
   2  -8   1 0.23648 0.71267   1
  -2   8   1 0.01080 1.69111   6
   2  -8   1 0.06898 0.78686   5
  -8  -2   1 0.03830 1.72799   1
   1  -8  -1 0.09671 0.75228   1
  -1   8  -1 -0.4042 0.55179   2
   8   1  -1 -0.0873 1.12216   6
  -1   8  -1 -0.4879 1.47063   6
   1  -8  -1 0.67521 0.71084   5
  -1   8  -1 0.31159 1.37847   4
   1  -8  -1 0.46180 0.45220   2
   1  -8   1 1.00560 0.55890   2
  -1   8   1 0.15092 1.43698   4
  -1   8   1 2.23940 1.80337   6
  -8  -1   1 0.46138 1.77643   1
   1  -8   1 1.52583 1.13347   1
   1  -8   1 -0.1431 0.68665   5
   0   8  -1 0.26671 1.39400   6
   8   0  -1 0.92839 1.17387   6
   0  -8  -1 -0.1168 0.61967   5
  -8   0  -1 1.13787 2.01106   1
   0   8  -1 1.98554 1.49519   4
   0  -8  -1 0.14318 0.82436   1
   0  -8   1 0.42285 0.70233   5
   0  -8   1 0.31669 0.45909   2
   0   8   1 -0.1521 1.29669   4
   0  -8   1 0.34518 0.84560   1
  -8   0   1 1.04336 2.15941   1
   0   8   1 -0.9451 1.28371   6
   8   0   1 -0.5814 1.14011   6
  -8   1  -1 0.42551 2.03968   1
   1   8  -1 2.39756 1.60298   4
  -1  -8  -1 0.29619 0.42652   5
   8  -1  -1 0.58317 1.16372   6
   1   8  -1 3.31448 1.74165   6
  -1  -8  -1 0.77687 0.94354   1
   8  -1   1 1.64415 1.32503   6
   1   8   1 -0.6965 1.42810   4
  -8   1   1 0.34907 1.83597   1
   1   8   1 0.50607 1.41010   6
  -1  -8   1 0.94113 0.61153   2
  -1  -8   1 0.60872 1.15338   1
  -1  -8   1 1.43251 0.74403   5
   2   8  -1 -0.3111 1.45729   6
  -8   2  -1 -0.0309 1.72143   1
   8  -2  -1 -0.7896 1.18494   6
   2   8  -1 -1.3092 1.28550   4
  -2  -8  -1 -0.1451 0.86266   1
  -2  -8   1 0.35184 1.01139   1
   2   8   1 -0.7302 1.22809   6
  -2  -8   1 -0.3282 0.40790   5
  -8   2   1 -0.1545 1.66794   1
   8  -2   1 0.29619 1.20648   6
   3   8  -1 1.52269 1.48438   6
   3   8  -1 2.54917 1.54037   4
  -8   3  -1 -0.1298 1.56492   1
  -3  -8  -1 0.56735 0.95966   1
   8  -3  -1 -0.2071 1.14340   6
   3   8   1 0.01649 1.51589   6
   8  -3   1 0.94632 1.27831   6
  -8   3   1 -0.0897 0.61094   2
  -8   3   1 0.22719 1.68480   1
   8  -4  -1 0.43516 0.53471   2
   8  -4  -1 -0.5963 1.04423   6
  -8   4  -1 -0.3549 1.32816   1
  -8   4  -1 0.10151 0.52216   2
   4   8  -1 0.51145 1.20870   6
  -8   4   1 -0.5433 1.44721   1
  -8   4   1 0.31478 0.56802   2
   8  -4   1 0.01161 1.16718   6
   5   8  -1 -0.1874 1.10987   6
   8  -5  -1 0.63560 1.08499   6
   8  -5  -1 -0.0330 0.38313   2
  -8   5  -1 -0.1132 0.47936   2
  -8   5  -1 0.77850 1.46203   1
   8  -5   1 1.34754 1.12850   6
  -8   5   1 -0.3682 1.08038   1
  -8   5   1 -0.2488 0.52239   2
   8  -6  -1 0.26793 0.36027   2
  -8   6  -1 -0.3937 1.04208   1
  -8   6  -1 -0.0675 0.41563   2
   8  -6  -1 0.48813 0.88785   6
  -8   6   1 -0.3950 0.41048   2
   8  -6   1 0.31714 0.86069   6
  -8   6   1 0.33910 1.12914   1
   8  -7  -1 -0.4048 0.69180   6
  -8   7  -1 0.67687 0.93695   1
   8  -7  -1 0.10091 0.27911   2
  -8   7  -1 -0.0674 0.34306   2
   8  -7   1 0.04824 0.31543   2
  -8   7   1 -0.5808 0.79525   1
  -8   7   1 0.34385 0.34939   2
   8  -7   1 -0.0147 0.69745   6
   8  -8  -1 0.13329 0.21583   2
  -8   8  -1 0.22114 0.29723   2
  -8   8  -1 -0.4469 0.58604   1
  -8   8   1 0.39423 0.26278   2
   8  -8   1 -0.3526 0.19150   2
   8  -8   1 -0.5408 0.55995   6
   7  -9  -1 0.44762 0.22220   2
  -7   9  -1 -0.0648 0.21727   2
  -7   9   1 0.14644 0.22049   2
   7  -9   1 -0.1212 0.18808   2
  -6   9  -1 -0.3712 0.99437   4
   6  -9  -1 0.01604 0.25125   2
  -6   9  -1 0.05495 0.26439   2
  -6   9   1 -0.2551 0.95322   4
  -6   9   1 -0.3235 0.24176   2
   5  -9  -1 -0.0750 0.36229   1
  -5   9  -1 -0.4362 0.29709   2
  -5   9  -1 -1.4517 1.04167   4
   5  -9  -1 -0.3307 0.28577   2
   5  -9   1 0.03508 0.39547   1
   5  -9   1 0.03479 0.27001   2
  -5   9   1 -0.1703 0.31850   2
  -5   9   1 -1.2536 1.45559   6
  -4   9  -1 0.67484 1.61092   6
   4  -9  -1 0.39968 0.59181   5
  -4   9  -1 0.54958 1.24097   4
  -4   9  -1 0.03543 0.42089   2
   4  -9  -1 -0.0850 0.40621   1
   4  -9   1 0.04650 0.28843   2
   4  -9   1 1.01038 0.69255   5
  -4   9   1 -0.5328 1.28259   4
   4  -9   1 0.32256 0.52236   1
  -4   9   1 0.66349 0.39695   2
  -4   9   1 -0.4552 1.55313   6
  -3   9  -1 -0.8238 1.58783   6
   3  -9  -1 -0.3426 0.55227   5
  -3   9  -1 2.05550 1.33468   4
  -3   9  -1 -0.3196 0.40070   2
   3  -9  -1 -0.1589 0.43301   1
  -3   9   1 -0.9484 1.55928   6
  -3   9   1 -0.9384 0.39670   2
   3  -9   1 0.22897 0.35937   2
  -3   9   1 1.72976 1.38527   4
   3  -9   1 -0.4385 0.38665   1
   3  -9   1 -0.3732 0.54633   5
   9   2  -1 0.74044 0.96526   6
  -2   9  -1 0.57805 1.61335   6
   2  -9  -1 0.20817 0.60228   5
  -2   9  -1 -0.1203 1.20563   4
  -2   9  -1 -0.5755 0.40943   2
   2  -9  -1 0.33926 0.57259   1
  -2   9   1 -0.8814 0.46855   2
   2  -9   1 -0.3364 0.32073   2
  -2   9   1 0.44204 1.60089   6
   2  -9   1 0.37815 0.70864   5
  -9  -2   1 -0.0036 1.47096   1
   2  -9   1 0.18010 0.58266   1
  -2   9   1 -0.2523 1.25679   4
  -1   9  -1 0.11194 1.43107   6
  -1   9  -1 0.25852 1.16118   4
  -1   9  -1 0.33360 0.53859   2
   9   1  -1 1.00374 0.95629   6
   1  -9  -1 0.01377 0.55832   1
   1  -9  -1 0.39692 0.60430   5
  -9  -1   1 -0.3073 1.59477   1
  -1   9   1 0.23247 1.23216   4
   1  -9   1 -0.0336 0.60485   5
  -1   9   1 -0.2648 1.40671   6
   1  -9   1 0.01916 0.34973   2
   1  -9   1 -0.3065 0.50234   1
   0  -9  -1 -0.2424 0.48554   1
   9   0  -1 0.59653 1.09417   6
   0  -9  -1 -0.4622 0.35623   5
   0   9  -1 -0.0857 1.34085   6
  -9   0  -1 -0.6749 1.56606   1
   0   9  -1 2.03899 1.30916   4
   0  -9   1 -0.2746 0.33070   2
   0  -9   1 0.03759 0.78003   1
   0  -9   1 0.35715 0.60314   5
   0   9   1 -1.9223 1.17422   4
   9   0   1 0.79699 0.98825   6
   0   9   1 -1.3413 1.21065   6
  -9   0   1 0.21923 1.71315   1
  -9   1  -1 0.60374 1.76468   1
   9  -1  -1 0.59397 1.10454   6
  -1  -9  -1 0.26501 0.71335   1
   1   9  -1 -0.7838 1.26014   4
   1   9  -1 0.25374 1.22039   6
  -9   1   1 1.42186 2.02735   1
   9  -1   1 0.20961 0.96780   6
   1   9   1 -0.7338 1.26860   4
  -1  -9   1 -0.3119 0.39910   5
  -1  -9   1 -0.4880 0.71905   1
   1   9   1 0.25942 1.25886   6
  -9   2  -1 0.19785 1.58712   1
  -2  -9  -1 0.00464 0.73061   1
   2   9  -1 -0.6305 1.21456   4
   2   9  -1 -0.2477 1.21156   6
   9  -2  -1 0.24190 1.06899   6
   2   9   1 14.0707 2.72573   4
  -2  -9   1 -0.2370 0.77366   1
   9  -2   1 -0.2180 0.96888   6
   2   9   1 -1.1228 1.18082   6
  -9   2   1 0.57073 1.76443   1
  -3  -9  -1 -0.3578 0.64759   1
  -9   3  -1 -0.5745 1.42343   1
   3   9  -1 0.25808 1.16466   6
   3   9  -1 -0.2646 1.13558   4
   9  -3  -1 -0.5219 0.92478   6
  -3  -9   1 -0.0883 0.78059   1
   9  -3   1 0.11134 0.98086   6
  -9   3   1 -0.3304 1.43827   1
   3   9   1 0.00913 1.02123   6
   4   9  -1 -0.6488 1.08314   6
  -9   4  -1 -0.4189 1.12429   1
   9  -4  -1 1.43852 1.06140   6
  -9   4   1 0.06829 1.32434   1
   9  -4   1 -0.8374 0.78203   6
  -4  -9   1 0.26672 0.81274   1
   9  -5  -1 0.12962 0.34473   2
   5   9  -1 -0.8893 0.97901   6
   9  -5  -1 0.18025 0.78932   6
  -9   5  -1 0.66044 1.11738   1
   9  -5   1 -1.0273 0.67311   6
  -9   5   1 1.33905 1.30115   1
  -5  -9   1 -0.4732 0.65087   1
   9  -6  -1 -0.0004 0.69446   6
   9  -6  -1 -0.4500 0.23705   2
  -9   6  -1 -0.2584 0.76767   1
   9  -6   1 0.22339 0.29493   2
  -9   6   1 -0.1067 0.87285   1
   9  -6   1 -0.0006 0.62215   6
  -9   7  -1 -0.1757 0.67000   1
   9  -7  -1 -0.2715 0.18528   2
   9  -7  -1 -0.7781 0.51199   6
  -9   7   1 -0.8277 0.56882   1
   9  -7   1 -0.3454 0.22314   2
   9  -7   1 -0.7976 0.50420   6
  -6  10  -1 -0.3199 0.18932   2
  -6  10   1 -0.1805 0.18352   2
  -5  10  -1 -0.0128 0.22994   2
   5 -10  -1 0.06647 0.27127   1
   5 -10  -1 0.03132 0.19964   2
  -5  10  -1 0.21825 0.83832   4
  -5  10   1 -0.2675 0.78932   4
  -5  10   1 0.01107 0.21678   2
   5 -10   1 0.14453 0.21238   2
  -4  10  -1 0.08762 0.95260   4
   4 -10  -1 -0.1950 0.27884   1
   4 -10  -1 -0.0288 0.22838   2
  -4  10  -1 -1.7375 1.20471   6
  -4  10  -1 0.69326 0.32616   2
  -4  10   1 -0.4031 0.27412   2
   4 -10   1 0.21294 0.38503   1
  -4  10   1 -0.7713 1.21174   6
  -4  10   1 1.50830 1.07429   4
  -3  10  -1 -0.3251 0.34928   2
   3 -10  -1 0.13124 0.35061   1
  -3  10  -1 0.11819 0.99678   4
   3 -10  -1 -0.4034 0.23239   2
  -3  10  -1 -0.8168 1.23417   6
  -3  10   1 0.17830 0.32592   2
  -3  10   1 0.10700 1.00719   4
   3 -10   1 0.28993 0.43799   1
  -3  10   1 0.81843 1.33378   6
   2 -10  -1 -0.3421 0.39264   5
  -2  10  -1 -0.4967 0.99792   4
   2 -10  -1 -0.0860 0.38840   1
  10   2  -1 0.10398 0.79281   6
  -2  10  -1 0.73933 0.44376   2
  -2  10  -1 -0.4313 1.24136   6
 -10  -2   1 -0.5745 1.37296   1
   2 -10   1 0.23055 0.48243   5
   2 -10   1 0.13164 0.45959   1
  -2  10   1 -1.3567 0.37656   2
  -2  10   1 0.85661 1.40368   6
  -2  10   1 0.98756 1.16529   4
  -1  10  -1 -0.1772 1.05414   4
  10   1  -1 -0.0219 0.72187   6
   1 -10  -1 0.26675 0.48338   1
  -1  10  -1 0.32396 0.41614   2
  -1  10  -1 -0.5403 1.20171   6
  -1  10   1 0.28728 1.11034   4
   1 -10   1 -0.2032 0.42532   1
 -10  -1   1 1.23716 1.47230   1
   1 -10   1 0.23574 0.42632   5
  -1  10   1 2.10204 1.49188   6
 -10   0  -1 0.96540 1.52469   1
   0 -10  -1 0.11504 0.46812   1
   0  10  -1 0.63643 1.32748   6
   0  10  -1 -1.1123 0.93123   4
  10   0  -1 -0.4401 0.77223   6
   0  10   1 1.25940 1.27008   6
   0  10   1 -0.3354 1.08016   4
 -10   0   1 0.47514 1.44543   1
  10   0   1 0.00385 0.82287   6
   0 -10   1 -0.1309 0.47963   1
  10  -1  -1 -0.4103 0.79746   6
   1  10  -1 -0.0750 1.04445   4
   1  10  -1 0.65659 1.21781   6
 -10   1  -1 0.45868 1.43441   1
  -1 -10  -1 0.05612 0.48355   1
  -1 -10   1 0.04296 0.53493   1
 -10   1   1 -0.2393 1.31513   1
  10  -1   1 -0.2957 0.72830   6
   1  10   1 1.37738 1.22873   4
   1  10   1 0.65501 1.23438   6
 -10   2  -1 -0.3718 1.23020   1
   2  10  -1 0.26533 0.95234   4
  10  -2  -1 -0.8120 0.74961   6
  -2 -10  -1 -0.0562 0.46497   1
   2  10  -1 -0.6724 0.93317   6
   2  10   1 -0.2069 1.11241   4
  -2 -10   1 -0.2145 0.54601   1
   2  10   1 -1.1061 1.00421   6
  10  -2   1 -0.1782 0.77033   6
 -10   2   1 1.08893 1.53075   1
   3  10  -1 0.53384 1.03768   6
   3  10  -1 0.17283 0.98518   4
  -3 -10  -1 0.41466 0.49944   1
  10  -3  -1 0.15065 0.79257   6
 -10   3  -1 0.15752 1.22481   1
  -3 -10   1 -0.1607 0.55380   1
 -10   3   1 -0.1521 1.10733   1
  10  -3   1 0.51558 0.78442   6
   3  10   1 0.30487 1.03558   6
  10  -4  -1 -0.1442 0.72372   6
 -10   4  -1 -0.2341 0.86266   1
   4  10  -1 0.21394 0.82356   6
 -10   4   1 -0.0386 0.92870   1
  10  -4   1 0.20932 0.65253   6
  -4 -10   1 -0.0654 0.50401   1
   4  10   1 0.21414 1.03708   6
 -10   5  -1 0.07765 0.77984   1
   5  10  -1 0.18558 0.73658   6
  -5 -10   1 0.14093 0.50448   1
  10  -5   1 -0.6259 0.51586   6
 -10   5   1 0.02331 0.79263   1
 -10   6  -1 0.50698 0.64939   1
  10  -6   1 -0.1917 0.46781   6
 -10   6   1 0.13817 0.61040   1
  -4  11   1 -0.0466 0.60751   4
  -3  11  -1 0.91647 0.81627   4
  -3  11  -1 -0.1643 0.22876   2
   3 -11  -1 0.01140 0.25294   1
  -3  11  -1 0.58065 1.09214   6
  -3  11   1 -0.3814 0.71709   4
   3 -11   1 0.04082 0.25252   1
  -3  11   1 -0.4443 0.37135   2
  -3  11   1 -0.0170 0.94882   6
  -2  11  -1 0.40671 0.76627   4
  -2  11  -1 -0.2088 0.29975   2
  -2  11  -1 0.30591 1.03921   6
   2 -11  -1 -0.0341 0.26991   1
  -2  11   1 0.48302 1.05500   6
  -2  11   1 -0.1633 0.78719   4
   2 -11   1 -0.0496 0.29292   1
  -1  11  -1 0.64287 0.86856   4
   1 -11  -1 -0.0444 0.30720   1
  -1  11  -1 0.40854 1.08291   6
  11   1  -1 0.08976 0.59297   6
  -1  11   1 -0.6250 0.78719   4
 -11  -1   1 -0.3766 1.07516   1
  -1  11   1 0.33459 0.93012   6
   1 -11   1 -0.4012 0.26591   1
   0  11  -1 -0.3156 0.83325   4
   0  11  -1 0.73991 0.93072   6
  11   0  -1 0.01821 0.57359   6
   0 -11  -1 -0.2277 0.25332   1
   0  11   1 0.06284 0.83908   4
   0 -11   1 0.08968 0.35602   1
 -11   0   1 0.14718 1.09035   1
  11   0   1 -0.2671 0.50981   6
   0  11   1 -0.9287 0.82056   6
  -1 -11  -1 0.10080 0.33411   1
 -11   1  -1 -0.5327 0.94999   1
   1  11  -1 0.61466 0.86851   6
   1  11  -1 0.32285 0.84378   4
  11  -1  -1 0.09780 0.54353   6
 -11   1   1 0.75213 1.03624   1
  -1 -11   1 -0.1030 0.33747   1
   1  11   1 -0.0171 0.83132   4
  11  -1   1 -0.3058 0.55745   6
   1  11   1 -0.0697 0.83191   6
  11  -2  -1 -0.1542 0.55626   6
 -11   2  -1 0.24716 0.97224   1
  -2 -11  -1 -0.0819 0.29346   1
   2  11  -1 0.29327 0.80253   6
   2  11  -1 1.54328 0.92547   4
   2  11   1 0.38144 0.78819   6
  11  -2   1 0.21020 0.57808   6
 -11   2   1 -0.0710 0.90033   1
  -2 -11   1 0.01414 0.36277   1
 -11   3  -1 0.14961 0.87839   1
  -3 -11  -1 0.06309 0.29574   1
   3  11  -1 -0.0923 0.76080   6
  11  -3  -1 -0.0709 0.47171   6
 -11   3   1 1.58058 0.95170   1
  11  -3   1 0.14001 0.51590   6
  -3 -11   1 -0.0627 0.31400   1
   3  11   1 0.12966 0.76050   6
 -11   4  -1 -0.0229 0.65239   1
  11  -4  -1 0.29692 0.46947   6
 -11   4   1 -0.0345 0.67858   1
  11  -4   1 0.66901 0.55972   6
   0   0   2 39.0617 4.74459   3
   1   0  -2 -2.7295 0.13314   3
   0  -1  -2 -2.8247 0.27693   3
  -1   0   2 -2.3025 0.39931   3
   0   1   2 -2.5265 0.33818   3
   1  -1  -2 39.2184 3.74752   3
  -1  -1   2 37.5943 3.67204   3
  -1   1   2 40.7535 3.82037   3
   1  -2  -2 88.2573 6.97752   3
   2   1  -2 67.6483 6.76192   3
   1  -2   2 68.1860 6.83888   3
  -2  -1   2 73.9808 6.79403   3
  -1   2   2 74.5130 6.93416   3
   0  -2  -2 3574.02 295.967   3
   2   0  -2 3553.38 296.022   3
  -2   0   2 3208.39 296.051   3
   2  -1  -2 72.7670 7.35401   3
  -1  -2  -2 83.6951 7.02891   3
  -2   1   2 75.5118 7.44773   3
   2  -2  -2 130.136 11.5996   3
   2  -2   2 119.833 11.5049   3
  -2   2   2 132.864 11.6444   3
  -2  -2   2 126.447 11.3833   3
   2  -3  -2 105.563 10.9311   5
   2  -3  -2 135.251 10.6532   3
  -2   3   2 120.402 10.5875   3
   2  -3   2 96.0835 10.4225   3
  -3  -2   2 123.843 10.3724   3
   1  -3  -2 86.7118 10.2826   5
   1  -3  -2 123.777 10.0922   3
  -1   3   2 117.557 10.2104   3
   0  -3  -2 -3.7536 0.81798   5
   0  -3  -2 -3.4512 0.50969   3
   0  -3   2 -4.1517 0.48138   3
  -3   0   2 -3.7660 0.71249   3
   3  -1  -2 116.595 10.7196   3
  -1  -3  -2 100.685 10.5764   5
  -1  -3  -2 130.391 10.4842   3
  -1  -3   2 125.054 10.9232   5
  -3   1   2 122.959 10.8275   3
   3  -2  -2 123.948 11.7698   3
  -3   2   2 125.143 11.8039   3
  -2  -3   2 155.222 11.9011   5
  -2  -3   2 123.091 11.5461   3
  -3  -3   2 717.631 61.9464   3
   3  -4  -2 4.56453 1.61702   5
  -4  -3   2 4.58796 1.02399   5
  -4  -3   2 5.98634 1.02752   3
   2  -4  -2 18.3182 2.47528   3
   2  -4  -2 8.26207 2.28552   5
   2  -4   2 19.0983 2.73567   5
  -4  -2   2 20.0736 2.13788   3
   1  -4  -2 14.7248 2.21502   3
   1  -4  -2 19.9498 2.87211   5
  -4  -1   2 20.6491 2.34993   3
   1  -4   2 19.3981 2.71785   5
   0  -4  -2 1240.45 94.9538   3
   0  -4  -2 948.967 95.2140   5
  -4   0   2 1128.98 95.0052   3
   0  -4   2 1158.90 95.4092   5
   0  -4   2 1031.75 94.9370   3
  -1  -4  -2 11.8271 1.64731   3
  -1  -4  -2 15.4733 1.98589   5
  -1  -4   2 18.3040 2.12398   3
  -1  -4   2 18.8932 2.37442   5
  -4   1   2 19.6234 2.34429   3
  -4   2   2 16.8802 2.52062   3
  -2  -4   2 20.2834 2.60467   5
  -2  -4   2 19.9504 2.09110   3
  -2  -4   2 19.2703 2.33746   3
  -3  -4   2 5.20491 1.02603   3
  -3  -4   2 6.03089 1.28565   5
  -3  -4   2 6.00754 1.03842   3
  -4   4  -2 177.800 15.5359   2
   4  -4  -2 182.455 15.5230   2
  -4  -4   2 175.085 15.2382   3
   4  -4   2 164.869 16.9145   6
  -4   4   2 153.371 17.1192   4
  -4  -4   2 176.041 15.2567   3
  -4   4   2 173.800 15.5673   2
  -4   5  -2 10.9334 1.62787   2
   5   4  -2 23.2385 3.40716   6
  -4   5  -2 7.11957 3.87738   6
  -4   5  -2 11.4817 3.05998   4
   4  -5  -2 8.35449 1.99401   1
   4  -5  -2 13.1032 3.05133   6
   4  -5  -2 12.2862 1.60411   2
   4  -5  -2 8.58213 1.97561   5
  -4   5   2 7.62330 3.74722   6
  -4   5   2 7.00692 1.50956   2
   4  -5   2 12.1145 1.65843   2
  -4   5   2 8.56270 3.14568   4
  -5  -4   2 10.2687 1.15820   3
   4  -5   2 8.73501 2.79251   6
  -5  -4   2 9.77247 1.07744   3
  -4   5   2 5.10122 3.46140   1
  -5  -4   2 12.2310 1.31884   5
   4  -5   2 10.5803 2.29213   1
  -3   5  -2 79.1853 9.36228   6
  -3   5  -2 76.3378 7.21603   2
   3  -5  -2 68.5817 7.93416   1
   3  -5  -2 84.3845 7.18354   2
  -3   5  -2 80.4564 8.42266   4
   3  -5  -2 60.2055 7.49277   5
  -3   5   2 79.1304 9.59850   4
  -5  -3   2 75.7374 6.93745   3
  -5  -3   2 89.5188 7.08433   5
  -3   5   2 89.7627 11.3327   6
  -3   5   2 87.3614 7.45161   2
   3  -5   2 74.7586 7.16937   2
   3  -5   2 79.9381 8.89259   6
   2  -5  -2 26.2988 3.49912   5
  -5  -2   2 26.1391 2.58836   3
   2  -5   2 21.4592 3.28142   5
   1  -5  -2 179.466 17.8068   5
   1  -5  -2 213.101 17.5278   3
   1  -5   2 174.132 17.7876   5
  -5  -1   2 215.539 17.4481   3
   0  -5  -2 -0.7255 0.70811   5
   0  -5  -2 0.88419 0.64365   3
   0  -5   2 -0.7811 0.87112   5
  -5   0   2 -0.3740 0.60308   3
  -1  -5  -2 211.422 17.7770   3
  -1  -5  -2 173.562 17.9302   5
  -5   1   2 214.673 18.0669   3
  -1  -5   2 196.833 17.9555   3
  -1  -5   2 231.527 18.3873   5
  -2  -5   2 26.2450 3.04005   3
  -2  -5   2 34.6609 3.50061   5
  -2  -5   2 35.5858 3.20031   3
  -5   3  -2 76.5701 7.36331   2
   5  -3  -2 78.5369 8.65199   6
  -3  -5   2 77.1110 7.18402   3
  -5   3   2 74.0112 7.37562   2
   5  -3   2 83.4791 8.85987   6
  -3  -5   2 78.3099 7.14674   3
  -5   3   2 51.2264 11.4882   4
  -3  -5   2 99.4073 7.56561   5
   4   5  -2 26.5188 3.82438   6
  -5   4  -2 12.1154 1.77533   2
   5  -4  -2 9.42599 1.49853   2
  -5   4  -2 5.40969 3.22694   4
   5  -4  -2 9.68921 1.97827   1
   5  -4  -2 12.1361 2.97347   6
  -5   4   2 5.65774 4.03307   6
  -4  -5   2 11.4504 1.49675   5
  -5   4   2 4.09823 3.52715   1
   5  -4   2 8.18551 1.47386   2
  -5   4   2 6.04309 3.16630   4
  -4  -5   2 12.2677 1.34290   3
  -4  -5   2 11.0386 1.29773   3
  -5   4   2 11.1532 1.71566   2
   5  -4   2 11.7347 3.05525   6
  -5   5  -2 52.2456 7.61699   4
  -5   5  -2 68.4093 6.23784   2
   5  -5  -2 64.1117 7.26386   6
   5  -5  -2 61.9046 6.75890   1
   5  -5  -2 68.8620 6.11810   2
   5  -5   2 61.8988 6.10834   2
  -5   5   2 64.6495 10.0375   6
  -5   5   2 87.8815 6.42357   2
   5  -5   2 68.2799 7.58014   6
  -5   5   2 48.9726 7.82516   4
  -5   6  -2 0.84224 0.65492   2
   5  -6  -2 1.61596 1.45027   6
  -5   6  -2 2.47335 1.95580   4
  -5   6  -2 -0.6496 1.35341   1
   5  -6  -2 0.37549 0.49393   2
   6   5  -2 -0.7036 1.26182   6
   5  -6  -2 0.18856 0.61459   1
   5  -6   2 -1.4698 1.15547   6
  -5   6   2 0.17886 1.95879   1
  -5   6   2 -0.2710 0.52426   2
  -5   6   2 -0.0559 1.80921   4
   5  -6   2 -0.2226 0.40839   2
  -6  -5   2 0.32505 1.67228   1
  -5   6   2 -0.2282 2.69188   6
  -4   6  -2 46.6053 7.04467   4
   4  -6  -2 63.0711 6.73793   1
  -4   6  -2 63.3509 5.96804   2
   4  -6  -2 71.3161 5.94016   2
   4  -6  -2 71.0169 7.16839   6
   4  -6  -2 49.1614 6.23811   5
  -4   6  -2 60.7820 8.64097   6
  -4   6   2 60.1963 9.10298   6
  -4   6   2 67.1951 6.05683   2
   4  -6   2 68.5522 5.94357   2
   4  -6   2 65.1018 7.32000   6
  -4   6   2 59.0393 7.72002   4
   4  -6   2 64.0980 6.76472   1
   3  -6  -2 0.97748 0.94585   1
   3  -6  -2 0.81450 0.55249   2
  -3   6  -2 -0.0922 1.74222   1
  -3   6  -2 0.73696 0.62518   2
  -3   6  -2 -0.9510 1.47383   4
  -3   6  -2 1.91081 2.04175   6
   3  -6  -2 2.40771 1.13484   5
   6   3  -2 0.59328 1.32105   6
  -3   6   2 2.59114 2.17411   4
  -6  -3   2 1.54252 0.36108   5
   3  -6   2 0.86097 0.95225   1
   3  -6   2 1.21029 0.66706   2
  -6  -3   2 2.15324 0.34544   3
   3  -6   2 3.73753 1.97865   6
  -3   6   2 1.46839 0.81938   2
  -6  -3   2 1.77585 0.35477   3
  -6  -3   2 5.43794 2.77799   1
  -3   6   2 1.29622 2.27779   6
  -2   6  -2 201.171 18.6493   2
   2  -6  -2 210.027 18.5915   2
   6   2  -2 244.929 19.6635   6
   2  -6  -2 192.634 19.6197   1
  -2   6  -2 250.089 20.5775   6
  -2   6  -2 253.902 19.9618   4
  -2   6   2 206.596 20.5071   6
   2  -6   2 210.161 18.6697   2
  -2   6   2 229.328 20.0391   4
   2  -6   2 197.324 20.1586   1
  -6  -2   2 223.694 18.5341   5
   2  -6   2 206.398 20.1067   6
  -2   6   2 214.879 18.7719   2
  -6  -2   2 190.423 18.4098   3
  -1   6  -2 8.55874 2.70449   6
   1  -6  -2 5.88592 1.96750   1
   1  -6  -2 5.90589 1.02692   2
  -1   6  -2 10.4375 2.43267   4
  -1   6  -2 4.12907 1.05259   2
   6   1  -2 7.40436 2.24597   6
   1  -6  -2 3.62187 1.30194   5
  -6  -1   2 6.26102 1.07662   3
  -6  -1   2 11.9540 3.95506   1
  -1   6   2 8.58864 2.74674   6
   1  -6   2 4.13531 2.05278   1
   1  -6   2 5.39720 1.47634   5
   1  -6   2 6.62958 1.23787   2
  -1   6   2 8.37969 2.60236   4
   6   0  -2 75.2723 7.78587   6
   0  -6  -2 69.4162 6.97128   5
   0  -6  -2 61.2673 7.92850   1
   0  -6  -2 77.4227 6.69101   2
   0  -6  -2 75.8128 6.69865   3
   0  -6   2 83.2514 6.87794   2
  -6   0   2 73.9586 9.96244   1
  -6   0   2 75.4473 6.75462   3
   0  -6   2 70.0702 7.13237   5
   1   6  -2 13.5104 3.04864   6
  -1  -6  -2 3.92399 0.73085   3
   6  -1  -2 4.18477 2.01376   6
  -1  -6  -2 3.75402 0.95624   5
  -1  -6   2 4.29510 1.26656   5
  -6   1   2 4.75671 3.33454   1
  -6   1   2 4.27411 0.99198   3
  -6   1   2 4.94238 1.04291   2
  -1  -6   2 5.56065 1.12379   2
   6  -2  -2 210.303 18.4097   6
  -6   2  -2 160.605 16.9302   2
  -2  -6   2 227.954 17.0883   2
  -2  -6   2 209.722 17.3951   5
  -6   2   2 180.861 17.1107   2
   6  -2   2 189.097 18.3495   6
  -2  -6   2 175.660 17.0095   3
  -2  -6   2 209.973 17.0087   3
   3   6  -2 2.94247 1.76673   6
   6  -3  -2 1.83489 1.77371   6
  -6   3  -2 1.94865 0.71986   2
  -6   3  -2 -0.0215 1.68967   1
  -3  -6   2 3.89592 2.05647   1
  -6   3   2 0.25202 2.60429   4
   6  -3   2 0.29103 1.69481   6
  -3  -6   2 1.11202 0.45114   3
  -3  -6   2 1.19326 0.72257   5
  -6   3   2 1.96898 0.86058   2
  -6   3   2 -0.0997 2.06539   1
  -3  -6   2 1.48956 0.55958   3
   6  -4  -2 72.6032 7.04162   6
  -6   4  -2 64.1778 5.70854   2
  -6   4   2 66.4190 8.31751   4
  -6   4   2 68.9523 5.82643   2
   6  -4   2 68.0749 7.08989   6
  -4  -6   2 55.4342 5.38135   5
  -6   4   2 37.1776 8.83426   1
  -6   5  -2 0.49117 0.62646   2
   6  -5  -2 0.00118 0.48796   1
   5   6  -2 1.10236 1.54390   6
   6  -5  -2 -0.0027 1.28138   6
  -6   5  -2 -0.4461 1.28337   1
  -6   5   2 0.47157 0.57501   2
   6  -5   2 -0.8346 1.14906   6
  -6   5   2 -1.0945 1.64765   1
  -6   5   2 -0.7828 2.03917   4
  -5  -6   2 -0.7075 1.26444   1
  -6   5   2 1.03172 4.11324   6
   6  -5   2 -0.2592 0.44900   2
  -6   6  -2 49.8908 5.01894   2
   6  -6  -2 57.0114 6.00276   6
   6  -6  -2 56.8709 5.55105   1
  -6   6   2 46.3202 8.51098   1
   6  -6   2 58.4378 6.19675   6
  -6   6   2 54.9966 8.16371   6
   6  -6   2 50.7599 4.94587   2
  -6   6   2 50.5935 6.90803   4
  -6   6   2 52.3700 5.04011   2
  -6   7  -2 1.66574 1.87217   4
  -6   7  -2 -0.6909 1.18907   1
   7   6  -2 -1.1700 1.11863   6
   6  -7  -2 1.76919 1.13024   6
   6  -7  -2 -0.2464 0.44274   1
  -6   7  -2 -0.1166 0.46016   2
   6  -7   2 0.15052 0.34759   2
  -6   7   2 1.70624 1.73175   4
   6  -7   2 0.55268 1.19415   6
  -6   7   2 2.37208 2.48640   6
  -6   7   2 -0.3578 1.36251   1
  -6   7   2 0.27071 0.47569   2
  -7  -6   2 0.54593 1.32579   1
  -5   7  -2 10.6731 1.53480   2
   5  -7  -2 14.0340 2.87052   6
   5  -7  -2 10.1920 1.97295   1
   5  -7  -2 9.22009 1.84401   5
  -5   7  -2 12.2401 2.78960   4
   5  -7   2 14.6813 2.80448   6
   5  -7   2 11.4707 1.51086   2
  -5   7   2 9.40389 3.57227   1
  -5   7   2 11.4016 1.58244   2
  -5   7   2 11.5305 3.50148   6
  -5   7   2 11.7621 3.06345   4
   4  -7  -2 3.01324 1.12136   1
   7   4  -2 3.70800 1.61875   6
   4  -7  -2 0.93510 0.92797   5
  -4   7  -2 0.13776 2.18360   6
  -4   7  -2 2.32529 2.09299   1
   4  -7  -2 2.74016 0.72160   2
  -4   7  -2 0.78995 1.53560   4
  -4   7  -2 1.49417 0.69484   2
  -4   7   2 2.42440 1.96266   4
   4  -7   2 2.32328 1.10565   1
   4  -7   2 2.90012 0.70909   2
  -4   7   2 2.14203 0.84285   2
  -7  -4   2 15.4929 3.72425   1
  -4   7   2 -2.0074 1.93968   6
   4  -7   2 2.49559 1.76286   6
  -3   7  -2 24.7078 2.66438   2
   3  -7  -2 23.9525 3.33169   1
   3  -7  -2 26.0162 2.62038   2
  -3   7  -2 29.3655 5.17436   6
  -3   7  -2 31.4158 4.48182   4
   3  -7  -2 17.2888 3.05346   5
  -3   7   2 23.9769 4.92308   6
  -3   7   2 27.8731 3.03157   2
   3  -7   2 27.9648 3.66206   1
   3  -7   2 26.3120 4.23460   6
   3  -7   2 24.1478 3.34493   5
  -3   7   2 21.7486 4.07982   4
   3  -7   2 27.6020 2.66878   2
   2  -7  -2 6.56458 0.98565   2
  -2   7  -2 8.57400 2.20478   4
   7   2  -2 4.76454 1.66224   6
   2  -7  -2 2.75834 1.13481   5
  -2   7  -2 -1.0405 1.84090   1
  -2   7  -2 5.83581 1.15142   2
   2  -7  -2 4.28938 1.51686   1
  -2   7  -2 7.27476 2.58296   6
   2  -7   2 3.08407 1.16047   5
  -2   7   2 3.00284 2.02231   4
  -2   7   2 4.68174 2.41203   6
   2  -7   2 6.17386 1.09298   2
  -7  -2   2 19.3601 4.42729   1
   2  -7   2 7.73426 2.30359   1
  -2   7   2 5.41187 1.12710   2
  -1   7  -2 1.50978 1.68706   6
   7   1  -2 0.85179 1.37569   6
   1  -7  -2 3.14577 1.00646   5
   1  -7  -2 1.57027 0.60453   2
  -1   7  -2 1.66975 0.76438   2
  -1   7  -2 7.22007 2.12479   4
   1  -7  -2 1.33923 1.05964   1
  -1   7   2 2.07331 1.70659   4
   1  -7   2 3.40413 0.85183   2
  -7  -1   2 1.29020 0.45898   3
   1  -7   2 5.26426 1.32925   5
  -7  -1   2 2.94372 2.52127   1
  -1   7   2 -0.6997 1.46107   6
   1  -7   2 0.69103 1.11909   1
   0  -7  -2 -0.2656 0.42319   3
   0   7  -2 0.14243 1.37285   6
   0  -7  -2 0.30408 0.69539   5
   0  -7  -2 -0.4217 0.41558   2
   0  -7  -2 0.63767 0.99889   1
   0   7  -2 0.59943 1.37106   4
   7   0  -2 0.46134 1.21532   6
   0   7  -2 0.70123 0.61864   2
   0  -7   2 0.15939 0.70969   5
   0   7   2 -0.3395 1.59852   4
  -7   0   2 -1.3625 1.80570   1
   0  -7   2 -0.3605 0.51292   2
  -7   0   2 0.04297 0.84645   2
   0  -7   2 0.01022 1.01784   1
  -7   0   2 0.07377 0.42699   3
   0   7   2 1.18781 1.53700   6
   1   7  -2 0.51703 1.51290   4
  -1  -7  -2 2.28424 0.47261   3
   7  -1  -2 2.15099 1.60376   6
  -1  -7  -2 3.97558 0.51132   3
  -7   1  -2 -0.6192 1.75127   1
  -1  -7  -2 0.93530 0.54474   5
  -1  -7  -2 1.67773 1.31742   1
   1   7  -2 3.14640 1.83960   6
   7  -1   2 2.35776 1.70312   6
  -1  -7   2 1.09596 0.64155   2
  -7   1   2 2.17118 2.37745   1
  -1  -7   2 2.08030 0.90966   5
   1   7   2 2.31490 2.12026   4
   1   7   2 3.56410 1.91137   6
  -7   1   2 1.62789 0.74729   2
   2   7  -2 11.5633 2.45417   4
   7  -2  -2 6.16212 2.13291   6
   2   7  -2 18.5670 3.32438   6
  -2  -7  -2 2.97090 1.64035   1
  -7   2  -2 0.42754 1.94021   1
   2   7   2 15.3477 3.25234   6
  -2  -7   2 4.46393 0.86350   3
   7  -2   2 4.67664 2.05241   6
  -7   2   2 5.32900 1.11215   2
  -7   2   2 4.86317 3.00796   1
  -2  -7   2 6.24298 0.99267   2
  -2  -7   2 6.10909 1.27048   5
   7  -3  -2 26.6454 2.84414   2
  -7   3  -2 23.3921 2.54062   2
   7  -3  -2 32.5952 4.33832   6
   7  -3   2 27.0793 4.20063   6
  -7   3   2 27.1120 2.91393   2
  -3  -7   2 20.5692 2.58083   5
  -7   3   2 23.1841 6.16893   1
  -7   4  -2 0.73411 1.70119   1
   7  -4  -2 2.90789 1.65250   6
  -7   4  -2 2.55724 0.75635   2
   7  -4  -2 1.38274 0.70014   2
   4   7  -2 6.02476 2.08963   6
  -7   4   2 3.66069 0.99815   2
  -7   4   2 0.72703 2.30780   1
   7  -4   2 4.55285 1.88983   6
  -7   5  -2 3.46311 2.28575   1
  -7   5  -2 11.5334 1.43027   2
   7  -5  -2 7.82126 1.28139   2
   7  -5  -2 11.6467 2.42101   6
   7  -5   2 12.1010 2.59322   6
  -7   5   2 12.7110 2.99648   4
  -7   5   2 13.0885 1.64844   2
   7  -5   2 12.9288 1.43358   2
  -7   5   2 7.36335 3.22804   1
   6   7  -2 0.02942 1.19168   6
  -7   6  -2 -0.9948 0.37521   2
   7  -6  -2 0.16226 0.95648   6
   7  -6  -2 -0.4557 0.37531   2
  -7   6  -2 0.27298 1.32969   1
  -7   6   2 -0.1684 0.51533   2
  -7   6   2 -1.2404 1.68351   4
   7  -6   2 0.67899 1.18327   6
   7  -6   2 -0.3429 0.31624   2
  -7   6   2 0.78085 1.56822   1
  -7   7  -2 0.13621 1.03074   1
   7   7  -2 2.10535 1.86433   6
  -7   7  -2 0.87015 0.48303   2
   7  -7  -2 1.45598 1.01407   6
   7  -7  -2 0.59509 0.36581   2
  -7   7   2 1.00392 1.44162   1
   7  -7   2 -0.2334 0.30992   2
   7  -7   2 0.61802 0.91429   6
  -7   7   2 -0.4765 1.32124   4
  -7   7   2 1.49870 0.53717   2
  -7   8  -2 0.09560 0.34192   2
  -7   8  -2 0.31858 0.95021   1
   7  -8  -2 1.01171 0.32670   2
   7  -8   2 1.27803 0.83502   6
  -7   8   2 0.78349 0.38482   2
  -7   8   2 0.18268 1.04870   4
   6  -8  -2 1.40015 0.45765   2
  -6   8  -2 0.33968 1.60575   4
  -6   8  -2 0.71371 1.11345   1
   6  -8  -2 1.35038 0.61202   1
  -6   8  -2 0.60299 0.45953   2
  -6   8   2 1.72685 1.31147   4
  -6   8   2 1.92390 0.53535   2
   6  -8   2 1.38904 0.44719   2
   6  -8   2 1.54998 1.00116   6
  -5   8  -2 0.38738 1.41122   4
  -5   8  -2 0.07939 0.41251   2
   5  -8  -2 0.98423 0.71242   5
   5  -8  -2 0.37488 0.51001   1
  -5   8  -2 0.04355 1.24835   1
   5  -8   2 0.79889 0.41412   2
   5  -8   2 -1.0441 0.91078   6
  -5   8   2 0.36062 2.04742   6
  -5   8   2 0.68453 0.46739   2
  -5   8   2 -0.0340 1.38290   4
   4  -8  -2 26.3629 3.11497   1
  -4   8  -2 25.1356 2.50569   2
  -4   8  -2 13.8969 3.70476   6
   4  -8  -2 17.5517 2.80624   5
  -4   8  -2 21.3794 3.54034   4
   4  -8   2 22.2129 3.42991   6
  -4   8   2 21.5274 3.89906   4
   4  -8   2 26.3440 3.18028   1
  -4   8   2 19.3297 4.41809   6
   4  -8   2 24.2220 2.40507   2
  -4   8   2 25.7112 2.52426   2
  -3   8  -2 1.95413 0.70068   2
  -3   8  -2 0.44055 1.58184   4
   3  -8  -2 1.26649 0.87487   5
   8   3  -2 3.94527 1.50176   6
   3  -8  -2 1.93180 0.98022   1
  -3   8  -2 1.83289 2.00672   6
   3  -8  -2 2.62113 0.67306   2
   3  -8   2 1.66953 0.57747   2
  -3   8   2 1.47450 0.68683   2
   3  -8   2 0.07227 0.73287   5
  -3   8   2 1.68493 1.61090   4
  -3   8   2 0.03238 2.01305   6
  -8  -3   2 7.60013 2.74057   1
   3  -8   2 2.32917 1.12128   1
   2  -8  -2 7.01261 1.50217   5
  -2   8  -2 4.56763 2.26962   6
   2  -8  -2 7.55397 1.89631   1
  -2   8  -2 9.07058 2.31200   4
  -2   8  -2 7.04042 1.29272   2
   8   2  -2 14.8163 2.51995   6
   2  -8  -2 10.7385 1.28682   2
  -2   8   2 7.52647 2.53521   4
  -2   8   2 7.55061 2.70198   6
   2  -8   2 8.48845 2.09843   1
   2  -8   2 5.69502 1.43185   5
  -2   8   2 9.59304 1.69109   2
   2  -8   2 7.81691 1.23116   2
   1  -8  -2 7.99997 2.02970   1
  -1   8  -2 8.75180 2.22095   4
  -1   8  -2 9.72553 1.42350   2
   1  -8  -2 6.42867 1.34827   5
  -1   8  -2 11.8085 3.06638   6
   1  -8   2 6.44862 1.49774   5
   1  -8   2 6.10331 2.03588   1
  -1   8   2 4.32776 2.39220   6
   1  -8   2 8.62060 1.23994   2
  -8  -1   2 25.4239 5.15509   1
  -1   8   2 7.50650 2.41076   4
   8   0  -2 2.86402 1.49488   6
   0  -8  -2 0.93929 0.63021   5
   0  -8  -2 1.73261 1.07360   1
   0   8  -2 2.74269 1.76741   6
   0   8  -2 2.50551 1.74629   4
   0  -8   2 1.46312 0.79363   5
   0  -8   2 0.72020 1.18190   1
  -8   0   2 2.86716 2.37331   1
   0  -8   2 1.62542 0.64243   2
   0   8   2 2.40406 1.85245   4
   0   8   2 1.52574 1.69579   6
  -8   1  -2 2.77618 2.33507   1
   1   8  -2 15.0773 2.81204   4
   1   8  -2 17.4511 3.29946   6
  -1  -8  -2 8.87624 2.25442   1
   8  -1  -2 10.3392 2.39911   6
  -1  -8   2 8.59938 1.10367   2
   1   8   2 12.9029 2.94237   6
  -1  -8   2 7.09489 1.39339   5
   8  -1   2 5.91979 1.91914   6
  -1  -8   2 3.29390 1.75086   1
   1   8   2 12.7106 2.68874   4
  -8   1   2 13.5471 4.13742   1
  -2  -8  -2 8.13742 2.24189   1
  -8   2  -2 2.66271 2.42563   1
   2   8  -2 27.9909 3.42303   4
   2   8  -2 20.3992 3.41481   6
   8  -2  -2 10.6533 2.36170   6
  -8   2   2 7.76649 1.21563   2
  -2  -8   2 3.14949 1.74398   1
  -2  -8   2 3.99764 0.96600   5
   8  -2   2 8.04212 2.24546   6
  -8   2   2 9.52731 3.78100   1
   2   8   2 9.82304 2.52045   6
   3   8  -2 3.29057 1.78588   6
  -8   3  -2 1.30936 1.75040   1
   8  -3  -2 0.67153 1.20383   6
   3   8  -2 5.75165 1.91898   4
   8  -3   2 1.69178 1.47117   6
  -8   3   2 0.16260 1.74126   1
  -8   3   2 0.05470 0.66521   2
   8  -4  -2 24.9279 2.77196   2
   8  -4  -2 28.7307 3.84592   6
   8  -4   2 30.3271 4.30283   6
  -8   4   2 26.2142 5.75473   1
  -8   4   2 30.9887 2.93857   2
  -8   5  -2 -0.4310 1.15596   1
   8  -5  -2 -0.1971 0.95576   6
   8  -5  -2 1.03237 0.47875   2
   5   8  -2 2.03986 1.41938   6
  -8   5   2 2.08964 0.65253   2
   8  -5   2 0.06125 1.06295   6
  -8   5   2 0.21644 1.54803   1
   8  -6  -2 1.23983 0.99900   6
  -8   6  -2 0.74125 1.08230   1
   6   8  -2 5.66577 1.66899   6
   8  -6  -2 1.82107 0.50146   2
  -8   6  -2 0.51628 0.44458   2
   8  -6   2 2.01129 1.08675   6
  -8   6   2 0.87303 1.43900   1
  -8   6   2 1.33823 0.56995   2
  -8   7  -2 -0.1740 0.88752   1
  -8   7  -2 0.21739 0.34782   2
   8  -7  -2 1.02185 0.80831   6
   8  -7  -2 0.62067 0.33478   2
  -8   7   2 0.76652 0.39098   2
  -8   7   2 1.16100 1.06259   1
   8  -7   2 0.98754 0.83909   6
   8  -8  -2 3.52625 0.47363   2
  -8   8  -2 2.01182 1.07968   1
   8  -8   2 3.83242 0.55206   2
   8  -8   2 3.47298 0.85115   6
  -8   8   2 3.46876 0.50488   2
   7  -9  -2 5.90948 0.72840   2
  -7   9  -2 6.14743 0.75867   2
  -7   9   2 9.61232 0.82787   2
   7  -9   2 6.45691 0.77436   2
  -6   9  -2 0.16640 0.27509   2
   6  -9  -2 -0.0372 0.23658   2
  -6   9   2 0.14633 0.29917   2
  -6   9   2 0.74742 0.96433   4
   5  -9  -2 10.9997 1.13495   2
   5  -9  -2 9.65356 1.37624   1
  -5   9  -2 10.3569 1.23268   2
  -5   9  -2 6.30729 1.82180   4
  -5   9   2 8.02073 2.44461   6
  -5   9   2 4.03312 1.62628   4
  -5   9   2 8.84491 1.16871   2
   5  -9   2 8.45698 1.03901   2
   4  -9  -2 -0.4165 0.56312   5
   4  -9  -2 0.39960 0.36607   2
   9   4  -2 1.75561 1.04746   6
   4  -9  -2 0.44923 0.48066   1
  -4   9  -2 0.48097 1.25322   4
  -4   9  -2 0.03122 0.41117   2
  -4   9  -2 0.64168 1.66146   6
  -4   9   2 1.22917 0.53163   2
   4  -9   2 1.28099 0.67239   5
  -4   9   2 -1.0432 1.54588   6
   4  -9   2 1.00904 0.70081   1
  -4   9   2 1.04795 1.30773   4
   4  -9   2 0.76670 0.37857   2
  -3   9  -2 0.10320 1.28236   4
   3  -9  -2 1.23951 0.77544   1
   3  -9  -2 0.86538 0.65215   5
  -3   9  -2 2.70025 1.86724   6
   3  -9  -2 1.90351 0.52582   2
  -3   9  -2 1.82296 0.62015   2
   9   3  -2 4.94312 1.42995   6
   3  -9   2 1.30729 0.87006   1
  -3   9   2 2.33768 1.87998   6
  -9  -3   2 7.70322 2.54676   1
  -3   9   2 2.25224 0.66218   2
   3  -9   2 1.42521 0.48772   2
  -3   9   2 1.13947 1.42057   4
   3  -9   2 0.16303 0.65443   5
  -2   9  -2 2.27378 1.42455   4
   9   2  -2 4.12330 1.32492   6
   2  -9  -2 2.72596 0.80921   5
   2  -9  -2 3.37670 0.60602   2
  -2   9  -2 2.48657 0.70222   2
   2  -9  -2 1.97467 0.89395   1
  -2   9  -2 1.84945 1.74204   6
   2  -9   2 2.05379 1.05341   1
  -2   9   2 2.89124 1.99919   6
  -2   9   2 0.99655 1.43883   4
  -9  -2   2 10.8084 3.06852   1
   2  -9   2 0.84743 0.67132   5
   2  -9   2 1.78995 0.52549   2
  -1   9  -2 15.2872 1.94256   2
  -1   9  -2 16.6767 3.30916   6
   1  -9  -2 13.9585 1.84654   5
   1  -9  -2 15.7467 2.69136   1
  -1   9  -2 19.1842 3.12065   4
   1  -9   2 18.5792 3.12854   1
  -1   9   2 19.8898 3.65428   6
   1  -9   2 12.9313 2.03301   5
  -1   9   2 17.2817 3.21030   4
   1  -9   2 15.9748 1.76691   2
   0  -9  -2 -0.0538 0.57803   1
   0   9  -2 -0.5102 1.19277   6
   0   9  -2 -0.4566 1.16896   4
   9   0  -2 0.47069 0.98150   6
   0  -9   2 0.08361 0.57066   5
   0   9   2 0.10048 1.38967   6
  -9   0   2 -0.3053 1.46729   1
   0  -9   2 -0.0786 0.33419   2
   0  -9   2 0.39561 0.89526   1
   0   9   2 -0.2933 1.36715   4
   1   9  -2 26.2750 3.76178   6
   1   9  -2 29.1885 3.63169   4
   9  -1  -2 24.9472 3.44932   6
  -1  -9  -2 17.0760 2.58901   1
  -9   1  -2 14.2923 4.15745   1
  -1  -9   2 15.6735 3.28945   1
   9  -1   2 16.4724 2.74736   6
  -1  -9   2 10.4083 1.79612   5
   1   9   2 21.7820 3.70842   6
   1   9   2 20.3281 3.20488   4
  -2  -9  -2 2.41266 1.17574   1
   9  -2  -2 2.41595 1.39613   6
   2   9  -2 5.73877 1.85615   4
  -9   2  -2 0.84271 1.78227   1
   2   9  -2 5.86494 1.92069   6
  -2  -9   2 1.41432 1.23847   1
   2   9   2 4.39005 1.81260   6
   9  -2   2 3.57932 1.44994   6
  -9   2   2 4.07820 2.40425   1
  -3  -9  -2 1.56535 1.09075   1
   9  -3  -2 3.45639 1.43604   6
   3   9  -2 2.56427 1.39719   4
   3   9  -2 2.93523 1.68546   6
  -9   3  -2 1.76428 1.71989   1
   9  -3   2 1.68549 1.16116   6
  -3  -9   2 1.18646 1.05298   1
  -9   3   2 1.38388 1.86934   1
   3   9   2 3.00789 1.60315   6
   4   9  -2 -0.1013 1.20829   6
   4   9  -2 -0.6979 1.09764   4
  -9   4  -2 -0.2181 1.22251   1
   9  -4  -2 -1.0759 0.84716   6
   9  -4  -2 0.87151 0.45902   2
   9  -4   2 -0.0973 0.83836   6
  -9   4   2 1.65789 1.59562   1
  -4  -9   2 0.73424 0.94504   1
  -9   5  -2 3.95682 1.96753   1
   9  -5  -2 8.28922 1.07341   2
   9  -5  -2 10.7008 1.77200   6
  -9   5   2 15.1709 3.08563   1
  -9   5   2 10.6295 1.14583   2
  -5  -9   2 6.83921 1.81893   1
   9  -5   2 13.1872 2.01837   6
   9  -6  -2 0.69279 0.73555   6
   6   9  -2 -1.8269 0.71712   6
  -9   6  -2 -0.0229 0.79194   1
   9  -6  -2 0.33851 0.28488   2
   9  -6   2 -0.3470 0.66512   6
  -6  -9   2 -0.0935 0.55682   1
  -9   6   2 -0.4018 0.79658   1
  -9   6   2 1.04041 0.38937   2
  -9   7  -2 5.60155 1.42569   1
   9  -7  -2 7.30201 0.77460   2
   9  -7   2 5.83907 1.05977   6
   5 -10  -2 0.07886 0.26177   1
  -5  10  -2 0.20325 0.90493   4
   5 -10  -2 -0.1594 0.17990   2
  -5  10  -2 -0.0626 0.23244   2
  -5  10   2 0.07870 0.74860   4
  -5  10   2 1.39181 1.20674   6
  -5  10   2 -0.3231 0.22486   2
  -4  10  -2 4.42950 1.97604   6
   4 -10  -2 4.47092 0.64548   2
  -4  10  -2 4.90829 1.33389   4
  -4  10  -2 5.66699 0.78455   2
   4 -10  -2 5.46463 1.05892   1
  -4  10   2 4.30865 1.74261   6
  -4  10   2 3.71683 1.37093   4
   4 -10   2 6.12870 1.12860   1
  -4  10   2 4.63969 0.73935   2
  -3  10  -2 -0.4735 0.92538   4
  -3  10  -2 0.09452 0.37138   2
   3 -10  -2 0.20607 0.38122   1
  -3  10  -2 -0.3391 1.37803   6
  10   3  -2 0.70324 0.81369   6
 -10  -3   2 1.26520 1.31582   1
   3 -10   2 0.13253 0.24520   2
   3 -10   2 0.77290 0.54223   1
  -3  10   2 0.01851 0.38624   2
  -3  10   2 -0.9085 0.95247   4
  -3  10   2 1.18228 1.37313   6
  -2  10  -2 2.75178 0.65473   2
  -2  10  -2 4.65560 1.76383   6
  -2  10  -2 4.31018 1.54865   4
   2 -10  -2 3.54498 0.99595   1
  10   2  -2 7.44061 1.54544   6
  -2  10   2 3.73050 1.47550   4
   2 -10   2 3.95210 1.10633   1
   2 -10   2 3.27352 0.52713   2
  -2  10   2 5.73864 2.02533   6
  10   1  -2 4.77655 1.27425   6
   1 -10  -2 1.72995 0.77821   1
  -1  10  -2 0.78278 1.40413   6
  -1  10  -2 1.65100 0.52192   2
  -1  10  -2 2.33711 1.37826   4
  -1  10   2 2.45018 1.64124   6
   1 -10   2 2.34644 0.95517   1
   1 -10   2 1.05679 0.56528   5
  -1  10   2 0.75954 1.13697   4
   1 -10   2 1.70495 0.38120   2
 -10  -1   2 10.7564 2.86272   1
   0 -10  -2 117.103 11.6445   1
   0  10  -2 140.944 12.4444   6
   0  10  -2 134.682 11.9278   4
   0  10   2 124.312 12.3506   6
   0  10   2 121.104 11.9306   4
   0 -10   2 129.642 11.9712   1
  -1 -10  -2 2.37806 0.89023   1
  10  -1  -2 0.99372 0.92486   6
   1  10  -2 2.60042 1.20059   4
 -10   1  -2 1.81703 1.71558   1
   1  10  -2 1.65704 1.29073   6
  10  -1   2 1.56000 0.97482   6
   1  10   2 1.17222 1.29137   4
  -1 -10   2 1.42083 0.91943   1
 -10   1   2 5.37912 2.44257   1
   1  10   2 2.33785 1.43198   6
  -2 -10  -2 4.71416 1.26622   1
   2  10  -2 8.17063 1.69725   4
 -10   2  -2 5.77391 2.36052   1
   2  10  -2 3.65648 1.55843   6
 -10   2   2 12.9807 3.28605   1
   2  10   2 6.30356 1.82300   6
  10  -2   2 6.47122 1.43764   6
  -2 -10   2 5.72101 1.62740   1
   3  10  -2 1.81971 1.16728   4
   3  10  -2 -0.5301 0.85840   6
  -3 -10  -2 0.47832 0.56038   1
 -10   3  -2 -0.3726 1.03188   1
  10  -3  -2 -0.2350 0.77681   6
 -10   3   2 0.85855 1.25266   1
   3  10   2 0.18450 1.05835   6
  10  -3   2 0.66114 0.77688   6
  -3 -10   2 0.08922 0.62034   1
   4  10  -2 11.0881 1.99622   6
 -10   4  -2 6.68879 2.14709   1
 -10   4   2 12.4035 2.64573   1
  10  -4   2 7.06369 1.40313   6
  -4 -10   2 6.04431 1.54392   1
   5  10  -2 -0.0996 0.68502   6
  10  -5  -2 -0.1595 0.55125   6
  10  -5  -2 0.22435 0.24586   2
 -10   5  -2 -0.4022 0.70264   1
  -5 -10   2 -0.1992 0.46375   1
 -10   5   2 0.06780 0.72129   1
  10  -5   2 -0.4644 0.51398   6
 -10   6  -2 23.6096 2.88706   1
  10  -6   2 22.4687 2.43333   6
  -3  11  -2 1.93595 0.39209   2
  -3  11  -2 1.77932 0.88200   4
   3 -11  -2 2.31623 0.57229   1
  -3  11  -2 1.25733 1.46461   6
  -3  11   2 1.62915 1.13214   6
  -3  11   2 1.06063 0.83431   4
   3 -11   2 1.89947 0.56251   1
  11   2  -2 1.46939 0.69758   6
   2 -11  -2 0.39418 0.32840   1
  -2  11  -2 0.77513 0.81363   4
  -2  11  -2 -0.4700 0.27231   2
  -2  11  -2 0.15031 1.03872   6
   2 -11   2 0.79025 0.44904   1
 -11  -2   2 3.86416 1.46320   1
  -2  11   2 0.14028 0.78891   4
  -2  11   2 0.70803 1.05839   6
  -1  11  -2 15.3577 2.70363   6
  -1  11  -2 17.4735 2.33343   4
   1 -11  -2 15.6998 1.88783   1
  -1  11  -2 15.6486 1.65380   2
  -1  11   2 14.8796 2.26830   4
  -1  11   2 15.8612 2.74486   6
   1 -11   2 17.5320 1.99374   1
  11   0  -2 0.91104 0.67865   6
   0  11  -2 0.31896 0.83002   4
   0 -11  -2 0.04981 0.31822   1
   0  11  -2 -0.9017 0.75808   6
 -11   0   2 -0.7225 0.80367   1
   0  11   2 -0.2541 0.92508   6
   0 -11   2 -0.0723 0.36122   1
   0  11   2 -0.3155 0.84912   4
   1  11  -2 20.2670 2.47654   4
   1  11  -2 15.5565 2.56715   6
  -1 -11  -2 16.0388 1.97363   1
   1  11   2 20.8202 2.51358   4
   1  11   2 19.5499 2.94458   6
  -1 -11   2 17.9252 2.14917   1
  -2 -11  -2 0.67092 0.44265   1
  11  -2  -2 1.14600 0.63413   6
   2  11  -2 0.79135 0.92011   6
 -11   2  -2 2.09874 1.28724   1
   2  11  -2 0.22230 0.81822   4
 -11   2   2 2.94558 1.34687   1
   2  11   2 1.57449 1.01494   6
  11  -2   2 0.10011 0.58182   6
  -2 -11   2 0.69413 0.53316   1
  11  -3  -2 1.01934 0.57726   6
   3  11  -2 4.46782 1.24104   6
 -11   3  -2 3.55282 1.34293   1
 -11   3   2 6.99687 1.75112   1
  11  -3   2 1.00948 0.66120   6
  11  -4  -2 -0.0102 0.65099   6
 -11   4   2 -0.0374 0.59036   1
   0   0   3 -4.0785 0.30303   3
   0  -1  -3 -0.3348 0.35957   3
   1   0  -3 0.48422 0.51759   3
  -1   0   3 0.03537 0.47048   3
   1  -1  -3 0.16942 0.48926   3
  -1  -1   3 -0.6741 0.42827   3
  -1   1   3 0.36893 0.60191   3
   2   1  -3 25.0521 2.34243   3
   1  -2  -3 22.2282 2.34112   3
  -2  -1   3 19.9224 2.28759   3
   1  -2   3 24.2442 2.40854   3
  -1   2   3 21.4953 2.66363   3
   0  -2  -3 -1.9581 0.41178   3
   2   0  -3 -2.3027 0.41522   3
  -2   0   3 -2.0305 0.58131   3
   2  -1  -3 21.6776 2.36050   3
  -1  -2   3 25.6665 2.36548   3
  -2   1   3 20.5603 2.66580   3
   2  -2  -3 0.25971 0.56984   3
  -2   2   3 -0.7431 0.58330   3
  -2  -2   3 0.58200 0.45633   3
   2  -3  -3 7.25450 1.82601   5
   2  -3  -3 13.3696 1.79678   3
  -3  -2   3 5.98749 1.11764   3
   1  -3  -3 0.35884 0.94611   5
   1  -3  -3 -0.0285 0.56654   3
  -3  -1   3 0.14437 0.54329   3
   1  -3   3 -0.3895 0.51897   3
   0  -3  -3 -0.0846 0.67576   5
   3   0  -3 -0.1629 0.39589   3
   0  -3  -3 -0.4230 0.36880   3
  -3   0   3 0.05227 0.64577   3
   0  -3   3 -0.9300 0.43622   3
  -1  -3  -3 -0.3475 0.32957   5
  -1  -3  -3 0.18145 0.21005   3
   3  -1  -3 -0.4476 0.43304   3
  -3   1   3 0.20616 0.65102   3
  -1  -3   3 -0.3513 0.60786   5
  -2  -3   3 9.90571 1.53980   5
  -2  -3   3 6.36250 1.11745   3
  -3   2   3 13.9776 1.91747   3
   3  -3  -3 -1.3542 0.99072   5
  -3  -3   3 -0.1730 0.62144   5
  -3  -3   3 -0.1544 0.49069   3
   3  -4  -3 2.37666 1.28422   5
  -4  -3   3 2.37469 0.82287   5
  -4  -3   3 2.32008 0.73556   3
   2  -4  -3 -0.6547 0.87937   5
   2  -4  -3 -0.4251 0.60121   3
  -4  -2   3 0.75130 0.67157   3
   1  -4  -3 4.87234 1.43503   5
   1  -4  -3 3.82502 0.91922   3
   1  -4   3 3.85651 1.27328   5
  -4  -1   3 3.49126 0.94819   3
   0  -4  -3 0.14919 0.44262   3
   0  -4  -3 0.72846 0.79711   5
   0  -4   3 -0.1349 0.69352   5
  -4   0   3 -0.0166 0.69437   3
   0  -4   3 -0.2182 0.57384   3
  -1  -4  -3 5.07702 0.87159   5
  -1  -4  -3 4.65201 0.65811   3
  -1  -4  -3 7.39283 0.86802   5
  -1  -4   3 4.70834 0.99516   3
  -1  -4   3 4.66084 1.26205   5
  -4   1   3 4.17667 1.12962   3
  -2  -4   3 0.67945 0.53960   3
  -2  -4   3 -0.6287 0.53681   3
  -2  -4   3 0.50828 0.81475   5
  -3  -4   3 2.77545 0.93059   5
  -3  -4   3 2.40564 0.73479   3
  -4   4  -3 -0.4928 0.60567   2
   4  -4  -3 0.22694 0.67252   1
   4  -4  -3 -0.2972 1.66203   6
   4  -4  -3 0.65227 1.00915   5
   4  -4  -3 0.20216 0.58408   2
  -4   4  -3 0.87228 2.22639   1
  -4   4   3 1.32988 3.06616   6
   4  -4   3 -1.0397 1.73270   6
  -4  -4   3 0.40727 0.56202   5
  -4   4   3 0.60215 2.81798   1
  -4  -4   3 -0.3181 0.41675   3
  -4   4   3 -0.7803 2.57716   4
  -4   4   3 0.04093 0.83735   2
   5   4  -3 4.25551 1.91232   6
  -4   5  -3 -0.2921 1.99010   4
   4  -5  -3 2.77923 1.80809   6
   4  -5  -3 1.07200 0.98475   5
  -4   5  -3 0.84365 1.94798   1
   4  -5  -3 0.95709 0.87394   1
  -4   5  -3 1.44517 0.81141   2
   4  -5  -3 2.46559 0.74772   2
  -5  -4   3 5.86341 2.64602   1
  -5  -4   3 0.89510 0.51031   3
  -4   5   3 3.85025 2.60656   4
   4  -5   3 2.44819 0.77353   2
   4  -5   3 0.98740 1.87380   6
  -4   5   3 2.21427 3.26144   6
  -5  -4   3 2.69534 0.68616   5
  -4   5   3 0.96457 2.46590   1
  -5  -4   3 2.37507 0.54342   3
  -4   5   3 2.64830 0.86677   2
   3  -5  -3 -0.0990 0.65204   1
   5   3  -3 1.07770 1.89291   6
   3  -5  -3 0.28285 0.53250   2
  -3   5  -3 -1.4653 1.51813   4
   3  -5  -3 -0.8008 0.79132   5
  -3   5  -3 -0.2203 2.39462   6
  -3   5  -3 -0.0808 0.58332   2
  -3   5  -3 1.27242 1.94645   1
   3  -5   3 0.65636 1.67947   6
  -3   5   3 0.26785 0.77103   2
  -5  -3   3 -0.3702 0.43014   3
  -5  -3   3 -0.1125 2.88335   1
  -3   5   3 2.47831 2.19734   4
  -3   5   3 -0.4392 2.61746   6
  -5  -3   3 -0.4980 0.41344   5
   3  -5   3 -0.3653 0.54896   2
   3  -5   3 -0.2966 1.11505   1
   2  -5  -3 9.77433 1.44051   2
   2  -5  -3 9.74642 1.88893   5
  -5  -2   3 7.18488 1.32139   3
   2  -5   3 10.1919 1.87424   5
   1  -5  -3 -0.2123 0.47778   3
   1  -5  -3 -0.9659 0.65297   5
   1  -5   3 -0.8570 0.63935   5
  -5  -1   3 0.16976 0.63821   3
   0  -5  -3 -0.6028 0.34464   3
   0  -5  -3 -0.0426 0.72854   5
  -5   0   3 -0.3643 0.60082   3
   0  -5   3 0.15175 0.79446   5
  -1  -5  -3 0.23021 0.50882   5
  -1  -5  -3 0.17841 0.26498   3
  -1  -5   3 0.40122 0.79234   5
  -5   2   3 10.8429 1.68897   2
  -2  -5   3 12.0438 1.73486   5
  -2  -5   3 7.72830 1.26829   3
  -2  -5   3 8.15374 1.26429   3
  -5   3  -3 0.03127 1.96610   1
   5  -3  -3 0.91135 1.71362   6
   3   5  -3 -0.0843 1.66864   6
  -5   3  -3 0.45044 0.74267   2
  -3  -5   3 0.42038 0.47219   3
  -5   3   3 3.07334 2.47476   4
   5  -3   3 1.14701 1.85277   6
  -5   3   3 -2.1328 3.69252   6
  -3  -5   3 -0.0738 0.59832   2
  -3  -5   3 -0.0698 0.44323   3
  -5   3   3 -0.6265 0.64055   2
  -3  -5   3 0.59635 1.81566   1
  -3  -5   3 -0.2465 0.51842   5
  -5   3   3 -1.8704 2.28515   1
  -5   4  -3 0.83640 1.88537   1
   5  -4  -3 4.74583 1.90039   6
  -5   4  -3 2.87583 0.96090   2
   4   5  -3 7.22825 2.30819   6
   5  -4  -3 2.20152 0.98515   1
  -5   4   3 1.38049 0.77996   2
  -5   4   3 0.46230 3.26541   6
   5  -4   3 1.14975 1.73774   6
  -4  -5   3 1.59475 0.52603   3
  -4  -5   3 3.34229 2.05249   1
  -4  -5   3 1.57499 0.53101   3
  -4  -5   3 2.21144 0.75988   5
  -5   4   3 0.02475 2.70366   1
  -5   4   3 -0.8272 2.42034   4
   5   5  -3 0.47128 1.36370   6
  -5   5  -3 -1.8151 2.10086   4
  -5   5  -3 -1.4756 0.46395   2
   5  -5  -3 1.21692 1.52904   6
   5  -5  -3 0.18909 0.56332   1
  -5   5  -3 0.15754 1.50617   1
   5  -5   3 1.48493 1.51246   6
  -5   5   3 0.36423 2.41717   1
  -5  -5   3 -0.2529 1.59499   1
  -5   5   3 1.25236 0.73437   2
  -5   5   3 -0.4009 2.22821   4
  -5  -5   3 -0.3518 0.33923   5
  -5   5   3 -2.6329 2.68335   6
   5  -5   3 -0.4802 0.46812   2
   5  -6  -3 -0.1060 0.56083   1
   5  -6  -3 0.25672 0.96811   5
  -5   6  -3 -2.8540 1.68433   4
   6   5  -3 0.65934 1.38936   6
  -5   6  -3 0.27627 1.57610   1
  -5   6  -3 0.32276 0.53557   2
   5  -6  -3 -0.3201 1.22714   6
  -6  -5   3 -0.0688 1.50833   1
  -5   6   3 0.04911 0.59447   2
   5  -6   3 -1.0846 1.26635   6
  -5   6   3 -0.1796 1.76175   1
  -5   6   3 -2.1479 1.72633   4
   5  -6   3 0.07914 0.46063   2
  -5   6   3 -1.5442 2.54743   6
  -4   6  -3 -0.0441 0.48513   2
  -4   6  -3 -0.2141 1.65475   1
  -4   6  -3 0.59637 1.68377   4
   4  -6  -3 0.53655 0.71673   1
   6   4  -3 -0.8193 1.18995   6
   4  -6  -3 0.61680 0.52857   2
  -4   6  -3 -3.5738 2.28381   6
   4  -6  -3 -0.8084 1.41960   6
   4  -6  -3 0.40738 0.84483   5
   4  -6   3 0.19521 1.38780   6
  -6  -4   3 -0.0718 0.28345   5
  -6  -4   3 -0.7131 1.44842   1
  -4   6   3 -2.0205 2.34758   6
  -4   6   3 0.67050 2.26624   1
  -4   6   3 -2.8189 1.55128   4
   4  -6   3 -0.0870 0.73440   1
   4  -6   3 -0.5696 0.47118   2
  -4   6   3 0.34305 0.61839   2
  -3   6  -3 0.68722 0.65379   2
  -3   6  -3 -0.8769 1.85322   6
  -3   6  -3 0.15154 1.83047   1
   6   3  -3 0.11246 1.25832   6
  -3   6  -3 2.19518 1.79514   4
   3  -6  -3 0.61182 0.55447   2
   3  -6  -3 1.26353 0.88301   5
   3  -6  -3 0.79841 0.79724   1
  -3   6   3 1.55520 1.71628   4
  -6  -3   3 2.63762 2.10645   1
  -6  -3   3 0.41505 0.40501   3
   3  -6   3 0.30722 0.90132   1
   3  -6   3 0.19520 1.67266   6
  -6  -3   3 1.44648 0.52328   5
   3  -6   3 0.19765 0.47094   2
  -3   6   3 -0.4953 0.60605   2
  -3   6   3 1.71306 2.55858   6
   2  -6  -3 -0.2450 0.46482   2
  -2   6  -3 0.48354 1.75543   1
   6   2  -3 0.35804 1.35801   6
  -2   6  -3 0.31033 0.60393   2
   2  -6  -3 -0.6355 0.74721   5
  -2   6  -3 0.35627 1.63508   4
  -2   6  -3 1.47944 1.76191   6
   2  -6  -3 0.28743 0.75500   1
  -6  -2   3 -0.4780 0.81104   2
  -6  -2   3 0.19636 2.07401   1
  -2   6   3 0.74505 1.88640   4
   2  -6   3 -0.4545 0.49862   2
  -2   6   3 1.10123 2.12111   6
   2  -6   3 0.80438 1.94209   6
   2  -6   3 -0.6452 0.77185   5
   2  -6   3 -0.4918 0.99010   1
  -6  -2   3 0.06095 0.46414   3
  -1   6  -3 2.93301 1.73487   4
   1  -6  -3 3.06951 1.09206   5
  -1   6  -3 1.57430 0.63844   2
   1  -6  -3 2.51755 0.66991   2
  -1   6  -3 0.79835 2.14557   1
  -1   6  -3 3.92206 1.93220   6
   1  -6  -3 1.52219 1.06401   1
  -1   6   3 -3.1662 1.86201   4
  -6  -1   3 1.02159 2.38688   1
  -1   6   3 1.67727 2.14278   6
   1  -6   3 1.99714 0.74823   2
   1  -6   3 0.69306 0.83246   5
   1  -6   3 -0.2842 1.14434   1
  -6  -1   3 1.63571 0.67123   3
  -6  -1   3 2.30309 0.69803   2
   1  -6   3 2.91578 2.27152   6
   0   6  -3 -0.6206 0.53285   2
   0  -6  -3 -0.0317 0.34915   3
   0   6  -3 -1.7108 1.36093   4
   0  -6  -3 -0.6846 0.85064   1
   0  -6  -3 -0.3650 0.56562   5
   6   0  -3 0.60145 1.42288   6
   0   6  -3 -0.3973 1.45267   6
  -6   0   3 -0.4294 0.61596   2
   0  -6   3 0.08308 0.75490   5
   0  -6   3 -0.0158 0.54854   2
  -6   0   3 -1.7637 1.81246   1
   0  -6   3 -0.3547 1.30689   4
   0   6   3 0.76464 2.13445   4
  -6   0   3 0.11061 0.54157   3
   0   6   3 1.22648 1.75517   6
  -1  -6  -3 1.56741 0.49414   5
  -1  -6  -3 1.21673 0.30240   3
   1   6  -3 3.90002 2.18518   6
   6  -1  -3 2.33083 1.58436   6
  -1  -6   3 0.97202 0.81523   5
  -6   1   3 0.48787 2.23996   1
  -1  -6   3 2.48032 0.82608   2
  -6   1   3 2.04610 0.84536   2
  -6   2  -3 0.00417 1.76820   1
   6  -2  -3 1.21489 1.55561   6
   2   6  -3 1.18807 1.52378   6
   6  -2  -3 0.01205 0.56488   2
  -6   2   3 -2.8997 2.10500   4
   6  -2   3 1.29405 1.77917   6
  -2  -6   3 0.12559 0.67310   5
  -2  -6   3 0.72219 0.58570   2
  -6   2   3 -1.0969 1.86167   1
  -6   2   3 -0.6581 0.62001   2
   3   6  -3 1.20866 1.73186   6
   6  -3  -3 0.81337 1.57585   6
  -6   3  -3 0.01851 1.56925   1
   6  -3  -3 0.00907 0.55715   2
  -6   3  -3 0.77409 0.57791   2
  -6   3   3 0.21309 2.35441   4
  -6   3   3 0.75773 0.78877   2
  -3  -6   3 1.48539 1.65107   1
   6  -3   3 1.39593 1.56278   6
  -6   3   3 0.34161 2.48081   1
  -3  -6   3 0.48491 0.50492   3
  -3  -6   3 0.91518 0.68774   5
  -3  -6   3 1.01305 0.59577   2
  -3  -6   3 0.24934 0.44275   3
   6  -4  -3 -0.3616 0.53784   1
  -6   4  -3 -0.2680 0.57433   2
   4   6  -3 -0.0993 1.40433   6
   6  -4  -3 -0.8452 1.30903   6
  -6   4  -3 -0.3367 1.42048   1
   6  -4  -3 0.20070 0.60676   2
  -4  -6   3 0.40428 0.50487   5
  -4  -6   3 -0.4176 1.32246   1
   6  -4   3 0.13042 1.38578   6
  -6   4   3 -1.0760 0.48708   2
  -6   4   3 0.77221 2.18666   1
  -6   4   3 -1.7814 2.08360   4
  -6   4   3 1.16473 3.32928   6
   5   6  -3 0.04177 1.32052   6
  -6   5  -3 0.28294 0.56913   2
   6  -5  -3 0.91529 1.39266   6
   6  -5  -3 0.32332 0.58236   1
   6  -5  -3 -0.4595 0.45494   2
  -6   5  -3 0.29981 1.57531   1
  -6   5   3 -0.1669 2.99126   6
   6  -5   3 0.61990 0.53009   2
  -6   5   3 -0.8948 2.03883   4
  -6   5   3 -1.1835 1.67163   1
   6  -5   3 1.29134 1.47434   6
  -5  -6   3 -0.8071 1.32237   1
  -6   5   3 0.67100 0.71340   2
   6   6  -3 -0.4138 1.09847   6
   6  -6  -3 -0.2667 0.46309   2
  -6   6  -3 0.07089 0.51471   2
   6  -6  -3 0.58109 1.15766   6
  -6   6  -3 0.06315 1.26882   1
   6  -6  -3 -0.1594 0.43572   1
   6  -6   3 -0.7323 1.25600   6
   6  -6   3 0.04570 0.42158   2
  -6   6   3 0.22479 1.77993   4
  -6   6   3 0.12235 1.67778   1
  -6   6   3 -1.1150 2.54843   6
  -6  -6   3 0.15261 1.34593   1
  -6   6   3 0.18253 0.59631   2
   7   6  -3 0.09420 1.07417   6
  -6   7  -3 0.44697 0.47324   2
   6  -7  -3 -0.4576 0.34389   2
   6  -7  -3 -0.0470 0.39130   1
  -6   7  -3 0.00622 1.15523   1
  -6   7   3 0.20528 1.42472   1
  -6   7   3 -0.3283 0.41865   2
  -6   7   3 -0.6452 1.96425   6
  -7  -6   3 -0.0249 1.11191   1
   6  -7   3 -0.1888 0.31050   2
  -6   7   3 1.94695 1.64101   4
   6  -7   3 -0.1582 1.08355   6
   5  -7  -3 -0.2275 0.45678   1
   5  -7  -3 -0.6730 0.70698   5
  -5   7  -3 0.56402 1.40701   1
   7   5  -3 -0.5513 1.08072   6
  -5   7  -3 -0.4643 0.49451   2
  -5   7  -3 -0.2694 1.64094   4
  -5   7   3 0.23976 0.53231   2
  -5   7   3 2.46544 1.87331   4
   5  -7   3 -0.2279 0.41046   2
   5  -7   3 -0.9149 1.16551   6
  -7  -5   3 0.36180 1.42138   1
  -5   7   3 -0.3675 2.18700   6
  -4   7  -3 2.37259 2.60348   6
  -4   7  -3 0.57087 1.68559   1
   7   4  -3 0.33471 1.17235   6
  -4   7  -3 -0.2304 1.55096   4
   4  -7  -3 2.49113 1.05455   5
   4  -7  -3 -0.0095 0.58786   1
  -4   7  -3 0.51793 0.56294   2
   4  -7   3 0.46657 0.49321   2
  -4   7   3 0.07326 2.26317   6
  -4   7   3 0.10755 0.57002   2
  -4   7   3 0.75175 1.93473   4
   4  -7   3 0.49934 1.36875   6
   4  -7   3 0.19833 0.68101   1
  -7  -4   3 1.42261 1.81344   1
  -3   7  -3 0.13706 1.88750   6
  -3   7  -3 0.45196 1.77170   1
   3  -7  -3 -0.4053 0.47408   1
   3  -7  -3 0.68315 0.87613   5
  -3   7  -3 -0.5986 1.30002   4
   7   3  -3 0.28162 1.11267   6
  -3   7  -3 0.28640 0.50202   2
   3  -7   3 -0.5339 1.37743   6
   3  -7   3 -0.1378 0.67797   1
  -3   7   3 -0.2471 0.65624   2
  -3   7   3 1.14061 2.31074   6
  -7  -3   3 -0.5327 1.66371   1
   3  -7   3 -0.2235 0.42798   2
  -3   7   3 1.24494 1.79019   4
  -2   7  -3 2.72890 1.62611   4
   7   2  -3 3.32397 1.55664   6
  -2   7  -3 1.36219 1.84462   1
   2  -7  -3 1.61808 0.99996   1
  -2   7  -3 3.30910 1.96728   6
  -2   7  -3 0.77516 0.61064   2
   2  -7  -3 2.59036 0.67838   2
   2  -7  -3 3.69745 1.14777   5
  -2   7   3 2.81320 2.18701   6
   2  -7   3 2.76894 0.78433   2
   2  -7   3 2.17505 1.36471   1
  -7  -2   3 5.52956 2.87160   1
   2  -7   3 0.88917 0.80239   5
  -7  -2   3 2.41087 0.60586   5
   2  -7   3 1.62263 1.74684   6
  -2   7   3 3.51055 2.06294   4
  -1   7  -3 -1.0611 1.29559   4
   1  -7  -3 0.46483 0.78435   1
  -1   7  -3 1.81539 1.81592   6
  -1   7  -3 0.40058 0.50687   2
   1  -7  -3 0.60089 0.71001   5
   7   1  -3 0.64600 1.30949   6
   1  -7   3 0.33745 0.52335   2
   1  -7   3 -0.2213 1.00422   1
  -7  -1   3 -0.9848 1.66237   1
  -7  -1   3 -0.2597 0.45320   3
  -1   7   3 -1.5400 1.33070   4
   1  -7   3 -0.3668 0.56508   5
  -1   7   3 0.57373 1.68896   6
   0   7  -3 -0.2532 1.57809   6
   0   7  -3 0.01136 1.49960   4
   0  -7  -3 0.05027 0.32574   3
   0  -7  -3 0.46322 0.81111   1
   7   0  -3 -0.1659 1.28486   6
   0  -7  -3 0.41065 0.53573   5
   0   7  -3 0.55641 0.52829   2
   0  -7   3 0.43749 0.55925   2
   0  -7   3 0.37570 1.17674   1
   0  -7   3 -0.5053 0.54769   5
  -7   0   3 0.16181 0.55130   3
   0   7   3 -0.1607 1.49541   6
   0   7   3 -1.8873 1.57938   4
  -7   0   3 -0.2409 1.80374   1
  -7   0   3 -0.7464 0.56133   2
  -7   1  -3 -0.3480 1.93677   1
  -1  -7  -3 -0.0010 0.87830   1
   1   7  -3 -0.0082 1.52407   4
   7  -1  -3 0.82807 1.36033   6
   1   7  -3 -0.8505 1.43705   6
  -7   1   3 0.29799 1.93304   1
   1   7   3 2.29650 1.85326   6
  -7   1   3 -0.0448 0.63292   2
  -1  -7   3 -0.6859 0.59488   5
  -1  -7   3 -0.3640 0.50044   2
   7  -2  -3 3.83284 1.66083   6
   2   7  -3 1.65492 1.72562   6
  -7   2  -3 1.45034 1.99097   1
   7  -2  -3 1.26408 0.82843   2
  -2  -7   3 0.86503 0.69685   5
  -7   2   3 2.49337 0.80657   2
  -7   2   3 0.77510 2.25441   1
  -2  -7   3 2.08123 0.66743   2
   7  -2   3 4.23153 1.89014   6
   3   7  -3 -0.2299 1.42343   6
  -7   3  -3 0.61964 1.60615   1
   7  -3  -3 -0.3733 0.51074   2
   7  -3  -3 0.10453 1.31063   6
  -7   3   3 -0.6858 0.63021   2
  -7   3   3 0.08447 1.99390   1
   7  -3   3 -1.0202 1.35214   6
  -3  -7   3 0.14550 0.49695   5
   7  -4  -3 0.38093 0.47876   2
  -7   4  -3 0.53451 0.54637   2
   4   7  -3 2.67814 1.70949   6
   7  -4  -3 1.20988 1.27573   6
  -7   4  -3 -0.4350 1.36909   1
   7  -4   3 -0.4343 1.26751   6
  -7   4   3 -0.0573 0.66615   2
  -4  -7   3 0.33962 0.26285   5
  -7   4   3 -2.8547 2.05360   4
  -7   4   3 0.19213 1.74544   1
   7  -5  -3 -0.2538 0.44169   2
  -7   5  -3 -0.1388 1.40683   1
   7  -5  -3 1.39689 1.26120   6
   5   7  -3 0.16918 1.32912   6
  -7   5  -3 0.32637 0.49532   2
  -7   5   3 -1.0416 1.49423   1
  -7   5   3 -2.3503 1.85212   4
   7  -5   3 0.79620 1.32166   6
  -7   5   3 0.72854 0.68679   2
  -7   6  -3 0.52959 1.23940   1
   6   7  -3 0.82582 1.23689   6
   7  -6  -3 -1.2238 0.89858   6
  -7   6  -3 0.17183 0.45956   2
   7  -6  -3 -0.2607 0.35834   2
  -7   6   3 0.54351 0.53388   2
  -7   6   3 0.42660 1.59452   4
   7  -6   3 0.48130 1.18023   6
   7  -6   3 -0.2728 0.32428   2
  -7   6   3 -0.5309 1.29876   1
  -6  -7   3 -0.2371 1.06425   1
  -7   7  -3 0.60155 1.09825   1
   7  -7  -3 0.41730 1.56948   6
   7   7  -3 -0.3008 0.94766   6
  -7   7  -3 0.13947 0.40545   2
   7  -7  -3 -0.2423 0.30377   2
  -7   7   3 0.10657 0.42471   2
  -7   7   3 0.84944 1.31751   4
   7  -7   3 0.22267 0.32844   2
   7  -7   3 0.31582 0.93470   6
  -7   7   3 0.44833 1.23784   1
  -7   8  -3 0.01296 0.32732   2
  -7   8  -3 0.37849 0.89797   1
   7  -8  -3 -0.1512 0.25867   2
   8   7  -3 1.56940 0.92856   6
   7  -8   3 0.49967 0.74700   6
   7  -8   3 -0.1143 0.22283   2
  -7   8   3 0.42208 0.30107   2
  -7   8   3 -0.2037 0.99276   4
   6  -8  -3 0.02206 0.33905   2
   6  -8  -3 -0.0190 0.35970   1
   8   6  -3 -0.4283 0.86195   6
  -6   8  -3 -0.1733 0.97770   1
  -6   8  -3 0.17529 0.39514   2
   6  -8   3 -0.5476 0.80262   6
  -6   8   3 -0.7301 0.31486   2
  -6   8   3 -1.5720 1.09594   4
  -6   8   3 0.38288 1.74716   6
  -8  -6   3 -0.4081 0.91827   1
   6  -8   3 -0.3747 0.23909   2
   5  -8  -3 -0.0766 0.67120   5
   5  -8  -3 -0.0273 0.39780   1
  -5   8  -3 -0.2344 0.39071   2
  -5   8  -3 0.37969 1.45820   4
   5  -8  -3 -0.4118 0.33033   2
   8   5  -3 2.00325 1.22562   6
  -5   8  -3 -0.2628 1.02269   1
  -5   8   3 0.56652 1.96179   6
  -5   8   3 -0.1529 1.43225   4
  -5   8   3 -0.2964 0.38911   2
   5  -8   3 -0.4269 0.29280   2
  -8  -5   3 0.64118 1.16368   1
   5  -8   3 -0.1710 1.07385   6
   4  -8  -3 -0.4874 0.45063   2
   4  -8  -3 0.13172 0.48900   1
   8   4  -3 0.44177 0.95837   6
  -4   8  -3 0.71109 1.43243   4
  -4   8  -3 0.85651 1.97312   6
  -4   8  -3 0.07791 0.46306   2
   4  -8  -3 -0.1064 0.70107   5
  -4   8  -3 -0.9787 1.15336   1
   4  -8   3 0.03988 0.55503   1
  -4   8   3 -0.6586 0.42667   2
   4  -8   3 0.61882 1.16591   6
  -8  -4   3 -0.2815 1.22631   1
  -4   8   3 -0.4762 1.40560   4
  -4   8   3 -1.8144 1.82968   6
   4  -8   3 -0.1337 0.35207   2
  -3   8  -3 -0.0499 1.43820   1
   8   3  -3 0.83596 1.09225   6
  -3   8  -3 -1.7707 1.65596   6
  -3   8  -3 0.66680 1.47292   4
  -3   8  -3 0.00070 0.50781   2
   3  -8  -3 0.54297 0.66957   1
   3  -8  -3 0.03781 0.66315   5
   3  -8   3 -0.1495 0.54398   1
  -3   8   3 1.01637 0.65237   2
  -8  -3   3 1.38988 1.78208   1
   3  -8   3 0.64558 0.50391   2
  -3   8   3 0.96205 1.68547   4
   3  -8   3 -0.1650 0.63869   5
  -3   8   3 -2.5396 1.65583   6
  -2   8  -3 -1.4691 1.40783   6
   8   2  -3 -1.2459 0.88016   6
  -2   8  -3 -0.6406 0.44120   2
  -2   8  -3 1.47265 1.36106   4
   2  -8  -3 -0.4077 0.61280   5
   2  -8  -3 -0.0090 0.58382   1
   2  -8   3 -0.4642 0.50933   5
  -2   8   3 -0.1534 1.48020   4
   2  -8   3 -0.2464 0.66222   1
  -8  -2   3 1.15777 1.86124   1
   2  -8   3 -0.0595 0.43556   2
  -2   8   3 -0.0822 1.82582   6
   1  -8  -3 2.01791 0.76855   5
  -1   8  -3 0.04376 1.36278   4
  -1   8  -3 0.57142 1.64625   6
   1  -8  -3 1.58063 0.93638   1
   8   1  -3 1.88138 1.35632   6
  -1   8  -3 0.96751 0.58181   2
   1  -8   3 2.16554 1.32289   1
  -1   8   3 2.69895 1.94110   6
   1  -8   3 1.65466 0.62676   2
  -8  -1   3 2.52010 0.49439   5
   1  -8   3 1.80789 0.89846   5
  -1   8   3 3.22438 1.79701   4
  -8  -1   3 5.05677 2.72617   1
   0  -8  -3 0.10236 0.66461   1
   0  -8  -3 -0.1318 0.34641   5
   0   8  -3 0.60699 1.73587   6
   0   8  -3 -0.5283 1.35009   4
   0   8  -3 0.06439 0.52565   2
   8   0  -3 0.87976 1.31170   6
   0   8   3 -0.1044 1.80091   4
   0  -8   3 -0.6656 0.59369   5
   0  -8   3 -0.1570 0.98647   1
  -8   0   3 -0.1874 1.80801   1
   0  -8   3 -0.2757 0.41779   2
   0   8   3 1.01787 1.61576   6
   1   8  -3 3.06796 1.63539   4
  -8   1  -3 0.71075 2.04774   1
   1   8  -3 4.67746 2.26403   6
   8  -1  -3 2.53273 1.61925   6
  -1  -8  -3 2.00261 1.16528   1
  -8   1   3 -0.0291 0.61406   2
  -1  -8   3 1.20830 1.29954   1
   8  -1   3 2.73875 1.56118   6
  -8   1   3 2.38508 2.34234   1
  -1  -8   3 2.94016 0.67836   2
   1   8   3 1.51985 1.67400   6
  -1  -8   3 2.01452 0.84327   5
   2   8  -3 0.93090 1.61397   6
  -8   2  -3 -0.0337 1.39421   1
   2   8  -3 0.15176 1.39616   4
   8  -2  -3 0.33506 1.35794   6
  -2  -8  -3 0.46034 0.97442   1
   8  -2   3 -0.5419 1.22250   6
  -2  -8   3 -1.5477 0.39728   5
   2   8   3 0.07355 1.52401   6
  -8   2   3 -0.2994 1.77451   1
  -8   2   3 0.27769 0.69350   2
   8  -3  -3 0.44767 0.54457   2
   3   8  -3 2.73023 1.61346   4
  -8   3  -3 -0.2053 1.46975   1
   8  -3  -3 -0.5273 1.08479   6
   3   8  -3 2.75144 1.60756   6
  -8   3   3 1.14269 0.81234   2
  -8   3   3 -0.5433 1.71666   1
  -3  -8   3 0.04663 0.40212   5
   8  -3   3 -0.0892 1.27440   6
  -8   4  -3 0.26062 1.26300   1
   8  -4  -3 0.25368 0.47159   2
   4   8  -3 -0.3199 1.28411   4
   8  -4  -3 0.21939 1.15458   6
   4   8  -3 1.18887 1.35053   6
   8  -4   3 -0.3571 1.14639   6
  -8   4   3 0.65881 0.63914   2
  -8   4   3 0.03872 1.64063   1
   8  -5  -3 -0.2190 0.97218   6
  -8   5  -3 -0.8263 1.06817   1
   5   8  -3 0.27982 1.31027   4
   8  -5  -3 0.08752 0.44521   2
   5   8  -3 -0.0371 1.22844   6
   8  -5   3 -0.2415 1.09165   6
  -8   5   3 0.19778 1.29830   1
  -8   5   3 1.08745 0.59319   2
   8  -6  -3 -0.0526 0.33918   2
   8  -6  -3 0.24592 0.89654   6
  -8   6  -3 -0.3400 0.87708   1
   6   8  -3 -0.6256 0.93379   6
   8  -6   3 1.26923 0.97466   6
   8  -6   3 -0.6390 0.27576   2
  -8   6   3 0.26196 1.15669   1
  -8   6   3 -0.0922 0.42863   2
  -8   7  -3 0.31377 0.83412   1
   8  -7  -3 -0.4862 0.22604   2
   7   8  -3 0.61078 0.86791   6
  -8   7   3 0.48283 0.36061   2
  -8   7   3 1.54290 1.11624   1
   8  -7   3 -0.0901 0.73504   6
  -8   8  -3 -0.0984 0.60032   1
   8  -8  -3 0.12879 0.17941   2
   8  -8   3 -0.2453 0.52385   6
   8  -8   3 0.02815 0.23599   2
  -8   8   3 0.18137 0.22900   2
   7  -9  -3 -0.0913 0.16826   2
  -7   9   3 0.03279 0.20023   2
   6  -9  -3 -0.3754 0.20526   2
  -6   9  -3 0.00502 0.26449   2
   6  -9  -3 -0.0809 0.27901   1
  -6   9   3 0.67660 0.91628   4
  -6   9   3 -0.0501 0.26342   2
   6  -9   3 0.01150 0.21239   2
  -5   9  -3 -1.4781 1.00834   4
  -5   9  -3 0.16672 0.33534   2
   5  -9  -3 0.14543 0.32735   1
   5  -9  -3 0.20365 0.29736   2
   9   5  -3 0.37737 0.80367   6
  -5   9   3 0.83419 1.42002   6
  -9  -5   3 -0.0705 0.88582   1
  -5   9   3 0.21999 1.04446   4
   5  -9   3 0.22210 0.27332   2
  -5   9   3 0.41256 0.33486   2
   4  -9  -3 0.03364 0.32259   2
  -4   9  -3 -0.6421 0.32027   2
  -4   9  -3 0.12777 1.11986   4
   4  -9  -3 0.68351 0.51673   5
   9   4  -3 -0.0264 0.80367   6
  -4   9  -3 1.50674 1.78410   6
   4  -9  -3 0.05997 0.40215   1
  -4   9   3 -0.3036 1.42048   6
   4  -9   3 0.03574 0.70403   5
   4  -9   3 0.00706 0.50331   1
  -9  -4   3 -0.2818 1.08122   1
   4  -9   3 -0.0832 0.28574   2
  -4   9   3 -1.5023 1.19039   4
  -4   9   3 0.29917 0.42348   2
  -3   9  -3 0.19121 0.44024   2
  -3   9  -3 0.75668 1.66690   6
   9   3  -3 1.24193 0.95736   6
   3  -9  -3 -0.2517 0.46847   5
   3  -9  -3 0.12165 0.44871   1
  -3   9  -3 0.54200 1.29650   4
   3  -9  -3 -0.3926 0.31594   2
  -9  -3   3 0.40297 1.28745   1
  -3   9   3 1.34410 1.65211   6
   3  -9   3 0.89817 0.68180   5
   3  -9   3 0.00093 0.55971   1
  -3   9   3 0.59545 1.37186   4
  -3   9   3 -0.2671 0.45487   2
   3  -9   3 -0.1016 0.30705   2
   2  -9  -3 0.19444 0.52175   5
  -2   9  -3 -0.1251 1.51273   6
  -2   9  -3 0.98121 1.45358   4
   2  -9  -3 0.80714 0.66420   1
   9   2  -3 0.10188 0.90039   6
  -2   9  -3 0.15331 0.43826   2
   2  -9   3 0.54945 0.62757   5
   2  -9   3 0.24963 0.68262   1
   2  -9   3 -0.1564 0.33428   2
  -9  -2   3 1.92587 1.69842   1
  -2   9   3 -0.0063 1.31175   4
  -2   9   3 1.12362 1.71171   6
   1  -9  -3 -0.2781 0.46622   1
  -1   9  -3 -1.0496 1.04727   4
   1  -9  -3 -0.3651 0.32964   5
  -1   9  -3 -0.2566 0.46969   2
  -1   9  -3 -1.6366 1.36284   6
   9   1  -3 0.43708 0.96017   6
  -9  -1   3 0.03488 1.57747   1
   1  -9   3 0.69174 0.65430   5
  -1   9   3 0.23610 1.51402   6
   1  -9   3 0.04412 0.76931   1
  -1   9   3 -1.2021 1.38914   4
   1  -9   3 -0.2440 0.35622   2
   0   9  -3 -0.4494 1.13612   4
   0   9  -3 -0.6312 1.21672   6
   0  -9  -3 0.51996 0.68904   1
   9   0  -3 -0.8408 0.92844   6
   0   9  -3 -0.7402 0.49225   2
   0  -9   3 0.95111 0.87502   1
   0   9   3 1.33982 1.61523   6
   0   9   3 -0.1477 1.54491   4
  -9   0   3 0.01557 1.69118   1
   0  -9   3 0.00378 0.34885   2
   0  -9   3 0.51121 0.59396   5
   1   9  -3 -0.0423 1.19720   4
   1   9  -3 -0.8850 1.21481   6
  -1  -9  -3 -0.2621 0.55260   1
   9  -1  -3 -0.0909 0.98864   6
  -9   1  -3 -0.4377 1.71855   1
  -1  -9   3 -0.3084 0.46744   5
   1   9   3 -0.3589 1.59457   4
  -9   1   3 -0.8203 1.46100   1
   9  -1   3 0.92517 1.10887   6
   1   9   3 -1.7165 1.25511   6
  -1  -9   3 -0.5110 0.75083   1
  -9   2  -3 -0.6397 1.53949   1
   2   9  -3 1.13384 1.40801   6
   2   9  -3 0.74450 1.30552   4
  -2  -9  -3 0.97928 0.83370   1
   9  -2   3 0.54883 1.05598   6
  -2  -9   3 0.40016 0.92623   1
  -9   2   3 1.23267 1.88949   1
  -2  -9   3 -0.0988 0.37220   5
   2   9   3 -1.2022 1.25532   6
   9  -3  -3 -0.2408 0.98975   6
   3   9  -3 1.19872 1.24545   4
   3   9  -3 -0.5285 1.24864   6
  -9   3  -3 0.47376 1.34104   1
  -9   3   3 0.04822 0.64821   2
  -9   3   3 -0.1546 1.38418   1
  -3  -9   3 -0.1948 0.86562   1
   9  -3   3 1.74197 1.03785   6
  -9   4  -3 1.05145 1.35330   1
   4   9  -3 -0.4605 1.14991   4
   4   9  -3 -0.2015 1.14370   6
   9  -4  -3 -0.3051 0.32290   2
   9  -4  -3 0.79558 0.99281   6
  -9   4   3 0.85041 1.32324   1
  -4  -9   3 -0.0069 0.75105   1
  -9   4   3 -0.6012 0.47593   2
   9  -4   3 0.69841 0.88305   6
   9  -5  -3 0.08665 0.30270   2
   5   9  -3 -0.5964 0.95246   6
  -9   5  -3 0.43575 1.03078   1
   5   9  -3 -1.8206 1.61367   4
  -5  -9   3 0.03444 0.70688   1
   9  -5   3 0.73263 0.86612   6
  -9   5   3 -0.3143 0.42124   2
  -9   5   3 -0.1862 1.03479   1
   6   9  -3 -0.5140 0.78626   6
   9  -6  -3 -0.0053 0.64856   6
   9  -6  -3 -0.0990 0.21084   2
  -9   6  -3 -0.4572 0.64212   1
  -6  -9   3 0.00419 0.54954   1
  -9   6   3 -0.1171 0.30906   2
   9  -6   3 -0.6402 0.63095   6
  -9   6   3 0.02261 0.80733   1
  -9   7  -3 0.14920 0.66102   1
   9  -7  -3 0.29223 0.19478   2
   9  -7   3 0.68894 0.54031   6
  -5  10  -3 0.45412 0.27371   2
   5 -10  -3 -0.1171 0.22559   1
  -5  10   3 0.20516 0.77207   4
  -5  10   3 0.24318 0.24759   2
  -5  10   3 0.37281 1.06672   6
  -4  10  -3 0.90154 0.98374   4
  10   4  -3 -0.9540 0.61945   6
  -4  10  -3 0.24719 0.29950   2
   4 -10  -3 0.01263 0.27308   1
 -10  -4   3 -0.4091 0.77851   1
  -4  10   3 0.70788 0.92380   4
  -4  10   3 0.48509 0.32020   2
   4 -10   3 -0.1718 0.20364   2
  -4  10   3 -0.8255 1.14231   6
   3 -10  -3 -0.0606 0.28465   1
  -3  10  -3 -1.3171 1.24939   6
  -3  10  -3 -0.2831 0.90373   4
  -3  10  -3 0.01059 0.31667   2
  10   3  -3 0.35872 0.77573   6
 -10  -3   3 0.28533 0.99097   1
  -3  10   3 -0.3248 0.34317   2
  -3  10   3 0.62598 1.34003   6
   3 -10   3 0.26752 0.24720   2
   3 -10   3 0.22132 0.41065   1
  -3  10   3 1.03658 1.09325   4
   2 -10  -3 0.21387 0.40769   1
  -2  10  -3 -0.5247 1.01428   4
  -2  10  -3 0.35099 0.39772   2
  10   2  -3 0.16325 0.78372   6
  -2  10  -3 0.39345 1.23383   6
   2 -10   3 0.07231 0.26052   2
 -10  -2   3 -0.5567 0.98012   1
  -2  10   3 0.45200 1.30074   6
  -2  10   3 1.91398 1.35177   4
   2 -10   3 0.15253 0.49619   1
   1 -10  -3 0.16294 0.44879   1
  -1  10  -3 0.77626 0.43592   2
  -1  10  -3 1.53472 1.15422   4
  -1  10  -3 -0.0468 1.24465   6
  10   1  -3 0.83603 0.94250   6
  -1  10   3 2.33735 1.41323   4
 -10  -1   3 1.81311 1.46822   1
   1 -10   3 0.30961 0.55933   1
   1 -10   3 -0.1310 0.24508   2
   1 -10   3 -1.0635 0.40202   5
  -1  10   3 0.83947 1.35972   6
   0 -10  -3 0.00036 0.41998   1
   0  10  -3 -0.9571 1.16873   6
   0  10  -3 0.56062 0.44019   2
  10   0  -3 0.28729 0.79576   6
   0  10  -3 -0.0320 0.99814   4
   0  10   3 -0.2803 1.19044   4
 -10   0   3 -0.1020 1.29971   1
   0  10   3 -0.8698 1.04967   6
   0 -10   3 -0.1813 0.51084   1
   0 -10   3 -0.2548 0.37051   5
  10  -1  -3 0.49775 0.86389   6
   1  10  -3 1.95271 1.36987   6
  -1 -10  -3 0.22694 0.47503   1
 -10   1  -3 0.31036 1.50876   1
   1  10  -3 0.86427 1.11615   4
  10  -1   3 0.31864 0.81548   6
   1  10   3 1.19048 1.31588   6
 -10   1   3 0.47599 1.46710   1
  -1 -10   3 0.60272 0.77790   1
   1  10   3 -0.6305 1.19806   4
   2  10  -3 0.11440 1.05904   6
   2  10  -3 -0.8929 0.91994   4
 -10   2  -3 0.19405 1.34969   1
  -2 -10  -3 -0.0210 0.43316   1
  10  -2  -3 1.25750 0.93227   6
  10  -2   3 0.69808 0.76934   6
   2  10   3 0.27898 1.10340   6
  -2 -10   3 0.14497 0.64618   1
 -10   2   3 0.32569 1.29132   1
   3  10  -3 -1.4984 0.74933   6
   3  10  -3 -0.1960 0.94981   4
 -10   3  -3 -0.2623 1.06077   1
  10  -3  -3 -0.9822 0.61921   6
  -3 -10   3 0.08160 0.58036   1
 -10   3   3 -0.3011 0.98702   1
  10  -3   3 0.70845 0.76468   6
  10  -4  -3 0.19596 0.68915   6
  10  -4  -3 0.10926 0.27376   2
   4  10  -3 -0.0064 0.88139   6
 -10   4  -3 -0.6177 0.75114   1
   4  10  -3 0.07971 0.84332   4
  -4 -10   3 -0.0201 0.53786   1
 -10   4   3 -0.5060 0.78632   1
  10  -4   3 0.04341 0.61762   6
  10  -5  -3 -0.0818 0.20653   2
  10  -5  -3 -0.0217 0.53057   6
 -10   5  -3 -0.0085 0.77958   1
   5  10  -3 -1.0106 0.63314   6
  -5 -10   3 0.39917 0.51531   1
 -10   5   3 -0.1059 0.66767   1
  10  -5   3 0.43795 0.56013   6
 -10   6  -3 0.06727 0.80364   1
  -3  11  -3 0.03250 0.21209   2
   3 -11  -3 0.00092 0.19442   1
  -3  11  -3 -0.8781 0.67210   4
  -3  11   3 -0.2074 0.67798   4
  -3  11   3 -0.6886 0.87797   6
  11   2  -3 0.91938 0.61918   6
  -2  11  -3 0.57755 0.79274   4
   2 -11  -3 0.20637 0.28261   1
  -2  11  -3 -0.0447 1.00850   6
  -2  11  -3 -0.0663 0.27376   2
  -2  11   3 -0.1266 0.94399   6
   2 -11   3 0.10955 0.36184   1
  -2  11   3 0.05752 0.79430   4
 -11  -2   3 0.47146 0.90917   1
   1 -11  -3 0.04011 0.27779   1
  -1  11  -3 0.46979 0.79866   4
  -1  11  -3 0.09544 0.33374   2
  11   1  -3 0.81693 0.60801   6
  -1  11  -3 -0.7694 0.89839   6
  -1  11   3 -0.3712 0.89214   6
   1 -11   3 -0.2731 0.30850   1
 -11  -1   3 -0.3255 0.87820   1
  -1  11   3 1.25505 0.89103   4
   0  11  -3 0.04977 0.91002   6
   0  11  -3 0.20321 0.74113   4
  11   0  -3 -0.3840 0.55624   6
   0 -11  -3 0.27563 0.34186   1
   0  11   3 0.43053 0.90766   4
   0 -11   3 -0.0526 0.32937   1
   0  11   3 0.02012 0.94752   6
 -11   0   3 -0.7891 0.86486   1
  11  -1  -3 0.02929 0.59036   6
   1  11  -3 0.20738 0.75996   4
   1  11  -3 0.18965 0.79822   6
  -1 -11  -3 0.11777 0.31019   1
   1  11   3 2.18054 1.12215   6
  -1 -11   3 -0.0701 0.35226   1
 -11   1   3 0.42074 0.97532   1
  11  -2  -3 0.28542 0.59119   6
 -11   2  -3 0.30303 0.93356   1
  -2 -11  -3 0.05956 0.30688   1
   2  11  -3 -0.6102 0.72741   4
   2  11  -3 0.27375 0.79232   6
  -2 -11   3 0.17367 0.39324   1
 -11   2   3 0.76348 1.00170   1
   2  11   3 0.15258 0.90688   6
   3  11  -3 0.03327 0.68593   6
  11  -3  -3 -0.0309 0.51352   6
 -11   3  -3 0.41349 0.89418   1
 -11   3   3 0.18604 0.78227   1
  11  -3   3 0.01095 0.55809   6
  -3 -11   3 0.33787 0.39301   1
   0   0   4 8003.01 687.887   3
   1   0  -4 -9.2607 0.54203   3
   0  -1  -4 -9.1977 0.47798   3
  -1   0   4 -9.9217 0.41078   3
   1  -1  -4 4009.59 306.688   3
  -1   1   4 3132.44 306.791   3
   1  -2  -4 181.408 15.5288   3
  -1   2  -4 203.535 15.6394   5
   1  -2  -4 161.419 15.8228   5
  -2  -1   4 151.580 15.5038   3
   0  -2  -4 1376.90 117.526   5
   0  -2  -4 1511.77 117.214   3
  -2   0   4 1192.50 117.333   3
   2  -1  -4 176.921 14.5528   3
  -2   1   4 149.362 14.5789   3
  -1  -2   4 159.621 14.4628   3
   2  -2  -4 387.665 37.1735   5
   2  -2  -4 464.112 36.8150   3
  -2   2   4 410.008 36.8916   3
  -2  -2   4 413.303 36.7055   3
   2  -3  -4 61.7850 5.22630   3
   2  -3  -4 52.3144 5.57883   5
  -3  -2   4 49.6605 5.07094   3
   1  -3  -4 262.520 26.6138   5
   1  -3  -4 329.123 26.3425   3
  -1   3  -4 331.198 26.4641   5
  -3  -1   4 275.992 26.3522   3
   0  -3  -4 -3.4724 0.34017   3
   0  -3  -4 -3.4349 0.60572   5
  -3   0   4 -4.5643 0.48057   3
  -1  -3   4 297.828 25.6022   3
  -3   1   4 262.369 25.7274   3
  -1  -3   4 319.757 25.9857   5
   3  -2  -4 43.8466 5.59771   5
  -2  -3   4 66.8475 5.57484   5
  -2  -3   4 55.2523 5.15393   3
   3  -3  -4 643.731 56.8336   5
  -3  -3   4 652.732 56.1283   3
   3  -4  -4 25.5112 3.84932   5
  -4  -3   4 37.6997 3.42657   5
  -4  -3   4 29.0356 3.12229   3
   2  -4  -4 645.392 63.6697   5
   2  -4  -4 856.152 63.5003   3
  -4  -2   4 697.091 63.2145   3
   1  -4  -4 10.9821 1.48232   3
   1  -4  -4 10.2551 1.91909   5
   1  -4   4 9.22756 1.88581   5
  -4  -1   4 9.89020 1.62432   3
   0  -4  -4 645.514 61.4051   5
   0  -4  -4 764.358 61.1054   3
  -4   0   4 668.582 61.3789   3
   0  -4   4 759.990 61.7392   5
  -1  -4  -4 12.1763 1.21873   3
  -1  -4   4 12.0600 2.07761   5
  -2  -4   4 708.246 66.5786   3
  -2  -4   4 845.794 67.0813   5
   4  -3  -4 29.1249 3.96365   5
  -3  -4   4 33.7418 3.25785   5
  -3  -4   4 26.0955 2.88158   3
   4  -4  -4 943.344 74.5287   6
   4  -4  -4 746.711 73.7793   5
   4  -4  -4 832.507 74.1206   1
  -4   4  -4 923.971 73.2834   2
  -4   4   4 741.972 76.8457   1
  -4  -4   4 841.515 73.1210   3
   4  -4   4 856.775 74.8121   6
  -4   4   4 887.894 73.3076   2
  -4   4   4 810.607 75.0362   4
  -4   4   4 799.131 76.3066   6
  -4  -4   4 910.699 73.1200   2
   4  -5  -4 10.4987 2.18915   1
  -4   5  -4 13.2123 1.67611   2
  -4   5  -4 9.40541 2.91435   4
   5   4  -4 30.6419 3.95535   6
   4  -5  -4 8.24039 1.95175   5
   4  -5  -4 15.6369 2.79820   6
  -4   5  -4 2.69269 2.23529   1
  -4   5   4 15.1803 4.87109   6
  -4   5   4 10.8574 4.13467   1
  -4   5   4 12.6287 3.40753   4
  -5  -4   4 10.6048 1.34039   2
   4  -5   4 11.6477 1.65315   2
  -5  -4   4 9.82433 1.40731   3
   4  -5   4 12.0787 2.95602   6
  -5  -4   4 9.35229 1.42703   5
  -4   5   4 10.2254 1.69194   2
   3  -5  -4 458.645 49.7228   5
  -3   5  -4 677.518 50.7548   4
   3  -5  -4 545.443 50.2815   1
  -3   5  -4 608.321 49.3687   2
  -3   5  -4 601.740 51.3479   6
  -5  -3   4 666.511 49.5503   5
   3  -5   4 614.140 50.8270   1
  -3   5   4 529.887 51.9297   6
  -3   5   4 590.198 49.4608   2
   3  -5   4 588.510 50.8986   6
   3  -5   4 535.037 49.2859   2
  -5  -3   4 536.295 49.1750   2
  -3   5   4 527.650 50.8765   4
   3  -5   4 559.230 49.9339   4
  -5  -3   4 534.846 49.2450   3
  -2   5  -4 39.3998 3.47670   2
  -2   5  -4 52.6078 5.77447   4
  -2   5  -4 58.7609 7.29040   6
   2  -5  -4 35.9068 4.15352   5
   2  -5  -4 30.7459 4.13175   1
  -2   5   4 33.9898 5.46918   4
   2  -5   4 35.0002 5.38684   6
  -5  -2   4 31.9565 3.35391   2
  -5  -2   4 29.6634 3.38414   3
   2  -5   4 32.8952 3.41728   2
   2  -5   4 32.5619 5.31750   6
   2  -5   4 34.8204 4.33500   4
  -2   5   4 34.1404 6.46470   6
   1  -5  -4 1015.91 79.5441   3
   1  -5  -4 853.785 79.9459   5
   1  -5   4 869.164 80.0493   5
  -5  -1   4 943.771 79.6665   3
   0  -5  -4 -0.7260 0.28967   3
   0  -5  -4 0.50679 0.69734   5
   0  -5   4 -1.4103 0.57462   5
  -1  -5   4 1083.21 86.9903   2
  -1  -5   4 989.530 87.2878   5
  -5   1   4 949.503 87.0012   2
   5  -2  -4 39.9634 5.33033   6
  -5   2   4 25.4925 5.44119   4
  -5   2   4 40.4113 8.35481   1
  -2  -5   4 32.9484 3.62155   5
  -2  -5   4 33.9061 3.44580   2
  -5   2   4 33.9601 3.57357   2
   5  -3  -4 531.807 47.9832   2
   5  -3  -4 506.113 48.5303   1
   5  -3  -4 646.313 49.4376   6
  -5   3  -4 556.229 47.9197   2
  -5   3   4 573.987 48.0997   2
  -3  -5   4 612.764 48.2740   5
  -5   3   4 468.437 50.6689   6
   5  -3   4 559.142 49.4052   6
  -3  -5   4 512.445 47.8434   3
  -5   3   4 551.788 52.4331   1
  -5   3   4 484.979 49.4969   4
  -3  -5   4 619.529 47.9416   2
   5  -4  -4 9.90888 2.02544   1
  -5   4  -4 9.44663 1.58635   2
   4   5  -4 35.6231 4.46021   6
   5  -4  -4 13.9103 2.87564   6
   5  -4  -4 9.47663 1.60803   2
  -5   4   4 12.7515 3.65836   4
  -4  -5   4 11.4565 1.65203   5
  -5   4   4 12.8871 4.73270   6
  -4  -5   4 12.2927 1.49442   2
  -5   4   4 13.5619 4.85429   1
  -4  -5   4 11.8889 1.59706   3
   5  -4   4 11.2855 3.01473   6
  -4  -5   4 6.71445 1.63658   3
  -5   4   4 12.6455 1.84390   2
  -5   5  -4 477.483 40.9196   2
   5  -5  -4 478.858 40.9266   2
   5  -5  -4 462.491 41.6630   1
  -5   5   4 430.458 42.4762   4
  -5   5   4 487.098 40.9980   2
  -5  -5   4 492.893 40.9498   5
   5  -5   4 489.533 42.3869   6
  -5   5   4 427.337 43.6341   6
   5  -5   4 444.856 40.8761   2
  -5   5   4 507.536 45.0426   1
   5  -6  -4 0.27549 0.54266   1
   5  -6  -4 -1.1135 0.42741   2
  -5   6  -4 3.88880 2.14439   4
   5  -6  -4 2.74883 1.55939   6
   6   5  -4 -0.3212 1.25429   6
   5  -6  -4 -0.3183 0.78990   5
  -5   6  -4 0.06450 1.30906   1
  -5   6  -4 -0.1101 0.54818   2
  -6  -5   4 0.08320 1.50993   1
   5  -6   4 -0.4447 1.28319   6
   5  -6   4 0.16267 0.44248   2
  -5   6   4 -1.2951 1.94325   4
  -5   6   4 -0.4693 2.06714   1
  -5   6   4 -0.5334 2.74014   6
  -5   6   4 0.13301 0.51815   2
  -4   6  -4 200.246 20.1555   4
  -4   6  -4 230.030 19.1253   2
   4  -6  -4 194.710 19.4857   5
   4  -6  -4 219.966 19.9418   1
  -4   6   4 219.654 19.1718   2
   4  -6   4 209.698 19.0650   2
  -6  -4   4 247.562 19.0286   5
  -4   6   4 201.200 21.5668   6
   4  -6   4 216.477 20.3976   6
  -4   6   4 194.919 20.4506   4
   6   3  -4 0.79335 1.31193   6
  -3   6  -4 0.51144 0.64480   2
  -3   6  -4 -1.7869 1.49585   4
  -3   6  -4 -0.2385 1.50795   1
   3  -6  -4 0.68771 0.91059   1
   3  -6  -4 0.47559 0.83684   5
  -3   6  -4 2.41545 2.37175   6
   3  -6   4 1.05610 0.63054   2
  -3   6   4 -1.9966 2.34364   6
  -6  -3   4 1.34972 0.60504   5
  -3   6   4 0.85146 0.79658   2
  -3   6   4 1.03792 1.98518   4
   3  -6   4 -0.2703 1.51160   6
  -6  -3   4 0.61376 0.53618   3
   3  -6   4 1.07560 1.11182   1
  -6  -3   4 1.78146 2.19579   1
   2  -6  -4 344.468 30.8534   1
   2  -6  -4 305.387 30.1674   5
  -2   6  -4 360.597 29.8900   2
  -6  -2   4 318.033 29.6991   2
  -2   6   4 377.891 31.4983   4
   2  -6   4 365.370 29.9000   2
  -2   6   4 356.703 32.2178   6
  -6  -2   4 323.263 29.8229   3
   2  -6   4 346.804 31.8081   1
   2  -6   4 363.742 31.4176   6
  -1   6  -4 13.8981 2.83238   4
   6   1  -4 7.65602 2.12841   6
  -1   6  -4 -0.0030 2.05073   1
  -1   6  -4 4.58885 0.97118   2
   1  -6  -4 4.69050 1.17624   5
   1  -6  -4 5.15443 1.59544   1
   1  -6  -4 3.99033 0.84214   3
  -1   6  -4 12.4359 2.99579   6
   1  -6   4 6.06346 1.09918   2
  -1   6   4 4.70315 2.47827   6
  -6  -1   4 19.1734 4.80672   1
   1  -6   4 0.63469 1.35696   1
   1  -6   4 7.24934 2.64724   6
   1  -6   4 4.30128 1.52739   4
   1  -6   4 4.16419 1.26810   5
  -6  -1   4 5.47528 1.03476   2
  -1   6   4 9.31946 3.00525   4
  -6  -1   4 3.60596 1.47244   3
   0  -6  -4 1182.21 104.737   3
   0  -6  -4 1312.27 106.437   1
   0  -6  -4 1096.60 105.153   5
   0   6  -4 1250.28 104.989   2
   0  -6   4 1330.23 105.079   2
   0  -6   4 1125.98 105.499   5
   0  -6   4 1321.57 105.877   4
   0  -6   4 1150.19 107.090   6
   1   6  -4 13.7875 3.24342   6
   1   6  -4 6.06751 1.18952   2
   6  -1  -4 9.84718 2.52782   6
   6  -1  -4 4.82453 1.16396   2
  -1  -6   4 8.16355 1.81739   4
  -1  -6   4 6.61134 1.21115   2
  -6   1   4 4.37646 2.58825   4
  -1  -6   4 4.93291 1.24949   5
  -6   1   4 4.21763 1.19593   2
  -6   1   4 10.8783 4.17853   1
   6  -2  -4 353.367 31.2078   2
  -6   2   4 352.914 31.2727   2
  -6   2   4 316.927 32.4587   4
  -2  -6   4 389.948 31.1821   2
   6  -2   4 350.042 32.4540   6
  -2  -6   4 368.806 31.5099   5
   6  -3  -4 0.65658 1.16355   1
   6  -3  -4 0.97052 1.42424   6
  -6   3  -4 -0.4461 1.44318   1
   3   6  -4 2.62301 1.82609   6
   6  -3  -4 0.59421 0.60813   2
  -6   3  -4 0.82680 0.74885   2
  -6   3   4 0.39829 2.38859   1
  -3  -6   4 1.02614 1.75935   1
  -6   3   4 1.59161 2.35129   4
  -6   3   4 0.27843 0.71697   2
  -3  -6   4 1.00831 0.63792   5
   6  -3   4 1.69718 1.69884   6
  -3  -6   4 0.21431 0.50667   2
  -6   3   4 -1.6200 3.38466   6
   6  -4  -4 228.549 20.1413   1
   6  -4  -4 271.504 20.8532   6
   6  -4  -4 214.090 19.5117   2
  -6   4  -4 195.622 19.4034   2
  -6   4   4 277.035 24.3827   1
  -6   4   4 206.510 21.0639   4
  -6   4   4 180.607 21.9853   6
   6  -4   4 208.764 20.7392   6
  -4  -6   4 209.470 19.5433   5
  -6   4   4 245.855 19.7093   2
   6  -5  -4 0.97073 0.61405   2
   6  -5  -4 1.57512 1.36380   6
  -6   5  -4 0.03069 0.53807   2
   5   6  -4 0.08561 1.44286   6
  -6   5  -4 0.71575 1.54410   1
   6  -5  -4 -0.0981 0.51817   1
  -6   5   4 0.28004 2.25669   1
  -6   5   4 0.48326 0.63467   2
  -5  -6   4 0.28316 0.39199   5
   6  -5   4 0.73232 1.50399   6
  -5  -6   4 0.78065 1.64339   1
  -6   5   4 0.43197 2.09944   4
  -6   5   4 -0.1350 2.93037   6
   6  -6  -4 269.947 22.5136   1
   6  -6  -4 264.786 21.8849   2
  -6   6  -4 247.203 21.8596   2
   6  -6   4 238.430 21.8499   2
  -6   6   4 229.123 23.1336   4
  -6   6   4 211.975 23.8807   6
  -6   6   4 264.444 21.9794   2
   6  -6   4 247.897 22.9883   6
   7   6  -4 0.86905 1.20904   6
   6  -7  -4 0.53175 0.73985   5
  -6   7  -4 -0.2930 1.10362   1
   6  -7  -4 0.26294 0.47461   1
   6  -7  -4 0.57494 0.42958   2
  -6   7  -4 0.48005 0.49582   2
   6  -7   4 0.64612 1.16594   6
  -6   7   4 -3.2023 1.24490   4
  -6   7   4 -0.0859 0.43091   2
  -7  -6   4 -0.7670 1.02449   1
  -6   7   4 1.67029 2.20669   6
   6  -7   4 0.15900 0.35976   2
   5  -7  -4 150.722 13.1852   1
  -5   7  -4 138.762 12.4986   2
   5  -7  -4 121.846 12.7949   5
   5  -7  -4 167.599 12.5380   2
  -5   7  -4 129.120 13.4693   4
  -5   7   4 127.927 14.5700   6
   5  -7   4 140.275 12.4796   2
  -5   7   4 112.709 13.5441   4
   5  -7   4 138.299 13.4748   6
  -5   7   4 149.390 12.5572   2
   4  -7  -4 4.97596 1.41214   1
  -4   7  -4 7.61423 1.13433   2
  -4   7  -4 2.02457 1.84495   1
   4  -7  -4 4.74645 1.33623   5
   7   4  -4 21.0206 3.14016   6
   4  -7  -4 6.66459 1.10553   2
  -4   7  -4 3.86655 1.96285   4
  -4   7   4 7.37953 2.71100   4
   4  -7   4 6.34759 1.72592   1
  -4   7   4 5.20390 2.91966   6
   4  -7   4 5.57232 1.02289   2
  -4   7   4 5.25667 1.14428   2
   4  -7   4 7.80503 2.26620   6
   3  -7  -4 59.9039 6.56200   1
  -3   7  -4 58.6335 5.83472   2
  -3   7  -4 58.2448 7.16841   4
   3  -7  -4 59.8145 5.75350   2
  -3   7  -4 70.0450 8.61113   6
   3  -7  -4 51.5130 6.06095   5
   3  -7   4 57.5047 6.93413   6
  -7  -3   4 68.2136 5.65281   5
   3  -7   4 63.1786 5.83493   2
  -3   7   4 77.1037 9.78916   6
  -3   7   4 67.8359 8.13010   4
  -3   7   4 61.0543 5.93130   2
   3  -7   4 72.2976 7.13056   1
  -2   7  -4 19.5933 3.40545   4
  -2   7  -4 16.1114 3.77521   6
   2  -7  -4 11.9699 2.05196   5
   2  -7  -4 12.5748 2.52582   1
   7   2  -4 23.6609 3.44578   6
  -2   7  -4 14.2243 1.91921   2
   2  -7  -4 14.9249 1.76571   2
  -2   7   4 16.9991 3.63235   4
   2  -7   4 14.0425 3.00613   6
   2  -7   4 10.9813 2.09493   5
  -2   7   4 15.0931 3.90401   6
  -7  -2   4 15.7523 1.83090   5
   2  -7   4 12.9492 1.83818   2
   2  -7   4 16.9443 3.52727   1
   1  -7  -4 304.401 28.9846   5
   1  -7  -4 330.126 29.8502   1
  -1   7  -4 360.886 28.9095   2
   1  -7  -4 329.684 28.6589   2
  -1   7   4 381.762 30.5148   4
   1  -7   4 305.886 30.8020   1
   1  -7   4 266.547 29.1169   5
   1  -7   4 359.121 28.9010   2
  -7  -1   4 342.838 28.7582   2
  -1   7   4 371.013 31.1123   6
   0   7  -4 -0.5590 0.42565   2
   0  -7  -4 0.22815 0.74997   1
   0  -7  -4 -0.3602 0.37850   5
   0   7  -4 1.21022 1.56118   4
   0   7  -4 0.59619 1.70303   6
   7   0  -4 -0.2512 1.23508   6
   0  -7   4 0.29409 0.52715   2
   0   7   4 0.93789 1.84487   6
   0   7   4 1.72718 2.19839   4
  -7   0   4 -0.3791 0.60911   2
  -7   0   4 0.65712 2.10775   1
   0  -7   4 0.39090 1.15747   1
   0  -7   4 -0.0713 0.64309   5
  -1  -7  -4 378.799 33.9674   1
   1   7  -4 367.855 32.7728   2
  -1  -7   4 378.791 32.7600   2
  -7   1   4 382.790 32.8530   2
   2   7  -4 32.5230 4.35551   6
   7  -2  -4 14.8534 2.95722   6
   7  -2  -4 14.3975 1.86856   2
  -2  -7   4 14.9503 1.75952   2
  -7   2   4 19.3526 5.37595   1
  -7   2   4 10.9764 1.82847   2
   7  -2   4 11.5881 2.85091   6
  -2  -7   4 10.4902 1.86764   5
   7  -3  -4 82.3232 7.28273   6
   7  -3  -4 58.8957 5.83235   2
  -7   3   4 94.8230 10.4454   1
  -7   3   4 57.9181 7.52004   4
  -7   3   4 66.7632 6.01301   2
  -3  -7   4 60.2488 5.67986   2
   7  -3   4 61.5757 7.01817   6
  -3  -7   4 50.3984 5.83966   5
   4   7  -4 28.4547 4.02025   6
   7  -4  -4 7.84209 1.27217   2
   7  -4  -4 10.2298 2.32228   6
  -7   4   4 10.9364 4.07385   1
   7  -4   4 7.10988 2.29777   6
  -7   4   4 5.81586 2.60469   4
  -7   4   4 10.5824 1.62226   2
  -4  -7   4 4.43421 0.96978   5
   7  -5  -4 155.986 14.0281   2
  -7   5  -4 138.702 13.8875   2
   7  -5  -4 194.888 15.1124   6
  -7   5   4 174.305 14.1800   2
  -7   5   4 151.517 15.2485   4
   7  -5   4 150.911 15.0675   6
  -7   6  -4 0.58346 1.18663   1
   6   7  -4 0.03259 1.18479   6
   7  -6  -4 -0.4096 1.01285   6
   7  -6  -4 -0.4595 0.36338   2
  -7   6  -4 0.46363 0.45986   2
  -7   6   4 0.44504 0.55275   2
  -7   6   4 0.62544 1.51561   1
   7  -6   4 -0.4635 1.04904   6
  -6  -7   4 0.77951 1.28097   1
  -7   6   4 -0.9711 1.48463   4
   7  -6   4 0.40166 0.41313   2
   7  -7  -4 109.066 9.16061   2
  -7   7  -4 106.455 9.11823   2
   7  -7   4 97.9515 9.12596   2
   7  -7   4 103.214 9.84479   6
  -7   7   4 99.1219 9.94687   4
  -7   8  -4 0.00386 0.69829   1
  -7   8  -4 0.26311 0.30722   2
   7  -8  -4 0.17776 0.26263   2
   8   7  -4 0.81313 0.79935   6
   7  -8   4 0.25880 0.69719   6
  -7   8   4 0.24902 0.86294   4
  -7   8   4 0.44192 0.32420   2
   7  -8   4 1.00289 0.30549   2
   6  -8  -4 85.2489 6.87705   2
  -6   8  -4 71.3867 6.85671   2
   6  -8  -4 83.9713 7.28174   1
   6  -8   4 79.1104 6.87133   2
  -6   8   4 77.9971 6.92196   2
   6  -8   4 73.9276 7.45247   6
  -6   8   4 70.5537 7.67393   4
  -6   8   4 58.7773 8.01079   6
  -5   8  -4 1.51859 0.54875   2
  -5   8  -4 0.36225 1.44067   4
  -5   8  -4 0.14890 1.08249   1
   5  -8  -4 1.32307 0.67477   1
   5  -8  -4 1.17803 0.66933   5
   8   5  -4 4.67585 1.45733   6
   5  -8  -4 1.07963 0.46936   2
  -5   8   4 0.16948 1.39136   4
   5  -8   4 0.95778 0.41033   2
  -8  -5   4 5.89276 2.05986   1
  -5   8   4 0.32107 1.78166   6
  -5   8   4 1.94819 0.58364   2
   5  -8   4 0.57831 1.09047   6
   4  -8  -4 101.186 7.97330   2
   4  -8  -4 86.3452 8.57547   1
  -4   8  -4 84.3945 7.99288   2
  -4   8  -4 87.3258 8.94940   4
   4  -8  -4 87.6280 8.25903   5
  -4   8   4 84.8926 9.16030   4
  -4   8   4 81.7145 8.00533   2
  -4   8   4 77.3568 9.80292   6
   4  -8   4 90.4380 7.96631   2
   4  -8   4 84.1649 8.77974   6
   4  -8   4 98.4447 8.83682   1
   3  -8  -4 6.97395 1.01709   2
  -3   8  -4 4.19315 1.84142   4
  -3   8  -4 8.23405 2.71680   6
  -3   8  -4 3.54789 0.93673   2
   3  -8  -4 6.82812 1.33143   5
   3  -8  -4 5.91949 1.53497   1
   8   3  -4 15.7090 2.56860   6
  -3   8   4 6.37905 1.21373   2
   3  -8   4 6.44787 2.00092   6
   3  -8   4 9.15217 2.06086   1
  -3   8   4 6.06410 2.72522   6
  -3   8   4 6.30639 2.29455   4
   3  -8   4 6.37801 1.04774   2
   2  -8  -4 94.0943 9.61473   1
  -2   8  -4 102.520 9.91942   4
  -2   8  -4 106.865 10.5673   6
   2  -8  -4 87.8986 8.98862   5
   2  -8  -4 100.749 8.74111   2
  -2   8  -4 101.054 8.94678   2
  -2   8   4 77.5798 10.5056   6
  -2   8   4 101.678 10.2922   4
   2  -8   4 125.338 10.5905   1
   2  -8   4 92.4761 8.83659   2
   1  -8  -4 12.2831 2.37980   1
  -1   8  -4 11.7544 1.72507   2
   8   1  -4 26.1734 3.54293   6
  -1   8  -4 16.8055 3.48163   6
   1  -8  -4 13.5658 1.68997   5
  -1   8  -4 15.5604 2.77379   4
  -1   8   4 13.6253 3.02955   4
  -1   8   4 15.7922 3.72592   6
   1  -8   4 13.5635 1.70589   2
   1  -8   4 9.43938 1.90439   5
   1  -8   4 14.2482 3.19889   1
   0  -8  -4 187.697 17.1758   1
   0   8  -4 189.224 16.2693   2
  -8   0   4 200.036 16.2093   2
   0   8   4 220.247 18.3716   6
   0  -8   4 148.737 17.7724   1
   0  -8   4 147.633 16.4160   5
   0  -8   4 199.352 16.2283   2
   0   8   4 211.173 17.7379   4
   1   8  -4 21.1449 3.65613   6
  -1  -8  -4 14.4267 2.69394   1
   1   8  -4 34.0669 3.90898   4
   1   8  -4 11.6864 1.71180   2
  -1  -8   4 14.7258 1.70578   2
  -1  -8   4 9.77107 1.77766   5
  -8   1   4 36.3781 6.51844   1
   1   8   4 18.6662 3.75639   6
  -1  -8   4 7.59449 2.60506   1
   8  -2  -4 93.7891 8.24090   2
   8  -2  -4 97.1096 9.35906   6
   8  -2   4 87.0414 9.17033   6
  -8   2   4 102.118 8.39267   2
  -2  -8   4 74.8654 8.29126   5
  -2  -8   4 95.4844 8.12275   2
   3   8  -4 19.3094 3.36403   6
   8  -3  -4 4.75080 0.93512   2
   3   8  -4 21.2182 3.15280   4
   8  -3  -4 10.3293 2.41505   6
  -8   3  -4 1.15449 1.82095   1
  -3  -8   4 4.82600 0.91844   5
  -8   3   4 7.50717 1.29753   2
   8  -3   4 7.24799 2.16499   6
  -8   3   4 14.7250 4.07967   1
   8  -4  -4 87.9586 8.98932   2
   8  -4  -4 126.761 10.1265   6
  -8   4   4 105.287 9.14753   2
   8  -4   4 94.5092 9.93861   6
   8  -5  -4 0.97910 0.44182   2
   8  -5  -4 0.34893 1.00175   6
  -8   5  -4 -0.3037 0.99447   1
   5   8  -4 2.28396 1.46849   6
   8  -5   4 1.11948 1.16763   6
  -8   5   4 0.98406 0.61669   2
  -8   5   4 0.45480 1.34874   1
   8  -6  -4 79.1566 7.34452   2
   8  -6   4 84.8186 8.09461   6
  -8   6   4 85.6066 7.42063   2
  -8   7  -4 0.18061 0.69908   1
   7   8  -4 1.16359 0.93408   6
   8  -7  -4 0.09981 0.23867   2
   8  -7   4 1.23660 0.78039   6
  -8   7   4 0.22355 0.33138   2
  -8   8  -4 20.3403 3.17001   1
   8  -8  -4 29.9991 2.53594   2
  -8   8   4 32.9739 2.57715   2
   8  -8   4 27.7001 3.23285   6
  -7   9   4 19.4822 1.84034   2
   6  -9  -4 0.23812 0.31179   1
  -6   9  -4 0.94619 1.02323   1
  -6   9  -4 0.37996 0.26562   2
   9   6  -4 1.06730 0.78867   6
   6  -9  -4 -0.1170 0.21385   2
   6  -9   4 -0.0682 0.20211   2
  -9  -6   4 0.22997 0.82199   1
  -6   9   4 -0.0653 0.26647   2
  -6   9   4 -0.2263 0.80771   4
   5  -9  -4 78.9168 5.97476   2
  -5   9  -4 65.2136 6.01710   2
  -5   9  -4 52.8547 7.51609   4
   5  -9  -4 71.1534 6.38416   1
  -5   9   4 52.6460 7.02156   6
  -5   9   4 60.3364 6.71154   4
   5  -9   4 66.7620 5.98393   2
  -5   9   4 64.9987 6.03965   2
   4  -9  -4 0.54874 0.53963   5
  -4   9  -4 0.67111 1.17712   4
   9   4  -4 3.54238 1.25468   6
  -4   9  -4 1.75276 0.51301   2
   4  -9  -4 1.43504 0.64471   1
   4  -9  -4 1.75853 0.43756   2
   4  -9   4 1.65030 0.46164   2
  -9  -4   4 6.21143 2.07899   1
  -4   9   4 1.26583 0.50767   2
  -4   9   4 0.55514 1.20412   4
  -4   9   4 1.54000 1.73783   6
  -3   9  -4 118.721 12.4742   6
  -3   9  -4 129.077 11.2005   2
   3  -9  -4 120.578 11.2275   5
   3  -9  -4 128.300 11.7423   1
  -3   9  -4 122.035 11.9977   4
   3  -9   4 121.964 11.1078   2
   3  -9   4 143.140 12.0487   1
  -3   9   4 106.669 12.6112   6
  -3   9   4 130.557 11.2307   2
  -3   9   4 130.044 12.2445   4
  -2   9  -4 2.98651 1.51392   4
  -2   9  -4 0.33299 1.48072   6
   9   2  -4 3.58805 1.41571   6
   2  -9  -4 2.01691 0.54852   5
  -2   9  -4 2.88770 0.71452   2
   2  -9  -4 2.89702 1.01860   1
  -2   9   4 1.69359 1.82765   6
  -2   9   4 5.66894 1.97841   4
   2  -9   4 1.37351 0.99374   1
  -9  -2   4 14.5539 3.56299   1
   2  -9   4 2.51023 0.58250   2
   2  -9   4 2.05597 0.78819   5
  -1   9  -4 117.823 10.5996   6
   1  -9  -4 92.5647 9.57452   1
  -1   9  -4 89.7831 8.97992   2
  -1   9  -4 121.549 10.0863   4
   1  -9   4 113.142 10.3865   1
   1  -9   4 97.9958 8.88421   2
  -1   9   4 100.968 10.1784   4
  -1   9   4 91.6838 10.5949   6
   0   9  -4 -0.2064 0.42564   2
   9   0  -4 0.55849 1.11256   6
   0   9  -4 -0.7147 1.31358   6
   0  -9  -4 0.05845 0.56255   1
   0   9  -4 0.94651 1.34051   4
   0   9   4 0.32770 1.58029   4
   0  -9   4 0.03254 0.81855   1
   0  -9   4 0.24086 0.37283   2
   0   9   4 0.40500 1.41868   6
  -9   0   4 -0.2530 1.53801   1
  -9   0   4 0.15767 0.29277   5
   0  -9   4 -0.0665 0.57616   5
  -1  -9  -4 99.4489 9.25860   1
   1   9  -4 110.121 8.74046   2
  -1  -9   4 86.8042 8.30309   2
  -1  -9   4 77.8039 9.73029   1
   1   9   4 123.186 10.4613   6
   2   9  -4 3.29399 1.74290   6
   2   9  -4 5.42457 1.83179   4
   9  -2  -4 2.19044 1.26850   6
  -9   2  -4 1.73828 1.77570   1
  -2  -9  -4 3.05365 1.12218   1
  -2  -9   4 1.69469 0.56437   5
  -9   2   4 10.8582 3.39568   1
   2   9   4 2.39989 1.69072   6
   9  -2   4 4.00043 1.41740   6
  -2  -9   4 2.06777 1.35827   1
   9  -3  -4 131.377 11.4440   2
   9  -3   4 128.028 12.1925   6
   9  -4  -4 1.16448 0.44467   2
   9  -4  -4 0.58833 0.93006   6
   4   9  -4 4.27310 1.61676   4
  -9   4  -4 0.08137 1.17324   1
   4   9  -4 4.89638 1.78263   6
   9  -4   4 3.40628 1.24788   6
  -9   4   4 4.63334 1.99152   1
   9  -5  -4 77.4460 6.94416   2
  -9   5   4 81.4453 6.97210   2
   9  -5   4 75.5053 7.53030   6
  -9   6  -4 0.09115 0.85404   1
   6   9  -4 0.03172 0.80703   6
   9  -6  -4 -0.2223 0.59524   6
   9  -6  -4 0.29247 0.22410   2
  -9   6   4 0.37933 0.85147   1
  -6  -9   4 -0.1539 0.59695   1
  -9   6   4 0.61415 0.35009   2
   9  -6   4 0.42558 0.70379   6
  -9   7  -4 15.5227 2.46932   1
   9  -7  -4 22.0974 1.92086   2
   9  -7   4 23.5273 2.28959   6
  -5  10  -4 -0.1062 0.22361   2
   5 -10  -4 -0.0703 0.22231   1
  -5  10   4 0.65026 1.03051   6
   5 -10   4 -0.0390 0.17689   2
  -5  10   4 0.50746 0.74593   4
  -5  10   4 -0.1140 0.23381   2
  -4  10  -4 95.3408 8.24690   2
   4 -10  -4 101.903 8.56951   1
  -4  10  -4 81.9912 8.70678   4
  -4  10   4 83.9158 9.17090   6
   4 -10   4 95.3696 8.19605   2
  -4  10   4 96.4871 8.26655   2
  -4  10   4 85.0747 8.80609   4
  -3  10  -4 0.34981 0.94493   4
  10   3  -4 1.66504 0.80848   6
  -3  10  -4 0.45349 0.32878   2
  -3  10  -4 0.84641 1.47112   6
   3 -10  -4 0.89138 0.48977   1
  -3  10   4 -0.1213 0.93954   4
  -3  10   4 0.26756 1.40196   6
 -10  -3   4 4.20681 1.59290   1
   3 -10   4 0.23924 0.25717   2
   3 -10   4 -0.0137 0.41627   1
  -2  10  -4 118.449 11.1331   6
  -2  10  -4 114.922 10.6956   4
   2 -10  -4 113.783 10.4187   1
  -2  10  -4 115.281 10.0069   2
   2 -10   4 108.521 9.88011   2
   2 -10   4 130.681 10.7236   1
  -2  10   4 88.4710 11.0341   6
  -2  10   4 104.121 10.7608   4
  -1  10  -4 2.06940 1.24598   4
  10   1  -4 5.84709 1.47407   6
  -1  10  -4 3.15820 0.66536   2
   1 -10  -4 2.20143 0.79353   1
  -1  10  -4 2.21875 1.51632   6
   1 -10   4 2.32701 0.44048   2
  -1  10   4 0.84135 1.32983   4
  -1  10   4 3.57389 1.77954   6
   1 -10   4 2.63846 0.99978   1
   0  10  -4 65.9373 5.97612   2
   0 -10  -4 63.2232 6.40119   1
   0  10  -4 79.5768 6.81980   4
   0  10  -4 62.3075 7.02394   6
   0  10   4 56.3688 7.15239   6
   0 -10   4 68.8416 6.83633   1
   0  10   4 70.0520 6.93809   4
   1  10  -4 6.29023 1.80497   6
   1  10  -4 3.38205 1.31635   4
  -1 -10  -4 2.55914 0.89984   1
  10  -1  -4 5.36811 1.39552   6
   1  10   4 3.30221 1.76579   6
 -10   1   4 11.6851 3.06232   1
  -1 -10   4 3.25892 1.22822   1
 -10   2  -4 103.519 11.8168   1
  -2 -10  -4 119.367 10.7490   1
  10  -2   4 112.370 10.6964   6
  -2 -10   4 125.854 11.4252   1
   2  10   4 122.524 11.4279   6
  10  -3  -4 0.49452 0.73778   6
   3  10  -4 0.61356 0.97880   4
   3  10  -4 0.41805 1.02152   6
 -10   3  -4 0.22597 1.06105   1
 -10   3   4 2.93320 1.54082   1
  10  -3   4 1.27078 0.84113   6
  -3 -10   4 0.96258 0.81751   1
  10  -4  -4 104.271 9.37640   2
  -4 -10   4 103.023 10.2599   1
  10  -4   4 116.914 9.88249   6
   5  10  -4 -0.1764 0.68660   6
  10  -5  -4 -0.2340 0.50230   6
  10  -5  -4 0.05064 0.20465   2
 -10   5  -4 0.01905 0.73730   1
 -10   5   4 0.10035 0.70482   1
  10  -5   4 0.36204 0.52935   6
  -5 -10   4 -0.4714 0.41706   1
   3 -11  -4 60.3533 5.07995   1
  -3  11  -4 57.8843 5.08704   2
  -3  11   4 45.6244 5.20413   4
  -3  11   4 47.6707 5.50118   6
  -2  11  -4 0.35556 1.52393   6
  -2  11  -4 1.56618 0.81283   4
   2 -11  -4 0.54696 0.34048   1
  11   2  -4 1.25674 0.62264   6
  -2  11  -4 0.51107 0.29533   2
  -2  11   4 0.47798 0.95308   6
  -2  11   4 1.47709 0.84121   4
   2 -11   4 0.48798 0.40198   1
 -11  -2   4 3.05885 1.19783   1
  -1  11  -4 51.4289 5.32069   4
   1 -11  -4 54.8198 5.08208   1
  -1  11  -4 52.8707 5.60215   6
  -1  11  -4 53.0193 4.82304   2
  -1  11   4 45.7179 5.60583   6
  -1  11   4 48.5910 5.33462   4
   1 -11   4 60.4014 5.25457   1
   0 -11  -4 -0.1671 0.26360   1
   0  11  -4 0.31562 0.90508   6
  11   0  -4 -0.5274 0.53914   6
   0  11  -4 -0.5389 0.31285   2
   0  11  -4 -0.0886 0.74773   4
   0  11   4 -0.1777 0.89667   6
   0  11   4 -0.1272 0.92966   4
   0 -11   4 0.23801 0.39264   1
 -11   0   4 0.67530 1.05417   1
  -1 -11  -4 54.5072 5.50376   1
   1  11  -4 65.7292 6.11160   6
   1  11  -4 67.7811 5.85048   4
  -1 -11   4 63.4747 5.79040   1
   1  11   4 51.4431 6.01794   6
   2  11  -4 0.82887 0.84243   6
   2  11  -4 1.01654 0.75994   4
  11  -2  -4 1.10364 0.64845   6
  -2 -11   4 0.33918 0.46658   1
 -11   2   4 3.03838 1.29506   1
   3  11  -4 85.4750 7.64529   6
  -3 -11   4 76.8512 7.42932   1
   0   0  -5 0.14289 0.67056   5
   1   0  -5 -0.9644 0.57203   5
   0   1  -5 -0.2186 0.52166   5
   0  -1  -5 -0.2621 0.51466   5
  -1   0  -5 0.59386 0.46372   5
   0  -1   5 0.61471 0.48405   3
  -1   0   5 -0.0138 0.42290   3
   1  -1  -5 0.33954 0.81024   5
  -1  -1  -5 0.19727 0.31754   5
   1  -1  -5 0.10806 0.44626   3
  -1   1  -5 -0.2021 0.47938   5
  -1  -1   5 0.36133 0.42184   3
   1  -2  -5 20.3665 1.90779   3
   1  -2  -5 13.9780 2.21869   5
  -1   2  -5 21.0766 1.98289   5
  -2  -1   5 13.2410 1.96794   3
   0  -2  -5 -0.7370 0.50474   5
   2   0  -5 -0.8324 0.78042   5
   0  -2  -5 -0.3481 0.35137   3
   2   0  -5 -0.2817 0.47735   3
   0   2  -5 -0.9416 0.47769   5
  -2   0   5 -0.5576 0.48110   3
   2  -1  -5 16.9370 2.48565   5
   2  -1  -5 19.1157 1.96729   3
  -1  -2   5 18.1667 1.92382   3
  -2   1   5 15.4970 2.18943   3
   2  -2  -5 0.45933 0.82192   5
   2  -2  -5 -0.1961 0.51630   3
  -2  -2   5 -0.4660 0.35841   3
   2  -3  -5 6.04097 1.15913   3
   2  -3  -5 6.99458 1.64891   5
  -3  -2   5 5.29856 1.10936   3
   1  -3  -5 -0.9490 0.60713   5
  -1   3  -5 0.42964 0.58970   5
   1  -3  -5 -0.0674 0.36782   3
  -3  -1   5 -0.3797 0.53672   3
   0  -3  -5 -0.6364 0.46745   5
   0  -3  -5 -0.3631 0.25875   3
   3   0  -5 0.44419 0.88861   5
   0   3  -5 -0.5163 0.52961   5
   1   3  -5 0.66000 0.63867   5
   3  -1  -5 0.16794 0.89403   5
  -1  -3   5 0.63583 0.79931   5
   3  -2  -5 6.65321 1.65974   5
  -2  -3   5 4.91506 1.39222   5
   3  -3  -5 0.56685 0.92330   5
  -3  -3   5 1.19708 0.87087   5
   3  -4  -5 5.42666 1.52256   5
   3  -4  -5 4.43261 1.52362   1
   3  -4  -5 3.87200 0.98352   2
  -3   4  -5 5.72961 1.15679   2
  -3   4  -5 0.22919 1.90756   1
   4   3  -5 10.5468 2.69896   6
  -4  -3   5 11.8274 3.84282   1
   3  -4   5 4.97356 2.34600   6
  -4  -3   5 5.19570 1.19599   5
  -3   4   5 10.7242 3.64543   4
   3  -4   5 3.79355 1.62455   4
  -4  -3   5 3.87258 0.95503   2
  -3   4   5 5.18757 3.75249   6
   2  -4  -5 -0.5423 0.75026   5
   1  -4  -5 2.57345 0.96157   5
   1  -4  -5 0.34181 0.40361   3
   0  -4  -5 -0.6242 0.47404   5
   0   4  -5 0.13316 0.52246   5
   0  -4  -5 -0.3087 0.26910   3
   0  -4   5 0.58231 0.79444   5
  -1  -4   5 0.56010 0.88238   5
   4  -2  -5 -0.7441 0.89747   5
  -2  -4   5 0.06315 0.71395   5
   4  -3  -5 5.18157 1.57476   5
   3   4  -5 15.5070 3.26227   6
   4  -3  -5 3.36289 1.22573   1
   4  -3  -5 5.40269 1.12603   2
  -3  -4   5 5.58649 1.09237   2
  -3  -4   5 4.10466 1.15659   5
  -4   3   5 6.95109 3.22610   4
  -4   3   5 3.88101 1.22275   2
  -3  -4   5 12.0120 3.83685   1
  -4   3   5 8.44294 4.54116   6
  -4   4  -5 0.35848 0.65244   2
   4  -4  -5 -0.1743 0.49556   2
   4  -4  -5 0.31175 0.63451   1
   4  -4  -5 0.75094 0.90199   5
   4   4  -5 0.91587 1.67037   6
  -4   4  -5 0.42241 1.73079   1
   4  -4  -5 0.10422 1.49180   6
   4  -4   5 -0.5582 1.66131   6
  -4  -4   5 0.81229 0.68105   5
  -4   4   5 -2.3579 2.26141   4
  -4  -4   5 -0.1664 0.53135   2
  -4  -4   5 0.44476 1.87850   1
   4  -4   5 -0.1703 0.92854   4
  -4   4   5 -0.3370 2.24489   1
  -4   4   5 1.37491 3.32699   6
  -4   4   5 0.86276 0.82473   2
  -4   5  -5 -1.3011 1.98571   4
   4  -5  -5 0.94713 0.79831   1
   4  -5  -5 1.40265 0.99588   5
   5   4  -5 3.03673 1.77915   6
  -4   5  -5 0.68848 0.62689   2
  -4   5  -5 -0.1406 1.59800   1
   4  -5  -5 1.10110 0.65025   2
  -4   5   5 0.53848 3.10514   6
  -5  -4   5 1.09347 0.57777   2
  -4   5   5 -1.0219 2.21220   4
  -5  -4   5 1.17873 0.66618   5
  -5  -4   5 3.39252 2.47970   1
   4  -5   5 0.69540 0.72791   2
   4  -5   5 1.72742 1.65899   6
  -4   5   5 0.31982 0.65998   2
   3  -5  -5 -0.0576 0.57226   2
  -3   5  -5 -0.5331 0.53518   2
  -3   5  -5 -0.9609 1.35823   1
   3  -5  -5 0.90930 0.89334   5
   3  -5  -5 0.14459 0.65020   1
  -3   5  -5 0.31779 1.72831   4
   5   3  -5 2.38159 1.62482   6
  -3   5   5 0.65507 2.67797   6
   3  -5   5 0.58477 1.12813   4
  -5  -3   5 -0.3430 0.49459   2
  -3   5   5 1.28370 2.30612   4
  -5  -3   5 -0.8415 1.61336   1
  -5  -3   5 0.13835 0.58588   5
   3  -5   5 0.00975 1.56926   6
  -3   5   5 -0.6636 0.82362   2
   3  -5   5 0.21699 0.56585   2
  -2   5  -5 4.89826 2.60295   6
  -2   5  -5 2.34114 0.76738   2
   5   2  -5 5.81507 2.26175   6
   2  -5  -5 3.32571 1.30744   1
   2  -5  -5 2.78850 1.09759   5
   2  -5  -5 2.48716 0.77468   2
  -2   5  -5 3.97068 2.14245   4
  -2   5  -5 0.86527 1.82252   1
   2  -5   5 2.37798 0.84083   2
  -5  -2   5 2.61591 0.78877   2
  -2   5   5 1.57577 2.82450   6
  -5  -2   5 4.46535 2.84411   1
   2  -5   5 2.63615 1.34642   4
   2  -5   5 2.19728 1.96367   6
   2  -5   5 2.33441 2.08368   6
   2  -5   5 -0.1712 1.50264   1
  -2   5   5 0.47976 2.34369   4
   1  -5  -5 0.13547 0.62484   5
  -1   5  -5 0.35040 0.57820   2
   5   1  -5 -0.2795 1.54049   6
  -1   5  -5 -0.8560 2.02368   6
  -1   5  -5 -3.0292 1.76001   4
  -1   5  -5 -0.4266 1.79990   1
   1  -5  -5 -0.2991 0.33201   3
   1  -5   5 -0.7530 1.06212   4
  -5  -1   5 0.00698 0.70434   2
   1  -5   5 0.89328 1.65510   1
   1  -5   5 0.25957 0.54846   2
  -5  -1   5 -0.2382 2.01857   1
   1  -5   5 1.22346 1.92702   6
   0  -5  -5 0.13431 0.46173   5
   0  -5  -5 0.02278 0.23170   3
   0   5  -5 0.59957 0.65620   2
   5   0  -5 0.62832 1.56468   6
   0   5  -5 0.31249 1.99184   6
   0  -5   5 -1.7650 1.10181   4
   0  -5   5 -0.2297 0.69172   5
  -5   0   5 0.48487 2.23482   1
   0  -5   5 0.39704 0.61126   2
  -5   0   5 1.14596 0.84337   2
   5  -1  -5 0.58612 1.54737   6
   1   5  -5 0.09982 1.99530   6
   5  -1  -5 -0.6336 0.55906   2
  -5   1   5 -1.3467 2.09185   4
  -5   1   5 0.30123 0.68310   2
  -1  -5   5 1.15498 1.25780   4
  -1  -5   5 -0.2355 0.61203   5
  -1  -5   5 0.43514 0.59074   2
  -5   1   5 -0.5654 1.88762   1
   5  -2  -5 1.16133 0.86214   1
   2   5  -5 8.56526 2.67374   6
   5  -2  -5 2.08372 0.83479   2
   5  -2  -5 3.77468 1.96422   6
   2   5  -5 3.04364 0.86696   2
  -2  -5   5 0.72873 1.97681   1
  -2  -5   5 1.19183 0.81506   5
  -5   2   5 1.40869 2.34273   4
  -2  -5   5 2.05185 0.73223   2
  -5   2   5 2.22263 0.93887   2
  -5   2   5 0.91175 3.79743   6
  -5   2   5 0.72328 2.40329   1
  -2  -5   5 3.38941 1.49632   4
   5  -3  -5 0.77260 0.69930   2
   5  -3  -5 -0.9707 1.38652   6
  -5   3  -5 -0.7122 0.63380   2
   3   5  -5 -0.4202 1.51839   6
   5  -3  -5 0.11099 0.57245   1
  -5   3  -5 -0.4774 1.40553   1
  -5   3   5 -0.1141 0.67926   2
  -5   3   5 0.11550 2.60331   1
  -3  -5   5 -0.3283 1.58504   1
  -5   3   5 -1.5532 2.15435   4
  -5   3   5 -3.3008 3.09246   6
  -3  -5   5 -0.0954 0.55791   5
  -3  -5   5 -0.0052 0.53354   2
   5  -3   5 0.58068 1.59142   6
  -5   4  -5 -1.1257 1.19040   1
   4   5  -5 2.93935 1.89191   6
   5  -4  -5 2.23644 1.19267   5
  -5   4  -5 1.07380 0.69024   2
   5  -4  -5 0.11490 0.59190   2
   5  -4  -5 0.44742 0.64203   1
   5  -4  -5 0.61578 1.47287   6
  -5   4   5 1.17862 2.21066   4
  -5   4   5 0.87246 3.08104   6
  -5   4   5 2.15515 2.84140   1
  -4  -5   5 0.43723 0.56480   2
  -4  -5   5 2.08652 2.22060   1
  -5   4   5 1.79144 0.86075   2
   5  -4   5 0.97867 1.70963   6
  -4  -5   5 1.27683 0.71122   5
   5  -5  -5 0.50902 0.55171   2
  -5   5  -5 -0.4396 1.37767   1
   5  -5  -5 -0.1062 0.54434   1
   5   5  -5 0.35076 1.46205   6
   5  -5  -5 0.14081 1.28451   6
   5  -5  -5 0.08399 0.79067   5
  -5   5  -5 -0.0819 0.55872   2
  -5   5   5 0.63961 2.22926   1
  -5  -5   5 -0.3008 0.45258   5
  -5  -5   5 0.13997 0.47115   2
  -5   5   5 0.56320 2.00626   4
  -5   5   5 -0.4978 0.57251   2
   5  -5   5 0.29580 1.50374   6
  -5  -5   5 -0.3131 1.38989   1
  -5   5   5 0.79772 2.89943   6
   5  -5   5 0.20542 0.57539   2
   6   5  -5 -0.2903 1.34949   6
   5  -6  -5 -0.0559 0.50891   1
  -5   6  -5 0.31664 1.50287   1
   5  -6  -5 -0.7070 0.47867   2
   5  -6  -5 -0.3847 0.73994   5
  -5   6  -5 0.12180 0.55205   2
  -6  -5   5 -0.0683 0.37728   5
  -5   6   5 0.04164 0.60941   2
  -6  -5   5 0.92797 1.70241   1
   5  -6   5 0.50102 0.52200   2
  -5   6   5 2.22113 2.31125   4
  -5   6   5 1.43836 2.57120   6
   5  -6   5 -1.7111 1.35329   6
   4  -6  -5 -0.3859 0.45502   2
   4  -6  -5 1.17645 0.91442   5
  -4   6  -5 0.35381 0.59555   2
  -4   6  -5 0.70673 1.62973   1
   6   4  -5 0.38283 1.27181   6
  -4   6  -5 -1.9273 1.72058   4
   4  -6  -5 0.03664 0.57791   1
  -4   6   5 0.43676 0.59162   2
   4  -6   5 0.24339 0.51122   2
  -4   6   5 1.86239 2.18872   4
   4  -6   5 0.13680 1.53371   6
  -6  -4   5 -1.1893 1.30074   1
  -4   6   5 0.10003 2.82919   6
  -6  -4   5 -0.0875 0.47274   5
   3  -6  -5 0.19881 0.62594   1
  -3   6  -5 0.39163 1.56196   1
  -3   6  -5 -0.3650 0.54148   2
  -3   6  -5 0.86982 1.53315   4
   3  -6  -5 -1.0495 0.41433   2
   6   3  -5 0.30636 1.30130   6
  -3   6  -5 1.29450 2.37112   6
   3  -6  -5 -0.1854 0.70200   5
   3  -6   5 0.11051 1.01677   1
   3  -6   5 0.72504 1.45390   6
  -6  -3   5 1.90106 2.05292   1
  -3   6   5 -0.6421 0.73642   2
  -3   6   5 0.45901 2.35038   6
  -6  -3   5 -0.7872 0.43703   5
   3  -6   5 -1.2026 0.45053   2
  -3   6   5 0.31120 2.09536   4
  -6  -3   5 -0.3887 0.46400   2
  -2   6  -5 0.19769 1.70827   1
   2  -6  -5 0.25403 0.66988   5
  -2   6  -5 0.13705 1.62111   4
  -2   6  -5 0.75526 1.87900   6
   2  -6  -5 -0.1019 0.59758   1
   2  -6  -5 -0.4271 0.47231   2
  -2   6  -5 0.05944 0.53548   2
   6   2  -5 -1.1646 1.15611   6
   2  -6   5 -0.4156 0.52752   2
  -2   6   5 -0.0384 2.14579   6
  -6  -2   5 0.70950 0.54030   2
   2  -6   5 0.23813 1.50023   6
   2  -6   5 -0.0595 1.13589   1
  -6  -2   5 -0.0393 1.78016   1
  -2   6   5 -1.4958 2.03511   4
   2  -6   5 0.54533 0.95298   4
   1  -6  -5 -0.4288 0.50475   5
  -1   6  -5 4.25103 2.09613   4
   1  -6  -5 -0.1450 0.48117   2
  -1   6  -5 1.44013 0.63796   2
   1  -6  -5 0.23711 0.39731   3
   6   1  -5 0.16810 1.34082   6
  -1   6  -5 0.44406 1.70225   1
   1  -6  -5 0.34561 0.74946   1
  -1   6  -5 1.20596 1.91599   6
   1  -6   5 0.31989 0.78269   5
   1  -6   5 0.99146 1.12117   4
   1  -6   5 -0.0103 1.26133   1
  -1   6   5 2.02430 2.32461   6
  -6  -1   5 0.01582 0.58273   2
  -6  -1   5 2.19889 2.58337   1
   1  -6   5 1.51139 1.78426   6
   1  -6   5 -0.2859 0.52270   2
  -1   6   5 0.10286 2.05180   4
   0  -6  -5 0.29379 0.22494   3
   0   6  -5 -0.0908 1.49031   4
   0   6  -5 0.93402 1.72625   6
   0  -6  -5 0.06213 0.69770   1
   0   6  -5 0.74082 1.87005   1
   6   0  -5 -0.8699 1.34256   6
   0   6  -5 0.00432 0.49464   2
   6   0  -5 0.11313 0.50951   2
   0  -6  -5 -0.0249 0.37181   5
   0  -6   5 0.28695 0.70854   5
   0  -6   5 1.41392 1.96632   6
   0  -6   5 -0.1904 1.00207   4
  -6   0   5 0.29217 0.64509   2
   0   6   5 1.23296 2.32403   6
  -6   0   5 1.80778 2.37166   1
   0  -6   5 0.90852 0.59085   2
   1   6  -5 1.26398 1.77855   6
   6  -1  -5 0.97664 0.61902   2
   1   6  -5 0.49838 0.57503   2
  -1  -6   5 0.36087 0.49850   2
  -1  -6   5 -0.7173 1.12001   4
  -1  -6   5 0.74092 0.74790   5
  -6   1   5 0.62669 2.26740   1
  -6   1   5 -0.8241 1.86592   4
  -6   1   5 -0.1279 0.61749   2
   6  -2  -5 -0.0074 1.46414   6
   2   6  -5 -1.6885 1.37625   6
   6  -2  -5 0.04118 0.57232   2
  -6   2  -5 -0.9226 1.47350   1
   2   6  -5 -0.4008 0.50284   2
  -6   2   5 -0.3099 0.66103   2
   6  -2   5 -0.0015 1.66407   6
  -6   2   5 -0.3996 1.97199   4
  -6   2   5 0.83377 2.29137   1
  -2  -6   5 -0.3503 0.57177   5
  -2  -6   5 -0.0542 0.48480   2
   6  -3  -5 -0.1115 0.50992   2
   6  -3  -5 -0.0074 1.47788   6
   3   6  -5 -0.7146 1.49168   6
   6  -3  -5 0.49212 0.66770   1
  -6   3  -5 -1.2313 1.19956   1
   6  -3   5 -0.0973 1.40797   6
  -3  -6   5 -0.2799 0.52242   5
  -3  -6   5 -0.1904 0.45827   2
  -6   3   5 0.71047 2.04152   4
  -6   3   5 -0.5223 2.15028   1
  -3  -6   5 -0.1541 1.36455   1
  -6   3   5 -0.0551 3.43130   6
  -6   3   5 -0.2375 0.76113   2
   6  -4  -5 0.06411 0.53420   2
  -6   4  -5 -0.0023 1.28054   1
   6  -4  -5 -0.0944 0.50386   1
  -6   4  -5 -0.6529 0.51375   2
   4   6  -5 -0.4529 1.25194   6
   6  -4  -5 -0.6789 1.26896   6
  -6   4   5 -0.0816 0.62133   2
  -6   4   5 -4.6289 2.81496   6
   6  -4   5 -0.9075 1.35710   6
  -4  -6   5 -0.9193 1.20649   1
  -4  -6   5 0.49973 0.52921   5
  -6   4   5 0.13567 2.07580   4
  -6   4   5 0.16174 2.06637   1
  -4  -6   5 0.13811 0.43735   2
   5   6  -5 -0.2303 1.34614   6
   6  -5  -5 -0.0045 0.54314   1
  -6   5  -5 0.03407 1.43374   1
   6  -5  -5 0.27599 0.54813   2
   6  -5  -5 -0.7153 1.13824   6
  -6   5  -5 -0.1009 0.50826   2
  -5  -6   5 0.48636 1.47456   1
  -6   5   5 -1.0891 1.85451   1
  -5  -6   5 0.26433 0.46824   5
  -6   5   5 -2.3579 1.84357   4
  -6   5   5 2.86856 3.20421   6
  -6   5   5 -0.0632 0.67294   2
   6  -5   5 0.98742 1.49195   6
   6  -6  -5 -0.0861 0.44057   2
  -6   6  -5 0.41708 0.48873   2
   6   6  -5 0.56963 1.22073   6
   6  -6  -5 0.46388 0.57305   1
  -6   6  -5 0.18604 1.19888   1
   6  -6  -5 -0.3117 0.69572   5
  -6   6   5 -0.6287 1.77715   1
   6  -6   5 -0.0179 0.47368   2
   6  -6   5 0.94218 1.46464   6
  -6   6   5 -0.5780 0.52843   2
  -6   6   5 -0.3477 1.89412   4
  -6   6   5 1.26591 2.49862   6
  -6  -6   5 -0.2505 1.32628   1
  -6   7  -5 -0.2189 1.03018   1
   7   6  -5 -0.8799 0.95173   6
   6  -7  -5 -0.0469 0.40432   1
   6  -7  -5 -0.5787 0.36799   2
  -6   7  -5 0.45194 0.46114   2
   6  -7  -5 -0.6444 0.59618   5
  -6   7   5 -0.7264 1.95338   6
   6  -7   5 1.42425 1.28921   6
   6  -7   5 -0.1420 0.35182   2
  -6   7   5 0.06478 0.45822   2
  -7  -6   5 0.27213 1.13650   1
  -6   7   5 -0.8496 1.34004   4
  -5   7  -5 0.51365 0.50805   2
   7   5  -5 0.16337 1.13239   6
   5  -7  -5 0.64319 0.48786   2
   5  -7  -5 -0.2924 0.42251   1
  -5   7  -5 0.02997 1.22336   1
   5  -7  -5 -0.0489 0.68235   5
   5  -7   5 -0.0745 1.23300   6
   5  -7   5 -0.1644 0.40598   2
  -5   7   5 0.95521 2.22386   6
  -5   7   5 -0.3426 0.50374   2
  -5   7   5 -0.6972 1.68069   4
  -7  -5   5 0.69960 1.46791   1
   4  -7  -5 1.30810 0.80186   1
   4  -7  -5 1.09614 0.57981   2
  -4   7  -5 0.00215 1.31230   1
   7   4  -5 6.40320 1.92609   6
  -4   7  -5 0.70572 1.71737   4
   4  -7  -5 1.93560 0.89372   5
  -4   7  -5 1.62428 0.63952   2
  -4   7   5 0.20958 1.75338   4
  -7  -4   5 1.16520 0.35929   5
  -4   7   5 1.38177 0.71581   2
   4  -7   5 0.92694 0.55796   2
  -7  -4   5 2.27333 2.09683   1
   4  -7   5 1.68191 1.48753   6
  -4   7   5 -0.5254 2.45508   6
   7   3  -5 -1.1542 1.10236   6
   3  -7  -5 -0.1317 0.57446   1
  -3   7  -5 0.31159 1.68069   1
  -3   7  -5 1.30621 2.09559   6
   3  -7  -5 0.33025 0.49845   2
   3  -7  -5 1.06160 0.81115   5
  -3   7  -5 -0.2684 1.49204   4
  -3   7  -5 0.71865 0.57284   2
  -3   7   5 -1.5034 1.88718   4
  -7  -3   5 0.72868 1.77462   1
   3  -7   5 0.06538 0.89938   1
   3  -7   5 4.15438 1.74142   6
  -3   7   5 -0.1938 0.75170   2
  -3   7   5 -2.3770 1.73998   6
  -7  -3   5 0.23585 0.48909   5
   3  -7   5 0.26407 0.47615   2
  -2   7  -5 0.32120 1.55538   1
   2  -7  -5 1.82098 0.61438   2
   7   2  -5 4.36320 1.86775   6
   2  -7  -5 2.07491 1.07172   1
   2  -7  -5 2.96232 0.88952   5
  -2   7  -5 1.01498 1.48111   4
  -2   7  -5 1.91361 0.68037   2
  -2   7  -5 3.89769 2.27217   6
  -2   7   5 0.13467 1.97745   4
  -2   7   5 4.25174 2.71786   6
   2  -7   5 1.60189 0.72383   2
  -7  -2   5 2.48677 0.67545   2
   2  -7   5 1.10033 1.19761   1
   2  -7   5 2.18502 1.71532   6
  -7  -2   5 3.15234 2.45172   1
  -7  -2   5 1.85697 0.75575   5
   1  -7  -5 -0.2591 0.51977   1
  -1   7  -5 -0.2586 1.64242   6
  -1   7  -5 -0.9820 1.50512   1
   7   1  -5 0.36222 1.26871   6
   1  -7  -5 -0.5803 0.45282   5
  -1   7  -5 -1.5287 1.34728   4
  -1   7  -5 0.14542 0.50131   2
   1  -7   5 0.59684 0.54466   2
   1  -7   5 1.13950 1.73730   6
  -7  -1   5 1.29989 0.63823   2
   1  -7   5 -0.5084 0.54698   5
  -7  -1   5 0.05475 1.89472   1
  -1   7   5 -1.0155 1.69295   6
   1  -7   5 -0.4162 1.06765   1
  -1   7   5 0.17720 1.86384   4
   0  -7  -5 0.39444 0.69916   1
   0   7  -5 1.49937 1.87045   6
   0   7  -5 -0.3724 0.46299   2
   7   0  -5 0.29237 1.34530   6
   0   7  -5 0.31913 1.60884   4
   0  -7   5 1.38157 0.82073   5
  -7   0   5 -0.5673 0.59397   2
   0   7   5 0.38764 2.01140   6
  -7   0   5 -1.0229 1.66244   1
   0  -7   5 -0.0037 0.51422   2
   0  -7   5 0.55499 1.17754   1
   1   7  -5 0.31533 0.53220   2
  -1  -7  -5 0.06427 0.76551   1
   7  -1  -5 0.52857 1.39663   6
   1   7  -5 0.54061 1.54023   6
   7  -1  -5 -0.2101 0.48392   2
   1   7  -5 0.50523 1.47564   4
  -7   1   5 -0.2299 0.68456   2
  -1  -7   5 -0.3163 0.46006   2
  -1  -7   5 -0.4079 0.59206   5
  -7   1   5 0.08299 2.11726   1
   2   7  -5 1.22228 0.62277   2
   7  -2  -5 2.95816 0.78364   2
   2   7  -5 3.90356 2.07124   6
  -7   2  -5 0.53262 1.98367   1
  -7   2   5 3.28478 2.87512   1
  -2  -7   5 0.98805 0.59077   2
  -7   2   5 1.12290 2.27111   4
   7  -2   5 2.51562 1.67215   6
  -2  -7   5 1.63314 0.77295   5
  -7   2   5 -0.0902 0.75255   2
   7  -3  -5 -0.1713 1.40609   6
   3   7  -5 -0.5570 1.47946   6
  -7   3  -5 0.16755 1.47922   1
   7  -3  -5 -0.3354 0.42633   2
  -7   3   5 -0.3587 1.93605   4
   7  -3   5 1.53340 1.47443   6
  -7   3   5 0.58118 0.77096   2
  -3  -7   5 0.22228 0.54649   5
  -7   3   5 -0.3259 1.85662   1
  -3  -7   5 -0.1692 0.43031   2
   4   7  -5 4.19322 1.80890   6
   7  -4  -5 1.16156 1.45847   6
   7  -4  -5 0.95525 0.57424   2
  -7   4  -5 0.53647 1.58991   1
   7  -4   5 1.33734 1.64165   6
  -4  -7   5 1.07039 0.58075   5
  -7   4   5 0.12161 2.01975   4
  -7   4   5 1.81328 0.90724   2
  -7   4   5 1.72407 2.37395   1
  -7   5  -5 0.38350 1.39435   1
   5   7  -5 -0.6143 1.24660   6
   7  -5  -5 -0.4725 0.39692   2
   7  -5  -5 -1.1958 0.97276   6
   7  -5   5 0.64903 1.24852   6
  -7   5   5 -0.8853 0.52402   2
  -5  -7   5 -0.3177 1.24041   1
  -7   5   5 -0.4243 1.61424   1
  -7   5   5 -1.7446 1.63126   4
  -7   6  -5 -0.3354 1.02647   1
   7  -6  -5 0.28877 0.38595   2
   7  -6  -5 1.04213 1.09756   6
   6   7  -5 0.14121 1.19026   6
  -7   6   5 -0.9017 1.23911   1
   7  -6   5 -0.5005 1.05438   6
  -7   6   5 0.06667 1.46561   4
  -6  -7   5 0.49512 1.26241   1
  -7   6   5 0.37365 0.47685   2
   7   7  -5 -0.2305 0.88036   6
  -7   7  -5 0.34776 0.93369   1
   7  -7  -5 -0.3434 0.27006   2
   7  -7   5 -0.0322 0.92845   6
  -7   7   5 0.34221 0.38400   2
   7  -7   5 -0.2917 0.27788   2
  -7   7   5 -1.3872 1.06281   4
   7  -8  -5 -0.0746 0.21091   2
   8   7  -5 0.04139 0.63502   6
  -7   8  -5 -0.1584 0.72626   1
   7  -8   5 0.25761 0.24997   2
  -7   8   5 0.53322 0.81917   4
   7  -8   5 0.65002 0.71546   6
  -7   8   5 0.57710 0.29114   2
   6  -8  -5 0.16980 0.33510   1
  -6   8  -5 -0.4576 0.72269   1
   8   6  -5 -0.0604 0.84360   6
   6  -8  -5 -0.2716 0.28936   2
  -6   8  -5 -0.0530 0.36985   2
  -6   8   5 0.17151 0.37946   2
   6  -8   5 -0.2937 0.91238   6
  -6   8   5 -0.6894 1.05466   4
  -8  -6   5 1.04858 1.03276   1
   6  -8   5 -0.3594 0.25104   2
  -6   8   5 0.56014 1.62192   6
   5  -8  -5 -0.5442 0.54070   5
   5  -8  -5 0.09317 0.35557   2
   8   5  -5 0.34052 0.95266   6
  -5   8  -5 -0.3848 0.96771   1
  -5   8  -5 -0.0086 0.41342   2
   5  -8  -5 0.28523 0.43848   1
  -5   8   5 1.23749 1.41893   4
  -5   8   5 -1.3077 1.51187   6
   5  -8   5 -0.1299 0.97278   6
  -5   8   5 0.41336 0.46252   2
  -8  -5   5 1.06034 1.30399   1
   5  -8   5 0.14620 0.34006   2
  -4   8  -5 1.00967 1.38389   4
   4  -8  -5 -0.6975 0.34654   2
  -4   8  -5 0.71076 0.48589   2
   8   4  -5 0.22455 0.99107   6
   4  -8  -5 0.15803 0.50605   1
   4  -8  -5 0.63295 0.64869   5
  -4   8  -5 -0.4966 1.16504   1
  -8  -4   5 -0.6691 1.23496   1
   4  -8   5 -0.3228 0.32452   2
  -4   8   5 -0.1166 0.46937   2
   4  -8   5 -0.5351 1.14035   6
  -4   8   5 0.89243 1.65843   4
  -4   8   5 1.05943 2.17558   6
   3  -8  -5 1.09171 0.74164   1
   3  -8  -5 0.98931 0.49815   2
  -3   8  -5 2.61483 1.62304   4
   3  -8  -5 0.62531 0.64833   5
  -3   8  -5 1.81096 1.97692   6
  -3   8  -5 0.79861 0.52056   2
   8   3  -5 3.42292 1.51693   6
  -3   8  -5 0.73635 1.49544   1
  -3   8   5 -1.0893 1.80879   6
   3  -8   5 1.15826 1.38090   6
  -3   8   5 0.22813 1.71064   4
  -8  -3   5 4.80087 2.35056   1
   3  -8   5 1.06379 0.51174   2
   3  -8   5 1.27395 0.97849   1
  -2   8  -5 -0.3125 0.48107   2
  -2   8  -5 -0.9392 1.06892   4
  -2   8  -5 -0.1699 1.41425   1
   8   2  -5 -0.8854 1.16719   6
   2  -8  -5 0.12981 0.58143   1
   2  -8  -5 -0.3760 0.50294   5
  -2   8  -5 -0.6228 1.65311   6
  -8  -2   5 0.21691 0.44008   5
  -2   8   5 -1.6203 1.73204   6
  -8  -2   5 -0.2248 1.68246   1
   2  -8   5 0.47447 0.48748   2
   2  -8   5 0.34227 0.83514   1
  -2   8   5 -0.5976 1.68084   4
   2  -8   5 -0.9611 0.59194   5
  -1   8  -5 1.72220 1.81709   6
  -1   8  -5 1.46479 0.67545   2
   1  -8  -5 1.40989 0.87396   1
   1  -8  -5 1.76003 0.39038   5
  -1   8  -5 4.35813 1.87246   4
   8   1  -5 1.97209 1.52760   6
  -1   8   5 1.30681 2.13210   6
   1  -8   5 2.56241 1.59264   1
   1  -8   5 1.44871 0.79733   5
  -8  -1   5 3.45788 2.50969   1
  -1   8   5 0.96794 1.91417   4
   1  -8   5 1.85415 0.65265   2
   0   8  -5 0.24605 1.51469   6
   0   8  -5 -0.2288 0.46187   2
   8   0  -5 0.28882 1.31742   6
   0  -8  -5 -0.5207 0.52965   1
   0   8  -5 -0.5298 1.27356   4
   0   8   5 1.09493 1.92557   6
  -8   0   5 -0.6988 1.81737   1
   0  -8   5 0.41086 0.66099   5
   0  -8   5 0.01822 0.48404   2
   0  -8   5 0.35009 1.19740   1
   0   8   5 3.09671 2.17083   4
  -8   0   5 -0.0925 0.56121   2
   8  -1  -5 2.09575 1.49549   6
   1   8  -5 2.60611 1.71893   4
  -1  -8  -5 1.24411 0.89875   1
   1   8  -5 1.61367 1.91951   6
   8  -1  -5 2.11334 0.70995   2
   1   8  -5 1.82684 0.66542   2
  -1  -8   5 1.40330 1.45058   1
  -8   1   5 0.80019 0.70191   2
  -1  -8   5 2.42506 0.88395   5
  -1  -8   5 1.28652 0.55549   2
  -8   1   5 2.77534 2.59490   1
   1   8   5 2.02417 2.12132   6
   2   8  -5 0.42976 1.42700   6
  -8   2  -5 -0.4578 1.55265   1
   2   8  -5 -2.6453 1.08934   4
   8  -2  -5 0.31617 0.51085   2
   8  -2  -5 0.42638 1.37434   6
  -2  -8   5 -0.0739 0.40629   2
  -8   2   5 -0.5384 1.73451   1
   8  -2   5 -1.1085 1.26854   6
  -2  -8   5 0.53839 0.58870   5
   8  -3  -5 1.42697 1.30482   6
   3   8  -5 2.35717 1.62482   4
   8  -3  -5 1.22960 0.54318   2
  -8   3  -5 0.29809 1.50177   1
   3   8  -5 3.76433 1.87223   6
  -3  -8   5 1.55306 0.61550   5
  -8   3   5 1.18067 1.94433   1
   8  -3   5 2.35689 1.46627   6
  -8   3   5 1.59140 0.85083   2
  -8   4  -5 -0.8614 1.05658   1
   4   8  -5 -0.7381 1.24068   4
   8  -4  -5 -0.3788 0.36422   2
   4   8  -5 -0.9302 1.10360   6
   8  -4  -5 -0.3980 1.05429   6
  -8   4   5 0.46769 1.54635   1
  -8   4   5 0.24718 0.65534   2
   8  -4   5 -0.2016 1.12985   6
  -8   5  -5 0.05860 1.09523   1
   8  -5  -5 0.59456 0.40455   2
   5   8  -5 0.35812 1.27721   6
   8  -5  -5 0.76214 1.04328   6
  -8   5   5 -0.8379 1.12694   1
  -8   5   5 0.05516 0.50290   2
   8  -5   5 0.62360 0.99385   6
   8  -6  -5 -0.1503 0.28501   2
   6   8  -5 -0.2686 0.92029   6
  -8   6  -5 -0.0834 0.87435   1
   8  -6  -5 -0.2133 1.27374   6
  -8   6   5 -0.8993 0.97035   1
   8  -6   5 -0.6915 0.79731   6
  -8   6   5 -0.4803 0.35926   2
   8  -7  -5 -0.0874 0.20423   2
  -8   7  -5 -0.4115 0.68339   1
   7   8  -5 -0.2443 0.73846   6
   8  -7   5 1.61041 0.77656   6
  -8   7   5 0.03497 0.29114   2
   6  -9  -5 -0.0696 0.18207   2
  -6   9  -5 0.30142 0.25415   2
   9   6  -5 -0.1442 0.59925   6
   6  -9  -5 0.14124 0.29736   1
  -6   9  -5 -0.0882 0.72987   1
  -6   9   5 0.79356 1.20037   6
  -6   9   5 -0.4684 0.73588   4
  -6   9   5 -0.3152 0.24070   2
   6  -9   5 0.31611 0.23798   2
  -9  -6   5 0.54763 0.78974   1
   9   5  -5 0.14904 0.70032   6
   5  -9  -5 0.20839 0.24345   2
  -5   9  -5 0.51861 0.91843   1
   5  -9  -5 -0.1351 0.27932   1
  -5   9  -5 0.18436 0.29130   2
  -5   9   5 -0.7095 0.95298   4
   5  -9   5 0.25743 0.24773   2
  -5   9   5 0.54765 0.36497   2
  -9  -5   5 -0.3783 0.72602   1
  -5   9   5 0.77626 1.35237   6
  -4   9  -5 0.94926 0.44709   2
   9   4  -5 1.99634 1.02931   6
   4  -9  -5 0.40786 0.40030   1
  -4   9  -5 1.01421 1.19234   4
  -4   9   5 0.14866 0.41072   2
   4  -9   5 -0.1319 0.25500   2
  -9  -4   5 0.30923 1.08692   1
  -4   9   5 -0.7115 1.05190   4
  -4   9   5 0.14905 1.44707   6
  -3   9  -5 -0.7110 0.36037   2
   3  -9  -5 0.13673 0.36244   5
  -3   9  -5 -0.4406 1.15801   4
  -3   9  -5 -1.0316 1.63744   6
   9   3  -5 -0.5271 0.78437   6
   3  -9  -5 -0.0523 0.38992   1
   3  -9   5 -0.0464 0.32718   2
  -3   9   5 -1.7606 1.17609   4
   3  -9   5 -0.5753 0.61227   5
   3  -9   5 -0.3873 0.55553   1
  -3   9   5 -0.1445 1.49225   6
  -9  -3   5 0.27867 1.25558   1
  -2   9  -5 -1.4997 1.03289   4
  -2   9  -5 -0.6550 0.35884   2
   9   2  -5 0.58399 1.06308   6
  -2   9  -5 0.96397 1.52478   6
   2  -9  -5 0.05755 0.47038   1
  -2   9   5 -1.4229 1.23350   4
   2  -9   5 -0.0789 0.66015   1
   2  -9   5 0.18707 0.60010   5
   2  -9   5 0.00207 0.34321   2
  -9  -2   5 1.78052 1.65685   1
  -2   9   5 -1.3663 1.50380   6
  -1   9  -5 0.37921 1.18429   4
   9   1  -5 0.79784 1.07920   6
   1  -9  -5 -0.0513 0.48972   1
  -1   9  -5 0.13824 1.43204   6
  -1   9  -5 -1.0216 0.40271   2
  -1   9   5 -1.3694 1.57432   4
  -1   9   5 -0.0632 1.66546   6
   1  -9   5 0.36327 0.62204   5
  -9  -1   5 -1.0697 1.31950   1
   1  -9   5 -0.0815 0.70318   1
   1  -9   5 -0.0761 0.38842   2
   0   9  -5 -0.3628 1.36372   6
   0   9  -5 0.14909 0.47269   2
   0  -9  -5 0.14392 0.52747   1
   9   0  -5 -0.8258 1.01862   6
   0   9  -5 0.32266 1.12067   4
  -9   0   5 -0.1867 1.41498   1
   0   9   5 0.96630 1.89550   6
   0  -9   5 0.04457 0.38201   2
   0  -9   5 -0.4936 0.72761   1
   0  -9   5 -0.1539 0.53656   5
   0   9   5 -1.0013 1.51920   4
  -1  -9  -5 -0.0900 0.53410   1
   1   9  -5 0.20139 0.47315   2
   1   9  -5 -1.0198 1.26971   6
   9  -1  -5 -1.3761 0.83918   6
   1   9  -5 1.67577 1.34573   4
  -1  -9   5 0.07791 0.35413   2
  -1  -9   5 -0.1200 0.81004   1
  -9   1   5 -0.6577 1.35067   1
  -1  -9   5 -0.1977 0.49992   5
   1   9   5 -0.4395 1.41064   6
  -9   2  -5 -0.1308 1.40912   1
   2   9  -5 -0.7643 1.18653   6
   9  -2  -5 0.03800 1.03211   6
   2   9  -5 1.90611 1.43968   4
   9  -2  -5 0.10739 0.39409   2
  -2  -9   5 -0.0918 0.87500   1
   9  -2   5 0.71414 1.00469   6
  -9   2   5 0.24941 1.47568   1
  -2  -9   5 -0.2917 0.41878   5
  -9   2   5 0.45446 0.52362   2
   9  -3  -5 -0.3563 0.33459   2
   9  -3  -5 -0.2168 0.84560   6
  -9   3  -5 1.01562 1.53286   1
   3   9  -5 -0.4196 1.12673   6
   3   9  -5 0.23164 1.26992   4
  -3  -9   5 0.36501 0.89870   1
  -9   3   5 -1.0122 0.95726   1
  -9   3   5 -0.6763 0.47945   2
   9  -3   5 1.52730 1.06215   6
   4   9  -5 0.50540 1.07837   4
   4   9  -5 3.16585 1.51346   6
   9  -4  -5 0.43086 0.34767   2
  -9   4  -5 -0.8238 0.96443   1
   9  -4  -5 0.23491 0.85584   6
  -9   4   5 0.12041 0.46465   2
   9  -4   5 0.36378 0.86027   6
  -4  -9   5 0.64984 0.92980   1
  -9   4   5 0.32319 1.16679   1
   5   9  -5 -1.0346 0.85458   4
   5   9  -5 -0.9318 0.85643   6
   9  -5  -5 -0.2045 0.22842   2
  -9   5  -5 0.06799 0.89193   1
   9  -5  -5 0.56124 0.72017   6
   9  -5   5 -0.0865 0.72734   6
  -5  -9   5 0.58369 0.83735   1
  -9   5   5 0.02709 0.40852   2
  -9   5   5 0.16431 0.96757   1
  -9   6  -5 0.00831 0.76414   1
   6   9  -5 0.16411 0.76322   6
   9  -6  -5 0.00258 0.21227   2
   6   9  -5 1.00839 0.83399   4
  -9   6   5 -0.0001 0.78681   1
  -9   6   5 0.42217 0.32146   2
   9  -6   5 0.10767 0.61190   6
  -6  -9   5 -0.1699 0.58791   1
   5 -10  -5 0.01274 0.23092   1
  -5  10  -5 0.02448 0.23432   2
   5 -10   5 -0.0963 0.15959   2
  -5  10   5 -0.0855 0.63125   4
  -4  10  -5 -0.2893 0.24290   2
  10   4  -5 0.41758 0.60170   6
  -4  10  -5 -0.4648 0.83091   4
   4 -10  -5 -0.1137 0.21430   1
  -4  10   5 -0.1337 0.32165   2
  -4  10   5 -0.1677 0.98200   6
 -10  -4   5 -0.0073 0.74165   1
  -4  10   5 -0.6802 0.79535   4
   4 -10   5 -0.0606 0.19320   2
  10   3  -5 0.38876 0.68612   6
   3 -10  -5 -0.0283 0.25806   1
  -3  10  -5 -0.9219 0.79382   4
  -3  10  -5 -0.0829 0.31348   2
   3 -10   5 0.02444 0.24024   2
  -3  10   5 0.55949 1.28217   6
 -10  -3   5 0.55194 1.05947   1
  -3  10   5 0.86750 1.05481   4
  10   2  -5 -0.3101 0.68393   6
   2 -10  -5 -0.0828 0.29669   1
  -2  10  -5 -0.2533 0.30678   2
  -2  10  -5 0.81882 1.32748   6
  -2  10  -5 -1.5206 0.84309   4
   2 -10   5 0.05069 0.44004   1
   2 -10   5 -0.1722 0.23863   2
 -10  -2   5 -0.0197 0.99339   1
  -2  10   5 0.65115 1.16164   4
  -2  10   5 -0.1499 1.24044   6
  -1  10  -5 0.15452 0.36348   2
  10   1  -5 0.92915 0.92740   6
  -1  10  -5 0.41462 1.02371   4
  -1  10  -5 2.04051 1.30196   6
   1 -10  -5 0.20091 0.40692   1
  -1  10   5 2.46609 1.43372   4
  -1  10   5 -0.6132 1.20349   6
   1 -10   5 0.06980 0.27045   2
   1 -10   5 0.01244 0.46374   1
 -10  -1   5 0.01879 1.07283   1
   0  10  -5 1.03840 0.98618   4
   0 -10  -5 -0.1454 0.38818   1
  10   0  -5 -0.0292 0.74660   6
   0  10  -5 -0.0927 0.40550   2
   0  10  -5 -0.8937 1.06910   6
 -10   0   5 0.21911 1.25113   1
   0  10   5 -1.0801 1.22577   6
   0  10   5 0.41138 1.25949   4
   0 -10   5 -0.1838 0.44112   1
   0 -10   5 -0.2447 0.22706   2
  10  -1  -5 -0.2906 0.78283   6
  -1 -10  -5 0.26669 0.48640   1
   1  10  -5 -0.6415 0.86273   4
   1  10  -5 -0.0967 0.43645   2
   1  10  -5 2.30130 1.35071   6
  -1 -10   5 0.59481 0.71865   1
 -10   1   5 1.15830 1.28574   1
   1  10   5 0.34837 1.34555   6
   2  10  -5 -0.3144 0.87456   6
   2  10  -5 -0.4463 0.84081   4
 -10   2  -5 -0.8107 1.09198   1
  10  -2  -5 -0.3931 0.68478   6
 -10   2   5 -0.0687 1.07647   1
  -2 -10   5 -0.1759 0.61138   1
  10  -2   5 0.23815 0.72390   6
   3  10  -5 1.00162 0.86269   4
 -10   3  -5 0.08949 0.88968   1
  10  -3  -5 0.61008 0.73162   6
   3  10  -5 -0.0281 0.83595   6
  10  -3  -5 0.26649 0.26615   2
  10  -3   5 -0.1243 0.66075   6
  -3 -10   5 0.02633 0.62338   1
 -10   3   5 0.27320 0.99950   1
  10  -4  -5 0.13786 0.57828   6
   4  10  -5 0.17390 0.82162   6
 -10   4  -5 0.53459 0.87030   1
  10  -4  -5 -0.2928 0.21960   2
   4  10  -5 0.07442 0.76282   4
 -10   4   5 0.66493 0.89547   1
  10  -4   5 -0.0112 0.58055   6
  -4 -10   5 -0.2574 0.50806   1
   5  10  -5 -0.7963 0.59732   6
 -10   5  -5 0.23050 0.67133   1
 -10   5   5 -0.0887 0.62951   1
  10  -5   5 0.05698 0.49768   6
  -5 -10   5 0.07726 0.49631   1
   3 -11  -5 0.00947 0.26458   1
  11   2  -5 -0.2981 0.46883   6
  -2  11  -5 -0.2212 0.23792   2
  -2  11  -5 0.83385 0.71512   4
   2 -11  -5 0.25954 0.26056   1
 -11  -2   5 -0.3531 0.73958   1
  -2  11   5 -0.3341 0.82567   6
  -2  11   5 0.07023 0.84712   4
   1 -11  -5 0.01796 0.25221   1
  -1  11  -5 0.38322 0.73415   4
  11   1  -5 0.20197 0.54395   6
  -1  11  -5 0.13232 0.28138   2
  -1  11  -5 0.06090 0.96561   6
  -1  11   5 0.29163 1.00265   6
  -1  11   5 -0.4855 0.96961   4
   1 -11   5 -0.1481 0.31395   1
 -11  -1   5 0.49903 0.87993   1
   0  11  -5 0.58665 0.83554   6
   0 -11  -5 0.04592 0.29557   1
  11   0  -5 -0.3831 0.54994   6
   0  11  -5 -0.2792 0.70636   4
   0  11  -5 0.00002 0.41784   2
   0 -11   5 -0.0825 0.33257   1
 -11   0   5 -0.5267 0.76432   1
   0  11   5 0.14412 0.95124   6
  11  -1  -5 0.06774 0.56103   6
   1  11  -5 0.54248 0.70830   4
   1  11  -5 0.36271 0.82131   6
  -1 -11  -5 -0.0453 0.28947   1
  -1 -11   5 -0.2972 0.30911   1
   1  11   5 -0.4224 1.29278   6
 -11   1   5 0.10375 0.85736   1
   2  11  -5 1.22807 0.72995   4
   2  11  -5 -0.1659 0.67814   6
  11  -2  -5 -0.0318 0.55291   6
  -2 -11   5 0.03855 0.39644   1
 -11   2   5 0.15168 0.75903   1
   0   0  -6 1570.27 135.470   5
   0  -1  -6 -0.5521 0.52946   5
   1   0  -6 -2.0306 0.54711   5
   0   1  -6 -1.7633 0.46355   5
  -1   0  -6 -0.9457 0.42908   5
   1  -1  -6 372.135 37.2255   3
   1  -1  -6 410.101 37.5326   5
  -1  -1  -6 481.309 37.2075   5
  -1   1  -6 436.968 37.3712   5
   1   1  -6 447.942 37.5564   5
  -1   2  -6 29.1853 2.77455   5
   1  -2  -6 24.4348 3.04504   5
   1  -2  -6 21.8695 2.57528   3
   2   1  -6 30.1864 3.03775   5
   0   2  -6 12.9360 1.67962   5
   2   0  -6 6.28510 1.40109   3
   2   0  -6 12.6985 2.01686   5
   0  -2  -6 12.5124 1.56075   5
   1   2  -6 31.6592 3.07889   5
   2  -1  -6 30.2012 3.54474   5
   2  -1  -6 24.8315 2.88649   3
   2  -2  -6 19.6476 2.85118   5
   2   2  -6 27.2734 2.87054   5
   2  -2  -6 16.6431 2.29793   3
   2  -3  -6 9.26946 1.81502   5
   2  -3  -6 8.92055 1.40643   3
   1  -3  -6 121.940 11.0924   5
  -1   3  -6 127.794 10.9876   5
   1  -3  -6 117.758 10.7913   3
   0  -3  -6 -0.7904 0.33594   3
   3   0  -6 -1.2250 0.87490   5
   0   3  -6 -0.8685 0.60816   5
   0  -3  -6 -1.4860 0.46468   5
   1   3  -6 138.550 11.4063   5
   3  -1  -6 111.865 11.5630   5
  -1  -3   6 125.458 11.6603   5
   3  -2  -6 9.04451 1.88128   5
  -2  -3   6 11.3023 1.91917   5
   3  -3  -6 82.8524 9.05599   5
   3  -3  -6 98.0953 8.90979   2
  -3  -3   6 94.1633 8.91205   2
  -3  -3   6 111.598 9.21333   5
   4   3  -6 9.63303 1.44419   2
   3  -4  -6 8.59850 1.34572   2
  -3   4  -6 8.44995 1.47053   2
   3  -4  -6 7.67326 1.69060   5
   4   3  -6 30.3457 4.36701   6
   3  -4  -6 9.21919 2.09694   1
  -3   4  -6 2.17212 2.28771   1
  -4  -3   6 6.68627 1.96353   4
   3  -4   6 7.36346 1.85859   4
  -3   4   6 8.30138 4.37547   6
  -3   4   6 4.76326 3.05901   4
  -4  -3   6 5.51091 1.29177   2
  -3   4   6 10.5603 1.70759   2
  -4  -3   6 9.75629 1.76603   5
   3  -4   6 11.5375 2.99149   6
   2  -4  -6 2.71132 0.82135   2
  -2   4  -6 3.58780 0.92064   2
  -2   4  -6 0.10189 2.09159   1
   2  -4  -6 2.93407 1.05754   5
   4   2  -6 7.93718 2.65620   6
  -4  -2   6 3.15743 1.03781   2
   2  -4   6 3.58917 2.11668   6
   2  -4   6 3.74502 1.52055   4
  -4  -2   6 12.8882 4.13278   1
  -2   4   6 0.37722 3.56003   6
   1  -4  -6 17.0850 1.82934   3
  -1   4  -6 20.1224 2.26035   5
   1  -4  -6 16.4822 2.24917   5
   0  -4  -6 599.887 53.2672   3
   0  -4  -6 648.653 53.5277   5
   0   4  -6 611.434 53.7017   5
   4  -1  -6 15.8494 2.84912   5
  -1  -4   6 19.5884 2.67660   5
   2   4  -6 7.67805 2.68817   6
   4  -2  -6 4.20359 1.03234   2
   4  -2  -6 4.12442 1.29944   5
  -2  -4   6 2.63457 1.04753   5
  -4   2   6 0.57722 2.73079   4
  -4   2   6 4.55799 1.31889   2
  -4   2   6 2.34324 3.96987   6
  -2  -4   6 14.3605 4.13411   1
  -2  -4   6 2.13343 0.91170   2
   3   4  -6 32.6378 4.61565   6
   4  -3  -6 5.74914 1.59931   1
   4  -3  -6 10.6232 1.51848   2
   4  -3  -6 8.48318 1.82307   5
  -4   3  -6 7.68589 1.37903   2
   3   4  -6 10.9053 1.47319   2
   4  -3  -6 7.17268 2.27650   6
  -4   3   6 18.9608 5.13133   1
   4  -3   6 6.75818 2.39718   6
  -4   3   6 10.4060 4.33353   6
   4  -3   6 7.95397 2.03248   4
  -3  -4   6 10.1008 1.68521   5
  -4   3   6 7.60400 3.40850   4
  -3  -4   6 7.24218 1.40635   2
  -3  -4   6 9.74433 1.93034   4
  -4   3   6 9.18463 1.66085   2
   4  -4  -6 28.8909 3.58746   1
   4  -4  -6 24.3134 3.56384   5
  -4   4  -6 25.8886 3.04767   2
   4  -4  -6 25.9108 3.08824   2
   4  -4   6 24.2010 4.47870   6
  -4   4   6 19.7805 4.79390   4
  -4   4   6 29.0709 3.46030   2
   4  -4   6 26.8551 4.60921   6
  -4  -4   6 30.0198 2.94983   2
   4  -4   6 24.7599 3.64339   4
  -4   4   6 55.0646 8.22781   1
  -4   4   6 32.7979 6.96635   6
  -4  -4   6 27.4867 3.35347   5
  -4   5  -6 0.70125 1.64280   1
   4  -5  -6 4.83460 1.43796   1
   5   4  -6 22.7337 3.74675   6
   4  -5  -6 7.60559 1.60994   5
   4  -5  -6 6.50371 1.16892   2
  -4   5  -6 5.67403 1.10029   2
  -5  -4   6 7.74439 1.13486   2
  -5  -4   6 6.44865 1.26972   5
   4  -5   6 5.31979 2.18263   6
  -4   5   6 7.25360 1.38233   2
  -4   5   6 9.91103 4.17908   6
  -5  -4   6 26.0608 5.32357   1
   4  -5   6 6.35074 1.16908   2
   4  -5   6 8.70193 1.92214   4
  -4   5   6 7.25032 3.11196   4
   3  -5  -6 38.8566 4.09236   2
  -3   5  -6 44.6036 4.22075   2
   3  -5  -6 39.6695 4.77128   5
   3  -5  -6 40.2521 4.87415   1
  -3   5  -6 47.1072 5.75840   4
   3  -5   6 50.1967 6.63400   6
  -3   5   6 34.9607 6.22838   4
  -5  -3   6 52.3623 4.51743   5
  -5  -3   6 45.6108 4.17956   2
   3  -5   6 39.2480 4.15423   2
  -3   5   6 40.1158 7.90360   6
   3  -5   6 38.3642 4.94653   4
  -3   5   6 43.1040 4.34569   2
   3  -5   6 50.0255 6.59451   6
  -2   5  -6 24.9411 4.46843   6
   5   2  -6 11.1044 1.59772   2
   2  -5  -6 12.8720 1.95153   5
   2  -5  -6 11.4832 2.38580   1
   5   2  -6 28.2247 4.08937   6
  -2   5  -6 3.43463 2.45839   1
  -2   5  -6 17.7439 3.39804   4
   2  -5  -6 12.0514 1.55572   2
  -2   5  -6 12.3498 1.67501   2
   2  -5   6 9.21162 2.73256   6
  -5  -2   6 14.3706 2.49038   4
  -5  -2   6 9.76706 1.60508   2
  -2   5   6 13.1339 4.21696   6
   2  -5   6 12.3884 1.72627   2
  -2   5   6 16.0084 3.85001   4
   2  -5   6 11.4760 2.18980   4
   2  -5   6 9.43231 2.99222   1
   1  -5  -6 177.320 16.7224   1
  -1   5  -6 198.419 15.8384   2
   1  -5  -6 179.333 15.8718   5
   1  -5  -6 176.973 15.5869   3
   1  -5  -6 168.463 15.5812   2
   5   1  -6 175.258 15.7625   2
  -1   5   6 194.118 18.6480   6
   1  -5   6 203.603 17.4853   6
  -1   5   6 181.035 17.6705   4
  -5  -1   6 138.690 15.7735   2
   1  -5   6 203.322 16.4573   4
  -5  -1   6 179.347 16.6145   4
   1  -5   6 186.328 15.8716   2
   5   0  -6 0.67113 0.61356   2
   0  -5  -6 0.21996 0.34929   5
   5   0  -6 0.46283 1.66093   6
   0   5  -6 -0.3521 0.48554   2
   0   5  -6 -0.4098 1.81239   6
   0  -5  -6 0.28037 0.22377   3
   0   5  -6 0.09758 1.82059   1
   0  -5   6 -0.0584 0.73430   5
   0  -5   6 -0.3450 0.53234   2
  -5   0   6 0.37059 0.70280   2
  -5   0   6 -0.6173 4.78227   6
   0  -5   6 1.10337 1.87599   6
  -5   0   6 1.26023 1.91531   4
  -5   0   6 -0.2366 2.11471   1
   0  -5   6 0.60980 1.13267   4
   5  -1  -6 186.872 17.0055   2
   1   5  -6 208.581 17.0430   2
   5  -1  -6 200.499 17.9272   1
  -5   1   6 180.750 17.1395   2
  -5   1   6 168.852 18.1737   4
  -1  -5   6 206.803 18.5144   6
  -5   1   6 177.941 19.6143   6
  -1  -5   6 198.320 17.5467   4
  -1  -5   6 197.409 17.0762   2
  -1  -5   6 187.802 17.3538   5
   5  -2  -6 12.1519 2.37660   1
   2   5  -6 10.8928 1.71867   2
   2   5  -6 34.0541 4.79097   6
   5  -2  -6 13.1751 2.84415   6
   5  -2  -6 12.6721 1.80964   2
  -5   2   6 34.4789 6.78726   1
  -2  -5   6 14.7850 2.44487   4
  -5   2   6 11.6670 1.98740   2
  -5   2   6 7.74286 3.34038   4
  -5   2   6 7.34475 4.21727   6
  -2  -5   6 14.3964 2.08909   5
  -2  -5   6 21.8717 4.75217   1
  -2  -5   6 11.8143 1.82959   2
   5  -2   6 12.6444 3.11798   6
   5  -2   6 12.1661 3.04239   6
   3   5  -6 46.4718 4.14358   2
   5  -3  -6 39.6068 4.68634   1
   5  -3  -6 44.0432 4.19528   2
  -5   3   6 43.7878 6.55504   4
  -3  -5   6 39.6912 4.37119   5
  -5   3   6 42.9315 7.94120   6
   5  -3   6 44.1018 6.11176   6
  -5   3   6 44.7912 4.35824   2
   5  -3   6 39.9180 4.95283   4
  -3  -5   6 42.9725 4.18392   2
  -5   4  -6 0.67479 1.55914   1
  -5   4  -6 5.22289 1.06707   2
   5  -4  -6 3.37519 1.77447   6
   5  -4  -6 4.62207 1.09619   2
   5  -4  -6 7.03337 1.72445   5
   5  -4  -6 7.03138 1.65956   1
   4   5  -6 23.9379 3.69377   6
  -4  -5   6 22.1333 4.68617   1
  -5   4   6 10.0912 4.36047   6
  -4  -5   6 6.98988 1.16829   2
  -5   4   6 10.7183 3.08074   4
   5  -4   6 6.68545 2.56798   6
  -4  -5   6 6.37422 1.30458   5
  -5   4   6 19.5002 5.33189   1
  -5   4   6 7.66574 1.39811   2
   5  -5  -6 119.564 9.72791   2
   5  -5  -6 111.302 10.3818   1
   5  -5  -6 95.3880 10.0411   5
  -5   5  -6 107.350 9.66087   2
  -5  -5   6 111.947 9.57586   2
  -5   5   6 90.3257 11.5941   4
  -5  -5   6 108.877 9.77851   5
   5  -5   6 103.145 10.9801   6
  -5   5   6 104.012 12.6016   6
  -5   5   6 100.820 9.78594   2
   5  -6  -6 0.14027 0.53991   2
  -5   6  -6 -0.0701 0.55463   2
   5  -6  -6 -0.0058 0.46584   1
  -5   6  -6 -0.2996 1.09816   1
   5  -6  -6 0.03891 0.79783   5
   6   5  -6 1.02466 1.48773   6
  -6  -5   6 0.34184 0.48479   5
   5  -6   6 -0.0589 1.48197   6
  -5   6   6 2.59661 2.10956   4
  -6  -5   6 -0.2100 1.59240   1
   5  -6   6 -0.2112 0.52077   2
  -5   6   6 0.09273 0.63622   2
  -5   6   6 -0.7403 2.52327   6
  -4   6  -6 123.096 13.5429   4
   4  -6  -6 136.861 12.9280   5
   4  -6  -6 147.091 12.5644   2
  -4   6  -6 148.546 12.6325   2
   4  -6  -6 147.186 13.3982   1
   4  -6   6 138.298 13.9094   6
  -6  -4   6 161.507 12.7412   5
   4  -6   6 130.499 12.5810   2
  -4   6   6 126.281 14.0379   4
  -4   6   6 116.608 15.0227   6
  -4   6   6 145.139 12.7127   2
  -6  -4   6 142.400 12.4676   2
  -3   6  -6 -0.0700 1.39665   1
   3  -6  -6 1.02175 0.60511   2
   3  -6  -6 2.10202 0.87107   5
   3  -6  -6 1.08728 0.86943   1
  -3   6  -6 2.51439 1.72328   4
  -3   6  -6 1.58097 0.78406   2
   6   3  -6 2.53135 1.69230   6
  -6  -3   6 1.14405 0.64014   2
  -3   6   6 -0.7802 1.97312   4
  -6  -3   6 6.65691 3.18767   1
  -6  -3   6 0.91039 0.71977   5
   3  -6   6 1.65201 1.21728   4
   3  -6   6 0.05115 0.50328   2
  -3   6   6 -0.3127 2.49717   6
   3  -6   6 0.27661 1.46934   6
  -2   6  -6 23.3527 2.80713   2
   2  -6  -6 18.4080 2.80206   5
  -2   6  -6 37.2226 5.44353   6
  -2   6  -6 36.8540 4.57289   4
   2  -6  -6 26.4225 2.53822   2
   2  -6  -6 24.0203 3.34484   1
  -2   6   6 24.5587 5.66281   6
  -2   6   6 23.4306 4.73211   4
  -6  -2   6 21.1068 2.70901   2
   2  -6   6 28.2387 4.61953   6
   2  -6   6 33.2504 5.45570   1
   2  -6   6 27.0806 2.70547   2
   2  -6   6 26.1195 3.40516   4
  -1   6  -6 -0.7533 1.60493   1
   1  -6  -6 1.81078 0.64849   5
   6   1  -6 1.69401 0.67701   2
   1  -6  -6 2.11132 0.50909   3
  -1   6  -6 5.13385 2.30464   6
  -1   6  -6 3.77268 0.87426   2
   6   1  -6 5.56439 2.14290   6
   1  -6  -6 3.28164 1.29477   1
  -1   6  -6 6.33356 2.25678   4
  -6  -1   6 2.63353 0.86761   2
   1  -6   6 2.60227 0.79198   2
   1  -6   6 0.97972 1.57167   1
   1  -6   6 2.72899 1.96540   6
   1  -6   6 4.05839 2.21942   6
   1  -6   6 1.86108 1.25946   4
  -6  -1   6 13.3445 4.15514   1
  -1   6   6 1.76469 2.65237   4
  -1   6   6 0.98274 2.61600   6
   0  -6  -6 16.7779 3.03951   1
   6   0  -6 14.1138 2.09071   2
   0   6  -6 14.5548 2.05031   2
   0   6  -6 41.8003 5.20174   6
   0   6  -6 41.9463 4.69269   4
   0   6   6 19.7003 4.67105   6
   0  -6   6 21.1869 2.93901   4
   0  -6   6 16.4814 3.54048   6
   0  -6   6 16.7274 3.58512   6
  -6   0   6 14.2893 2.94752   4
   0  -6   6 14.8165 2.39447   5
   0  -6   6 15.6848 2.17156   2
   1   6  -6 4.64673 0.93185   2
   6  -1  -6 1.86295 0.76353   2
   1   6  -6 10.2958 2.84315   6
   6  -1  -6 0.39356 1.40054   6
  -6   1   6 0.80094 1.96588   4
  -6   1   6 2.27996 0.96368   2
  -1  -6   6 3.44831 0.90071   2
  -6   1   6 9.58972 3.86530   1
  -1  -6   6 -0.9617 1.01415   4
  -1  -6   6 2.46576 1.01526   5
   2   6  -6 27.7534 2.83393   2
   6  -2  -6 26.8436 3.48575   1
   6  -2  -6 29.3326 2.88305   2
  -6   2   6 22.5596 4.55783   4
  -6   2   6 37.4059 6.81486   6
  -6   2   6 35.5956 3.57146   2
  -2  -6   6 23.1028 3.35371   4
   6  -2   6 28.3234 4.71411   6
  -2  -6   6 27.2343 2.87207   2
  -2  -6   6 21.2410 3.16158   5
  -6   3  -6 0.35206 1.53663   1
   3   6  -6 3.39522 2.04121   6
   3   6  -6 1.79449 0.71332   2
   6  -3  -6 1.04442 0.66208   2
   6  -3  -6 1.39978 0.84698   1
   6  -3  -6 -0.3210 1.41239   6
  -3  -6   6 1.43268 0.67120   2
  -6   3   6 2.36477 3.33707   6
  -6   3   6 3.11847 2.85632   1
   6  -3   6 1.40382 1.72620   6
  -6   3   6 0.45457 0.78971   2
  -6   3   6 2.72619 2.28755   4
  -3  -6   6 1.70385 1.89613   1
  -3  -6   6 1.91170 0.81871   5
   6  -4  -6 148.141 13.0640   2
   6  -4  -6 151.933 13.7226   1
  -4  -6   6 135.272 13.1502   5
  -4  -6   6 147.689 12.9373   2
   6  -4   6 138.015 14.2439   6
  -6   4   6 168.861 13.2792   2
  -6   4   6 127.229 15.7465   6
  -6   4   6 144.562 14.6555   4
   6  -5  -6 0.34296 0.52287   1
  -6   5  -6 -0.0449 0.50426   2
   6  -5  -6 0.23375 0.50426   2
   6  -5  -6 -1.0294 0.89663   5
   5   6  -6 -0.0719 1.36854   6
  -6   5  -6 -0.6373 1.21995   1
   6  -5  -6 1.46963 1.41999   6
  -6   5   6 0.06800 1.97648   1
  -5  -6   6 0.71987 0.55850   5
  -5  -6   6 0.93518 1.76057   1
  -6   5   6 0.57535 0.71408   2
  -6   5   6 -0.3115 2.06400   4
  -6   5   6 -0.1482 2.81618   6
   6  -5   6 -0.3373 1.32601   6
   6  -6  -6 5.00441 0.88851   2
  -6   6  -6 4.73804 0.83616   2
   6   6  -6 12.4690 2.54518   6
   6  -6  -6 4.59094 1.22580   1
  -6   6  -6 0.00812 1.29259   1
   6  -6  -6 2.99608 1.03537   5
  -6   6   6 5.77847 2.17620   4
   6  -6   6 3.92390 0.85007   2
  -6  -6   6 14.2048 3.47110   1
  -6   6   6 5.49111 3.05511   6
   6  -6   6 3.29369 1.65364   6
  -6   6   6 4.17707 0.95764   2
  -6   7  -6 0.40643 1.01094   1
  -6   7  -6 -0.3627 0.40717   2
   7   6  -6 -0.2831 0.95131   6
   6  -7  -6 0.13132 0.39773   1
   6  -7  -6 0.00038 0.35993   2
   6  -7  -6 0.69461 0.63939   5
   6  -7   6 -0.2918 0.33904   2
  -6   7   6 -0.2689 1.97724   6
  -7  -6   6 0.26157 1.14729   1
   6  -7   6 0.26770 1.12888   6
  -6   7   6 -0.0630 0.44189   2
  -6   7   6 -0.0840 1.41370   4
   5  -7  -6 9.70994 1.86694   1
  -5   7  -6 10.9250 1.45732   2
   5  -7  -6 13.8162 1.47283   2
   5  -7  -6 9.22523 1.64324   5
  -5   7   6 8.27267 3.19494   6
   5  -7   6 8.62082 2.26795   6
   5  -7   6 9.71139 1.42962   2
  -5   7   6 6.45436 2.38416   4
  -5   7   6 12.1885 1.58391   2
  -4   7  -6 1.32557 0.61570   2
   4  -7  -6 1.58237 0.80051   5
   4  -7  -6 1.64407 0.60152   2
  -4   7  -6 2.60332 1.77049   4
  -4   7  -6 -0.1313 1.18829   1
   4  -7  -6 1.67974 0.82751   1
   7   4  -6 1.78748 1.42397   6
   4  -7   6 1.12095 0.60742   2
  -4   7   6 -1.1629 2.28691   6
  -4   7   6 0.55937 2.00085   4
  -4   7   6 1.38530 0.74758   2
  -7  -4   6 1.50569 0.56482   5
   4  -7   6 1.17927 1.53762   6
  -7  -4   6 6.29231 2.64837   1
   3  -7  -6 48.8790 4.49119   2
  -3   7  -6 46.5588 4.64697   2
   3  -7  -6 39.5679 4.69688   5
  -3   7  -6 55.1447 6.30684   4
   3  -7  -6 46.0106 5.24891   1
   3  -7   6 39.5892 5.91779   6
   3  -7   6 50.9952 4.66148   2
  -7  -3   6 57.1770 4.73915   5
   3  -7   6 56.2156 6.47449   1
  -3   7   6 48.4958 7.99026   6
  -3   7   6 53.1031 7.11552   4
  -2   7  -6 8.72538 2.77454   6
   7   2  -6 10.3451 2.49122   6
   2  -7  -6 5.28102 0.99916   5
  -2   7  -6 3.89471 0.90448   2
  -2   7  -6 3.51231 1.79817   4
  -2   7  -6 1.45566 1.84941   1
   2  -7  -6 3.40603 1.31867   1
   2  -7  -6 5.35551 0.80505   2
   2  -7   6 3.35997 0.89563   2
  -7  -2   6 4.02405 0.92687   2
  -2   7   6 0.14002 2.11091   4
  -2   7   6 4.24105 2.73577   6
   2  -7   6 3.94704 1.77311   1
   2  -7   6 4.44224 2.09338   6
  -1   7  -6 2.06114 0.70421   2
  -1   7  -6 7.30889 2.67405   6
  -1   7  -6 1.17420 1.54991   4
   1  -7  -6 2.22126 1.06197   1
  -1   7  -6 0.53504 1.71455   1
   1  -7  -6 1.60291 0.50082   5
   7   1  -6 2.45400 1.69134   6
   1  -7   6 1.63949 0.65652   2
  -1   7   6 -2.0483 2.10431   4
   1  -7   6 1.00354 1.15765   4
  -7  -1   6 6.03622 3.24364   1
   1  -7   6 0.05565 0.78192   5
   1  -7   6 0.22806 1.16882   1
   1  -7   6 3.32122 1.84605   6
  -7  -1   6 0.12918 0.55532   2
  -1   7   6 1.40670 2.42360   6
   0   7  -6 -0.6117 1.69846   6
   0  -7  -6 -0.2579 0.61608   1
   7   0  -6 -0.2806 0.50685   2
   0   7  -6 0.06169 0.45991   2
   7   0  -6 1.41041 1.48161   6
   0   7  -6 0.83908 1.61511   4
  -7   0   6 -1.3093 1.56060   1
   0  -7   6 0.57923 0.72785   5
   0   7   6 0.41570 2.21549   6
  -7   0   6 -0.4273 0.56287   2
   0  -7   6 0.09713 0.56283   2
   0  -7   6 -1.0274 0.96552   4
   0  -7   6 -0.7494 1.13863   1
   7  -1  -6 0.83304 0.61540   2
   7  -1  -6 0.78068 1.51267   6
   1   7  -6 11.5158 2.56010   4
   1   7  -6 5.99101 2.42897   6
   1   7  -6 1.21690 0.60675   2
  -7   1   6 5.26305 3.07217   1
  -1  -7   6 2.70876 1.28623   4
  -1  -7   6 1.44672 0.89604   5
  -7   1   6 0.76541 0.79043   2
  -1  -7   6 1.76259 0.72443   2
   7  -2  -6 1.04759 1.58558   6
   2   7  -6 10.9602 2.79913   6
   7  -2  -6 3.96689 0.89562   2
   2   7  -6 5.74017 1.12677   2
  -7   2  -6 0.29403 1.79492   1
  -7   2   6 16.9539 4.77551   1
  -7   2   6 8.46185 2.70370   4
   7  -2   6 5.02498 2.04915   6
  -2  -7   6 5.07747 0.96216   2
  -2  -7   6 5.36978 1.18830   5
  -7   2   6 5.10903 1.19594   2
   7  -3  -6 45.4758 4.37934   2
  -3  -7   6 47.8442 4.31667   2
  -3  -7   6 39.9298 4.49319   5
  -7   3   6 50.0871 6.21292   4
  -7   3   6 49.5721 4.61926   2
   7  -3   6 46.3613 5.63366   6
   7  -4  -6 1.01224 1.31011   6
   7  -4  -6 3.12359 0.74838   2
  -7   4  -6 1.41835 1.52041   1
   4   7  -6 5.12648 2.03485   6
  -4  -7   6 1.81952 0.69804   5
   7  -4   6 1.77295 1.48982   6
  -7   4   6 1.26819 1.85287   4
  -7   4   6 5.75561 2.98235   1
  -4  -7   6 1.06027 0.49332   2
  -7   4   6 1.79034 0.81843   2
   7  -5  -6 10.9345 1.35576   2
  -7   5   6 15.3935 1.79948   2
  -5  -7   6 8.15263 1.11908   5
  -7   5   6 6.84886 2.42866   4
   7  -5   6 11.3641 2.63940   6
   7  -6  -6 0.00679 0.44143   1
   6   7  -6 -0.7808 0.97176   6
  -7   6  -6 -0.8226 0.85608   1
   7  -6  -6 -0.2135 0.33499   2
  -7   6   6 0.06037 0.52600   2
  -7   6   6 3.49238 1.53493   4
   7  -6   6 -0.2671 1.05528   6
   7  -7  -6 1.38581 0.42116   2
   7   7  -6 2.92805 1.20751   6
  -7   7  -6 -0.4228 0.86787   1
  -7   7   6 1.30057 0.48055   2
  -7   7   6 0.38567 1.07279   4
   7  -7   6 2.07474 1.10690   6
   7  -7   6 2.32702 0.51185   2
   8   7  -6 1.46612 0.83404   6
   7  -8  -6 0.31803 0.22847   2
  -7   8  -6 -0.7083 0.53592   1
  -7   8   6 1.04349 0.32881   2
   7  -8   6 0.57649 0.70336   6
   7  -8   6 0.45450 0.25380   2
  -7   8   6 1.03579 0.79453   4
   6  -8  -6 6.58018 0.77930   2
  -6   8  -6 5.53578 0.77990   2
   6  -8  -6 7.25875 1.21113   1
  -6   8  -6 1.83020 1.35381   1
   6  -8   6 7.25456 0.88882   2
  -6   8   6 2.76885 1.37128   4
  -6   8   6 6.28021 0.88444   2
  -8  -6   6 14.7944 2.72860   1
   6  -8   6 5.17272 1.44072   6
  -6   8   6 6.19948 2.07862   6
   5  -8  -6 2.35204 0.67502   5
   8   5  -6 4.08874 1.40892   6
  -5   8  -6 0.71862 1.17718   1
  -5   8  -6 0.35810 0.43257   2
   5  -8  -6 0.71871 0.37107   2
   5  -8  -6 1.06054 0.56160   1
  -5   8   6 1.42498 1.74449   6
  -5   8   6 1.29360 0.52462   2
   5  -8   6 -0.5331 0.97161   6
   5  -8   6 1.21422 0.44450   2
  -5   8   6 3.80921 1.65771   4
  -8  -5   6 3.01599 1.59320   1
   4  -8  -6 0.79231 0.56216   5
  -4   8  -6 0.29266 1.34184   4
   4  -8  -6 2.00679 0.48549   2
   4  -8  -6 0.94413 0.60473   1
  -4   8  -6 0.15008 1.28845   1
   8   4  -6 2.96438 1.35197   6
  -4   8  -6 1.81357 0.56109   2
   4  -8   6 1.12933 1.25863   6
   4  -8   6 0.97877 0.45032   2
  -8  -4   6 5.87401 2.39457   1
  -4   8   6 0.97649 1.90690   6
  -4   8   6 1.56755 1.69711   4
  -4   8   6 1.74228 0.73790   2
  -3   8  -6 1.01392 1.52613   4
   3  -8  -6 2.93929 1.05147   1
  -3   8  -6 4.94104 0.92167   2
  -3   8  -6 -0.1192 1.26115   1
   8   3  -6 11.9415 2.36535   6
   3  -8  -6 4.17949 0.83340   5
   3  -8   6 3.12322 1.65644   6
  -8  -3   6 17.9873 4.03540   1
   3  -8   6 2.89810 1.44059   1
   3  -8   6 2.47777 0.69906   2
  -3   8   6 3.14044 2.13697   4
  -3   8   6 1.39218 2.39675   6
   2  -8  -6 1.14338 0.46698   5
  -2   8  -6 0.66412 0.56184   2
  -2   8  -6 -0.9245 1.26534   1
   2  -8  -6 1.19277 0.76980   1
   8   2  -6 3.73985 1.73661   6
  -2   8  -6 1.02576 1.82881   6
  -2   8  -6 0.96014 1.34094   4
   2  -8   6 1.10058 0.54382   2
   2  -8   6 1.50179 1.49309   6
  -8  -2   6 1.91054 0.66425   5
  -8  -2   6 8.31588 3.11540   1
   2  -8   6 1.13609 1.00656   1
  -2   8   6 1.59675 2.17178   6
  -2   8   6 1.59041 2.08392   4
   1  -8  -6 4.64829 1.40561   1
  -1   8  -6 6.21512 1.95151   4
  -1   8  -6 4.01706 0.93448   2
   8   1  -6 9.89216 2.32235   6
  -1   8  -6 6.14028 2.38823   6
  -8  -1   6 3.70617 0.87876   2
   1  -8   6 6.52762 1.06797   2
   1  -8   6 6.10033 2.18588   1
  -1   8   6 6.17204 2.89899   6
  -1   8   6 2.35916 2.21777   4
   1  -8   6 3.36971 1.05321   5
   0   8  -6 5.40028 2.37743   6
   0   8  -6 6.95939 2.16605   4
   0  -8  -6 4.82522 1.44733   1
   8   0  -6 6.14364 2.04927   6
   0   8  -6 1.96792 0.74635   2
   0  -8   6 2.85110 0.78325   2
   0  -8   6 4.08784 1.93992   1
  -8   0   6 7.10909 1.06817   2
   0   8   6 6.20378 2.89249   6
  -8   0   6 13.6066 4.17944   1
   0  -8   6 3.84720 1.11560   5
   1   8  -6 2.68049 0.78191   2
   8  -1  -6 4.74601 0.91449   2
   1   8  -6 10.0408 2.76445   6
  -1  -8  -6 3.93794 1.27682   1
   1   8  -6 7.11542 2.14511   4
   8  -1  -6 10.1708 2.30624   6
  -1  -8   6 3.26787 1.78430   1
  -8   1   6 22.7109 5.21704   1
  -1  -8   6 2.36172 0.94358   5
  -1  -8   6 2.91956 0.74290   2
   1   8   6 7.00254 2.66708   6
  -8   1   6 1.03107 0.75424   2
   2   8  -6 0.78822 0.58369   2
  -8   2  -6 0.00826 1.69104   1
   8  -2  -6 1.68863 1.45489   6
   8  -2  -6 0.64806 0.53935   2
   2   8  -6 1.31984 1.70050   6
   2   8  -6 4.50083 1.92936   4
  -2  -8   6 1.00183 0.70735   5
   8  -2   6 0.46897 1.35939   6
  -2  -8   6 1.58846 0.56034   2
  -8   2   6 1.88408 0.77979   2
  -8   2   6 3.41386 2.58984   1
  -8   3  -6 0.55856 1.44070   1
   8  -3  -6 1.42132 1.21802   6
   3   8  -6 12.0118 2.67275   6
   8  -3  -6 3.19219 0.71825   2
   3   8  -6 8.86868 2.03458   4
  -8   3   6 3.27900 0.92716   2
  -3  -8   6 3.07984 0.61278   2
   8  -3   6 5.38589 1.81084   6
  -3  -8   6 2.26634 0.72799   5
  -8   3   6 10.2338 3.45583   1
   4   8  -6 3.50531 1.73521   6
   4   8  -6 6.18273 1.93290   4
   8  -4  -6 0.51370 1.05596   6
   8  -4  -6 0.83894 0.47929   2
  -8   4  -6 0.52355 1.33747   1
  -8   4   6 6.53056 2.64695   1
  -8   4   6 0.86329 0.65934   2
  -4  -8   6 0.65425 0.43629   5
   8  -4   6 1.08712 1.27652   6
   8  -5  -6 1.59744 0.47339   2
  -8   5  -6 0.96329 1.12944   1
   8  -5  -6 1.26181 1.05148   6
   5   8  -6 3.38217 1.46812   6
   8  -5   6 1.77478 1.13996   6
  -8   5   6 1.02259 0.62371   2
  -8   5   6 1.31977 2.05712   4
  -8   5   6 2.10780 1.58816   1
   8  -6  -6 7.21651 0.89953   2
   6   8  -6 19.5704 2.45974   6
   8  -6   6 6.64648 1.61934   6
  -8   6   6 4.61382 0.89072   2
  -8   7  -6 -0.1661 0.67415   1
   7   8  -6 1.79718 0.87535   4
   7   8  -6 2.14550 0.90136   6
   8  -7  -6 0.41278 0.24143   2
  -8   7   6 0.16470 0.29744   2
   8  -7   6 -0.1799 0.66639   6
  -6   9  -6 0.24292 0.79531   1
   6  -9  -6 0.04675 0.25286   1
   9   6  -6 1.14098 0.66162   6
  -9  -6   6 0.01469 0.64122   1
  -6   9   6 0.04927 0.25986   2
   6  -9   6 0.02285 0.19848   2
  -6   9   6 1.42991 0.79727   4
  -5   9  -6 6.26350 0.78296   2
   5  -9  -6 5.59486 1.02204   1
  -5   9   6 5.46357 1.85955   6
  -5   9   6 6.63693 0.86880   2
  -5   9   6 3.72519 1.29324   4
   5  -9   6 6.34086 0.80528   2
  -4   9  -6 0.56297 0.42475   2
  -4   9  -6 1.56102 1.45512   4
   4  -9  -6 0.48479 0.41790   1
  -4   9  -6 -0.2982 1.10253   1
   9   4  -6 3.15914 1.15700   6
  -4   9   6 0.93999 0.47097   2
  -4   9   6 0.03849 1.14466   4
  -9  -4   6 2.85420 1.53538   1
  -4   9   6 2.59037 1.62913   6
   4  -9   6 1.09459 0.38831   2
   3  -9  -6 0.65702 0.50682   1
  -3   9  -6 1.25771 0.49115   2
  -3   9  -6 0.15556 1.14689   4
   9   3  -6 0.72984 0.89972   6
  -3   9   6 1.33939 1.40080   4
  -3   9   6 0.56767 1.62782   6
  -9  -3   6 7.37614 2.35361   1
   3  -9   6 0.78312 0.40982   2
  -2   9  -6 1.95893 0.56528   2
  -2   9  -6 1.86420 1.36082   4
   2  -9  -6 1.25312 0.70281   1
  -2   9  -6 2.45445 1.64953   6
   9   2  -6 5.26294 1.51515   6
   2  -9   6 0.13222 0.68671   5
  -2   9   6 0.31058 1.58261   4
   2  -9   6 1.49591 0.47946   2
   2  -9   6 1.66563 0.90269   1
  -9  -2   6 10.1254 3.06364   1
  -2   9   6 -0.3378 1.72113   6
  -1   9  -6 20.0680 3.05720   4
  -1   9  -6 20.9985 3.67962   6
  -1   9  -6 19.2355 2.23821   2
   1  -9  -6 18.7503 2.56381   1
   1  -9   6 24.9915 3.27395   1
  -1   9   6 18.6523 4.19276   6
  -1   9   6 25.2808 3.75166   4
   1  -9   6 12.4641 2.26634   5
  -9  -1   6 21.8864 1.95980   5
   1  -9   6 21.1610 2.08813   2
   0  -9  -6 0.17739 0.58287   1
   0   9  -6 1.17028 1.45551   6
   9   0  -6 -0.9052 0.96578   6
   0   9  -6 -1.5110 1.00992   4
   0   9  -6 -0.2725 0.43354   2
   0  -9   6 -0.0678 0.34130   2
   0   9   6 -1.1397 1.56972   6
  -9   0   6 0.24485 1.68425   1
   0  -9   6 0.60653 0.58383   5
   0  -9   6 -0.0606 0.81891   1
   1   9  -6 37.8811 4.02986   4
   1   9  -6 27.2784 3.84326   6
  -1  -9  -6 22.1776 2.81032   1
   1   9  -6 24.9608 2.59618   2
   9  -1  -6 21.7268 2.27505   2
  -9   1   6 25.9323 2.44726   2
   1   9   6 22.9729 4.37969   6
  -1  -9   6 20.5685 2.21172   2
  -1  -9   6 18.6584 3.80196   1
   2   9  -6 4.90613 1.62715   4
   2   9  -6 2.19830 0.60758   2
   9  -2  -6 1.52467 0.51513   2
  -9   2  -6 0.15713 1.64397   1
   9  -2  -6 5.11921 1.55587   6
   2   9  -6 3.69844 1.60727   6
  -9   2   6 2.34945 0.65734   2
  -9   2   6 8.19605 2.84325   1
  -2  -9   6 0.66077 0.98424   1
  -2  -9   6 0.67418 0.56679   5
   9  -2   6 1.13911 1.12644   6
   3   9  -6 4.32929 1.47340   4
   9  -3  -6 0.57648 0.40345   2
   9  -3  -6 0.49527 0.96080   6
  -9   3  -6 -0.7912 1.04340   1
   3   9  -6 0.80677 1.28485   6
  -9   3   6 -0.2327 0.49255   2
  -3  -9   6 0.19395 0.87618   1
  -9   3   6 3.44737 1.90777   1
   9  -3   6 -0.7527 0.88483   6
   9  -4  -6 0.41099 0.34897   2
   9  -4  -6 1.19181 0.93585   6
  -9   4  -6 0.10842 1.06727   1
   4   9  -6 0.65712 1.08266   4
   4   9  -6 0.37974 1.15752   6
  -9   4   6 -0.0624 0.46400   2
  -4  -9   6 0.56344 0.99405   1
  -9   4   6 2.92845 1.60898   1
   9  -4   6 0.85816 0.90491   6
   9  -5  -6 13.1708 1.63579   6
   9  -5  -6 7.50739 0.92132   2
   5   9  -6 17.4168 2.36409   6
   5   9  -6 16.0448 2.01321   4
   9  -5   6 6.74867 1.50332   6
  -5  -9   6 3.20545 1.37346   1
   6   9  -6 -0.5182 0.62910   6
   9  -6  -6 -0.1807 0.18254   2
   6   9  -6 -0.1851 0.68102   4
  -9   6  -6 -0.0143 0.70275   1
  -9   6   6 0.30521 0.28422   2
  -6  -9   6 0.30610 0.65303   1
   9  -6   6 0.52817 0.63220   6
  10   4  -6 5.62107 1.06458   6
   4 -10  -6 1.68600 0.51028   1
  -4  10  -6 1.18891 0.36278   2
   4 -10   6 1.08276 0.30774   2
  -4  10   6 2.89959 1.00112   4
  -4  10   6 1.92929 1.19227   6
 -10  -4   6 4.54417 1.37352   1
   3 -10  -6 0.33600 0.34030   1
  -3  10  -6 0.70118 0.91565   4
  -3  10  -6 -0.0894 0.28646   2
  10   3  -6 0.70153 0.74810   6
   3 -10   6 0.21790 0.24272   2
  -3  10   6 1.09763 1.04277   4
 -10  -3   6 0.71455 1.00105   1
  -3  10   6 0.77628 1.13514   6
   2 -10  -6 14.1237 1.72417   1
  -2  10  -6 11.9338 2.04574   4
  -2  10  -6 15.0733 1.58174   2
  -2  10   6 13.6636 2.36418   4
   2 -10   6 14.7084 1.89532   1
  -2  10   6 8.68831 2.43092   6
   2 -10   6 12.7706 1.36062   2
  -1  10  -6 0.75863 0.38331   2
  10   1  -6 3.84464 1.20209   6
  -1  10  -6 2.36797 1.37471   6
   1 -10  -6 0.97946 0.51560   1
  -1  10  -6 0.53988 0.95191   4
   1 -10   6 0.95388 0.69022   1
 -10  -1   6 4.47819 1.94991   1
  -1  10   6 1.82312 1.30453   4
   1 -10   6 0.38660 0.30872   2
  -1  10   6 -0.2919 1.37992   6
   0 -10  -6 19.5675 2.26563   1
   0  10  -6 24.4311 2.96446   4
   0  10  -6 19.4142 1.95873   2
   0  10  -6 19.2938 2.97091   6
   0  10   6 17.6053 3.30770   6
   0 -10   6 15.5072 1.76941   2
   0 -10   6 23.0224 2.71806   1
  -1 -10  -6 1.27012 0.61136   1
   1  10  -6 0.41674 0.89622   4
  10  -1  -6 1.97839 1.01686   6
   1  10  -6 0.86828 0.49570   2
   1  10  -6 0.06251 1.07523   6
   1  10   6 1.42642 1.43551   6
 -10   1   6 5.51930 2.04028   1
  -1 -10   6 1.40663 0.87587   1
   2  10  -6 17.9173 2.74957   6
  10  -2  -6 15.5926 1.58489   2
   2  10  -6 20.4134 2.46016   4
  -2 -10   6 13.3450 2.50782   1
  10  -3  -6 -0.2686 0.20958   2
  10  -3  -6 0.29905 0.68922   6
   3  10  -6 0.04099 0.84300   6
   3  10  -6 -1.3306 0.73485   4
 -10   3  -6 1.32218 1.08809   1
  10  -3   6 -0.8119 0.61428   6
  -3 -10   6 0.17201 0.58854   1
 -10   3   6 0.50003 0.99508   1
 -10   4  -6 1.48347 1.04878   1
  10  -4  -6 1.95706 0.38673   2
   4  10  -6 2.48851 0.94381   4
   4  10  -6 2.93680 1.05152   6
  10  -4  -6 5.55307 1.03049   6
 -10   4   6 6.60363 1.59727   1
  10  -4   6 1.63686 0.79568   6
  -4 -10   6 2.42581 0.97457   1
   2 -11  -6 0.27304 0.32490   1
  11   1  -6 37.0277 3.71609   6
  11   0  -6 0.22179 0.54900   6
   0  11  -6 0.49732 0.73626   4
 -11   0   6 0.15723 0.76585   1
   0 -11   6 -0.0697 0.35140   1
  11  -1  -6 29.7189 3.10486   6
 -11   2   6 2.05794 1.15753   1
   0   0  -7 0.08160 0.52678   5
   0   1  -7 -0.0973 0.51267   5
   1   0  -7 -0.7395 0.57695   5
   0  -1  -7 -0.1002 0.50343   5
  -1   0  -7 0.53403 0.52378   5
   1   1  -7 -0.3444 0.69483   5
   1  -1  -7 -0.3012 0.63027   5
  -1   1  -7 1.08889 0.63938   5
  -1  -1  -7 0.08413 0.36951   5
  -1   2  -7 0.89584 0.57999   5
   2   1  -7 -0.1691 0.65897   5
   1  -2  -7 1.31349 0.72892   5
   1  -2  -7 -0.1088 0.37744   3
   0   2  -7 -0.3366 0.47665   5
   2   0  -7 -0.7519 0.64762   5
   0  -2  -7 -0.5692 0.45896   5
   1   2  -7 0.30463 0.59475   5
   2  -1  -7 -0.2149 0.67676   5
   2   2  -7 0.07205 0.63533   5
   2  -2  -7 0.68779 0.80917   5
   2  -3  -7 0.48513 0.75478   5
  -3  -2   7 0.71512 0.86915   2
  -1   3  -7 -0.5817 0.47759   5
   3   1  -7 0.42836 0.80057   5
   1  -3  -7 0.05408 0.57649   5
   1  -3  -7 -0.3390 0.28593   3
   0   3  -7 -0.0228 0.51989   5
   0  -3  -7 -0.1874 0.39541   5
   3   0  -7 0.59654 0.82772   5
   3  -1  -7 0.57339 0.79308   5
   1   3  -7 0.32628 0.57098   5
   3  -2  -7 1.21363 0.62543   2
   3  -2  -7 1.19416 0.89578   5
  -2  -3   7 1.74584 0.93425   5
  -3   2   7 -0.6291 6.18069   6
   3  -3  -7 0.43864 0.52360   2
  -3   3  -7 0.28505 1.90186   1
   3   3  -7 -0.7273 1.90266   6
  -3   3  -7 -0.5319 0.62465   2
   3   3  -7 -0.5359 0.48820   2
   3  -3  -7 -0.2464 0.67536   5
   3  -3  -7 0.08749 0.64181   1
  -3   3   7 -1.1044 2.27210   4
   3  -3   7 -1.1353 1.52495   6
   3  -3   7 1.21204 1.15921   4
  -3  -3   7 -1.1486 1.29970   4
  -3   3   7 -1.8708 3.16497   6
  -3  -3   7 -1.1142 1.97193   1
  -3  -3   7 -0.6550 0.62382   2
  -3  -3   7 -0.3190 0.65391   5
   3  -4  -7 -0.3383 0.61318   1
   3  -4  -7 -0.7987 0.52084   5
   4   3  -7 -1.0789 1.56110   6
   4   3  -7 -0.4959 0.49565   2
   3  -4  -7 -0.5024 0.45039   2
  -3   4  -7 -0.6832 1.56282   1
  -3   4  -7 -0.0168 0.66729   2
  -3   4   7 -0.7971 2.80648   6
  -3   4   7 -1.7502 1.87699   4
   3  -4   7 -0.0954 1.59355   6
  -4  -3   7 -0.4623 1.11092   4
  -4  -3   7 0.30749 1.92668   1
  -3   4   7 0.92397 0.92701   2
   3  -4   7 0.79497 0.98238   4
  -4  -3   7 -0.4735 0.70208   5
  -4  -3   7 -0.0566 0.62199   2
   2  -4  -7 0.46656 0.58336   5
   2  -4  -7 0.75281 0.49575   2
  -2   4  -7 0.19345 0.54864   2
   2  -4  -7 -0.2885 0.60639   1
   4   2  -7 0.15594 0.52999   2
   4   2  -7 0.71814 1.75983   6
  -2   4  -7 -0.1212 1.80175   1
  -2   4  -7 2.26613 2.15859   4
  -4  -2   7 -0.5152 0.63142   2
   2  -4   7 -0.2377 0.67884   2
  -2   4   7 0.71297 2.69757   4
   2  -4   7 1.37768 1.17927   4
  -4  -2   7 -1.3982 1.74682   1
  -2   4   7 -2.4822 2.79652   6
  -4  -2   7 -1.4099 1.33790   4
   2  -4   7 0.48749 1.63068   6
  -4  -2   7 -0.3501 2.39097   6
   4   1  -7 6.84179 2.48845   6
   4   1  -7 2.33925 0.80529   2
  -1   4  -7 3.09318 0.77625   5
  -1   4  -7 1.80966 0.76521   2
   1  -4  -7 2.51439 0.56379   3
  -1   4  -7 6.67051 2.50562   4
  -1   4  -7 0.28566 2.07262   1
   1  -4  -7 2.45160 0.77257   5
   1  -4   7 1.43573 2.12899   6
  -4  -1   7 0.79004 0.87227   2
  -4  -1   7 10.1743 3.64399   1
  -4  -1   7 0.67476 1.71842   4
   1  -4   7 2.45635 1.04406   2
   1  -4   7 1.95907 1.19645   4
  -4  -1   7 0.85637 2.77754   6
   4   0  -7 0.24619 1.73819   6
   0   4  -7 -0.4798 0.45416   5
   0   4  -7 0.03863 0.52362   2
   0  -4  -7 -0.2198 0.28776   5
   4   0  -7 0.70739 0.58521   2
   0   4  -7 -0.4788 2.30484   1
   0  -4   7 1.08837 2.14049   6
  -4   0   7 -0.3737 0.78652   2
  -4   0   7 1.31405 3.23503   6
   0  -4   7 -1.0504 1.00297   4
  -4   0   7 0.73341 2.11231   1
   0  -4   7 0.78795 0.70936   2
  -4   0   7 -4.1772 1.52511   4
   1   4  -7 1.79538 0.74791   2
   4  -1  -7 1.83581 1.14758   1
   4  -1  -7 2.75041 0.81417   2
   1   4  -7 7.61364 2.68794   6
   4  -1  -7 1.65227 0.98208   5
   1   4  -7 -0.4682 2.53415   1
   4  -1  -7 8.00782 2.43523   6
  -1  -4   7 1.67190 1.24323   4
  -4   1   7 3.38664 2.47317   4
  -1  -4   7 3.89993 1.04977   2
  -4   1   7 3.03604 3.70837   6
  -1  -4   7 4.22976 1.21362   5
  -4   1   7 1.02025 1.00479   2
  -4   1   7 9.27782 3.51438   1
  -1  -4   7 2.74698 2.69390   1
  -1  -4   7 1.83994 2.37598   6
   4  -2  -7 0.24143 0.65320   1
  -4   2  -7 0.81057 2.00146   1
   4  -2  -7 -1.5863 0.58844   5
   2   4  -7 0.66684 2.31738   1
   2   4  -7 0.76068 0.58007   2
   4  -2  -7 -0.1104 0.47749   2
   4  -2  -7 1.93651 1.85693   6
   2   4  -7 0.77149 1.75124   6
  -4   2   7 -1.7404 3.08876   6
  -2  -4   7 -0.2355 0.64950   5
  -2  -4   7 1.31361 2.13225   6
  -2  -4   7 0.20031 1.22945   4
  -2  -4   7 0.36518 0.60570   2
  -4   2   7 -0.1362 1.99146   1
  -4   2   7 0.34197 0.77574   2
   4  -2   7 1.08490 1.91457   6
  -4   2   7 -0.3141 2.49461   4
  -2  -4   7 -0.7321 1.77005   1
   4  -3  -7 -0.2504 0.55221   1
   4  -3  -7 0.49483 0.52006   2
   3   4  -7 0.18955 0.53067   2
  -4   3  -7 -0.1660 0.61491   2
   3   4  -7 -0.3920 1.68208   6
   4  -3  -7 0.72653 0.83980   5
  -4   3  -7 0.11216 1.57045   1
   4  -3  -7 -0.5375 1.50318   6
  -3  -4   7 0.95724 2.06183   1
  -3  -4   7 -0.6249 1.11171   4
  -4   3   7 -0.2095 0.74737   2
  -3  -4   7 -0.2577 0.59997   2
  -4   3   7 -0.0925 2.08453   1
   4  -3   7 0.56729 1.53234   6
  -4   3   7 0.34773 2.20790   4
  -3  -4   7 -0.0207 0.65963   5
  -4   3   7 1.22736 3.21141   6
   4  -3   7 0.21392 1.11641   4
  -4   4  -7 0.19240 1.65033   1
   4  -4  -7 0.23415 0.82002   5
  -4   4  -7 0.26656 0.57355   2
   4   4  -7 0.30261 0.52887   2
   4   4  -7 2.22114 1.89327   6
   4  -4  -7 0.68975 0.53903   2
   4  -4  -7 0.09805 0.60548   1
  -4  -4   7 1.23465 0.77176   5
  -4  -4   7 0.05819 1.97414   1
  -4  -4   7 0.66830 1.10299   4
  -4  -4   7 0.93630 0.66371   2
  -4   4   7 -2.8737 1.95075   4
  -4   4   7 0.13531 2.74921   6
   4  -4   7 -0.0393 1.45111   6
   4  -4   7 -0.6960 1.44135   6
  -4   4   7 0.39783 0.74695   2
   4  -4   7 0.56502 1.11371   4
  -4   5  -7 0.14670 1.44761   1
   5   4  -7 0.07121 1.70450   6
   5   4  -7 0.79036 0.51104   2
   4  -5  -7 0.45771 0.67690   1
   4  -5  -7 1.17480 0.86466   5
   4  -5  -7 -0.6740 0.49485   2
  -4   5  -7 1.03926 0.68760   2
  -5  -4   7 0.69278 0.69597   5
  -5  -4   7 1.38261 2.16463   1
  -4   5   7 2.09167 2.40900   4
  -4   5   7 0.75547 2.87829   6
  -5  -4   7 1.51751 0.66446   2
  -4   5   7 -0.2232 0.67269   2
   4  -5   7 -0.7224 0.96781   4
   4  -5   7 1.63018 1.91379   6
   4  -5   7 1.46814 0.72980   2
   3  -5  -7 0.15257 0.51994   2
  -3   5  -7 1.23698 1.93465   4
  -3   5  -7 -0.9150 1.41003   1
  -3   5  -7 0.10162 0.58820   2
   3  -5  -7 -0.1026 0.51925   1
   5   3  -7 0.22750 0.50853   2
   5   3  -7 -0.5231 1.42867   6
   3  -5  -7 -0.5657 0.57666   5
   3  -5   7 0.10143 0.92091   4
  -5  -3   7 0.76433 0.77914   5
   3  -5   7 0.14291 1.41413   6
  -3   5   7 -0.9193 1.92494   4
   3  -5   7 0.09546 0.64732   2
  -5  -3   7 1.48321 2.15523   1
  -5  -3   7 0.02568 0.56112   2
  -3   5   7 -1.8156 2.58107   6
   3  -5   7 -1.6583 1.31653   6
  -2   5  -7 0.54522 1.62172   1
   2  -5  -7 1.24622 0.69746   5
  -2   5  -7 1.31611 1.93957   4
   2  -5  -7 1.26293 0.95252   1
   2  -5  -7 1.00109 0.51300   2
   5   2  -7 -0.0051 0.45790   2
  -2   5  -7 0.53320 0.61916   2
   5   2  -7 2.33302 1.70793   6
   2  -5   7 1.03670 1.13142   4
  -5  -2   7 1.62536 1.36575   4
  -2   5   7 2.14817 2.56827   4
  -5  -2   7 0.98965 0.71161   2
  -2   5   7 1.48158 3.06317   6
   2  -5   7 -0.2017 1.75705   6
   2  -5   7 0.10500 0.62206   2
  -5  -2   7 5.70480 3.02290   1
   1  -5  -7 0.04096 0.27785   3
  -1   5  -7 1.63159 1.79666   4
   5   1  -7 0.15346 0.59142   2
   1  -5  -7 -0.3065 0.46528   5
  -1   5  -7 -0.5905 0.48983   2
   1  -5  -7 -0.4543 0.60011   1
  -1   5  -7 -0.3463 1.91500   6
   5   1  -7 -0.1732 1.48249   6
  -1   5  -7 1.37373 2.04592   1
   1  -5   7 0.04243 1.04437   4
  -1   5   7 -0.2809 2.52024   6
   1  -5   7 -0.4537 1.70344   6
  -5  -1   7 -0.9963 1.43111   4
  -5  -1   7 -0.3929 1.66193   1
   1  -5   7 -0.0775 1.49633   1
  -1   5   7 0.54262 2.79682   4
   1  -5   7 0.66346 0.65512   2
  -5  -1   7 -0.2745 0.54566   2
   0   5  -7 1.08386 1.96448   6
   0   5  -7 0.65168 0.64970   5
   5   0  -7 -0.0130 0.47073   2
   0   5  -7 0.23017 0.51190   2
   0  -5  -7 -0.2516 0.67061   1
   5   0  -7 -0.3998 0.90123   1
   5   0  -7 -1.3684 1.20135   6
   0   5  -7 0.73123 1.88250   1
   0  -5   7 -0.7177 0.53648   2
  -5   0   7 -0.8140 1.72031   1
   0  -5   7 0.75446 1.05572   4
  -5   0   7 1.29767 1.82875   4
  -5   0   7 0.01762 0.69870   2
  -5   0   7 2.13441 2.86855   6
   0  -5   7 -0.7833 1.65804   6
   1   5  -7 4.29572 2.36521   6
   1   5  -7 -0.8356 0.51984   2
   5  -1  -7 -0.3341 1.49928   6
   5  -1  -7 -0.2263 0.48258   2
   1   5  -7 1.96878 2.27160   1
   5  -1  -7 -0.2200 0.63011   1
  -1  -5   7 0.50951 1.73369   6
  -1  -5   7 0.51375 0.75083   5
  -5   1   7 -0.5755 1.98331   1
  -5   1   7 -0.3222 2.77625   6
  -5   1   7 -0.0997 0.71864   2
  -1  -5   7 -0.1381 0.61356   2
  -5   1   7 -1.3770 1.76909   4
  -1  -5   7 0.67418 1.10457   4
   2   5  -7 0.70818 2.02019   1
   2   5  -7 0.63097 1.81819   6
   5  -2  -7 0.87237 0.60809   2
   5  -2  -7 0.14475 0.66587   1
   2   5  -7 1.24386 0.63451   2
   5  -2  -7 -0.1666 1.58076   6
  -5   2  -7 -0.2585 1.56683   1
  -2  -5   7 1.61939 0.72563   2
  -5   2   7 -0.6595 3.04992   6
   5  -2   7 -0.4080 1.53615   6
  -2  -5   7 1.98752 2.20042   1
  -2  -5   7 0.77382 1.91079   6
  -5   2   7 0.44428 0.74925   2
  -2  -5   7 0.86434 1.17570   4
  -5   2   7 0.99690 2.00071   4
  -2  -5   7 0.14468 0.78782   5
  -5   2   7 1.29790 2.47739   1
   5  -3  -7 0.10522 0.48012   2
   5  -3  -7 0.77095 0.90318   5
   3   5  -7 0.05427 0.44067   2
  -5   3  -7 -0.3980 1.33399   1
   3   5  -7 0.35025 1.81018   6
   5  -3  -7 0.35475 1.64636   6
   5  -3  -7 0.01635 0.58509   1
   5  -3   7 1.13016 1.58140   6
  -5   3   7 -2.2837 2.95533   6
   5  -3   7 0.28055 1.13784   4
  -3  -5   7 0.79131 1.14533   4
  -5   3   7 -0.5566 0.75000   2
  -5   3   7 -1.0491 1.98138   4
  -5   3   7 -1.4152 1.96547   1
  -3  -5   7 -0.7008 1.58916   1
  -3  -5   7 -0.8029 0.60265   5
  -3  -5   7 -0.1373 0.50212   2
   5  -3   7 0.83404 1.63651   6
   5  -4  -7 0.26818 0.81523   5
   5  -4  -7 0.59680 1.43313   6
   4   5  -7 0.89692 1.62085   6
   4   5  -7 0.10102 0.50357   2
   5  -4  -7 0.68273 0.73352   1
  -5   4  -7 -0.0277 0.54136   2
  -5   4  -7 0.38723 1.47921   1
   5  -4  -7 1.23057 0.62796   2
  -4  -5   7 -1.1470 0.60812   5
  -4  -5   7 0.86633 0.62199   2
  -5   4   7 -1.2645 3.08661   6
  -5   4   7 0.99301 2.34330   1
  -4  -5   7 0.19961 1.69608   1
   5  -4   7 2.18944 1.75938   6
  -5   4   7 0.21826 0.83248   2
  -5   4   7 1.65009 2.44246   4
  -5   5  -7 0.02953 0.58822   2
   5   5  -7 0.57061 1.57243   6
   5  -5  -7 0.91467 0.79702   5
   5  -5  -7 0.28129 0.62731   1
   5  -5  -7 -0.0674 0.52999   2
  -5   5  -7 -0.2909 1.16804   1
  -5  -5   7 0.36317 1.81611   1
  -5  -5   7 0.03475 0.51407   2
  -5   5   7 0.25114 0.66147   2
  -5   5   7 2.50383 2.49467   4
  -5  -5   7 0.22779 0.57900   5
  -5   5   7 1.01819 2.94378   6
   5  -5   7 -1.2765 1.32574   6
  -5   6  -7 -0.0105 0.53663   2
  -5   6  -7 -0.0350 1.25326   1
   5  -6  -7 -0.2137 0.46126   2
   5  -6  -7 0.05891 0.62498   5
   6   5  -7 1.41608 1.45912   6
   5  -6  -7 0.13473 0.58086   1
   5  -6   7 -0.2869 0.45984   2
  -5   6   7 -1.8633 2.29750   6
  -5   6   7 0.64272 2.06119   4
   5  -6   7 0.88711 1.58865   6
  -6  -5   7 0.05869 0.54061   5
  -5   6   7 0.31020 0.61725   2
  -6  -5   7 -0.0299 1.58899   1
   4  -6  -7 0.03493 0.61946   5
  -4   6  -7 0.57216 1.46095   1
   4  -6  -7 0.06181 0.55687   1
  -4   6  -7 -0.3717 0.54055   2
   4  -6  -7 0.29420 0.49673   2
   6   4  -7 0.27463 1.50950   6
  -4   6   7 0.05369 2.58190   6
   4  -6   7 -0.5201 0.53246   2
   4  -6   7 0.85476 1.58399   6
  -6  -4   7 0.90628 1.93049   1
  -6  -4   7 0.65417 0.54543   2
  -4   6   7 0.80542 0.79108   2
  -4   6   7 1.21686 2.26078   4
  -6  -4   7 0.00673 0.56280   5
  -3   6  -7 -0.3006 1.38707   1
  -3   6  -7 -0.2186 0.59740   2
   6   3  -7 -0.7250 1.42968   6
  -3   6  -7 2.70362 1.82265   4
   3  -6  -7 0.01246 0.45934   2
   3  -6  -7 0.11963 0.56112   5
   3  -6  -7 0.45896 0.69597   1
  -3   6   7 -0.0778 2.28483   4
   3  -6   7 0.68951 0.63142   2
  -6  -3   7 0.68989 2.07093   1
  -3   6   7 -0.0652 2.88200   6
  -6  -3   7 -0.1460 0.56718   2
   3  -6   7 0.67077 1.04755   4
  -6  -3   7 0.17647 0.65916   5
   3  -6   7 0.08213 1.60787   6
   2  -6  -7 -0.5159 0.36941   2
   6   2  -7 -0.3331 0.44745   2
   2  -6  -7 0.38507 0.50817   5
   2  -6  -7 -0.1342 0.52280   1
  -2   6  -7 -0.0825 0.48072   2
  -2   6  -7 0.06633 1.64035   4
   6   2  -7 0.20178 1.41654   6
  -2   6  -7 -0.2737 1.50805   1
  -2   6  -7 1.64534 2.34367   6
   2  -6   7 1.08997 1.02534   4
   2  -6   7 0.30735 0.57717   2
   2  -6   7 0.09487 1.30243   1
   2  -6   7 1.04192 1.77326   6
  -6  -2   7 0.58756 2.06598   1
  -2   6   7 0.96127 2.05314   4
  -6  -2   7 0.39099 0.58439   2
   2  -6   7 -0.8418 1.40463   6
  -2   6   7 -1.5325 2.38185   6
   6   1  -7 0.31104 0.53725   2
  -1   6  -7 -1.6113 1.65843   6
   6   1  -7 -0.3996 1.53028   6
   1  -6  -7 0.66109 0.40900   5
  -1   6  -7 1.77393 1.59367   4
  -1   6  -7 0.62133 1.72384   1
   1  -6  -7 0.07403 0.63636   1
  -1   6  -7 0.06735 0.55337   2
   1  -6   7 -1.0801 1.43819   6
   1  -6   7 -0.2167 0.55529   2
   1  -6   7 -0.3478 1.12400   1
  -1   6   7 -0.2607 2.44472   4
  -6  -1   7 0.58855 1.69696   1
   1  -6   7 1.29298 1.19822   4
  -6  -1   7 0.25215 0.63574   2
   1  -6   7 1.16850 1.60977   6
  -6  -1   7 -1.0102 1.40792   4
  -1   6   7 -0.2488 2.32380   6
   0   6  -7 0.66480 1.71860   1
   0   6  -7 0.05561 1.64356   4
   0   6  -7 -0.2803 0.45540   2
   0   6  -7 0.47617 1.81549   6
   0  -6  -7 -0.1327 0.66283   1
   6   0  -7 -0.2242 0.46078   2
   6   0  -7 -0.9129 1.30960   6
   0  -6   7 0.87312 0.82839   5
   0  -6   7 -1.7465 1.39904   6
  -6   0   7 0.22510 1.58388   4
  -6   0   7 -0.2940 0.71112   2
   0  -6   7 2.27360 1.23522   4
   0  -6   7 1.13756 0.69990   2
  -6   0   7 0.81819 1.87229   1
   0   6   7 -2.6262 2.54829   6
   6  -1  -7 -0.0379 1.62737   6
   1   6  -7 0.69194 1.71614   6
   1   6  -7 -0.1456 1.69768   1
   6  -1  -7 0.04583 0.53139   2
   6  -1  -7 -0.3459 0.99575   1
   1   6  -7 -0.5860 0.47360   2
  -1  -6   7 1.12448 0.82007   5
  -6   1   7 0.47660 0.78928   2
  -6   1   7 2.22354 3.66048   6
  -6   1   7 -0.3328 1.71556   4
  -6   1   7 -0.0913 1.83541   1
  -1  -6   7 1.14048 1.75849   6
  -1  -6   7 -0.1086 0.60379   2
  -1  -6   7 0.30539 1.07377   4
   2   6  -7 0.41203 0.53280   2
   2   6  -7 -1.0677 1.60527   6
   6  -2  -7 0.74358 0.82935   1
  -6   2  -7 0.71307 1.70182   1
   6  -2  -7 -0.1811 0.43427   2
   6  -2  -7 -1.9492 1.27289   6
  -2  -6   7 -0.1538 0.58752   2
  -2  -6   7 0.05661 0.67602   5
  -6   2   7 3.46450 2.21030   4
  -6   2   7 -1.3975 2.68356   6
  -6   2   7 -0.3440 2.01207   1
  -2  -6   7 1.14439 1.11468   4
  -6   2   7 -0.2847 0.72243   2
   6  -2   7 -1.0417 1.52626   6
   3   6  -7 0.82260 0.57509   2
   6  -3  -7 1.02197 1.59310   6
   3   6  -7 2.09293 1.91567   6
   6  -3  -7 0.09151 0.65924   1
   6  -3  -7 0.58654 0.58010   2
  -6   3  -7 0.07369 1.37203   1
  -6   3   7 0.89635 0.77364   2
   6  -3   7 -0.4068 1.41649   6
  -3  -6   7 -0.3235 0.53430   2
  -3  -6   7 -0.4053 1.60532   1
  -3  -6   7 0.51014 0.70712   5
  -6   3   7 0.42815 2.98654   6
  -6   3   7 -1.0572 2.13343   1
  -6   3   7 5.84947 2.36394   4
  -6   4  -7 -0.0565 1.25433   1
   4   6  -7 0.12591 1.62682   6
   4   6  -7 0.46712 0.55067   2
   6  -4  -7 0.94915 0.59226   2
   6  -4  -7 -0.5314 1.31176   6
   6  -4  -7 -0.4613 0.47671   1
  -4  -6   7 0.18166 0.51836   2
   6  -4   7 -1.1933 1.33286   6
  -6   4   7 -0.1186 0.69812   2
  -6   4   7 -0.6834 2.84609   6
  -4  -6   7 -0.0464 1.57229   1
  -6   4   7 -0.4374 1.93365   4
  -4  -6   7 -0.5641 0.48329   5
  -6   4   7 -0.0750 2.09051   1
   6  -5  -7 0.26721 0.46496   2
   6  -5  -7 0.88683 0.79561   5
   5   6  -7 -0.1221 1.32348   6
  -6   5  -7 1.02687 1.40291   1
   6  -5  -7 0.09872 0.54014   1
   6  -5   7 -0.6700 1.38737   6
  -6   5   7 -0.5286 2.62892   6
  -5  -6   7 0.41977 0.43790   2
  -5  -6   7 -0.5618 0.44585   5
  -5  -6   7 1.27473 1.66446   1
  -6   5   7 1.46198 0.76823   2
  -6   5   7 -0.6760 2.03292   4
  -6   6  -7 -0.7986 0.95032   1
   6  -6  -7 1.06135 0.67927   5
  -6   6  -7 0.02323 0.55135   2
   6   6  -7 1.82212 1.37488   6
   6  -6  -7 0.44341 0.43775   2
   6  -6  -7 -0.1365 0.42538   1
  -6  -6   7 -0.8872 1.09762   1
  -6   6   7 0.23129 2.30322   6
  -6   6   7 1.19087 1.68088   4
  -6  -6   7 0.03776 0.40587   5
  -6   6   7 -0.0151 0.54792   2
   6  -6   7 -0.5741 1.07757   6
  -6   7  -7 -0.7145 0.81161   1
   6  -7  -7 -0.0707 0.36541   1
  -6   7  -7 0.01644 0.39514   2
   6  -7  -7 0.09282 0.30668   2
   7   6  -7 -0.7450 0.83712   6
  -6   7   7 -0.5623 0.34760   2
  -6   7   7 -0.3417 1.20454   4
  -7  -6   7 0.28239 1.09819   1
  -6   7   7 -0.3351 1.76553   6
   6  -7   7 -1.1416 0.93491   6
   6  -7   7 0.34772 0.38131   2
  -5   7  -7 -0.3291 0.45091   2
   5  -7  -7 -0.3313 0.33765   1
   7   5  -7 0.05565 1.05430   6
  -5   7  -7 0.99112 1.32762   1
   5  -7  -7 -0.5480 0.46976   5
   5  -7  -7 -0.1387 0.37051   2
  -5   7   7 -0.3170 0.53489   2
  -5   7   7 1.48458 2.18375   6
   5  -7   7 -0.1913 0.37948   2
  -7  -5   7 -0.1214 1.29586   1
  -5   7   7 -0.3910 1.50851   4
   5  -7   7 -1.0016 1.03032   6
   4  -7  -7 0.80602 0.57910   5
  -4   7  -7 0.89642 1.28442   1
   4  -7  -7 0.04137 0.47673   1
   4  -7  -7 0.39936 0.39657   2
   7   4  -7 -0.8358 1.10249   6
  -4   7  -7 0.61036 0.54691   2
  -7  -4   7 -2.2463 1.21815   1
  -4   7   7 1.21991 0.69639   2
  -7  -4   7 0.83211 0.55495   5
  -4   7   7 -1.1413 1.56523   4
   4  -7   7 -0.1591 1.44554   6
  -4   7   7 0.61018 2.25652   6
   4  -7   7 0.48722 0.51477   2
  -3   7  -7 0.23091 1.45883   1
   3  -7  -7 0.06868 0.48945   5
   7   3  -7 -0.6139 1.21086   6
   3  -7  -7 0.52195 0.43013   2
  -3   7  -7 0.23142 1.56618   4
  -3   7  -7 1.18650 0.63175   2
   3  -7  -7 0.08479 0.56697   1
  -7  -3   7 0.17465 0.52967   5
   3  -7   7 -0.5017 1.37788   6
  -3   7   7 -3.0773 2.17782   6
  -7  -3   7 -0.4000 1.70222   1
  -7  -3   7 -0.1688 0.50797   2
  -3   7   7 -0.4748 1.96566   4
   3  -7   7 -0.5830 0.43342   2
   2  -7  -7 -0.1745 0.52668   1
   2  -7  -7 0.54416 0.49129   5
  -2   7  -7 -1.3429 1.87519   6
  -2   7  -7 0.06979 0.54425   2
   7   2  -7 -0.2622 1.26985   6
  -2   7  -7 -2.5668 1.28153   4
  -2   7  -7 -0.7739 1.26647   1
   2  -7   7 -0.1388 1.05306   1
   2  -7   7 0.15411 0.56366   2
  -2   7   7 -0.7353 2.26196   6
  -7  -2   7 -0.2781 1.81487   1
  -2   7   7 -0.5471 2.19863   4
  -7  -2   7 -1.0136 0.47505   2
   2  -7   7 0.13348 1.50908   6
   1  -7  -7 -0.2833 0.59997   1
  -1   7  -7 -0.2113 1.43987   1
   7   1  -7 1.46321 1.66365   6
  -1   7  -7 1.64825 1.59633   4
  -1   7  -7 0.61187 0.54291   2
  -1   7  -7 0.64692 1.70677   6
   7   1  -7 -0.0303 0.48671   2
  -1   7   7 -0.5087 2.33437   4
   1  -7   7 1.00545 0.58416   2
   1  -7   7 -0.1759 1.56409   6
  -1   7   7 1.71775 2.37747   6
   1  -7   7 -0.2442 1.19885   1
   1  -7   7 0.89268 1.01349   4
  -7  -1   7 1.06354 0.65252   2
  -7  -1   7 -0.1629 1.75991   1
   0   7  -7 -0.4202 0.46859   2
   0   7  -7 1.44750 1.87956   1
   0  -7  -7 0.25110 0.70634   1
   0   7  -7 1.04053 1.61782   4
   7   0  -7 0.65431 0.52146   2
   0   7  -7 -1.5097 1.54735   6
   7   0  -7 -0.2585 1.47824   6
   0  -7   7 0.26862 1.12784   4
   0  -7   7 0.19213 1.18911   1
  -7   0   7 -0.7719 1.59265   1
   0  -7   7 0.64111 0.58646   2
   0  -7   7 3.61165 2.55377   6
   0   7   7 -1.2385 2.44733   6
  -7   0   7 -0.4195 0.61217   2
   0  -7   7 -1.0190 0.64260   5
   1   7  -7 -0.8657 1.51730   4
   7  -1  -7 0.09278 1.45385   6
   1   7  -7 0.66960 1.78339   6
   7  -1  -7 -0.5029 0.43601   2
   1   7  -7 0.34271 0.49625   2
  -7   1   7 2.38154 1.78456   4
  -1  -7   7 -1.2960 0.91881   4
  -7   1   7 1.12991 0.85604   2
  -7   1   7 1.22347 2.18203   1
  -1  -7   7 0.35819 0.72806   5
  -1  -7   7 0.55563 0.60448   2
   7  -2  -7 0.42124 0.50291   2
   7  -2  -7 -1.0246 1.26718   6
  -7   2  -7 -0.5793 1.56817   1
   2   7  -7 0.86556 1.85445   6
   2   7  -7 -0.0015 0.55392   2
   7  -2   7 -1.7213 1.37464   6
  -7   2   7 0.41296 2.04355   1
  -2  -7   7 0.09528 0.61019   5
  -7   2   7 0.26547 0.84705   2
  -7   2   7 4.00381 2.08314   4
  -2  -7   7 0.05532 0.59731   2
   3   7  -7 -0.6833 1.60777   6
  -7   3  -7 -1.0178 1.24774   1
   3   7  -7 0.57849 0.52747   2
   7  -3  -7 -0.0094 0.47953   2
   7  -3  -7 0.10597 1.36882   6
  -3  -7   7 -0.4366 0.52781   5
  -3  -7   7 -0.1498 0.47291   2
  -7   3   7 -1.1623 1.71095   4
  -7   3   7 -1.0237 1.77747   1
   7  -3   7 -0.0017 1.32845   6
  -7   3   7 -0.1991 0.69649   2
   7  -4  -7 -0.1344 0.44520   2
   4   7  -7 1.15419 1.59162   6
   7  -4  -7 -0.3898 0.70351   1
  -7   4  -7 -0.4045 1.05814   1
   7  -4  -7 0.60416 1.28131   6
  -7   4   7 -0.2467 0.67318   2
   7  -4   7 -0.5004 1.20255   6
  -4  -7   7 -0.2094 0.39737   2
  -7   4   7 1.68492 1.81960   4
  -4  -7   7 0.72656 0.57663   5
  -7   4   7 0.45590 1.73055   1
  -7   5  -7 0.11729 1.17494   1
   7  -5  -7 -0.4536 0.45338   1
   7  -5  -7 -0.0913 0.37812   2
   5   7  -7 0.01172 1.30381   6
  -7   5   7 1.69849 2.92727   6
   7  -5   7 -0.5569 1.09451   6
  -5  -7   7 0.36801 0.45577   5
  -7   5   7 -0.0280 1.58878   1
  -7   5   7 -0.3258 0.52549   2
  -7   5   7 3.51520 1.75626   4
  -7   6  -7 -0.1609 0.98062   1
   7  -6  -7 -0.0589 0.41847   1
   6   7  -7 1.40581 1.21140   6
   7  -6  -7 0.20299 0.33578   2
  -7   6   7 0.04134 0.44641   2
  -7   6   7 2.01921 1.27015   4
   7  -6   7 -0.1909 1.06083   6
  -7   7  -7 0.01432 0.80246   1
   7  -7  -7 0.00520 0.26013   2
   7  -7  -7 -0.0082 0.53030   1
   7   7  -7 0.86362 0.86678   6
  -7   7   7 0.32819 0.33475   2
  -7   7   7 0.79458 0.92819   4
   7  -7   7 -0.0696 0.87207   6
   7  -7   7 0.38163 0.36274   2
   8   7  -7 0.36697 0.67568   6
  -7   8  -7 0.04894 0.66355   1
  -7   8   7 -0.1640 0.22583   2
  -7   8   7 0.25808 0.64186   4
   7  -8   7 0.44649 0.66812   6
   6  -8  -7 -0.2160 0.23135   2
   6  -8  -7 -0.2414 0.25778   1
  -6   8  -7 -0.6376 0.67546   1
   8   6  -7 0.04752 0.78346   6
  -8  -6   7 -0.4768 0.73893   1
  -6   8   7 -0.5855 1.26153   6
   6  -8   7 -0.4034 0.74623   6
  -6   8   7 0.23778 0.32807   2
  -6   8   7 -1.7090 0.78205   4
   6  -8   7 0.16385 0.28435   2
   5  -8  -7 -0.3181 0.26627   2
  -5   8  -7 -0.8718 0.72456   1
   8   5  -7 0.50342 0.93139   6
   5  -8  -7 0.00151 0.35442   1
  -5   8  -7 0.22922 0.38270   2
  -5   8   7 -0.3663 1.04811   4
   5  -8   7 -0.3879 0.30165   2
  -8  -5   7 -0.2475 0.91255   1
  -5   8   7 0.47798 1.56697   6
  -5   8   7 -0.0974 0.43057   2
   5  -8   7 -0.7042 0.94939   6
   4  -8  -7 -0.0113 0.41529   5
  -4   8  -7 0.08100 0.41571   2
  -4   8  -7 0.44055 1.21844   1
   4  -8  -7 -0.1173 0.31115   1
   8   4  -7 0.33536 1.12056   6
  -4   8   7 -0.3563 1.40849   4
   4  -8   7 -0.0702 1.14655   6
  -4   8   7 0.41715 0.56148   2
   4  -8   7 0.02012 0.37438   2
  -4   8   7 0.83630 1.86273   6
  -8  -4   7 -0.1392 1.13012   1
   8   3  -7 0.72781 1.15690   6
  -3   8  -7 -0.9079 1.37268   4
   3  -8  -7 0.38542 0.35815   5
  -3   8  -7 0.27902 1.31548   1
   3  -8  -7 0.00711 0.43445   1
  -3   8  -7 0.32034 0.46044   2
   3  -8   7 0.29228 1.24001   6
  -8  -3   7 0.13340 1.48593   1
  -8  -3   7 -0.3695 0.42428   5
   3  -8   7 -0.4404 0.36798   2
  -3   8   7 0.40084 1.79960   4
  -3   8   7 -2.9295 1.79272   6
  -2   8  -7 -0.2381 0.46410   2
   8   2  -7 0.18928 1.17412   6
   2  -8  -7 0.46009 0.60407   1
  -2   8  -7 0.17849 1.27436   1
  -2   8  -7 2.68360 1.39424   4
  -2   8  -7 1.94142 1.88060   6
  -2   8   7 0.23144 1.97590   4
   2  -8   7 1.38666 1.46073   6
   2  -8   7 0.07062 0.83101   1
  -2   8   7 1.45830 2.18614   6
  -8  -2   7 -0.5674 1.41331   1
  -8  -2   7 -0.4337 0.55043   5
   2  -8   7 -0.2639 0.43736   2
  -1   8  -7 0.19179 1.61718   6
  -1   8  -7 0.70679 0.53358   2
  -1   8  -7 1.00325 1.40946   4
   1  -8  -7 1.08478 0.72193   1
   8   1  -7 -0.0725 0.47236   2
   8   1  -7 0.03886 1.24513   6
   1  -8   7 0.20451 0.48244   2
   1  -8   7 -0.0352 0.70534   5
  -8  -1   7 0.48798 1.98829   1
   1  -8   7 1.13281 1.16691   1
  -1   8   7 3.13378 2.03187   4
  -1   8   7 0.74729 2.20657   6
  -8  -1   7 0.49099 0.55856   2
   8   0  -7 -0.0861 0.46684   2
   0   8  -7 -0.4441 0.38574   2
   0   8  -7 1.55519 1.51958   4
   8   0  -7 0.69228 1.41262   6
   0  -8  -7 -0.2423 0.49694   1
   0   8  -7 0.61407 1.63434   6
  -8   0   7 0.33961 1.90019   1
  -8   0   7 -0.3603 0.53894   2
   0  -8   7 -0.7905 0.63084   5
   0   8   7 0.40881 2.10168   6
   0  -8   7 -0.3413 1.01573   1
   0  -8   7 0.54735 0.50620   2
   8  -1  -7 0.07879 1.29118   6
   1   8  -7 0.04742 1.50886   6
   1   8  -7 1.35758 1.44244   4
   8  -1  -7 -0.0872 0.39922   2
   1   8  -7 -0.4452 0.43219   2
  -8   1   7 1.38216 2.08336   1
  -1  -8   7 0.12693 0.67629   5
  -1  -8   7 -0.0347 1.05601   1
  -1  -8   7 0.19253 0.46762   2
  -8   1   7 -0.2616 0.54330   2
   2   8  -7 -1.8249 1.36566   6
   8  -2  -7 -0.1724 1.12655   6
   2   8  -7 0.66579 1.32882   4
   8  -2  -7 0.33699 0.45841   2
  -8   2  -7 0.66921 2.18918   1
   2   8  -7 -0.8227 0.39309   2
  -2  -8   7 -0.8850 0.49270   5
  -2  -8   7 0.32407 0.42183   2
  -8   2   7 -1.0124 0.67909   2
  -8   2   7 -0.0688 1.66382   1
   8  -3  -7 -0.5626 0.37135   2
  -8   3  -7 -0.2083 1.25616   1
   8  -3  -7 1.65650 1.27337   6
   3   8  -7 -1.6226 1.04776   4
   3   8  -7 -0.3096 0.43765   2
   3   8  -7 -0.4390 1.27060   6
   8  -3   7 0.93700 1.24631   6
  -3  -8   7 -1.2392 0.40252   5
  -8   3   7 -0.2469 1.55268   1
  -3  -8   7 0.28851 0.38368   2
  -8   3   7 1.13120 0.73342   2
   8  -4  -7 -0.1119 0.34797   2
   4   8  -7 -0.4540 1.21351   6
   8  -4  -7 -0.6013 0.92134   6
   4   8  -7 0.06584 1.12252   4
  -8   4  -7 -0.3474 1.03439   1
  -4  -8   7 0.95347 0.45096   5
  -8   4   7 -0.7491 1.51868   4
  -8   4   7 -0.1780 1.45859   1
  -8   4   7 -1.0728 0.46351   2
   8  -4   7 0.27441 1.08925   6
   5   8  -7 0.43966 1.00220   6
  -8   5  -7 0.04278 1.00840   1
   8  -5  -7 -0.7786 0.26260   2
   8  -5   7 -0.3880 0.92533   6
  -8   5   7 0.58701 0.50805   2
  -8   5   7 -0.5772 1.18627   4
  -8   5   7 0.40694 1.28388   1
  -8   6  -7 0.45066 0.89059   1
   6   8  -7 -0.1426 0.83295   6
   6   8  -7 0.09556 0.86316   4
   8  -6  -7 -0.0160 0.24693   2
   8  -6   7 -0.9025 0.73362   6
  -8   6   7 -0.6123 0.90358   4
  -8   6   7 -0.1133 0.34319   2
   7   8  -7 -0.1122 0.71328   4
  -8   7  -7 -0.0393 0.65671   1
   8  -7  -7 0.10104 0.18587   2
   7   8  -7 -0.7209 0.53610   6
   8  -7   7 0.08374 0.68214   6
  -8   7   7 0.03423 0.24629   2
   9   6  -7 -0.2130 0.60800   6
  -6   9   7 0.07953 0.59626   4
  -5   9  -7 0.31683 0.28071   2
  -5   9  -7 0.20660 0.86409   1
   5  -9  -7 0.09584 0.29198   1
   9   5  -7 0.17367 0.67243   6
  -5   9   7 -2.1310 0.69782   4
  -5   9   7 -0.1105 0.31665   2
  -5   9   7 -0.3351 1.06377   6
   5  -9   7 -0.0508 0.22892   2
  -9  -5   7 -0.4674 0.67426   1
   9   4  -7 -0.7151 0.67921   6
   4  -9  -7 0.17287 0.32056   1
  -4   9  -7 -0.0722 0.32625   2
  -4   9  -7 -0.1010 0.95660   1
   4  -9   7 0.18067 0.28510   2
  -4   9   7 1.74030 1.46336   6
  -9  -4   7 0.12306 0.90318   1
  -4   9   7 -0.2459 1.06127   4
  -3   9  -7 1.45777 1.19356   4
  -3   9  -7 -0.3524 0.35443   2
   3  -9  -7 -0.0249 0.35112   1
   9   3  -7 0.08192 0.87763   6
  -3   9   7 0.93783 1.34048   4
  -9  -3   7 -0.1190 1.12108   1
  -3   9   7 1.15604 1.46194   6
   3  -9   7 -0.5354 0.28009   2
  -2   9  -7 -1.6613 1.04639   4
   2  -9  -7 0.33121 0.46616   1
  -2   9  -7 0.26702 0.39844   2
   9   2  -7 0.03295 0.96336   6
   2  -9   7 0.12223 0.64392   1
  -2   9   7 -1.4137 1.50454   6
  -2   9   7 -1.0243 1.38002   4
  -9  -2   7 0.32594 1.33290   1
   2  -9   7 -0.4094 0.32034   2
  -1   9  -7 -0.6737 0.34247   2
   9   1  -7 0.01648 1.05089   6
  -1   9  -7 0.06432 1.34069   6
  -1   9  -7 0.58831 1.07523   4
   1  -9  -7 -0.1425 0.42779   1
   1  -9   7 0.75613 0.79086   1
   1  -9   7 -0.7281 0.61291   5
  -9  -1   7 -0.1286 1.37362   1
   1  -9   7 0.15150 0.37174   2
  -9  -1   7 0.25473 0.44053   5
  -1   9   7 0.86324 1.97090   6
  -1   9   7 -0.4537 1.55411   4
   0   9  -7 -0.0973 1.23265   6
   0   9  -7 0.45418 0.45721   2
   0  -9  -7 0.16225 0.48723   1
   0   9  -7 -1.2493 1.00667   4
   9   0  -7 -0.2693 0.32808   2
   9   0  -7 -0.9379 1.04682   6
   0  -9   7 -0.0102 0.87347   1
   0   9   7 -0.5245 1.64062   6
  -9   0   7 0.60677 1.63937   1
   0  -9   7 0.21748 0.39189   2
   0  -9   7 0.45035 0.69067   5
   9  -1  -7 -0.9121 0.88728   6
  -1  -9  -7 0.10218 0.49730   1
   1   9  -7 -0.9889 1.02369   4
   9  -1  -7 0.62407 0.41781   2
   1   9  -7 1.22190 1.30330   6
   1   9  -7 -0.1894 0.39364   2
  -9   1   7 0.21859 1.41979   1
  -1  -9   7 -0.0086 0.33727   2
  -9   1   7 0.55425 0.48049   2
  -1  -9   7 -0.2296 0.51862   5
   1   9   7 0.19537 1.71687   6
  -1  -9   7 -0.0437 0.85445   1
   9  -2  -7 -0.0593 0.32805   2
   2   9  -7 0.28008 0.37287   2
   9  -2  -7 0.54477 0.99135   6
   2   9  -7 -0.3851 1.02645   4
   2   9  -7 -0.9038 1.03367   6
  -2  -9   7 -0.0726 0.47178   5
  -9   2   7 0.84033 1.45184   1
  -2  -9   7 0.35414 0.32159   2
  -2  -9   7 -0.2069 0.80124   1
  -9   2   7 0.13259 0.45966   2
  -9   3  -7 0.02672 1.24700   1
   9  -3  -7 -0.5928 0.79914   6
   3   9  -7 0.40654 0.43245   2
   3   9  -7 0.71585 1.08664   4
   3   9  -7 -0.7513 1.01515   6
   9  -3  -7 0.12997 0.29943   2
  -9   3   7 0.70750 0.48355   2
  -9   3   7 -0.0617 1.13996   1
  -3  -9   7 0.14256 0.78003   1
   9  -3   7 -0.6658 0.85191   6
   4   9  -7 -0.0416 0.86009   4
  -9   4  -7 0.12009 0.94443   1
   4   9  -7 -0.9573 0.87493   6
   9  -4  -7 0.01955 0.25455   2
   9  -4  -7 -0.4383 0.74877   6
  -9   4   7 0.15905 0.41988   2
  -4  -9   7 0.34958 0.82642   1
   9  -4   7 -0.5488 0.81366   6
  -9   4   7 0.08882 0.95954   1
   9  -5  -7 0.09733 0.21478   2
  -9   5  -7 -0.2771 0.82510   1
   5   9  -7 -0.1012 0.68091   4
   5   9  -7 -1.1688 0.67718   6
  -5  -9   7 -0.6011 0.60284   1
  -9   5   7 0.50903 0.35988   2
  -9   5   7 0.82570 0.89774   1
   9  -5   7 -0.2628 0.63977   6
   9  -6  -7 -0.1099 0.21087   2
   6   9  -7 -0.3578 0.59426   6
  -9   6  -7 0.47044 0.73417   1
  -6  -9   7 0.20653 0.58353   1
   9  -6   7 0.51484 0.56460   6
  10   4  -7 -0.5522 0.46384   6
   4 -10  -7 0.10136 0.22388   1
   4 -10   7 -0.0457 0.17962   2
  -4  10   7 1.09959 0.99237   6
  -4  10   7 0.25224 0.67598   4
 -10  -4   7 0.35326 0.75704   1
  10   3  -7 -0.5874 0.56581   6
   3 -10  -7 0.06054 0.26419   1
  -3  10  -7 -0.3368 0.23628   2
 -10  -3   7 -0.0139 0.82145   1
  -3  10   7 1.00802 1.10848   6
   3 -10   7 0.22085 0.21890   2
  -3  10   7 0.48478 0.89020   4
   2 -10  -7 -0.0385 0.27574   1
  -2  10  -7 0.72071 0.85192   4
  -2  10  -7 -0.0362 0.28360   2
  10   2  -7 0.24318 0.71819   6
  -2  10   7 0.12256 1.08974   6
  -2  10   7 2.09098 1.19766   4
   2 -10   7 -0.0910 0.25167   2
 -10  -2   7 1.12471 1.12665   1
  -1  10  -7 0.87622 1.18501   6
  10   1  -7 0.48771 0.78957   6
  -1  10  -7 -0.1782 0.29577   2
  -1  10  -7 -0.1198 0.88302   4
   1 -10  -7 0.05111 0.31063   1
 -10  -1   7 1.25551 1.28616   1
   1 -10   7 0.03626 0.46854   1
  -1  10   7 -0.8336 1.06829   4
   1 -10   7 0.02267 0.25189   2
  -1  10   7 0.03152 1.31883   6
   0  10  -7 1.22515 0.93416   4
  10   0  -7 0.83410 0.88752   6
   0  10  -7 -0.2393 1.04552   6
   0 -10  -7 -0.0957 0.30085   1
   0  10  -7 0.08748 0.34609   2
 -10   0   7 0.19182 1.01716   1
   0 -10   7 -0.0525 0.23787   2
   0 -10   7 0.11659 0.57740   1
   0  10   7 0.26527 1.38193   6
   1  10  -7 -0.0532 0.83961   4
  10  -1  -7 0.24003 0.74484   6
   1  10  -7 -0.0310 0.93917   6
  10  -1  -7 -0.0210 0.25609   2
   1  10  -7 -0.5377 0.35098   2
   1  10   7 -0.7770 1.40315   6
  -1 -10   7 -0.3146 0.45254   1
 -10   1   7 -0.3997 0.90171   1
   2  10  -7 0.28286 0.82238   6
  10  -2  -7 -0.5094 0.65171   6
   2  10  -7 0.58316 0.39186   2
  10  -2  -7 -0.0889 0.25057   2
   2  10  -7 -0.1399 0.71292   4
 -10   2   7 -0.5879 0.77402   1
  -2 -10   7 -0.2010 0.52212   1
   3  10  -7 -0.1261 0.76710   6
   3  10  -7 0.37120 0.75155   4
  10  -3  -7 0.10710 0.23000   2
  10  -3  -7 0.19187 0.67011   6
 -10   3   7 -0.3636 0.78706   1
  -3 -10   7 0.53790 0.62807   1
  10  -3   7 -0.5759 0.61354   6
   4  10  -7 0.22854 0.64221   4
   4  10  -7 0.44919 0.68655   6
  -4 -10   7 0.45973 0.55530   1
   0   0  -8 5189.95 445.836   5
  -1   0  -8 -0.3019 0.48877   5
   0  -1  -8 -0.3497 0.48417   5
   1   0  -8 -0.2139 0.54167   5
   0   1  -8 -1.4055 0.40420   5
  -1   1  -8 4706.89 410.724   5
   1  -1  -8 4727.43 410.837   5
  -1  -1  -8 4796.26 410.531   5
   1   1  -8 4903.11 410.875   5
   2   1  -8 0.22555 0.69558   5
   1  -2  -8 -0.1804 0.55581   5
  -1   2  -8 -0.4976 0.52399   5
   2   0  -8 3390.98 310.022   5
   0   2  -8 3455.23 309.876   5
   0  -2  -8 3967.01 309.756   5
   1   2  -8 -0.5671 0.55309   5
   2  -1  -8 -0.8715 0.65505   5
   2  -2  -8 561.483 46.9477   5
   2   2  -8 548.453 46.6516   2
   2  -2  -8 500.400 46.6691   2
  -2  -2   8 534.950 47.5556   4
  -2  -2   8 557.281 49.4142   6
   3   2  -8 2.75340 2.18635   1
   2  -3  -8 3.04128 0.86027   5
   3   2  -8 1.13527 0.60471   2
  -2   3  -8 0.62201 0.71903   2
   3   2  -8 2.98035 2.16355   6
   2  -3  -8 0.96177 0.84078   1
   2  -3  -8 1.28078 0.59863   2
  -2   3  -8 0.31008 2.21713   1
  -3  -2   8 3.78772 3.08020   6
  -3  -2   8 -0.6146 1.39095   4
  -2   3   8 1.21929 3.18971   6
   2  -3   8 0.25541 1.10289   4
  -2   3   8 0.42895 2.63130   4
  -3  -2   8 0.66557 0.78090   2
   2  -3   8 0.52361 1.95791   6
  -3  -2   8 5.62236 3.08178   1
   3   1  -8 1074.48 93.8763   2
   3   1  -8 1256.51 94.3416   5
   1  -3  -8 1132.45 94.0160   5
  -1   3  -8 1091.45 93.8297   2
   3   1  -8 1120.80 95.8855   1
  -1   3  -8 1062.68 94.0630   5
  -3  -1   8 1032.50 96.3177   6
   1  -3   8 1045.77 94.5232   4
  -3  -1   8 1014.99 94.9483   4
   1  -3   8 1041.86 95.5896   6
   3   0  -8 -0.3377 0.53430   2
   3   0  -8 -0.3804 0.67207   5
   0   3  -8 -0.1930 0.57752   5
   0   3  -8 -0.8378 0.49700   2
   0   3  -8 -1.3293 2.28982   1
   0  -3  -8 -0.6861 0.32043   5
   3   0  -8 -1.3254 0.91367   1
  -3   0   8 2.13338 3.23751   6
  -3   0   8 -2.7771 1.89136   4
   0  -3   8 -1.1461 1.13979   4
   0  -3   8 0.43372 2.22646   6
   3  -1  -8 969.203 85.2897   1
   3  -1  -8 1057.98 84.6041   5
   1   3  -8 955.453 87.6531   1
   1   3  -8 990.353 84.1203   2
   3  -1  -8 952.667 84.1256   2
  -1  -3   8 940.225 84.1513   2
  -3   1   8 908.137 85.6480   4
  -1  -3   8 1008.54 84.9469   4
  -1  -3   8 1068.81 86.3988   6
  -3   1   8 901.988 87.1237   6
  -3   2  -8 -0.1946 2.15835   1
   2   3  -8 1.67325 0.77085   5
   3  -2  -8 0.79738 0.86133   1
   2   3  -8 2.02261 0.70426   2
   3  -2  -8 1.18516 0.83553   5
   2   3  -8 2.07375 2.21933   6
   3  -2  -8 1.20780 0.60917   2
   2   3  -8 0.20260 2.32584   1
  -3   2   8 -3.8252 3.03252   6
  -3   2   8 -0.4253 2.43822   4
   3  -2   8 0.46963 2.00398   6
  -2  -3   8 5.81924 3.00542   1
  -2  -3   8 2.89994 2.46217   6
  -2  -3   8 2.27738 0.93123   2
  -3   2   8 1.37615 1.10873   2
  -2  -3   8 0.36868 1.32253   4
   3  -3  -8 1021.48 89.6679   5
   3   3  -8 1099.60 89.2198   2
  -3   3  -8 1036.11 89.1429   2
   3   3  -8 985.377 92.3035   1
   3  -3  -8 986.533 89.1981   2
   3  -3  -8 1033.83 90.2413   1
   3  -3   8 1055.24 90.9206   6
  -3   3   8 906.752 92.3142   6
  -3  -3   8 1193.39 90.0690   5
  -3   3   8 921.048 90.9178   4
  -3   3   8 942.983 89.2917   2
   3  -3   8 1079.14 89.9546   4
  -3  -3   8 1031.37 89.3071   2
  -3  -3   8 1113.55 90.1248   4
  -3  -3   8 1112.97 91.2480   6
   3  -4  -8 -0.0061 0.64129   5
   3  -4  -8 0.14061 0.63321   1
  -3   4  -8 0.00513 1.64052   1
   4   3  -8 4.10913 2.21961   6
   3  -4  -8 1.30585 0.54233   2
  -3   4  -8 0.14668 0.62616   2
   4   3  -8 -0.3463 0.42255   2
  -3   4   8 0.16797 3.05062   6
   3  -4   8 -0.1304 1.42234   6
  -4  -3   8 0.62860 1.24769   4
  -4  -3   8 -0.2064 0.73550   5
  -4  -3   8 0.42996 0.65518   2
   3  -4   8 -0.0280 0.97303   4
  -3   4   8 1.44618 2.60675   4
  -4  -3   8 1.08772 1.96124   1
   2  -4  -8 816.249 76.0166   2
   4   2  -8 938.409 78.8372   1
  -2   4  -8 944.623 76.1452   2
   2  -4  -8 924.461 76.4592   5
   4   2  -8 903.530 76.1311   2
   2  -4  -8 853.056 77.0860   1
   2  -4   8 824.474 76.1519   2
   2  -4   8 916.064 76.9086   4
  -2   4   8 773.456 77.8028   4
   2  -4   8 931.773 77.9673   6
  -4  -2   8 876.350 76.2212   2
  -2   4   8 814.029 79.2078   6
  -4  -2   8 879.049 78.1459   6
  -4  -2   8 954.256 77.1567   4
   4   1  -8 0.26774 0.54683   2
   4   1  -8 0.98222 1.82620   6
   1  -4  -8 0.19502 0.32480   3
   1  -4  -8 0.02186 0.42290   5
  -1   4  -8 -0.0014 0.54432   2
   1  -4  -8 0.62215 0.72610   1
  -1   4  -8 -0.2402 1.88968   4
  -1   4  -8 0.18742 1.98184   1
   4   1  -8 -0.1418 1.10665   1
  -4  -1   8 -0.2703 1.66798   4
  -4  -1   8 0.22171 0.64404   2
  -1   4   8 1.78138 2.65296   4
  -1   4   8 0.09478 3.07255   6
   1  -4   8 1.47992 1.29325   4
  -4  -1   8 -0.9698 2.62858   6
   1  -4   8 1.05926 0.84147   2
   1  -4   8 -1.5265 1.55629   6
  -4  -1   8 0.24763 1.97027   1
   0   4  -8 868.621 72.0886   5
   4   0  -8 855.166 73.3361   1
   0  -4  -8 805.420 71.5985   5
   0  -4  -8 883.101 71.6062   5
   4   0  -8 883.940 72.3110   5
   0   4  -8 872.075 71.8495   2
   0  -4  -8 756.015 72.8125   1
   4   0  -8 784.476 71.8270   2
  -4   0   8 826.258 73.1597   4
   0  -4   8 774.602 71.8662   2
  -4   0   8 786.593 74.4145   6
   0  -4   8 885.011 73.7832   6
   0  -4   8 857.876 72.5769   4
   4  -1  -8 -0.0655 0.42990   2
   4  -1  -8 -0.5322 1.50402   6
   1   4  -8 2.21244 2.08275   6
   1   4  -8 0.23346 0.50388   5
   4  -1  -8 0.90360 0.83396   5
   4  -1  -8 0.25124 0.81944   1
   1   4  -8 0.31287 0.51907   2
   1   4  -8 0.25681 2.15302   1
  -1  -4   8 0.63080 1.20466   4
  -1  -4   8 -0.4520 1.74631   1
  -1  -4   8 -0.1186 0.61913   2
  -4   1   8 0.24564 2.77977   6
  -4   1   8 0.98886 0.85845   2
  -4   1   8 0.51710 1.83466   1
  -4   1   8 0.28564 1.85553   4
  -1  -4   8 0.30560 1.85694   6
   4  -2  -8 921.152 78.8594   5
   4  -2  -8 893.830 79.3486   1
   2   4  -8 942.660 78.3230   2
   4  -2  -8 852.604 78.3292   2
  -2  -4   8 890.890 78.3705   2
  -2  -4   8 974.602 79.1694   4
  -4   2   8 908.194 78.4890   2
  -4   2   8 887.794 80.0929   4
   4  -2   8 958.519 79.9217   6
  -4   2   8 839.304 81.4613   6
  -2  -4   8 916.278 80.1355   6
  -2  -4   8 917.063 78.9893   5
   4  -3  -8 -0.1604 0.61485   1
   3   4  -8 -0.4941 1.96755   1
   3   4  -8 -0.2528 1.87574   6
   4  -3  -8 -0.2962 0.46679   2
   4  -3  -8 1.03831 0.81111   5
  -4   3  -8 0.92990 1.86905   1
   3   4  -8 0.20184 0.47983   2
  -4   3   8 -0.0491 2.15604   4
  -3  -4   8 -0.4673 1.14589   4
  -3  -4   8 0.03477 0.67636   5
  -4   3   8 -1.0250 3.06404   6
  -4   3   8 -0.2421 0.74116   2
   4  -3   8 1.12854 1.66271   6
  -3  -4   8 0.58394 0.70453   2
   4  -3   8 0.89214 1.13336   4
  -3  -4   8 -0.6318 1.96113   6
  -3  -4   8 1.03662 1.93944   1
  -4   4  -8 1215.76 108.115   2
   4  -4  -8 1287.48 109.293   1
   4  -4  -8 1259.31 108.184   2
   4   4  -8 1330.88 108.173   2
   4  -4  -8 1199.53 108.797   5
  -4  -4   8 1310.94 108.255   2
  -4   4   8 1164.80 110.088   4
  -4  -4   8 1394.82 108.999   5
  -4   4   8 1225.88 108.320   2
  -4  -4   8 1239.64 108.890   4
   4  -4   8 1316.73 110.079   6
  -4   4   8 1141.14 111.442   6
   4  -4   8 1220.30 109.035   4
   5   4  -8 -0.4218 1.58918   6
  -4   5  -8 0.05653 1.42181   1
   4  -5  -8 0.15950 0.58954   1
   4  -5  -8 0.25350 0.49200   2
  -4   5  -8 -0.3859 0.54338   2
   4  -5  -8 0.41989 0.65791   5
   5   4  -8 -0.1109 0.42538   2
   4  -5   8 0.43298 1.63828   6
  -5  -4   8 0.58202 1.81944   1
   4  -5   8 1.23707 1.23978   4
  -5  -4   8 0.09741 0.57298   2
  -4   5   8 -0.7030 2.12723   4
   4  -5   8 0.28652 1.63071   6
  -4   5   8 1.69029 3.09811   6
  -5  -4   8 -0.3009 0.59692   5
  -4   5   8 1.79738 0.94359   2
   5   3  -8 846.307 69.4503   2
  -3   5  -8 841.098 69.4973   2
   3  -5  -8 792.521 69.3596   2
   3  -5  -8 763.405 69.7747   5
   3  -5  -8 786.895 70.4191   1
   3  -5   8 821.182 71.1948   6
  -3   5   8 776.407 71.3848   4
  -5  -3   8 787.476 70.0665   4
   3  -5   8 759.282 69.5014   2
  -5  -3   8 908.609 70.1495   5
  -5  -3   8 843.444 69.5381   2
  -3   5   8 710.556 72.3806   6
   3  -5   8 812.235 70.2632   4
   2  -5  -8 0.62517 0.50585   2
   5   2  -8 0.84121 0.56562   2
  -2   5  -8 1.99548 1.94863   4
   5   2  -8 1.90418 1.72668   6
   2  -5  -8 0.63486 0.53758   5
  -2   5  -8 -0.8293 1.41702   1
   2  -5  -8 1.18754 0.86359   1
  -2   5  -8 1.22038 0.64459   2
   2  -5   8 0.39673 0.60293   2
  -5  -2   8 -0.1677 1.23570   4
  -2   5   8 0.14892 2.66297   6
  -2   5   8 -0.8516 2.23083   4
  -5  -2   8 2.63835 2.43797   1
   2  -5   8 0.96436 1.03078   4
   2  -5   8 -0.3244 1.48678   6
  -5  -2   8 0.83537 0.68877   2
   1  -5  -8 1292.64 102.766   5
   5   1  -8 1177.89 102.673   2
   1  -5  -8 1162.29 103.679   1
   5   1  -8 1289.30 104.833   1
  -1   5  -8 1191.38 102.618   2
  -1   5   8 1112.52 105.685   6
   1  -5   8 1184.32 103.452   4
   1  -5   8 1283.05 104.589   6
  -5  -1   8 1187.66 103.712   4
  -5  -1   8 1167.34 104.795   6
  -5  -1   8 1226.05 102.762   2
  -1   5   8 1048.53 104.386   4
   1  -5   8 1132.68 102.647   2
   0   5  -8 -1.9134 1.65580   6
   0   5  -8 0.57650 1.96740   1
   0  -5  -8 0.05628 0.66551   1
   5   0  -8 0.73561 1.76799   6
   5   0  -8 -0.5035 0.41562   2
   0   5  -8 0.39033 0.59812   5
   5   0  -8 0.02758 1.03325   1
   0   5  -8 0.23039 0.54018   2
   0  -5   8 -0.2833 0.58647   2
  -5   0   8 -0.0602 0.82534   2
  -5   0   8 0.24431 1.92462   1
   0  -5   8 0.62265 2.02553   6
   0  -5   8 -0.1012 1.15951   4
  -5   0   8 0.18253 1.49009   4
  -5   0   8 2.11960 2.81583   6
   5  -1  -8 1250.14 104.924   1
   5  -1  -8 1183.52 103.613   2
   1   5  -8 1245.97 103.612   2
  -5   1   8 1212.09 103.777   2
  -1  -5   8 1199.99 103.622   2
  -1  -5   8 1122.40 104.308   5
  -1  -5   8 1226.48 105.385   6
  -5   1   8 1143.56 106.388   6
  -5   1   8 1181.55 105.099   4
  -1  -5   8 1256.01 104.435   4
   2   5  -8 3.31825 2.27992   6
   5  -2  -8 1.69045 1.58906   6
   5  -2  -8 0.98355 0.64342   2
   5  -2  -8 -0.7661 0.74752   5
  -5   2  -8 0.03369 1.54947   1
   2   5  -8 0.57078 0.54278   2
   5  -2  -8 -0.0276 0.63559   1
   2   5  -8 -0.7649 1.95532   1
  -2  -5   8 1.08380 0.74935   2
  -2  -5   8 3.54993 1.29023   4
  -5   2   8 1.17293 3.02350   6
   5  -2   8 -0.8273 1.54964   6
  -2  -5   8 0.04481 1.87826   1
  -5   2   8 -2.3359 1.69277   4
  -2  -5   8 0.39861 0.88813   5
  -5   2   8 0.33261 0.84206   2
  -2  -5   8 0.69300 1.87201   6
  -5   2   8 3.79124 2.81815   1
   5  -3  -8 817.067 71.4173   1
   5  -3  -8 842.564 70.4839   2
   5  -3  -8 806.105 70.9978   5
   3   5  -8 872.108 70.4585   2
   5  -3   8 829.333 72.0757   6
  -3  -5   8 878.110 70.5501   2
   5  -3   8 832.937 72.0379   6
  -5   3   8 764.677 72.1177   4
  -3  -5   8 825.016 71.0597   4
  -5   3   8 808.456 70.6061   2
  -5   3   8 755.901 73.4627   6
   5  -3   8 718.776 71.0226   4
  -3  -5   8 834.176 71.0391   5
   4   5  -8 -0.4228 0.45822   2
   5  -4  -8 0.13281 0.52101   2
  -5   4  -8 -0.1804 1.40059   1
   5  -4  -8 0.09639 0.60680   1
   4   5  -8 1.57551 1.86769   6
   5  -4  -8 0.48445 0.77869   5
  -4  -5   8 0.53368 0.77783   5
  -4  -5   8 -0.2459 1.64363   1
  -5   4   8 1.38892 3.24411   6
   5  -4   8 0.31539 1.11285   4
  -5   4   8 -0.7096 0.71096   2
  -5   4   8 -1.7692 1.98126   4
   5  -4   8 -0.6899 1.51965   6
  -4  -5   8 0.21410 0.55179   2
   5  -5  -8 500.850 42.2326   1
   5  -5  -8 509.190 41.3506   2
  -5   5  -8 424.167 41.1927   2
   5   5  -8 495.593 41.3394   2
   5  -5  -8 477.510 41.7772   5
  -5   5   8 456.319 42.9204   4
  -5   5   8 451.172 44.1684   6
  -5  -5   8 479.574 41.6939   5
   5  -5   8 460.859 42.8563   6
  -5   5   8 498.697 41.5308   2
  -5  -5   8 482.822 41.3465   2
   5  -6  -8 0.25814 0.57248   1
   5  -6  -8 0.66014 0.46122   2
  -5   6  -8 -0.0245 1.22057   1
  -5   6  -8 1.18879 0.56895   2
   5  -6  -8 0.84246 0.68332   5
   6   5  -8 2.73784 1.57291   6
   5  -6   8 1.55687 0.61017   2
  -5   6   8 0.35801 1.85154   4
  -5   6   8 -2.0037 2.09991   6
  -5   6   8 0.00753 0.62526   2
   5  -6   8 0.51295 1.42274   6
  -6  -5   8 -0.0096 1.34553   1
  -6  -5   8 0.17010 0.47137   2
  -6  -5   8 0.39438 0.60484   5
   6   4  -8 136.388 12.2811   2
   4  -6  -8 135.576 12.5224   5
  -4   6  -8 138.257 12.3512   2
   4  -6  -8 140.146 13.0381   1
   4  -6  -8 138.931 12.2406   2
  -4   6   8 151.553 12.5884   2
   4  -6   8 138.564 12.4177   2
  -6  -4   8 136.942 12.3234   2
  -6  -4   8 146.327 12.5941   5
   4  -6   8 140.732 13.8365   6
  -4   6   8 129.966 13.9025   4
  -4   6   8 127.468 14.9649   6
   3  -6  -8 0.16321 0.60591   1
  -3   6  -8 -0.4124 0.58000   2
   3  -6  -8 0.66822 0.58020   5
   6   3  -8 -0.3832 1.40712   6
   3  -6  -8 0.09194 0.43075   2
   6   3  -8 -0.4070 0.45422   2
  -3   6  -8 1.30999 1.76932   1
  -3   6   8 1.60968 2.73005   6
  -6  -3   8 -0.2869 0.64477   5
  -6  -3   8 0.34255 0.61265   2
   3  -6   8 -0.0797 0.59369   2
  -3   6   8 -1.1478 2.19196   4
   3  -6   8 1.38772 1.22036   4
  -6  -3   8 2.15202 2.30219   1
   3  -6   8 0.07776 1.48523   6
   2  -6  -8 610.693 50.1596   5
   2  -6  -8 569.690 50.9922   1
  -2   6  -8 579.700 50.0825   2
   6   2  -8 593.430 50.0437   2
  -2   6   8 558.372 51.9344   4
   2  -6   8 553.948 50.1110   2
  -6  -2   8 603.495 50.1300   2
   2  -6   8 580.168 50.7749   4
   2  -6   8 583.696 51.6488   6
  -2   6   8 533.163 52.9517   6
   2  -6   8 579.598 51.6805   6
  -1   6  -8 1.08835 0.60339   2
  -1   6  -8 -0.0976 2.04066   6
   6   1  -8 0.92294 1.57722   6
  -1   6  -8 2.14704 1.79271   4
   1  -6  -8 0.39315 0.69137   1
  -1   6  -8 0.63281 1.72827   1
   1  -6  -8 0.24790 0.21459   5
   6   1  -8 0.13946 0.48288   2
  -6  -1   8 0.60242 1.99943   1
  -1   6   8 1.84212 2.72633   4
   1  -6   8 0.62195 1.64314   6
   1  -6   8 0.27462 1.48477   1
  -6  -1   8 0.65884 0.68882   2
  -1   6   8 2.77400 3.05559   6
   1  -6   8 0.37415 0.61843   2
  -6  -1   8 2.39550 1.58965   4
   1  -6   8 -0.1671 1.00754   4
   0  -6  -8 966.864 90.1116   1
   6   0  -8 1026.07 89.2365   2
   0   6  -8 1051.99 89.2120   2
   0   6   8 1004.26 92.1328   6
   0  -6   8 1067.12 89.2869   2
   0  -6   8 1057.39 90.9239   6
  -6   0   8 1061.84 90.3186   4
   0  -6   8 1065.45 90.0340   4
   1   6  -8 0.96540 1.89194   1
   6  -1  -8 0.60864 1.69798   6
   1   6  -8 3.36909 2.00446   6
   1   6  -8 0.36667 0.51989   2
   6  -1  -8 0.02174 0.49212   2
   6  -1  -8 0.42352 0.92310   1
  -6   1   8 0.22741 0.79002   2
  -1  -6   8 -0.5846 0.72299   5
  -1  -6   8 1.15053 0.68276   2
  -6   1   8 0.11921 1.53638   4
  -1  -6   8 1.08140 1.17145   4
  -6   1   8 -1.1352 2.67327   6
  -6   1   8 2.25810 2.39076   1
  -1  -6   8 0.18511 1.75075   6
   2   6  -8 611.876 51.3076   2
   6  -2  -8 602.404 52.3346   1
   6  -2  -8 573.012 51.2887   2
  -2  -6   8 591.603 51.8475   4
  -6   2   8 609.323 51.4669   2
   6  -2   8 572.205 53.0318   6
  -6   2   8 545.616 53.7663   6
  -6   2   8 580.502 52.6417   4
  -2  -6   8 630.367 51.3684   2
  -6   3  -8 -0.4571 1.44190   1
   6  -3  -8 0.66340 0.58646   2
   6  -3  -8 1.70194 1.67704   6
   3   6  -8 -1.2624 1.68861   6
   6  -3  -8 -0.0160 0.68384   1
   3   6  -8 0.00363 0.46821   2
  -6   3   8 5.32025 3.44029   6
  -6   3   8 2.26294 2.49096   1
   6  -3   8 1.16911 1.69348   6
  -6   3   8 2.80337 1.99428   4
  -3  -6   8 0.30760 0.61719   2
  -6   3   8 -0.4582 0.79661   2
  -3  -6   8 -1.1791 0.58095   5
   6  -4  -8 148.440 13.6157   1
   6  -4  -8 144.961 12.8337   2
   4   6  -8 152.786 12.8462   2
   6  -4  -8 139.214 13.1913   5
   6  -4   8 135.381 14.0701   6
  -6   4   8 149.538 14.3822   4
  -6   4   8 151.775 13.0159   2
  -6   4   8 145.037 15.6413   6
  -4  -6   8 149.341 12.8332   2
  -4  -6   8 129.312 13.0347   5
   5   6  -8 -0.0146 1.36613   6
   6  -5  -8 3.20312 0.96323   5
   6  -5  -8 0.28960 0.49838   2
   6  -5  -8 0.73158 0.65885   1
  -6   5  -8 0.17025 1.26396   1
   5   6  -8 0.83997 0.46291   2
  -5  -6   8 0.72826 0.58292   5
   6  -5   8 -0.4653 1.46591   6
  -6   5   8 -0.5360 1.73845   4
  -5  -6   8 1.44166 1.73612   1
  -6   5   8 1.53032 0.70592   2
  -5  -6   8 0.31954 0.46226   2
  -6   5   8 0.54417 2.49426   6
   6  -6  -8 498.676 39.4497   2
   6  -6  -8 430.095 39.7332   5
   6  -6  -8 504.449 40.1550   1
  -6   6   8 442.700 40.5547   4
  -6   6   8 441.933 41.3862   6
  -6   6   8 488.472 39.5775   2
  -6  -6   8 384.492 39.4927   5
   6  -6   8 458.980 40.6943   6
   6  -7  -8 -0.1586 0.33789   1
  -6   7  -8 0.42043 0.97912   1
   6  -7  -8 -0.0665 0.29353   2
   7   6  -8 -0.7286 0.84381   6
   6  -7   8 0.68770 1.11950   6
   6  -7   8 0.23493 0.37208   2
  -7  -6   8 0.04792 1.07861   1
  -6   7   8 0.36018 1.54425   6
  -6   7   8 -0.4601 0.40852   2
  -6   7   8 1.70188 1.25256   4
  -5   7  -8 198.963 17.7542   2
   5  -7  -8 223.765 17.7435   2
   5  -7  -8 217.717 18.4000   1
   5  -7  -8 221.065 17.9850   5
   5  -7   8 203.348 18.8861   6
   5  -7   8 206.517 17.8473   2
  -5   7   8 185.029 19.5702   6
  -7  -5   8 176.073 17.6980   5
  -5   7   8 192.493 18.8829   4
  -5   7   8 208.270 17.9233   2
   4  -7  -8 -0.1683 0.35985   2
  -4   7  -8 -0.5881 0.46484   2
   4  -7  -8 -0.0472 0.40840   1
  -4   7  -8 0.71967 1.37768   1
   7   4  -8 0.98026 1.30528   6
   4  -7  -8 0.43711 0.50922   5
  -4   7   8 -0.0156 2.14551   6
  -7  -4   8 1.09065 1.82581   1
  -4   7   8 -0.3886 1.61280   4
   4  -7   8 -0.8081 1.29900   6
   4  -7   8 0.10384 0.47300   2
  -4   7   8 0.92809 0.69516   2
  -7  -4   8 0.19032 0.54784   5
  -3   7  -8 121.009 12.0132   4
   3  -7  -8 134.750 11.0967   5
   7   3  -8 125.470 11.0392   2
   3  -7  -8 123.297 11.7487   1
  -3   7  -8 126.733 11.1356   2
   3  -7   8 111.672 12.2260   6
  -7  -3   8 138.327 11.3543   5
  -3   7   8 109.041 13.4572   6
  -7  -3   8 128.733 11.0852   2
   3  -7   8 118.663 11.1371   2
  -3   7   8 110.473 12.5789   4
   2  -7  -8 0.50776 0.30730   5
  -2   7  -8 0.94758 0.59424   2
   7   2  -8 0.21037 0.42904   2
   2  -7  -8 0.11190 0.51775   1
  -2   7  -8 0.90798 1.50598   4
  -2   7  -8 0.61040 1.41907   1
   7   2  -8 0.60620 1.47231   6
   2  -7   8 0.09639 1.02777   4
  -2   7   8 1.44223 2.52793   4
  -7  -2   8 -0.1340 1.76066   1
  -2   7   8 -3.5641 2.16342   6
   2  -7   8 0.16019 1.61126   6
  -7  -2   8 -0.0898 0.53364   2
  -7  -2   8 0.32043 0.71784   5
   2  -7   8 -0.2244 0.52459   2
   7   1  -8 483.839 40.1619   2
   1  -7  -8 458.342 40.9838   1
  -1   7  -8 457.778 40.1841   2
  -1   7   8 466.158 43.0222   6
   1  -7   8 455.947 42.1321   1
   1  -7   8 468.520 40.2153   2
  -1   7   8 446.797 41.8299   4
   1  -7   8 459.286 40.7799   4
   1  -7   8 450.154 41.5203   6
  -7  -1   8 481.913 40.2157   2
   7   0  -8 0.01760 0.49055   2
   0   7  -8 0.14306 0.50838   2
   0   7  -8 0.96196 1.81088   6
   0  -7  -8 0.01467 0.59542   1
   0   7  -8 0.86857 1.68117   4
   0   7  -8 0.31408 1.63779   1
   7   0  -8 0.35088 1.49621   6
   0  -7   8 0.74601 0.63323   2
   0  -7   8 -1.5221 1.51205   6
   0  -7   8 0.34180 1.03818   4
  -7   0   8 1.19647 0.76400   2
   0  -7   8 -0.3589 0.75397   5
  -7   0   8 -0.3848 1.80405   1
   0  -7   8 -0.0661 1.27926   1
   0   7   8 0.14006 2.59143   6
   1   7  -8 1044.97 96.5969   6
   7  -1  -8 1099.59 96.4896   6
   1   7  -8 1183.62 96.4030   4
  -7   2  -8 0.15343 1.89779   1
   2   7  -8 0.37562 0.55222   2
   2   7  -8 0.50511 1.56766   4
   2   7  -8 0.76762 1.66035   6
   7  -2  -8 -0.6702 0.38581   2
   7  -2  -8 -0.4736 1.39762   6
  -7   2   8 1.50625 2.43604   1
  -2  -7   8 1.11650 0.74335   5
  -7   2   8 -1.4596 1.43084   4
  -2  -7   8 0.32645 0.57265   2
   7  -3  -8 134.229 11.5622   2
   3   7  -8 135.573 11.5894   2
  -7   3   8 130.938 12.7260   4
  -3  -7   8 106.777 11.7124   5
  -3  -7   8 137.515 11.5411   2
   7  -3   8 115.880 12.5739   6
  -7   3   8 148.052 11.7810   2
   4   7  -8 2.17451 1.73126   6
   7  -4  -8 -0.4463 0.37885   2
  -7   4  -8 -0.9399 0.99935   1
   7  -4  -8 0.56070 1.30227   6
   7  -4  -8 0.26778 0.62685   1
   4   7  -8 1.75496 0.59751   2
  -7   4   8 0.70614 3.09754   6
  -4  -7   8 0.49017 0.43957   2
  -4  -7   8 0.54052 0.55319   5
  -7   4   8 1.11246 1.83510   1
  -7   4   8 0.31946 0.68445   2
  -7   4   8 -0.4662 1.49277   4
   7  -4   8 -0.6799 1.20698   6
   7  -5  -8 244.902 20.0029   1
   7  -5  -8 222.956 19.3025   2
  -7   5   8 223.683 20.2633   4
   7  -5   8 199.287 20.2807   6
  -7   5   8 220.834 19.4168   2
  -7   5   8 202.914 20.8357   6
  -7   6  -8 -0.5713 0.83275   1
   7  -6  -8 0.09396 0.42653   1
   7  -6  -8 0.03481 0.30877   2
   6   7  -8 -0.1070 1.08458   6
  -7   6   8 0.23147 1.03912   4
  -7   6   8 0.02588 2.10404   6
   7  -6   8 0.06606 1.06487   6
  -7   6   8 -0.2364 0.43854   2
   7  -7  -8 155.447 12.6670   2
   7  -7   8 135.939 13.3259   6
  -7   7   8 147.051 12.7440   2
  -7   7   8 139.887 13.1789   4
   8   7  -8 0.65527 0.84756   6
  -7   8  -8 0.10294 0.90009   1
   6  -8  -8 74.7539 6.26610   1
   6  -8   8 62.4236 5.92136   2
  -6   8   8 63.7387 6.82952   6
  -6   8   8 67.4781 5.97514   2
   6  -8   8 62.6135 6.46197   6
  -6   8   8 64.4266 6.47727   4
  -5   8  -8 0.10276 0.31229   2
   5  -8  -8 0.24959 0.35437   1
   8   5  -8 -1.0661 0.72015   6
  -5   8  -8 0.69862 1.05255   1
   5  -8   8 -0.1083 1.02226   6
  -8  -5   8 0.46513 1.02637   1
  -5   8   8 -0.3542 1.45132   6
  -5   8   8 0.52831 0.45504   2
   5  -8   8 -0.1362 0.28827   2
  -5   8   8 0.91017 1.12737   4
   4  -8  -8 163.649 13.6321   1
  -4   8  -8 148.997 13.0960   2
  -4   8   8 129.392 14.6857   6
   4  -8   8 145.327 13.1256   2
  -4   8   8 149.375 14.1937   4
   4  -8   8 146.404 13.9482   6
  -3   8  -8 0.18235 0.43092   2
  -3   8  -8 0.84430 1.22009   1
   3  -8  -8 -0.1132 0.40822   1
  -3   8  -8 0.68836 1.39724   4
   8   3  -8 0.32472 1.24707   6
  -8  -3   8 0.39212 0.52000   5
   3  -8   8 -0.0615 1.23394   6
   3  -8   8 0.90985 0.47381   2
  -3   8   8 -0.5908 1.61824   4
  -3   8   8 0.36714 1.81613   6
  -8  -3   8 0.16035 1.54855   1
  -2   8  -8 185.700 15.3162   4
   2  -8  -8 156.219 14.9472   1
  -2   8  -8 166.755 14.4174   2
   8   2  -8 158.956 14.3087   2
   2  -8   8 141.917 15.2085   6
  -8  -2   8 172.061 14.3374   2
  -2   8   8 148.456 16.5557   6
   2  -8   8 156.259 14.3851   2
  -2   8   8 159.139 15.7688   4
  -8  -2   8 191.486 14.6178   5
  -1   8  -8 0.91741 0.55689   2
   8   1  -8 0.34267 1.28440   6
   1  -8  -8 -0.4278 0.39326   1
  -1   8  -8 0.12031 1.67208   1
   8   1  -8 0.30711 0.38475   2
  -1   8  -8 -1.1395 1.06215   4
  -1   8  -8 -1.9263 1.35207   6
   1  -8   8 0.14393 0.88453   1
  -8  -1   8 0.19988 1.65792   1
  -1   8   8 -0.4180 2.02857   6
  -8  -1   8 -0.4656 0.51925   2
   1  -8   8 0.72054 0.52959   2
  -1   8   8 0.39565 1.98089   4
   0  -8  -8 186.496 16.8823   1
   0   8  -8 189.112 16.3084   2
   8   0  -8 193.297 16.2620   2
   0  -8   8 165.265 17.8529   1
   0   8   8 162.702 18.2085   6
   0  -8   8 186.528 16.2837   2
  -8   0   8 201.195 16.3242   2
   1   8  -8 -0.6875 1.25601   4
   1   8  -8 0.70163 1.42180   6
   8  -1  -8 -0.3532 0.43973   2
   1   8  -8 0.28649 0.48719   2
   8  -1  -8 1.17338 1.38874   6
  -1  -8   8 -0.4548 0.62526   5
  -1  -8   8 0.24734 1.06325   1
  -1  -8   8 -0.0428 0.46991   2
  -8   1   8 0.43055 0.58614   2
  -8   1   8 3.49684 2.38945   1
   2   8  -8 347.361 34.3561   6
   2   8  -8 422.862 34.2523   4
   8  -2  -8 390.120 34.2260   6
   3   8  -8 -0.3724 1.15458   6
   8  -3  -8 -0.2023 0.37040   2
   3   8  -8 0.81463 1.18268   4
  -8   3  -8 -0.4053 1.17675   1
   8  -3  -8 0.22801 1.10407   6
   3   8  -8 -0.1570 0.42924   2
  -3  -8   8 -0.6343 0.44969   5
  -8   3   8 -0.5113 0.57010   2
   8  -3   8 1.48930 1.23843   6
  -3  -8   8 0.25252 0.38008   2
  -8   3   8 0.89049 1.61474   1
   4   8  -8 170.950 15.1375   2
   8  -4  -8 176.681 15.1076   2
   8  -4   8 160.507 15.9154   6
  -8   4   8 187.136 15.8056   4
   5   8  -8 1.03855 0.99270   6
  -8   5  -8 -0.0594 0.91289   1
   5   8  -8 -0.1969 0.92190   4
   8  -5  -8 -0.0381 0.28124   2
   8  -5   8 -0.2025 0.92109   6
  -8   5   8 0.07345 0.42957   2
  -8   5   8 -0.3438 0.91629   4
   8  -6  -8 77.6223 6.45794   2
   8  -6   8 70.1266 7.07790   6
  -8   6   8 65.3770 6.78955   4
  -8   6   8 76.1584 6.52863   2
  -8   7  -8 0.72679 0.69562   1
   7   8  -8 0.90997 0.88037   6
   8  -7   8 -0.1497 0.84897   6
   5  -9  -8 93.4902 7.58364   1
   5  -9   8 82.2035 7.29073   2
  -5   9   8 74.4033 7.72310   4
  -5   9   8 70.8637 8.04285   6
   4  -9  -8 0.14781 0.30823   1
  -4   9  -8 -0.3325 0.88384   1
   9   4  -8 0.11955 0.76560   6
  -4   9  -8 0.20686 0.29998   2
   4  -9   8 0.19759 0.25697   2
  -4   9   8 0.58803 0.99754   4
  -9  -4   8 -0.2986 0.77983   1
  -4   9   8 -0.2588 1.24057   6
  -3   9  -8 159.731 14.0986   2
   3  -9  -8 169.717 14.5176   1
  -3   9   8 145.225 15.4539   6
  -3   9   8 160.029 14.9982   4
   3  -9   8 163.428 14.0991   2
  -2   9  -8 0.33936 0.38193   2
   2  -9  -8 0.10323 0.35182   1
   9   2  -8 -0.3755 0.84830   6
  -2   9  -8 -1.3658 0.96918   4
  -2   9   8 0.00342 1.38479   4
  -2   9   8 0.86163 1.75905   6
   2  -9   8 0.07709 0.33188   2
  -9  -2   8 0.82477 1.32384   1
  -1   9  -8 133.690 11.6295   2
   9   1  -8 130.210 11.5380   2
   1  -9  -8 131.849 12.0573   1
  -1   9  -8 126.743 12.7093   6
  -1   9  -8 140.553 12.3209   4
  -1   9   8 118.659 12.4997   4
   1  -9   8 127.276 11.5671   2
   1  -9   8 144.553 12.5303   1
  -1   9   8 122.936 13.3405   6
   0   9  -8 0.16519 0.38609   2
   0  -9  -8 -0.0486 0.37781   1
   0   9  -8 -0.5198 1.24123   6
   9   0  -8 0.07748 1.01115   6
   9   0  -8 -0.2660 0.30796   2
   0   9  -8 0.51133 1.12907   4
   0  -9   8 0.14516 0.76507   1
   0  -9   8 -0.0707 0.38913   2
  -9   0   8 -0.2517 1.18458   1
   0   9   8 0.22893 1.57502   6
   9  -1  -8 131.181 11.8235   2
   1   9  -8 135.721 11.8866   2
  -1  -9   8 124.913 11.7885   2
  -9   1   8 153.386 11.8593   2
  -1  -9   8 129.612 13.1288   1
   2   9  -8 -0.2244 0.32667   2
   2   9  -8 -0.2372 0.99756   4
   9  -2  -8 0.34748 0.35561   2
   9  -2  -8 -0.0622 0.93523   6
   2   9  -8 -0.4573 1.01757   6
  -9   2   8 0.52326 1.36826   1
  -2  -9   8 -0.1188 0.79574   1
  -2  -9   8 0.11479 0.30404   2
  -9   2   8 0.52704 0.46270   2
   9  -3  -8 180.204 16.0853   2
   3   9  -8 186.345 16.1407   2
  -9   3   8 215.235 16.1570   2
   9  -3   8 157.456 16.5986   6
  -9   4  -8 -0.0863 0.91092   1
   4   9  -8 -0.7618 0.74542   4
   9  -4  -8 0.54151 0.28165   2
   4   9  -8 0.44054 0.88819   6
  -4  -9   8 -0.2695 0.60644   1
  -9   4   8 -0.1943 0.31984   2
  -9   4   8 -0.2149 0.92754   1
   9  -4   8 -0.1659 0.84101   6
   9  -5  -8 96.1008 8.21103   2
   9  -5   8 91.4220 8.68085   6
   3 -10  -8 0.04911 0.24178   1
  10   3  -8 -0.2307 0.55929   6
  -3  10  -8 0.02504 0.23990   2
   3 -10   8 -0.1169 0.17225   2
  -3  10   8 1.13895 1.03597   6
  -3  10   8 -1.0151 0.76866   4
 -10  -3   8 0.05405 0.74800   1
   2 -10  -8 87.4528 7.39355   1
  -2  10  -8 73.7553 7.48158   4
  -2  10  -8 80.8550 7.09479   2
  -2  10   8 74.5422 8.13804   6
  -2  10   8 76.7931 7.68872   4
   2 -10   8 79.9216 7.05622   2
  10   1  -8 0.36256 0.74668   6
   1 -10  -8 0.25973 0.34050   1
  -1  10  -8 -0.9310 0.81474   4
  -1  10  -8 -0.1672 0.25477   2
 -10  -1   8 0.37802 0.97361   1
   1 -10   8 0.60172 0.26715   2
  -1  10   8 1.07026 1.22303   6
   0 -10  -8 148.452 13.0877   1
   0  10  -8 154.811 13.3257   4
  10   0  -8 151.317 12.8438   2
   0  10  -8 146.707 12.8201   2
   0  10  -8 148.640 13.5042   6
   0  10   8 140.120 13.8584   6
   0 -10   8 165.963 13.4648   1
   0 -10   8 125.478 12.7066   2
  10  -1  -8 1.14091 0.80114   6
   1  10  -8 0.13002 0.77296   4
   1  10  -8 0.53404 0.97005   6
   1  10  -8 0.22741 0.32779   2
  10  -1  -8 0.46833 0.25670   2
  -1 -10   8 0.07987 0.49690   1
 -10   1   8 0.46553 1.06145   1
   2  10  -8 86.5803 8.60409   2
  10  -2  -8 92.8718 8.56586   2
   2  10  -8 107.220 9.29585   6
   2  10  -8 118.650 9.17352   4
  -2 -10   8 100.857 9.35969   1
   3  10  -8 -0.0416 0.66441   6
   3  10  -8 -0.2831 0.60147   4
  -3 -10   8 -0.5571 0.43225   1
 -10   3   8 -0.4151 0.71133   1
   0   0  -9 0.27816 0.48276   5
  -1   0  -9 -0.2513 0.38848   5
   0   1  -9 0.09421 0.47708   5
   0  -1  -9 0.26370 0.44878   5
   1   0  -9 0.39990 0.59517   5
  -1  -1  -9 -0.0758 0.28199   5
   1   1  -9 -0.9320 1.38960   1
   1   1  -9 -0.0761 0.51933   5
   1   1  -9 0.42603 0.55047   2
  -1   1  -9 0.80449 0.51270   5
   1  -1  -9 -0.6034 0.41775   5
  -1  -1   9 1.61003 1.72642   4
  -1  -1   9 -0.0403 2.69009   6
   1  -2  -9 0.55739 0.80448   1
   1  -2  -9 0.19934 0.47392   2
   2   1  -9 0.15467 1.40287   1
  -1   2  -9 -0.0925 0.55747   2
  -1   2  -9 1.32339 2.28695   1
   2   1  -9 0.32521 0.49442   2
   1  -2  -9 -0.5651 0.36319   5
  -1   2  -9 0.32054 0.53335   5
   2   1  -9 0.40820 0.64348   5
  -1   2   9 2.55550 3.53898   6
   1  -2   9 -0.5261 1.27130   4
  -2  -1   9 1.36698 0.83184   2
  -2  -1   9 1.14690 2.81896   6
   1  -2   9 0.32819 2.22415   6
  -2  -1   9 0.47368 1.58869   4
   0   2  -9 0.16191 0.55457   2
   2   0  -9 0.12903 0.99746   1
   0   2  -9 1.34757 2.19407   1
   0   2  -9 -0.7413 0.36955   5
   0  -2  -9 0.40126 0.37569   5
   2   0  -9 -0.6834 0.43941   5
   2   0  -9 0.33377 0.57263   2
   0  -2   9 0.91014 2.35063   6
  -2   0   9 1.15473 2.01616   4
   0  -2   9 0.13567 1.23264   4
  -2   0   9 -1.9211 2.49556   6
   1   2  -9 -0.0497 0.54837   2
   1   2  -9 1.25508 1.96743   1
   2  -1  -9 0.66928 0.96812   1
   2  -1  -9 0.64662 0.52104   2
   1   2  -9 0.22740 0.48496   5
   2  -1  -9 0.25953 0.56694   5
  -1  -2   9 -0.6922 0.76093   2
  -2   1   9 -0.0657 2.01318   4
  -1  -2   9 0.00725 1.29618   4
  -2   1   9 1.30662 3.37512   6
  -1  -2   9 2.81680 2.60254   6
   2   2  -9 -0.3766 0.53539   5
   2  -2  -9 -0.2305 0.47876   5
   2   2  -9 -0.3092 1.79682   6
  -2   2  -9 -1.3263 1.78039   1
   2   2  -9 -0.0270 0.46700   2
   2  -2  -9 -0.0889 0.68618   1
   2  -2  -9 -0.1818 0.47455   2
   2   2  -9 0.78728 1.89766   1
  -2   2  -9 -0.6111 0.57058   2
   2  -2   9 1.38511 2.25019   6
  -2  -2   9 -0.3106 1.34198   4
  -2   2   9 1.65197 2.44027   4
  -2  -2   9 -0.7343 1.83789   1
  -2  -2   9 -0.2940 2.56859   6
  -2  -2   9 0.21898 0.75814   2
   2  -2   9 0.55606 1.21388   4
  -2   2   9 -2.3035 2.78537   6
  -2   3  -9 0.96456 0.64160   2
  -2   3  -9 -0.6458 1.89582   1
   3   2  -9 0.43854 0.54131   2
   3   2  -9 -0.8285 1.32946   1
   2  -3  -9 0.19033 0.47784   2
   2  -3  -9 -0.0368 0.48114   5
   2  -3  -9 -0.1707 0.63794   1
   3   2  -9 0.96216 0.67963   5
   3   2  -9 2.39567 1.99198   6
   2  -3   9 -0.3222 1.80137   6
  -3  -2   9 -0.6459 2.28490   6
  -2   3   9 -0.8581 2.89017   6
   2  -3   9 -0.6855 0.93588   4
  -2   3   9 -0.2710 2.29655   4
  -3  -2   9 1.30375 1.97270   1
  -3  -2   9 0.76559 0.72872   2
  -3  -2   9 0.78979 1.45752   4
  -1   3  -9 0.60735 0.55168   5
   1  -3  -9 -0.6242 0.33202   5
   1  -3  -9 0.50012 0.45815   2
   3   1  -9 -0.6349 0.57259   5
   3   1  -9 0.17389 0.51951   2
   3   1  -9 -0.4947 1.69801   6
  -1   3  -9 -0.5380 0.52895   2
  -1   3  -9 0.23372 2.03404   1
   3   1  -9 -0.3903 1.17501   1
   1  -3  -9 -0.0248 0.59690   1
  -1   3   9 -0.8859 2.34807   4
  -3  -1   9 1.48549 2.24079   1
   1  -3   9 -0.6543 1.01269   4
  -1   3   9 -0.6768 3.04572   6
  -3  -1   9 -1.0960 0.69236   2
   1  -3   9 -0.3207 1.82175   6
  -3  -1   9 0.38572 2.34224   6
  -3  -1   9 0.10750 1.59519   4
   0  -3  -9 0.05886 0.69771   1
   0  -3  -9 -0.0770 0.23669   5
   0   3  -9 0.46535 2.33249   1
   3   0  -9 -0.0529 0.95927   1
   0   3  -9 -0.3650 0.44581   2
   3   0  -9 -0.5337 0.40541   2
   3   0  -9 1.32336 1.65394   6
   0   3  -9 -0.2026 0.50843   5
   3   0  -9 -0.2200 0.58029   5
   0  -3   9 -0.4864 2.11463   6
  -3   0   9 -1.8064 2.66352   6
  -3   0   9 0.88610 1.70123   4
   0  -3   9 0.42438 1.18255   4
   0  -3   9 0.61435 0.88369   2
  -3   0   9 -0.4357 0.86333   2
  -3   0   9 -0.1363 1.82882   1
   1   3  -9 0.07358 0.53269   2
   3  -1  -9 0.53582 0.87206   1
  -3   1  -9 0.08854 2.05516   1
   1   3  -9 -0.6091 0.43156   5
   3  -1  -9 -0.1074 0.50483   5
   1   3  -9 0.13360 2.01100   6
   3  -1  -9 0.17535 0.54041   2
   1   3  -9 -1.3767 1.71416   1
  -1  -3   9 0.21416 1.26686   4
  -1  -3   9 -2.5968 1.79533   6
  -3   1   9 0.06684 0.85864   2
  -3   1   9 5.44837 3.57726   6
  -1  -3   9 -0.5124 0.66262   2
  -1  -3   9 -0.0192 2.01954   1
  -3   1   9 0.19488 1.89638   4
   2   3  -9 0.49325 1.75459   6
  -3   2  -9 -1.9488 1.67744   1
   2   3  -9 -0.0797 1.86140   1
   3  -2  -9 0.31429 0.44081   2
   2   3  -9 -0.5962 0.44201   2
   3  -2  -9 0.64745 0.88520   1
   3  -2  -9 0.50866 0.62072   5
   2   3  -9 0.29395 0.58535   5
  -3   2   9 -1.2985 1.95614   4
  -2  -3   9 0.71322 0.81440   2
  -3   2   9 0.68202 2.88838   6
  -3   2   9 0.08292 1.00781   2
   3  -2   9 1.79280 1.86703   6
   3  -2   9 -0.6554 1.13457   4
  -2  -3   9 -0.2850 1.85970   1
  -2  -3   9 1.12626 1.28972   4
  -2  -3   9 1.23822 2.28633   6
   3  -3  -9 -0.1524 0.64582   1
  -3   3  -9 -0.6745 1.52626   1
   3   3  -9 0.10218 1.83066   6
  -3   3  -9 0.06672 0.54168   2
   3   3  -9 0.99814 0.62566   2
   3  -3  -9 -0.0422 0.44737   2
   3   3  -9 -0.9000 1.70791   1
   3  -3  -9 -0.4350 0.52549   5
  -3   3   9 -0.6567 3.14250   6
   3  -3   9 -0.8112 1.01753   4
  -3  -3   9 -0.2696 0.57919   2
  -3   3   9 0.12089 1.95967   4
  -3  -3   9 -0.1191 0.84299   5
  -3  -3   9 -0.3186 1.20076   4
  -3  -3   9 1.27369 2.16968   1
  -3  -3   9 -0.0448 2.10081   6
   3  -3   9 0.03749 1.64746   6
  -3   3   9 -0.8230 0.79284   2
   3  -4  -9 -0.0915 0.52281   5
  -3   4  -9 -1.1609 0.49297   2
   4   3  -9 -0.4610 1.88453   1
   3  -4  -9 0.35971 0.70974   1
   4   3  -9 0.15699 1.71340   6
   3  -4  -9 -0.0921 0.40229   2
  -3   4  -9 0.79863 1.80315   1
   4   3  -9 0.02660 0.46392   2
   3  -4   9 -0.1814 1.47690   6
  -3   4   9 1.27123 3.05417   6
  -4  -3   9 -1.1359 0.71320   5
  -4  -3   9 0.91650 0.70277   2
  -3   4   9 1.01535 2.38320   4
   3  -4   9 -1.4380 1.02352   4
  -4  -3   9 0.50407 1.91343   1
  -4  -3   9 -0.3085 2.07569   6
  -4  -3   9 0.88599 1.21093   4
   2  -4  -9 -0.0209 0.42170   2
   4   2  -9 1.46837 1.94090   6
   2  -4  -9 0.16785 0.64425   1
   2  -4  -9 0.13716 0.46018   5
   4   2  -9 0.05710 0.49447   2
  -2   4  -9 -1.3080 1.69611   1
  -2   4  -9 -0.1522 0.60288   2
   4   2  -9 -0.4660 1.52469   1
   2  -4   9 1.75702 1.00759   2
  -4  -2   9 1.51147 2.12148   6
  -2   4   9 0.14417 2.84726   6
  -4  -2   9 1.52644 1.28359   4
  -2   4   9 0.06050 2.39078   4
   2  -4   9 0.70193 1.07630   4
   2  -4   9 0.92623 1.77971   6
  -4  -2   9 -0.6362 1.81607   1
  -4  -2   9 -0.1948 0.58959   2
   4   1  -9 1.74430 1.73402   6
  -1   4  -9 1.07452 0.71626   2
  -1   4  -9 0.80830 2.07699   1
  -1   4  -9 -0.9217 1.90078   4
   1  -4  -9 0.50957 0.38038   5
   4   1  -9 0.97524 0.59813   2
   1  -4  -9 0.69015 0.73425   1
   4   1  -9 -0.4260 1.19054   1
  -4  -1   9 2.17800 2.20127   1
  -1   4   9 3.21329 3.22850   6
   1  -4   9 0.85253 2.02870   6
   1  -4   9 0.57674 1.13217   4
   1  -4   9 -0.8655 0.65706   2
  -4  -1   9 1.63246 2.71208   6
  -1   4   9 -0.7506 2.31644   4
  -4  -1   9 0.99818 1.67042   4
  -4  -1   9 0.34379 0.67690   2
   0   4  -9 0.30324 0.52972   2
   0   4  -9 0.45263 0.57601   5
   0   4  -9 -1.2398 1.89168   1
   0   4  -9 1.01841 2.02599   6
   4   0  -9 0.41167 0.73530   5
   4   0  -9 -0.1209 0.47071   2
   0  -4  -9 -0.2576 0.62106   1
   4   0  -9 0.00876 0.87723   1
   4   0  -9 -0.0032 1.61084   6
  -4   0   9 0.55765 1.55735   4
  -4   0   9 0.67711 1.98080   1
   0  -4   9 -1.3116 0.65059   2
  -4   0   9 -1.0343 0.72822   2
   0  -4   9 -1.0564 1.01548   4
   0  -4   9 -2.5461 1.66212   6
  -4   0   9 1.81403 2.83568   6
   1   4  -9 0.77423 0.54736   2
   4  -1  -9 0.85756 0.79588   5
   4  -1  -9 0.22248 0.50064   2
   4  -1  -9 -0.6274 1.51366   6
   1   4  -9 1.35129 2.23906   1
   1   4  -9 0.71122 0.61790   5
   4  -1  -9 1.15777 1.00698   1
   1   4  -9 -0.2253 1.86827   6
  -1  -4   9 1.03990 2.05462   6
  -4   1   9 0.06022 2.04274   4
  -4   1   9 3.25140 3.35231   6
  -4   1   9 -1.0387 0.80860   2
  -4   1   9 1.85795 2.35163   1
  -1  -4   9 0.45336 0.65916   2
  -1  -4   9 0.51003 1.21103   4
   2   4  -9 0.04470 0.48623   2
   4  -2  -9 0.38488 0.62565   5
   2   4  -9 -0.7812 1.72225   1
   4  -2  -9 0.09674 0.50644   2
   4  -2  -9 0.01686 0.74805   1
  -4   2  -9 0.52906 1.87736   1
   2   4  -9 0.29272 1.89872   6
  -2  -4   9 -0.0337 0.67230   2
  -4   2   9 0.57617 1.92327   4
  -4   2   9 -0.8594 3.26665   1
  -4   2   9 -0.7379 0.87959   2
  -2  -4   9 -1.4588 1.17432   4
  -2  -4   9 2.11522 2.28624   6
   4  -2   9 -2.3776 1.45593   6
  -4   2   9 -1.6312 2.86330   6
  -2  -4   9 -0.5810 1.69639   1
   3   4  -9 2.11740 1.90460   6
   3   4  -9 -0.0403 0.51325   2
   4  -3  -9 -0.0758 0.64196   1
   4  -3  -9 -0.3019 0.50359   2
   4  -3  -9 0.55653 0.68522   5
  -4   3  -9 0.92799 1.77719   1
   3   4  -9 -0.7990 1.96699   1
  -3  -4   9 -0.4185 1.92750   6
  -3  -4   9 -0.2130 0.55151   2
  -4   3   9 -0.7555 0.70448   2
  -3  -4   9 -1.6802 1.04252   4
  -4   3   9 0.03171 2.14618   4
  -3  -4   9 -0.4070 1.61524   1
   4  -3   9 1.84225 1.67486   6
   4  -3   9 0.96548 1.09200   4
  -4   3   9 -1.4950 3.18212   6
  -3  -4   9 0.31324 0.84914   5
   4  -4  -9 1.14639 0.59258   2
   4  -4  -9 0.36560 0.61895   5
   4   4  -9 0.12652 0.46889   2
   4  -4  -9 -0.1583 0.62458   1
   4   4  -9 0.38710 1.68399   6
  -4   4  -9 -0.1032 0.52971   2
  -4   4  -9 1.27858 1.73564   1
   4  -4   9 -0.6322 1.05653   4
  -4   4   9 0.27895 0.91353   2
  -4   4   9 1.31653 2.26862   4
  -4  -4   9 -0.4026 0.62040   2
  -4  -4   9 -0.5785 0.77664   5
  -4  -4   9 0.60993 1.89148   1
  -4  -4   9 -0.6259 1.10318   4
  -4   4   9 -0.5137 3.08893   6
   4  -4   9 -0.1921 1.60197   6
   5   4  -9 1.04994 0.51615   2
   4  -5  -9 -0.1595 0.56253   1
   5   4  -9 2.81892 1.95279   6
  -4   5  -9 -0.1956 1.43721   1
   4  -5  -9 0.62027 0.64076   5
  -4   5  -9 0.17523 0.56072   2
   4  -5  -9 -0.2631 0.46954   2
  -5  -4   9 0.28391 0.73051   5
  -4   5   9 -0.2465 0.72949   2
   4  -5   9 -1.1925 1.53630   6
   4  -5   9 0.94716 1.15325   4
  -5  -4   9 0.64428 1.94334   1
   4  -5   9 -1.1054 1.51419   6
  -4   5   9 1.48562 3.19301   6
  -4   5   9 -2.3914 2.13878   4
  -5  -4   9 0.62637 0.66813   2
   5   3  -9 0.29202 0.48846   2
   5   3  -9 -0.1891 1.58932   6
  -3   5  -9 -0.0261 0.59617   2
   3  -5  -9 0.32429 0.43362   2
  -3   5  -9 -0.4625 1.51089   1
   3  -5  -9 0.09154 0.62843   1
   3  -5  -9 0.26751 0.53851   5
  -5  -3   9 0.00372 0.62986   2
   3  -5   9 -0.0073 1.51789   6
  -5  -3   9 1.15786 1.18698   4
   3  -5   9 0.91860 1.20865   4
  -5  -3   9 -1.0700 0.61079   5
   3  -5   9 0.26526 0.74472   2
  -5  -3   9 0.23689 1.84499   1
  -3   5   9 3.04539 2.91506   6
  -3   5   9 0.48114 2.36533   4
   2  -5  -9 0.52630 0.47024   5
   5   2  -9 1.02060 0.54435   2
   2  -5  -9 0.28903 0.70555   1
  -2   5  -9 0.62955 0.58761   2
   5   2  -9 0.70025 1.75443   6
  -2   5  -9 -0.8913 1.38187   1
   2  -5   9 1.55599 1.20008   4
   2  -5   9 1.84397 0.82176   2
  -2   5   9 2.41944 3.16274   6
  -2   5   9 0.28869 2.52029   4
  -5  -2   9 1.77447 2.08453   1
  -5  -2   9 0.33396 0.67531   2
  -5  -2   9 0.20414 1.20428   4
   2  -5   9 -0.4676 1.57494   6
   1  -5  -9 0.10227 0.63020   1
   5   1  -9 -0.4904 0.42391   2
   5   1  -9 -0.7544 1.49360   6
  -1   5  -9 -0.8033 0.54454   2
  -1   5  -9 1.68609 1.73680   4
   1  -5  -9 -0.0173 0.24355   5
   5   1  -9 -0.5714 1.20943   1
  -1   5  -9 -0.0575 1.69912   1
  -5  -1   9 0.32424 1.75625   1
  -5  -1   9 0.36243 1.32116   4
   1  -5   9 -0.4231 0.90930   4
  -5  -1   9 -0.1508 0.69063   2
  -1   5   9 0.20084 2.80510   6
  -1   5   9 -1.6923 2.48372   4
  -5  -1   9 1.55287 2.51794   6
   1  -5   9 -1.8172 1.51372   6
   1  -5   9 -0.4574 0.57298   2
   5   0  -9 0.05071 0.99397   1
   0   5  -9 -1.3953 1.69110   4
   0  -5  -9 0.11253 0.69983   1
   0   5  -9 0.71162 0.59020   5
   0   5  -9 0.00446 0.52404   2
   5   0  -9 -0.3670 0.42777   2
   5   0  -9 0.81786 1.67283   6
   0   5  -9 -0.1056 1.69455   1
   0   5  -9 -0.0410 1.86461   6
   0  -5   9 -1.0745 0.50071   2
  -5   0   9 0.19661 1.52677   4
  -5   0   9 -0.3923 1.64207   1
  -5   0   9 -0.0393 2.47223   6
   0   5   9 -0.2431 3.46962   6
   0  -5   9 1.31001 1.87183   6
   0  -5   9 0.54182 1.05978   4
  -5   0   9 0.83628 0.82008   2
   1   5  -9 0.11602 0.50462   2
   5  -1  -9 -0.3475 1.43785   6
   1   5  -9 -0.4570 1.81131   6
   5  -1  -9 0.34450 0.50369   2
   5  -1  -9 -0.4678 0.68584   1
   1   5  -9 -0.5719 1.89553   1
  -5   1   9 1.32025 2.76936   6
  -1  -5   9 0.42300 1.14425   4
  -5   1   9 -0.1073 1.90934   4
  -1  -5   9 0.05583 0.68598   2
  -1  -5   9 -0.2597 1.75379   6
  -5   1   9 -0.3373 1.92476   1
   2   5  -9 3.75101 2.24165   6
   2   5  -9 -0.1643 1.89974   1
   5  -2  -9 0.98191 0.57722   2
   5  -2  -9 1.17073 0.88184   1
  -5   2  -9 0.55727 1.70136   1
   5  -2  -9 0.77896 0.81033   5
   5  -2  -9 0.94905 1.70029   6
   2   5  -9 0.47372 0.59056   2
   5  -2   9 -0.5453 1.62868   6
  -5   2   9 1.41929 1.02036   2
  -5   2   9 0.07559 2.02135   4
  -2  -5   9 0.97053 1.19906   4
  -2  -5   9 0.43237 0.66638   2
  -2  -5   9 0.54702 0.90289   5
  -5   2   9 1.72770 3.08952   6
  -2  -5   9 -0.5964 1.78135   6
  -5   2   9 1.53783 2.10944   1
   5  -3  -9 0.48912 0.73634   1
   3   5  -9 -0.1589 0.50940   2
  -5   3  -9 -0.9688 1.09458   1
   5  -3  -9 -0.0482 0.53790   2
   5  -3  -9 0.02676 0.64429   5
   3   5  -9 -0.5767 1.70354   6
  -5   3   9 4.90345 2.55340   4
   5  -3   9 1.40722 1.24082   4
  -5   3   9 -0.3268 0.86050   2
   5  -3   9 -0.9058 1.48143   6
  -3  -5   9 0.91356 1.11246   4
  -3  -5   9 -0.2979 0.86597   5
  -3  -5   9 -0.3617 1.64761   1
  -5   3   9 -0.6466 2.92687   6
  -3  -5   9 0.38337 0.65803   2
   4   5  -9 1.08596 1.84210   6
  -5   4  -9 1.52435 1.63855   1
   5  -4  -9 0.41871 0.64688   1
   5  -4  -9 0.36497 0.63460   5
   4   5  -9 0.18757 0.48656   2
   5  -4  -9 0.53428 0.56317   2
   5  -4   9 -0.6427 1.49767   6
  -5   4   9 2.27622 2.29884   4
  -5   4   9 0.95459 3.11508   6
  -4  -5   9 0.14358 1.41597   4
   5  -4   9 1.26569 1.23836   4
  -4  -5   9 0.40559 0.63613   2
  -4  -5   9 0.71492 0.87397   5
  -4  -5   9 2.70433 2.08533   1
  -5   4   9 -0.4334 0.67488   2
  -5   5  -9 0.33873 1.34860   1
   5   5  -9 0.07765 0.39507   2
   5  -5  -9 -0.6249 0.41106   2
   5  -5  -9 -0.0535 0.59856   5
   5  -5  -9 -0.5207 0.43227   1
   5   5  -9 0.12361 1.44041   6
  -5   5   9 -0.4336 2.64192   6
  -5  -5   9 -0.4477 0.62444   5
  -5  -5   9 -0.1672 1.55674   1
  -5   5   9 2.94961 2.17585   4
  -5   5   9 0.04391 0.68966   2
   5  -5   9 -0.0851 1.53374   6
  -5  -5   9 1.26815 0.61992   2
  -5   6  -9 -0.3182 1.12993   1
   5  -6  -9 -0.1154 0.39981   1
   5  -6  -9 0.51331 0.45875   5
   6   5  -9 0.23560 1.25209   6
   5  -6  -9 -0.1221 0.37053   2
   6   5  -9 0.36095 0.38129   2
   5  -6   9 -0.1839 1.29646   6
  -5   6   9 -2.5664 1.54793   4
  -5   6   9 -0.0050 2.25896   6
  -5   6   9 1.33763 0.71311   2
  -6  -5   9 1.10076 1.61830   1
  -6  -5   9 -0.5591 0.40753   2
  -6  -5   9 0.41182 0.61452   5
  -4   6  -9 1.04023 0.58987   2
   4  -6  -9 0.21713 0.52119   1
   4  -6  -9 0.13106 0.36752   2
  -4   6  -9 -0.0897 1.43483   1
   4  -6  -9 0.28434 0.48769   5
   6   4  -9 0.06945 1.30833   6
   6   4  -9 0.24862 0.43086   2
  -4   6   9 -1.0326 2.19576   6
  -6  -4   9 0.10986 0.54626   2
  -4   6   9 1.48341 1.96738   4
  -4   6   9 1.88293 0.83528   2
  -6  -4   9 0.86413 1.65267   1
   4  -6   9 0.09927 0.51848   2
  -6  -4   9 -0.3727 0.60680   5
   4  -6   9 -0.2999 1.59702   6
   3  -6  -9 -0.3834 0.37697   2
   6   3  -9 0.24905 0.50544   2
  -3   6  -9 -0.7534 1.26877   1
  -3   6  -9 -0.6513 0.54213   2
   6   3  -9 -0.1038 1.43649   6
   3  -6  -9 -0.1565 0.54567   1
   3  -6  -9 0.17016 0.46570   5
  -6  -3   9 1.03639 0.76943   5
  -3   6   9 -1.3785 2.08353   4
  -3   6   9 -1.7179 2.57964   6
  -6  -3   9 -0.3658 0.55314   2
   3  -6   9 -0.2632 0.59382   2
   3  -6   9 -0.9101 0.89181   4
  -6  -3   9 -0.1767 1.67435   1
   3  -6   9 0.53334 1.70718   6
   6   2  -9 0.64804 1.57430   6
  -2   6  -9 -0.5922 1.41517   1
  -2   6  -9 0.53195 1.65449   4
   2  -6  -9 -0.0879 0.33090   5
   2  -6  -9 -0.7574 0.47445   1
   6   2  -9 -0.2354 0.42322   2
  -2   6  -9 -0.5071 0.53951   2
   2  -6   9 -1.1157 1.02180   4
  -6  -2   9 -0.0247 1.33857   4
  -6  -2   9 -0.1567 1.63327   1
   2  -6   9 -1.1635 1.45341   6
  -2   6   9 2.77670 2.81459   6
   2  -6   9 0.53350 0.69384   2
  -2   6   9 -1.3386 2.28535   4
  -6  -2   9 0.14909 0.61303   2
   2  -6   9 -0.8547 1.53083   6
  -1   6  -9 1.52400 1.68159   4
   6   1  -9 1.01893 1.65595   6
  -1   6  -9 -0.1978 1.60060   1
  -1   6  -9 0.61277 0.60715   2
   6   1  -9 0.41418 0.50419   2
  -1   6   9 -1.0883 2.52106   4
   1  -6   9 0.31414 0.57581   2
  -1   6   9 0.10488 3.08980   6
  -6  -1   9 1.48890 1.41689   4
  -6  -1   9 1.51422 2.20670   1
  -6  -1   9 -0.0251 0.58034   2
   1  -6   9 0.54397 1.00426   4
   1  -6   9 -0.3358 1.49157   6
   0   6  -9 0.27173 0.57287   2
   0   6  -9 0.87073 1.89863   6
   6   0  -9 -0.8937 1.39841   1
   0   6  -9 -0.0235 1.56555   1
   0  -6  -9 0.45748 0.69799   1
   6   0  -9 2.67019 1.85256   6
   6   0  -9 -0.1005 0.51260   2
   0   6  -9 1.49551 1.74370   4
  -6   0   9 0.40538 0.68628   2
   0   6   9 -0.0878 2.93730   6
  -6   0   9 0.72992 2.03021   1
   0  -6   9 -1.1809 1.64590   6
  -6   0   9 0.37122 1.53026   4
   0  -6   9 -0.3730 1.27887   1
   0  -6   9 0.38241 1.18992   4
   0  -6   9 0.96692 0.72353   2
   1   6  -9 1.20195 1.93221   1
   1   6  -9 0.81695 0.57392   2
   1   6  -9 -0.0292 1.82713   6
   6  -1  -9 0.45638 1.06124   1
   6  -1  -9 1.30815 0.66387   2
   6  -1  -9 -0.9503 1.44290   6
   1   6  -9 0.29345 1.66698   4
  -1  -6   9 -0.5705 0.59464   2
  -6   1   9 0.69402 2.24441   1
  -1  -6   9 1.01067 1.20793   4
  -1  -6   9 1.32895 1.84745   6
  -6   1   9 0.07490 2.68545   6
  -6   1   9 -0.5322 0.85346   2
  -6   1   9 2.58771 1.83851   4
   6  -2  -9 0.62037 0.92604   1
   6  -2  -9 0.88132 1.62396   6
   6  -2  -9 0.14127 0.50000   2
  -6   2  -9 -0.1246 1.60516   1
   2   6  -9 0.86065 1.95673   6
   2   6  -9 0.20538 0.50552   2
  -2  -6   9 0.03558 0.60161   2
  -6   2   9 -2.3122 2.68302   6
  -2  -6   9 0.25770 1.20862   4
  -6   2   9 -0.5634 0.83170   2
  -6   2   9 -0.9573 1.74892   4
  -6   2   9 1.14007 2.08255   1
  -2  -6   9 -1.4171 0.65446   5
   6  -3  -9 -0.0611 0.48135   2
  -6   3  -9 0.63284 1.49438   1
   6  -3  -9 0.26066 1.47555   6
   3   6  -9 0.75130 1.89944   6
   6  -3  -9 0.40667 0.71332   5
   6  -3  -9 0.13829 0.66445   1
   3   6  -9 0.25467 0.52696   2
  -3  -6   9 0.94472 0.86097   5
  -6   3   9 0.99002 2.13701   1
  -3  -6   9 0.24700 0.62322   2
  -6   3   9 -0.5496 0.74822   2
  -6   3   9 -0.0607 2.62901   6
   6  -3   9 -0.8404 1.47244   6
  -6   3   9 -1.4496 1.71995   4
  -3  -6   9 -0.3694 1.05821   4
   6  -4  -9 -0.5006 0.46683   1
   4   6  -9 -0.7584 1.42039   6
   4   6  -9 0.39265 0.45859   2
   6  -4  -9 0.69262 0.65861   5
  -6   4  -9 0.81813 1.41901   1
   6  -4  -9 -0.3400 0.42042   2
  -4  -6   9 -0.2995 0.51478   2
   6  -4   9 0.12200 1.55585   6
  -4  -6   9 -0.2549 0.63527   5
  -6   4   9 2.35045 2.63110   6
  -6   4   9 0.85800 0.83082   2
  -6   4   9 0.43069 1.75440   4
   5   6  -9 -1.0852 1.26490   6
   5   6  -9 0.65202 0.45212   2
   6  -5  -9 -0.2038 0.40605   2
  -6   5  -9 -0.1647 1.18293   1
   6  -5  -9 -0.0825 0.51825   5
   6  -5  -9 0.46232 0.60415   1
  -6   5   9 -0.6585 0.63455   2
  -5  -6   9 0.02853 0.54613   5
   6  -5   9 -1.2340 1.23688   6
  -5  -6   9 -0.2363 0.43278   2
  -5  -6   9 -0.2252 1.23298   1
  -6   5   9 0.96125 1.52312   4
  -6   5   9 1.08591 2.43618   6
   6  -6  -9 0.01266 0.45132   1
   6   6  -9 -0.4670 1.16104   6
   6  -6  -9 0.57718 0.63850   5
   6   6  -9 0.66330 0.37431   2
  -6   6  -9 0.14408 1.09461   1
   6  -6  -9 0.46424 0.33673   2
  -6  -6   9 0.55039 0.52184   5
  -6  -6   9 -0.0453 1.19517   1
  -6   6   9 0.44239 1.87618   6
  -6   6   9 1.24561 1.25676   4
  -6   6   9 -0.3205 0.47080   2
   6  -6   9 0.79535 1.27712   6
  -6   7  -9 0.16523 0.90525   1
   7   6  -9 -0.3552 0.89917   6
   6  -7  -9 -0.0860 0.33532   1
   6  -7  -9 -0.2079 0.25186   2
  -6   7   9 1.52046 1.14178   4
  -7  -6   9 -0.4732 0.86758   1
  -6   7   9 -0.6547 1.29105   6
   6  -7   9 0.05916 0.46877   2
   6  -7   9 -1.2946 0.86647   6
  -6   7   9 0.38155 0.45167   2
   5  -7  -9 -0.1349 0.28076   2
   5  -7  -9 0.14084 0.43368   1
  -5   7  -9 -0.6345 0.89107   1
   7   5  -9 -0.0978 1.03903   6
  -7  -5   9 0.12093 1.23830   1
  -5   7   9 -0.3844 0.51938   2
   5  -7   9 -0.0141 1.18386   6
  -5   7   9 0.79329 1.93752   6
  -5   7   9 0.52020 1.38237   4
   5  -7   9 0.37610 0.42383   2
  -4   7  -9 0.13991 0.47393   2
   4  -7  -9 -0.0166 0.41685   1
   4  -7  -9 0.36347 0.38763   5
  -4   7  -9 0.35386 1.17723   1
   7   4  -9 0.37695 0.38635   2
   7   4  -9 0.23345 1.16892   6
  -4   7   9 -0.6622 1.92862   6
   4  -7   9 0.59315 1.42700   6
  -4   7   9 -1.1141 1.61974   4
  -7  -4   9 -0.8407 0.42469   2
   4  -7   9 -0.7685 0.38421   2
  -7  -4   9 0.33758 1.45609   1
  -7  -4   9 -0.4185 0.53427   5
   3  -7  -9 0.00353 0.31176   5
   3  -7  -9 -0.0006 0.48584   1
   7   3  -9 0.00773 0.34935   2
  -3   7  -9 0.42420 0.51770   2
   7   3  -9 -0.7012 1.23499   6
  -3   7  -9 0.19098 0.99377   1
  -3   7   9 -0.0921 1.78088   4
   3  -7   9 -0.3704 0.48569   2
  -7  -3   9 0.50352 0.61609   5
  -7  -3   9 -0.9555 1.26999   1
   3  -7   9 -1.0028 1.32898   6
  -7  -3   9 -0.4546 0.47915   2
  -3   7   9 2.27481 2.50752   6
   7   2  -9 1.29042 1.43594   6
  -2   7  -9 0.49074 1.37363   4
   2  -7  -9 0.24014 0.58636   1
   7   2  -9 0.51552 0.46585   2
  -2   7  -9 0.04221 0.52109   2
  -2   7  -9 -1.0602 1.22357   1
  -7  -2   9 1.12766 0.79114   5
  -7  -2   9 -0.4590 0.49236   2
  -2   7   9 1.37200 2.17307   4
  -7  -2   9 -0.2046 1.47703   1
   2  -7   9 -2.5200 1.33523   6
   2  -7   9 -0.6447 0.93681   4
  -2   7   9 1.83271 2.63383   6
   2  -7   9 1.08950 0.63226   2
   1  -7  -9 -0.2324 0.49316   1
   7   1  -9 0.28996 1.43647   6
  -1   7  -9 0.25277 0.46459   2
   7   1  -9 0.46482 0.42910   2
  -1   7  -9 1.78957 1.56861   4
  -1   7  -9 0.28043 1.50753   1
  -7  -1   9 -0.7306 0.47532   2
   1  -7   9 -0.2426 1.15970   1
   1  -7   9 -0.8789 1.52170   6
   1  -7   9 -0.2774 0.92781   4
   1  -7   9 0.15619 0.58799   2
  -1   7   9 2.53436 2.38225   4
  -7  -1   9 -0.5354 1.68576   1
  -1   7   9 -1.3504 2.47211   6
   0   7  -9 0.35240 1.56687   4
   0   7  -9 -0.5049 1.59157   6
   7   0  -9 -0.3391 1.36004   6
   7   0  -9 -0.3871 0.43463   2
   0   7  -9 0.74368 0.54100   2
   0  -7  -9 0.17365 0.56327   1
   0   7  -9 -0.1984 1.53030   1
   0  -7   9 -0.4419 1.08309   1
  -7   0   9 1.01900 0.69452   2
   0   7   9 -0.6335 2.48172   6
  -7   0   9 -0.1895 1.41331   4
  -7   0   9 -0.2347 1.68327   1
   0  -7   9 -0.0485 1.01456   4
   0  -7   9 0.63302 1.62638   6
   0  -7   9 -0.8563 0.50543   2
   7  -1  -9 -0.7841 0.42072   2
   1   7  -9 1.15669 1.77776   6
   1   7  -9 0.28088 0.54904   2
   7  -1  -9 0.64087 1.47975   6
   1   7  -9 2.25140 1.66428   4
  -1  -7   9 0.73262 0.75946   5
  -7   1   9 -0.4950 1.66091   1
  -1  -7   9 0.21812 1.04571   4
  -1  -7   9 0.15111 1.25837   1
  -7   1   9 -0.3670 0.66419   2
  -1  -7   9 -0.7145 0.51953   2
  -7   1   9 -0.3938 1.41765   4
   7  -2  -9 1.49896 1.49333   6
   2   7  -9 1.32589 1.47664   4
   2   7  -9 0.22012 0.44067   2
   2   7  -9 0.41948 1.63159   6
   7  -2  -9 0.65786 0.46511   2
  -7   2   9 1.37545 0.87585   2
  -7   2   9 0.95623 1.52565   4
  -2  -7   9 -0.4787 0.52104   2
  -7   2   9 0.10341 1.98195   1
  -2  -7   9 -0.9341 0.98953   4
  -2  -7   9 -0.0203 0.67415   5
  -7   3  -9 -0.1448 1.19929   1
   3   7  -9 0.64533 1.52621   6
   7  -3  -9 -0.9954 1.16049   6
   3   7  -9 -0.1637 0.41588   2
   7  -3  -9 0.38460 0.44061   2
   7  -3  -9 0.02997 0.83267   1
  -7   3   9 -0.0674 1.52828   1
   7  -3   9 -1.4025 1.25348   6
  -7   3   9 -0.5502 0.68718   2
  -3  -7   9 -0.0606 0.49546   2
  -3  -7   9 0.22096 0.61359   5
  -7   3   9 1.14082 1.55718   4
   4   7  -9 0.81139 1.40247   6
   4   7  -9 0.17525 0.39230   2
   7  -4  -9 0.76184 0.68625   1
  -7   4  -9 0.75787 1.41497   1
   7  -4  -9 0.45449 0.38488   2
  -4  -7   9 0.42712 0.44383   2
  -7   4   9 0.00662 1.40913   4
  -4  -7   9 0.50571 0.56038   5
   7  -4   9 0.47937 1.30266   6
  -7   4   9 0.92299 2.16955   6
  -7   4   9 -0.3556 0.53134   2
  -7   5  -9 -0.1950 1.03316   1
   7  -5  -9 -0.0354 0.47772   1
   5   7  -9 0.02543 0.34211   2
   7  -5  -9 -0.0658 0.30727   2
   5   7  -9 0.53806 1.27148   6
  -7   5   9 -0.0348 0.48595   2
  -7   5   9 -1.1963 1.10567   4
  -7   5   9 1.38868 1.93217   6
   7  -5   9 1.27906 1.23063   6
   6   7  -9 0.72964 1.00814   6
  -7   6  -9 0.59180 1.04362   1
   7  -6  -9 0.22965 0.42378   1
   7  -6  -9 -0.0671 0.25420   2
  -7   6   9 1.73938 1.07378   4
   7  -6   9 -0.2500 0.87138   6
  -7   6   9 0.87777 2.13866   6
  -7   6   9 0.23219 0.37353   2
  -7   7  -9 -0.0840 0.70159   1
   7   7  -9 0.20288 0.78103   6
   7  -7  -9 -0.1084 0.22594   2
   7  -7   9 0.61269 0.85775   6
  -7   7   9 0.07303 0.25530   2
  -7   7   9 0.23242 0.72523   4
  -6   8  -9 0.38989 0.74227   1
   6  -8  -9 -0.0218 0.28238   1
   8   6  -9 -0.2315 0.60438   6
  -6   8   9 -0.1376 0.65182   4
   6  -8   9 0.30415 0.78837   6
  -6   8   9 -0.4215 0.95338   6
  -6   8   9 -0.6219 0.27474   2
  -5   8  -9 -0.1585 0.81696   1
   8   5  -9 0.57388 0.88312   6
   5  -8  -9 -0.0823 0.29016   1
   5  -8   9 0.08610 0.30754   2
  -5   8   9 -0.0384 0.36338   2
  -5   8   9 -1.3128 0.85580   4
  -8  -5   9 -0.1754 0.85477   1
   5  -8   9 0.92430 1.00437   6
  -5   8   9 1.54173 1.46253   6
   8   4  -9 -0.2108 0.95452   6
  -4   8  -9 0.48611 1.02882   1
   4  -8  -9 0.05272 0.33514   1
  -4   8  -9 0.26254 0.37463   2
  -8  -4   9 0.58624 1.17420   1
  -4   8   9 -0.1699 1.54893   6
   4  -8   9 -0.0886 0.36081   2
   4  -8   9 0.75782 1.16801   6
  -4   8   9 0.59048 1.31324   4
  -3   8  -9 0.21893 1.00065   1
  -3   8  -9 -0.2282 0.40861   2
   8   3  -9 0.27320 0.33030   2
   3  -8  -9 0.25700 0.46238   1
   8   3  -9 -0.2692 1.08080   6
  -3   8   9 -0.0422 1.74976   6
   3  -8   9 -0.7836 1.16548   6
  -8  -3   9 -0.0883 1.12616   1
  -3   8   9 1.73391 1.64535   4
   3  -8   9 0.06498 0.39725   2
   8   2  -9 -0.1486 0.37837   2
  -2   8  -9 -0.5850 1.20624   4
  -2   8  -9 -0.2575 1.15340   1
  -2   8  -9 0.23776 0.47663   2
   2  -8  -9 -0.0157 0.42048   1
   8   2  -9 0.63331 1.15800   6
  -2   8   9 0.25759 1.74313   4
  -8  -2   9 -0.4097 1.17658   1
   2  -8   9 -0.0389 1.28345   6
  -8  -2   9 0.71625 0.57678   5
   2  -8   9 0.11580 0.40316   2
  -2   8   9 -0.6277 1.82836   6
  -8  -2   9 0.39458 0.48246   2
  -1   8  -9 -0.0211 1.23403   1
  -1   8  -9 -0.4375 0.43244   2
   8   1  -9 0.84196 1.19471   6
   8   1  -9 0.01011 0.35348   2
  -1   8  -9 -0.1982 1.17495   4
   1  -8  -9 0.18311 0.51154   1
  -8  -1   9 -0.5963 1.24743   1
  -1   8   9 -2.1632 1.71424   4
  -1   8   9 1.41820 1.97619   6
   1  -8   9 -0.6937 0.38362   2
  -8  -1   9 -0.6688 0.44543   2
   0  -8  -9 0.33542 0.53422   1
   0   8  -9 1.24182 1.32168   4
   0   8  -9 1.25929 1.45839   6
   0   8  -9 0.31739 0.41215   2
   8   0  -9 0.21445 0.37632   2
   8   0  -9 0.59787 1.26370   6
   0   8   9 -2.2780 1.66975   6
   0  -8   9 -0.8460 0.67846   5
   0  -8   9 0.34020 0.47169   2
   0  -8   9 -0.0594 0.90091   1
  -8   0   9 -0.2973 0.47516   2
  -8   0   9 -1.0804 1.27783   1
   8  -1  -9 -0.0064 0.39827   2
   8  -1  -9 0.26748 1.15995   6
   1   8  -9 -0.0395 1.17045   4
   1   8  -9 0.24022 0.42655   2
   1   8  -9 -0.2126 1.40515   6
  -1  -8   9 -0.2076 0.91797   1
  -1  -8   9 0.56144 0.49418   2
  -8   1   9 2.61910 1.97845   1
  -8   1   9 1.16579 0.57137   2
  -1  -8   9 0.30363 0.70658   5
   2   8  -9 -0.0996 1.16735   4
   2   8  -9 -1.4568 1.17600   6
   8  -2  -9 0.58203 0.42101   2
   2   8  -9 -0.4998 0.39060   2
   8  -2  -9 -0.3271 1.11262   6
  -8   2   9 -0.3371 0.45833   2
  -8   2   9 -0.3294 1.42726   1
  -2  -8   9 -0.0967 0.41523   2
  -2  -8   9 -0.1103 0.61057   5
  -2  -8   9 0.03900 0.86707   1
   3   8  -9 0.08952 0.39897   2
   3   8  -9 -0.6849 1.12434   4
   8  -3  -9 0.41702 1.03915   6
   3   8  -9 0.60769 1.29065   6
   8  -3  -9 -0.2823 0.34807   2
  -8   3  -9 0.21260 1.23347   1
   8  -3   9 0.40470 1.08676   6
  -8   3   9 -0.2343 0.53524   2
  -8   3   9 0.11326 1.19039   4
  -8   3   9 -0.4326 1.40086   1
  -3  -8   9 -0.1303 0.34622   2
   4   8  -9 0.72637 1.08501   6
   4   8  -9 0.44756 0.99575   4
   8  -4  -9 0.09416 0.29917   2
  -8   4  -9 0.26592 1.06665   1
   4   8  -9 -0.2630 0.31679   2
   8  -4   9 0.18141 0.97313   6
  -8   4   9 1.16624 1.06269   4
  -8   4   9 -0.1456 0.46142   2
   5   8  -9 -0.8361 0.78470   6
   8  -5  -9 -0.2440 0.23680   2
   5   8  -9 -0.4447 0.78832   4
  -8   5  -9 -0.4578 0.77206   1
  -8   5   9 -0.0627 0.35502   2
   8  -5   9 -0.4710 0.81859   6
  -8   5   9 1.05355 0.83953   4
  -8   6  -9 -0.5047 0.64616   1
   6   8  -9 -0.2380 0.69166   6
   6   8  -9 -0.7357 0.60990   4
   8  -6  -9 0.18856 0.20743   2
  -8   6   9 -0.0240 0.23743   2
   8  -6   9 0.77952 0.73085   6
   5  -9  -9 0.05845 0.29709   1
   9   5  -9 -0.0512 0.62322   6
  -5   9   9 1.02103 0.74486   4
  -9  -5   9 0.37115 0.67667   1
  -4   9  -9 -0.3578 0.80758   1
   9   4  -9 -0.5810 0.64219   6
   4  -9  -9 -0.0660 0.25253   1
  -4   9  -9 -0.2925 0.24791   2
  -4   9   9 0.46258 0.84857   4
  -4   9   9 -0.1701 1.12307   6
  -9  -4   9 0.21932 0.80818   1
   4  -9   9 0.06500 0.23027   2
   3  -9  -9 -0.0839 0.30101   1
   9   3  -9 -0.2641 0.73860   6
  -3   9  -9 0.02356 0.29844   2
  -9  -3   9 0.28510 0.98776   1
  -3   9   9 -0.8975 1.07203   4
   3  -9   9 -0.5303 0.24566   2
  -3   9   9 0.47017 1.24833   6
  -2   9  -9 -0.0685 0.31800   2
  -2   9  -9 -0.9192 1.02547   4
   9   2  -9 -0.0927 0.28345   2
   9   2  -9 -0.4329 0.79172   6
   2  -9  -9 -0.0538 0.35457   1
   2  -9   9 0.15018 0.33281   2
  -2   9   9 -0.0601 1.23609   4
  -2   9   9 3.12088 1.83935   6
  -9  -2   9 -0.4343 0.98670   1
   9   1  -9 0.72641 0.97799   6
   1  -9  -9 -0.0446 0.34256   1
  -1   9  -9 0.04518 0.35715   2
  -1   9  -9 0.59289 1.01347   4
   9   1  -9 0.10008 0.29137   2
  -1   9   9 1.05989 1.71402   6
  -9  -1   9 0.22419 1.05611   1
   1  -9   9 -0.1017 0.34211   2
   9   0  -9 -0.5661 0.91178   6
   0   9  -9 -0.4817 0.82741   4
   0   9  -9 0.02956 0.34262   2
   0   9  -9 -1.2914 1.20998   6
   9   0  -9 0.23770 0.30746   2
   0  -9  -9 -0.2180 0.35942   1
   0  -9   9 -0.0716 0.65712   1
   0   9   9 1.67902 1.57375   6
  -9   0   9 0.40019 0.69675   2
   0  -9   9 -0.4281 0.32071   2
  -9   0   9 0.59432 1.21929   1
   1   9  -9 -0.3151 0.33334   2
   1   9  -9 1.34994 1.17245   6
   9  -1  -9 0.35394 0.33001   2
   1   9  -9 0.27005 0.97765   4
   9  -1  -9 -0.7536 0.81818   6
  -1  -9   9 0.13650 0.34586   2
  -1  -9   9 -0.3361 0.70127   1
  -9   1   9 0.01954 1.25547   1
  -9   1   9 -0.0002 0.41199   2
   9  -2  -9 0.84038 0.36011   2
   2   9  -9 -0.6138 0.96419   6
   9  -2  -9 -0.1903 0.80042   6
   2   9  -9 -0.2787 0.88025   4
   2   9  -9 -0.3395 0.31682   2
  -2  -9   9 -0.1006 0.78911   1
  -9   2   9 0.27117 0.41668   2
  -2  -9   9 0.47426 0.31603   2
  -9   2   9 0.46462 1.25789   1
   9  -3  -9 -0.1825 0.23278   2
   3   9  -9 -0.4634 0.83910   6
   3   9  -9 0.41808 0.31007   2
   3   9  -9 -0.3463 0.74142   4
   9  -3  -9 0.90130 1.05838   6
  -3  -9   9 -0.4080 0.58524   1
   9  -3   9 -0.2809 0.83873   6
  -9   3   9 0.04540 0.35043   2
  -9   3   9 0.10687 1.02257   1
   9  -4  -9 -0.1306 0.19761   2
   4   9  -9 -0.0623 0.73160   6
  -9   4  -9 0.54569 0.93838   1
   4   9  -9 -0.1532 0.66973   4
   4   9  -9 0.71071 0.43483   2
  -9   4   9 -0.1919 0.27915   2
  -4  -9   9 -0.0657 0.61639   1
   9  -4   9 -0.0414 0.70809   6
   5   9  -9 -0.0970 0.77015   6
   5   9  -9 -0.0117 0.89981   4
  -5  -9   9 -0.2028 0.55817   1
  10   2  -9 -0.4560 0.61875   6
  -2  10  -9 0.10564 0.31342   2
   2 -10  -9 0.06398 0.25785   1
  -2  10   9 -0.5600 1.01250   6
 -10  -2   9 0.64426 0.83291   1
  10   1  -9 -0.3087 0.66445   6
  -1  10  -9 0.39966 0.26955   2
   1 -10  -9 0.06443 0.30201   1
 -10  -1   9 0.00666 0.78356   1
  -1  10   9 -0.8377 1.04768   6
   1 -10   9 0.28143 0.23058   2
   0  10  -9 0.15843 0.24529   2
   0  10  -9 0.90502 0.82824   4
  10   0  -9 0.41950 0.67028   6
 -10   0   9 -0.9049 0.66443   1
   1  10  -9 0.09585 0.28765   2
   1  10  -9 0.63340 0.71760   4
  10  -1  -9 1.19748 0.71966   6
  -1 -10   9 -0.0486 0.65950   1
 -10   1   9 -0.0625 0.70375   1
   2  10  -9 -0.2061 0.60866   4
   0   0 -10 453.384 38.5599   1
   0   0 -10 415.981 36.5124   2
   0   0  10 396.644 39.0879   6
   0   0  10 413.588 37.6770   4
   0   1 -10 0.04584 0.49652   5
  -1   0 -10 0.46949 1.42170   1
   0   1 -10 0.10093 0.49776   2
   0  -1 -10 -0.1211 0.87508   1
   0  -1 -10 -0.3507 0.34072   5
   1   0 -10 0.47815 0.50269   2
   0   1 -10 0.09557 1.52256   1
   1   0 -10 0.29731 1.01097   1
   1   0 -10 -0.1823 0.45053   5
  -1   0 -10 -0.3888 0.31406   5
   0   1  10 -1.0336 1.87323   4
  -1   0  10 2.15865 2.80115   6
   1   0  10 0.33222 2.76573   6
   0  -1  10 -0.0641 1.53263   4
   0   1  10 0.41720 2.82006   6
  -1   0  10 0.97279 1.70623   4
   0  -1  10 -1.3382 2.28701   6
   1  -1 -10 47.7873 5.90800   1
   1   1 -10 66.9831 5.13468   5
   1   1 -10 52.7769 4.91879   2
   1  -1 -10 58.6313 4.98596   5
  -1   1 -10 58.2446 4.92509   5
   1  -1 -10 48.1117 4.81642   2
  -1   1 -10 50.4102 7.12189   1
  -1   1 -10 49.5313 4.85961   2
   1   1 -10 49.7959 6.89322   1
  -1  -1 -10 50.2747 6.13298   1
  -1  -1  10 52.7931 6.49836   4
  -1   1  10 45.6167 6.65382   4
  -1  -1  10 47.9149 8.17064   6
   1  -1  10 52.7860 6.23346   4
   1  -1  10 56.0502 8.13777   6
  -1   1  10 41.6720 8.06659   6
  -1   2 -10 6.70388 3.18340   1
   1  -2 -10 7.54343 1.95660   1
  -1   2 -10 8.45358 1.23029   5
   1  -2 -10 7.25986 1.06535   2
   2   1 -10 6.98487 1.21940   2
   2   1 -10 7.83800 2.74344   1
  -1   2 -10 10.8425 1.40159   2
   1  -2 -10 8.52599 1.17840   5
   2   1 -10 10.8679 1.54384   5
  -2  -1  10 7.40348 2.30564   4
  -1   2  10 4.37116 3.00376   6
   1  -2  10 8.78587 3.12043   6
  -2  -1  10 6.15222 1.44972   2
  -2  -1  10 4.39292 3.47303   6
   1  -2  10 11.2077 2.37307   4
  -1   2  10 8.10759 2.69561   4
   0  -2 -10 18.2671 2.91893   1
   0  -2 -10 24.3155 2.01169   5
   2   0 -10 18.7674 2.29915   2
   2   0 -10 20.4173 3.95214   1
   2   0 -10 23.6216 2.60687   5
   0   2 -10 15.9859 2.23915   2
  -2   0 -10 23.8868 4.73493   1
   0   2 -10 24.0220 2.30089   5
   0   2 -10 21.7354 5.04750   1
  -2   0  10 15.0319 4.80866   6
  -2   0  10 23.7143 4.06389   4
   0   2  10 20.4301 5.26805   6
   0  -2  10 21.7472 3.45007   4
  -2   0  10 11.4359 2.43167   2
   0  -2  10 27.3855 5.27519   6
  -2   1 -10 8.49317 3.44268   1
   1   2 -10 7.49553 1.27239   2
   2  -1 -10 8.35542 1.22945   2
   1   2 -10 7.07048 3.21514   1
   1   2 -10 9.79520 1.42221   5
   2  -1 -10 7.42112 2.11799   1
   2  -1 -10 9.90708 1.43540   5
  -1  -2  10 7.27437 3.23087   6
  -2   1  10 8.09536 4.07918   6
  -1  -2  10 8.50653 2.12850   4
   2  -1  10 8.22892 3.11060   6
  -2   1  10 5.30254 2.42437   4
  -1  -2  10 8.90094 1.62321   2
   2   2 -10 8.92631 1.44651   5
   2  -2 -10 6.94308 1.98372   1
   2   2 -10 10.3908 3.29324   1
  -2   2 -10 7.61814 1.18030   2
   2  -2 -10 7.40413 1.14402   2
   2  -2 -10 8.01746 1.31703   5
   2   2 -10 6.47804 1.18454   2
   2   2 -10 21.3307 3.60205   6
  -2   2 -10 6.00810 3.20778   1
  -2  -2  10 5.34177 1.36103   2
  -2   2  10 6.01536 3.61580   6
  -2   2  10 7.87111 2.69618   4
   2  -2  10 6.98982 2.96523   6
  -2  -2  10 7.12783 3.36249   6
  -2  -2  10 13.8783 3.70871   1
  -2  -2  10 7.24919 2.14798   4
   2  -2  10 8.30413 2.03308   4
   2  -3 -10 10.0954 1.57855   5
  -2   3 -10 6.27525 3.32325   1
   2  -3 -10 14.0107 2.62631   1
  -2   3 -10 11.6979 1.64536   2
   3   2 -10 10.8789 3.43621   1
   3   2 -10 34.4009 4.45009   6
   2  -3 -10 13.8286 1.56354   2
   3   2 -10 16.7233 2.05698   5
   3   2 -10 12.7512 1.71241   2
   2  -3  10 11.7093 2.36207   4
  -3  -2  10 14.2445 2.87900   4
  -3  -2  10 13.8126 3.88421   6
  -2   3  10 5.48547 3.89587   6
  -2   3  10 7.16625 2.93716   4
  -3  -2  10 22.4974 4.62503   1
   2  -3  10 9.02947 3.10185   6
  -3  -2  10 13.4281 2.00939   2
  -1   3 -10 42.9199 4.40217   5
   1  -3 -10 51.4067 4.28261   5
   1  -3 -10 37.9164 4.95376   1
   3   1 -10 55.9566 4.67585   5
   3   1 -10 48.5103 6.29120   1
   3   1 -10 50.0684 4.44090   2
  -1   3 -10 35.2941 7.64368   1
  -1   3 -10 49.3959 4.46826   2
  -1   3  10 41.4646 6.33583   4
   1  -3  10 60.6861 7.63999   6
  -3  -1  10 40.9545 7.65236   6
  -3  -1  10 47.2018 5.98640   4
  -1   3  10 41.7978 7.90682   6
   1  -3  10 52.0894 5.80848   4
  -3  -1  10 39.1996 4.57222   2
   0   3 -10 -0.4594 0.34571   5
   3   0 -10 0.11853 0.54233   5
   3   0 -10 -0.3068 0.46328   2
   3   0 -10 0.28453 1.00184   1
   0   3 -10 -1.2293 0.42106   2
   0  -3 -10 -0.1781 0.62568   1
   0   3 -10 1.33544 2.21267   1
  -3   0  10 -3.0976 2.50150   6
  -3   0  10 -0.7095 0.74229   2
  -3   0  10 -1.9706 1.34650   4
   0   3  10 1.60916 2.91411   6
   0  -3  10 0.24953 0.76064   2
   0  -3  10 -0.9829 1.13594   4
   0  -3  10 1.65002 2.13665   6
   1   3 -10 39.5070 7.79492   1
  -3   1 -10 33.3930 6.96634   1
   3  -1 -10 51.7418 5.78867   1
   1   3 -10 51.6171 4.62885   5
   3  -1 -10 45.4165 4.47530   2
   1   3 -10 53.5269 4.57964   2
   3  -1 -10 46.6202 4.64637   5
   3  -1  10 51.1218 7.54069   6
  -3   1  10 56.5135 9.19644   6
  -3   1  10 55.4712 7.00300   4
  -1  -3  10 44.2842 4.68015   2
  -1  -3  10 48.0714 7.25312   6
  -3   1  10 42.4438 4.76366   2
  -1  -3  10 49.3761 5.73502   4
   2   3 -10 31.6062 4.25912   6
   3  -2 -10 12.6574 1.60664   2
   2   3 -10 12.8083 4.14543   1
  -3   2 -10 3.74025 2.80370   1
   3  -2 -10 11.6534 2.51528   1
   2   3 -10 11.4469 1.65426   2
   3  -2 -10 12.2724 1.78021   5
   2   3 -10 15.2662 1.90268   5
  -3   2  10 15.3746 3.62497   4
  -2  -3  10 16.9925 3.99291   6
   3  -2  10 9.96558 2.32467   4
  -3   2  10 12.6445 1.96403   2
  -2  -3  10 12.4504 2.40553   4
  -2  -3  10 21.4860 4.59874   1
  -3   2  10 9.19142 4.20668   6
   3  -2  10 11.8843 3.27771   6
  -2  -3  10 10.5685 1.83126   2
   3  -3 -10 50.3874 4.71225   5
   3  -3 -10 44.0214 4.47967   2
   3   3 -10 38.2988 7.24200   1
   3  -3 -10 48.2768 5.46958   1
   3   3 -10 46.0305 4.56548   2
  -3  -3  10 61.0028 6.17205   4
  -3   3  10 50.6613 6.99419   4
  -3  -3  10 52.4970 4.84812   2
   3  -3  10 48.1992 5.69913   4
   3  -3  10 49.7590 6.94046   6
  -3   3  10 50.5548 9.12396   6
  -3  -3  10 59.1374 7.69631   6
   4   3 -10 11.5380 2.85825   6
   4   3 -10 4.20535 2.36718   1
   3  -4 -10 3.81704 0.77473   2
  -3   4 -10 1.20345 1.89106   1
   3  -4 -10 3.95897 1.34392   1
  -3   4 -10 3.25750 0.87670   2
   3  -4 -10 4.57775 0.96537   5
   4   3 -10 2.79090 0.83551   2
  -3   4  10 3.76478 3.48733   6
  -4  -3  10 4.14707 1.53386   4
  -4  -3  10 3.82758 2.39849   6
  -4  -3  10 3.27864 1.07541   2
   3  -4  10 5.22072 2.46688   6
  -4  -3  10 11.0308 3.53099   1
  -3   4  10 0.00170 2.11115   4
  -4  -3  10 3.95121 1.22713   5
   3  -4  10 2.38862 1.48033   4
   2  -4 -10 7.70633 1.88160   1
  -2   4 -10 4.10069 2.72087   1
   2  -4 -10 6.67232 0.95053   2
  -2   4 -10 7.01804 1.18529   2
   4   2 -10 6.98225 1.22428   2
   4   2 -10 21.3066 3.72856   6
   4   2 -10 4.67831 2.50907   1
   2  -4 -10 6.70940 1.06145   5
   2  -4  10 5.60773 2.56494   6
  -4  -2  10 6.72020 2.95184   6
  -4  -2  10 5.41777 1.85056   4
  -2   4  10 9.42767 2.99320   4
   2  -4  10 4.89477 1.67296   4
  -2   4  10 1.23361 3.18516   6
  -4  -2  10 5.42097 1.29749   2
  -4  -2  10 20.6185 4.62655   1
   4   1 -10 0.66300 0.65100   5
  -1   4 -10 0.79029 2.16530   1
  -1   4 -10 2.05395 0.78565   2
   4   1 -10 0.78104 1.48563   1
   4   1 -10 6.03270 2.36459   6
   1  -4 -10 1.60846 0.98021   1
   1  -4 -10 1.51946 0.39974   5
   4   1 -10 1.29230 0.55072   2
   1  -4  10 0.99937 1.27049   4
  -4  -1  10 3.43404 1.94903   4
  -1   4  10 1.15639 2.99289   6
  -4  -1  10 -0.3080 2.38329   6
   1  -4  10 2.78156 2.28326   6
  -4  -1  10 3.11808 1.07125   2
  -4  -1  10 3.90761 2.47165   1
   1  -4  10 2.95472 1.00322   2
  -1   4  10 1.93588 2.41879   4
   0  -4 -10 196.551 20.6642   1
   4   0 -10 231.132 20.1362   2
   0   4 -10 233.411 20.2383   5
   0   4 -10 245.904 20.1795   2
   4   0 -10 258.301 20.4362   5
   4   0 -10 245.629 21.9240   1
  -4   0  10 241.625 21.4392   4
   0   4  10 172.829 22.1362   6
  -4   0  10 235.237 22.8934   6
   0  -4  10 236.007 22.0678   6
   0  -4  10 220.565 20.2696   2
   0  -4  10 249.060 20.9133   4
   1   4 -10 1.43420 0.64770   5
   1   4 -10 3.81732 2.26618   6
   4  -1 -10 2.77127 0.89284   5
   1   4 -10 1.21457 0.65310   2
   4  -1 -10 2.42189 1.37306   1
   4  -1 -10 1.81332 0.71734   2
   1   4 -10 -0.9835 1.75275   1
  -4   1  10 8.90127 3.26057   1
  -4   1  10 1.55661 1.93061   4
  -4   1  10 3.08378 1.07546   2
  -4   1  10 1.21255 3.14165   6
  -1  -4  10 -0.2219 1.12666   4
  -1  -4  10 1.15399 2.03104   6
  -1  -4  10 1.43867 0.80217   2
   2   4 -10 27.8607 4.04339   6
   4  -2 -10 6.82423 1.11958   2
  -4   2 -10 1.09601 2.00945   1
   4  -2 -10 6.77503 1.94809   1
   2   4 -10 3.05973 2.58491   1
   4  -2 -10 5.91481 1.25740   5
   2   4 -10 9.23317 1.33911   2
  -2  -4  10 4.96476 1.29741   2
  -2  -4  10 7.89782 3.13723   1
  -4   2  10 11.6819 2.98897   4
  -4   2  10 4.39021 1.23483   2
  -2  -4  10 6.92045 1.86173   4
   4  -2  10 4.99633 2.42031   6
  -2  -4  10 8.45221 3.01257   6
  -4   2  10 9.86816 3.93184   6
   3   4 -10 4.05249 0.88789   2
   3   4 -10 0.07561 1.90632   1
   3   4 -10 12.4860 3.03907   6
   4  -3 -10 4.37526 1.06200   5
   4  -3 -10 5.23396 1.57883   1
  -4   3 -10 0.47783 1.64725   1
   4  -3 -10 5.65810 0.97872   2
  -3  -4  10 3.09399 2.31369   6
  -3  -4  10 3.28843 1.48133   4
  -3  -4  10 5.03574 2.52315   1
  -4   3  10 1.03518 3.24547   6
  -4   3  10 2.57355 2.34429   4
  -4   3  10 5.25989 1.36733   2
   4  -3  10 7.81915 1.82182   4
   4  -3  10 3.52022 2.03063   6
  -3  -4  10 3.56975 0.99946   2
  -3  -4  10 3.39771 1.35360   5
   4  -4 -10 4.33577 0.84353   2
   4   4 -10 11.0921 2.81155   6
   4  -4 -10 3.79679 1.44026   1
   4  -4 -10 4.17366 1.01519   5
   4   4 -10 3.35511 0.80301   2
  -4   4 -10 1.21012 1.74888   1
  -4  -4  10 4.14862 1.52656   4
  -4   4  10 2.53631 2.59954   4
  -4  -4  10 4.35974 1.24678   5
   4  -4  10 2.66036 2.02874   6
  -4   4  10 1.61762 1.07804   2
   4  -4  10 2.59834 1.52721   4
  -4  -4  10 3.77910 1.05274   2
  -4   4  10 1.55491 3.42334   6
  -4  -4  10 7.81507 3.08783   1
   4  -5 -10 2.64045 0.66037   2
   4  -5 -10 3.45686 1.20987   1
   5   4 -10 3.04788 0.77982   2
   5   4 -10 6.70758 2.19877   6
  -4   5 -10 1.30522 1.64348   1
  -4   5 -10 3.55312 0.74977   2
   4  -5 -10 4.90223 0.91542   5
  -5  -4  10 2.44793 0.79882   2
  -4   5  10 1.30547 0.99434   2
  -5  -4  10 7.62796 2.83414   1
  -4   5  10 1.84449 2.83931   6
   4  -5  10 3.15826 2.18064   6
  -4   5  10 5.20689 2.42940   4
  -5  -4  10 2.94482 1.10613   5
   4  -5  10 1.99064 1.98768   6
   4  -5  10 3.43264 1.46381   4
   5   3 -10 16.1673 1.97048   2
   3  -5 -10 16.4831 2.52473   1
   3  -5 -10 20.8532 2.10832   5
  -3   5 -10 16.2093 2.02372   2
   3  -5 -10 15.6954 1.78369   2
  -3   5  10 9.03955 4.27435   6
  -5  -3  10 21.1066 2.75647   5
  -5  -3  10 14.1466 2.12461   2
   3  -5  10 13.9698 3.39569   6
  -3   5  10 16.8217 4.06714   4
  -5  -3  10 18.9412 2.74892   4
   3  -5  10 17.6862 2.48750   2
   3  -5  10 15.3694 2.68065   4
   5   2 -10 6.68858 2.37155   6
   5   2 -10 1.79535 1.93641   1
   2  -5 -10 2.90943 0.58056   5
   2  -5 -10 1.77048 1.00662   1
   5   2 -10 2.19387 0.66468   2
  -2   5 -10 2.44845 0.77854   2
  -2   5 -10 -0.2789 1.63622   1
  -2   5  10 3.44305 2.82878   4
  -5  -2  10 9.98297 3.46366   1
   2  -5  10 2.70551 1.40047   4
  -2   5  10 0.67157 2.97516   6
   2  -5  10 4.35768 1.07613   2
  -5  -2  10 2.75071 1.46627   4
  -5  -2  10 4.62573 2.78970   6
   2  -5  10 4.30578 2.41407   6
  -5  -2  10 2.52710 0.85478   2
   1  -5 -10 76.2814 7.84688   1
  -1   5 -10 77.1209 7.17002   2
   5   1 -10 82.1685 7.15439   2
   5   1 -10 76.8744 8.92327   1
  -5  -1  10 83.4618 8.11087   4
  -1   5  10 65.1836 10.7678   6
   1  -5  10 82.9959 7.84187   4
   1  -5  10 75.9390 8.82633   6
   1  -5  10 85.7479 7.37210   2
  -5  -1  10 77.6293 9.24307   6
  -1   5  10 57.4748 8.90911   4
  -5  -1  10 77.4673 7.33773   2
   5   0 -10 -0.7401 1.48983   6
   0   5 -10 -0.6893 1.55951   1
   0   5 -10 0.10674 0.54929   2
   0   5 -10 -0.1009 1.66271   4
   5   0 -10 -0.1445 0.85880   1
   0  -5 -10 -0.3363 0.57027   1
   5   0 -10 0.52422 0.47955   2
  -5   0  10 0.11450 0.72748   2
  -5   0  10 -0.1895 2.71352   6
   0  -5  10 1.22281 1.86343   6
  -5   0  10 -0.5791 1.81245   1
  -5   0  10 0.01469 1.63974   4
   0  -5  10 0.57281 0.78028   2
   0  -5  10 0.58527 1.08932   4
   0   5  10 -2.0733 2.66528   6
   1   5 -10 85.4341 7.70765   2
   5  -1 -10 87.7474 7.69226   2
   5  -1 -10 88.1955 9.02838   1
   1   5 -10 75.0822 7.70605   5
   5  -1 -10 82.8150 7.89072   5
  -1  -5  10 90.3730 9.51401   6
  -5   1  10 97.2117 11.9924   6
  -1  -5  10 84.0009 8.35665   4
  -5   1  10 86.9490 9.04818   4
  -1  -5  10 79.5422 7.80220   2
   2   5 -10 9.71444 2.77512   6
  -5   2 -10 0.95527 1.78408   1
   2   5 -10 -0.1406 1.84339   1
   5  -2 -10 3.49868 0.82502   2
   5  -2 -10 5.29882 1.23293   5
   5  -2 -10 2.90557 1.41938   1
   2   5 -10 4.72919 0.96887   2
  -5   2  10 15.6120 5.93447   1
  -2  -5  10 2.23085 0.89835   2
  -2  -5  10 2.35714 2.12698   6
  -2  -5  10 3.89125 1.45110   4
   5  -2  10 0.39864 1.77451   6
  -5   2  10 0.03073 1.95283   4
  -5   2  10 0.63176 0.89320   2
  -5   2  10 6.30986 3.50972   6
   3   5 -10 22.6162 2.35496   2
   5  -3 -10 16.6121 3.05898   1
   5  -3 -10 20.9497 2.27535   2
   5  -3 -10 18.8785 2.45539   5
  -3  -5  10 19.7518 2.85151   4
  -3  -5  10 16.5203 2.66765   5
  -3  -5  10 18.0002 2.38437   2
   5  -3  10 14.2232 2.61921   4
  -5   3  10 16.3398 2.44191   2
  -5   3  10 16.3752 4.95708   6
  -3  -5  10 23.8745 5.12380   1
  -5   3  10 19.3577 3.88935   4
   5  -3  10 17.0110 3.80275   6
   4   5 -10 3.44790 0.80726   2
   5  -4 -10 2.08582 0.80012   5
  -5   4 -10 1.58144 1.71660   1
   4   5 -10 10.5289 2.59271   6
   5  -4 -10 3.75162 0.76678   2
   5  -4 -10 3.06418 1.20418   1
  -4  -5  10 4.50349 2.45625   1
  -4  -5  10 1.16011 0.95214   5
  -4  -5  10 2.27908 0.82831   2
  -5   4  10 1.68708 1.03036   2
  -5   4  10 4.10380 3.46379   6
   5  -4  10 3.94978 1.53444   4
  -4  -5  10 5.38071 1.40697   4
   5  -4  10 5.24648 2.43817   6
  -5   4  10 1.47459 1.95397   4
   5  -4  10 4.43079 2.22641   6
   5  -5 -10 41.3981 4.75817   1
   5   5 -10 47.6770 4.14103   2
   5  -5 -10 47.2590 4.06818   2
   5  -5 -10 47.2124 4.27048   5
  -5  -5  10 41.5871 4.17458   2
  -5   5  10 40.6426 4.32755   2
  -5  -5  10 60.5722 6.78693   1
   5  -5  10 32.4611 5.51385   6
  -5   5  10 43.3019 5.96637   4
  -5  -5  10 34.7511 4.30365   5
  -5   5  10 41.6902 6.90859   6
   6   5 -10 -0.1312 0.33035   2
  -5   6 -10 0.23446 1.00078   1
   6   5 -10 -0.0669 1.26809   6
   5  -6 -10 0.05227 0.32940   2
   5  -6 -10 -0.2184 0.36570   1
   5  -6 -10 0.19220 0.39611   5
  -5   6  10 1.27008 2.07522   6
  -5   6  10 -0.7681 1.34569   4
  -6  -5  10 0.02118 1.10044   1
  -6  -5  10 -0.1142 0.41156   2
  -6  -5  10 -0.0528 0.58477   5
  -5   6  10 -0.7455 0.54176   2
   5  -6  10 -1.2571 1.14611   6
   4  -6 -10 107.759 9.24955   2
   4  -6 -10 107.298 10.0807   1
  -4   6 -10 94.4881 9.30372   2
   4  -6 -10 117.634 9.42741   5
   6   4 -10 113.270 9.39746   2
  -6  -4  10 106.847 9.68086   5
   4  -6  10 91.3373 9.45223   2
  -6  -4  10 104.179 9.43500   2
   4  -6  10 100.412 10.7835   6
  -4   6  10 106.390 10.9163   4
  -4   6  10 111.769 12.0632   6
   6   3 -10 0.95505 1.47021   6
   6   3 -10 0.44363 0.42326   2
   3  -6 -10 -0.0042 0.57021   1
  -3   6 -10 0.15857 0.54226   2
   3  -6 -10 -0.1540 0.35625   5
  -3   6 -10 -0.0230 1.26666   1
   3  -6  10 0.13171 1.72029   6
  -6  -3  10 -0.4854 0.67013   5
   3  -6  10 -0.5519 0.53376   2
  -6  -3  10 0.26745 0.56435   2
  -6  -3  10 -0.1609 1.44389   1
  -3   6  10 -2.7400 1.95735   4
   3  -6  10 0.08738 1.00482   4
  -3   6  10 -0.0712 2.81141   6
  -2   6 -10 20.6254 2.05179   2
   6   2 -10 12.7230 1.72557   2
   2  -6 -10 12.7580 2.40049   1
  -6  -2  10 15.4829 1.96028   2
   2  -6  10 13.4250 2.45881   4
   2  -6  10 16.5278 3.41308   6
  -6  -2  10 14.1508 2.33014   4
  -2   6  10 17.5967 4.09396   4
   2  -6  10 17.8748 2.12301   2
   2  -6  10 10.4926 2.96672   6
  -2   6  10 11.3187 4.37257   6
   6   1 -10 1.83080 1.61971   6
   6   1 -10 0.76979 0.49706   2
  -1   6 -10 -0.5809 1.49255   4
  -1   6 -10 0.54652 1.53566   1
  -1   6 -10 0.72826 0.57974   2
   1  -6 -10 0.17360 0.59088   1
   1  -6  10 0.41077 0.59998   2
   1  -6  10 -0.8766 1.54360   6
  -1   6  10 0.99352 2.94224   6
  -1   6  10 -0.8937 2.13739   4
  -6  -1  10 -0.0849 1.68075   1
  -6  -1  10 0.60192 0.72138   2
   1  -6  10 -1.0941 0.90970   4
  -6  -1  10 -0.0943 1.20818   4
   0  -6 -10 14.3121 2.37148   1
   6   0 -10 35.6236 4.10661   6
   6   0 -10 15.4418 1.75501   2
   0   6 -10 4.31646 2.72686   1
   0   6 -10 24.9278 3.32888   4
   6   0 -10 15.8324 3.29642   1
   0   6 -10 14.3948 1.74156   2
  -6   0  10 10.9374 2.61017   4
   0   6  10 10.6217 4.02641   6
   0  -6  10 9.24444 2.94133   6
   0  -6  10 16.8771 2.64945   4
   0  -6  10 12.2510 1.79366   2
  -6   0  10 9.90248 3.39775   6
  -6   0  10 12.1695 1.81741   2
   0  -6  10 6.81731 2.60845   1
   1   6 -10 0.03265 0.50397   2
   1   6 -10 -0.4581 1.78636   6
   1   6 -10 0.19739 1.68986   1
   1   6 -10 0.21487 1.56871   4
   6  -1 -10 0.79285 1.04787   1
   6  -1 -10 -0.0859 0.49172   2
   6  -1 -10 0.91795 1.66928   6
  -6   1  10 0.35509 2.54028   6
  -1  -6  10 -1.5420 1.02728   4
  -6   1  10 0.84791 0.81585   2
  -6   1  10 1.54096 2.30892   1
  -1  -6  10 -0.0177 0.58957   2
  -1  -6  10 0.13026 1.73845   6
  -6   1  10 -0.8778 1.38491   4
   6  -2 -10 30.6014 3.84423   6
   2   6 -10 43.4931 5.03709   6
   2   6 -10 14.1673 1.98307   2
   6  -2 -10 17.8969 3.23952   1
   6  -2 -10 18.5349 2.16025   2
  -2  -6  10 18.0232 2.21398   2
  -2  -6  10 9.63243 2.22471   5
  -6   2  10 22.0557 4.87448   6
  -2  -6  10 13.2061 2.46406   4
  -6   2  10 14.6706 3.11974   4
   3   6 -10 0.78006 1.68473   6
   6  -3 -10 -0.5185 0.41323   2
   3   6 -10 -0.0615 0.48748   2
   6  -3 -10 0.59546 0.67865   5
   6  -3 -10 0.75972 0.79958   1
  -6   3 -10 0.04327 1.26217   1
  -3  -6  10 0.03301 0.56465   2
  -6   3  10 -2.9809 2.17044   6
  -6   3  10 0.08676 0.75337   2
   6  -3  10 1.27774 1.68798   6
  -3  -6  10 -0.8751 0.60218   5
  -3  -6  10 -0.7853 0.96179   4
  -6   3  10 -1.2791 1.54344   4
   4   6 -10 106.954 9.87210   2
   6  -4 -10 116.590 10.1292   5
   6  -4 -10 119.604 9.88580   2
   6  -4 -10 114.741 10.7363   1
   6  -4  10 107.305 11.1900   6
  -6   4  10 121.351 11.2178   4
  -6   4  10 108.291 12.1725   6
  -6   4  10 113.275 10.0582   2
  -4  -6  10 95.4749 10.1140   5
  -4  -6  10 108.210 9.91369   2
   6  -5 -10 0.39039 0.55486   5
  -6   5 -10 -0.4080 0.99043   1
   5   6 -10 -0.6390 1.17967   6
   6  -5 -10 -0.2778 0.34964   2
   5   6 -10 0.13340 0.37614   2
   6  -5 -10 0.46060 0.55900   1
  -6   5  10 1.43059 2.14332   6
  -5  -6  10 -0.2307 0.53504   5
   6  -5  10 -0.5809 1.28700   6
  -6   5  10 -0.3387 1.24448   4
  -6   5  10 -0.2750 0.55389   2
  -5  -6  10 -0.2219 0.42822   2
   6  -6 -10 3.40743 0.97921   1
  -6   6 -10 0.32813 1.08550   1
   6   6 -10 10.5404 2.04765   6
   6  -6 -10 2.86782 0.52192   2
   6   6 -10 3.49145 0.64899   2
  -6   6  10 3.50579 1.97414   6
  -6   6  10 2.48428 0.73729   2
   6  -6  10 1.97154 1.40755   6
  -6   6  10 3.59119 1.47951   4
   7   6 -10 -0.5329 0.75984   6
  -6   7 -10 -0.4363 0.61866   1
   6  -7 -10 0.26270 0.35788   1
  -6   7  10 -0.3915 0.32894   2
  -6   7  10 0.83418 1.23161   6
   6  -7  10 -0.2314 0.94826   6
  -6   7  10 1.99848 1.02950   4
   7   5 -10 2.64267 0.64787   2
   7   5 -10 18.1408 2.40836   6
   5  -7 -10 5.68400 1.18865   1
   5  -7  10 3.31649 1.55212   6
  -7  -5  10 8.68998 2.33135   1
  -5   7  10 4.55548 0.89342   2
  -5   7  10 3.35588 1.89947   6
   5  -7  10 5.78155 0.88196   2
  -5   7  10 3.48981 1.45173   4
   7   4 -10 3.32166 0.60664   2
  -4   7 -10 0.28692 1.20006   1
  -4   7 -10 2.25846 0.58695   2
   4  -7 -10 3.57045 0.99655   1
   7   4 -10 12.9107 2.17683   6
  -7  -4  10 3.57889 0.68768   2
   4  -7  10 2.01233 0.62793   2
  -4   7  10 3.43025 1.75422   4
   4  -7  10 2.83461 1.62568   6
  -7  -4  10 2.74362 0.83311   5
  -4   7  10 3.35397 2.36321   6
  -7  -4  10 7.67325 2.40472   1
  -3   7 -10 16.3713 2.14371   2
   3  -7 -10 18.9843 2.58625   1
   7   3 -10 22.2905 2.13895   2
  -3   7  10 21.5010 3.88749   4
  -7  -3  10 23.8139 2.25489   2
  -7  -3  10 22.8254 2.54160   5
   3  -7  10 23.0532 3.75415   6
   3  -7  10 23.8785 2.49345   2
  -3   7  10 26.4071 5.32231   6
  -2   7 -10 2.75167 0.73668   2
  -2   7 -10 0.63697 1.45701   1
   7   2 -10 1.34847 0.56220   2
   7   2 -10 9.92296 2.37423   6
   2  -7 -10 1.34904 0.77986   1
  -7  -2  10 9.77896 3.05739   1
  -2   7  10 4.26308 2.34784   4
   2  -7  10 0.60956 1.54856   6
   2  -7  10 0.42804 1.00004   4
  -7  -2  10 5.11921 1.08609   5
  -2   7  10 0.81481 2.52190   6
   2  -7  10 2.49143 0.72212   2
  -7  -2  10 1.30166 0.65056   2
  -1   7 -10 0.32691 1.34218   1
   7   1 -10 1.67744 1.62893   6
  -1   7 -10 -0.2877 1.36461   4
   7   1 -10 0.93210 0.49004   2
   1  -7 -10 0.68381 0.66300   1
  -1   7 -10 0.37062 0.54089   2
   1  -7  10 0.71289 0.59662   2
  -1   7  10 1.54758 2.44400   6
   1  -7  10 0.33197 1.54990   6
  -7  -1  10 1.45081 0.69402   2
  -7  -1  10 2.72146 2.07614   1
   1  -7  10 1.18642 1.01186   4
  -1   7  10 2.06484 2.26385   4
   0   7 -10 0.12480 1.35575   1
   0   7 -10 0.93754 0.52619   2
   7   0 -10 0.05534 0.42856   2
   0   7 -10 2.55429 1.62374   4
   0  -7 -10 0.01588 0.50644   1
   7   0 -10 1.26339 1.43422   6
  -7   0  10 -0.5218 1.08593   4
   0  -7  10 -0.1988 1.00932   4
   0  -7  10 0.17387 1.64036   6
  -7   0  10 1.10331 0.68194   2
   0  -7  10 -0.0742 0.54656   2
  -7   0  10 0.96639 1.71261   1
   0   7  10 3.30051 2.44090   6
   0  -7  10 0.15506 1.01142   1
   1   7 -10 2.87370 1.65956   4
   7  -1 -10 5.28319 1.87399   6
   1   7 -10 2.54082 1.84111   6
   7  -1 -10 0.33245 0.50333   2
   1   7 -10 -0.0728 0.43534   2
  -7   1  10 3.60404 2.40687   1
  -1  -7  10 1.33847 0.62609   2
  -1  -7  10 0.81222 1.27754   1
  -7   1  10 2.29155 0.79623   2
  -7   1  10 0.45287 1.30453   4
  -1  -7  10 -0.9041 0.92133   4
  -1  -7  10 0.53535 0.81741   5
   2   7 -10 3.86174 1.70331   4
   2   7 -10 4.02480 1.97412   6
   7  -2 -10 3.43232 0.78926   2
   7  -2 -10 4.30290 1.71598   6
   2   7 -10 3.32781 0.70220   2
  -7   2  10 12.2741 3.52164   1
  -2  -7  10 1.45012 1.10092   4
  -7   2  10 1.98234 1.45081   4
  -7   2  10 1.34601 0.73314   2
  -2  -7  10 1.41331 0.66426   2
  -2  -7  10 2.63183 0.99527   5
   3   7 -10 23.4479 2.38398   2
   7  -3 -10 22.9067 2.33587   2
   7  -3 -10 25.2186 3.23670   1
   7  -3  10 19.9313 3.59912   6
  -3  -7  10 22.5620 2.38364   2
  -7   3  10 24.0398 3.37616   4
  -3  -7  10 19.4579 2.68518   5
   4   7 -10 9.50782 2.06157   6
   7  -4 -10 2.60011 1.09736   1
   4   7 -10 2.93056 0.67762   2
   7  -4 -10 2.81784 0.59416   2
  -7   4 -10 -0.0490 1.05512   1
  -7   4  10 1.99348 2.01602   6
  -4  -7  10 3.28379 0.65107   2
  -7   4  10 2.92856 1.40734   4
  -4  -7  10 2.03098 0.85299   5
   7  -4  10 3.60951 1.64602   6
   7  -5 -10 5.33795 1.27862   1
  -7   5 -10 0.18361 1.04403   1
   7  -5 -10 3.40161 0.56926   2
   5   7 -10 5.13719 0.71506   2
   5   7 -10 14.6911 2.16807   6
   7  -5  10 3.74035 1.41485   6
  -7   5  10 4.12446 2.00448   6
  -7   5  10 3.26126 0.71201   2
  -7   5  10 2.99847 1.29233   4
   7  -6 -10 0.05983 0.22989   2
   6   7 -10 0.14678 0.80064   6
  -7   6 -10 0.02309 0.83065   1
   7  -6 -10 -0.0001 0.46628   1
   6   7 -10 -0.2778 0.28125   2
  -7   6  10 -0.8469 0.76448   4
  -7   6  10 -0.6941 0.28124   2
   7  -6  10 0.12602 0.90389   6
   7   7 -10 2.21153 1.08269   6
  -7   7 -10 0.34051 0.70747   1
   7  -7  10 2.47528 0.95135   6
   5  -8 -10 0.23285 0.33488   1
   8   5 -10 1.04910 0.86574   6
  -5   8 -10 -0.2521 0.70251   1
  -5   8  10 0.11477 1.14813   6
  -8  -5  10 1.08656 0.99052   1
  -5   8  10 -0.0093 0.64698   2
  -5   8  10 0.65970 0.80915   4
   5  -8  10 -0.1170 0.84367   6
   5  -8  10 0.56220 0.31081   2
   8   4 -10 5.20993 1.46743   6
  -4   8 -10 1.49557 0.40793   2
   8   4 -10 1.00408 0.35807   2
   4  -8 -10 0.86898 0.52435   1
  -4   8 -10 0.24343 0.80990   1
  -4   8  10 2.54338 1.27198   4
  -4   8  10 2.09520 1.59914   6
   4  -8  10 1.40415 0.40674   2
  -8  -4  10 3.18111 1.53495   1
   4  -8  10 1.56634 1.18303   6
   8   3 -10 7.97177 1.80148   6
   3  -8 -10 2.19525 0.73448   1
   8   3 -10 2.22714 0.44682   2
  -3   8 -10 0.70343 1.14846   1
  -3   8 -10 1.64727 0.49401   2
  -8  -3  10 6.35280 2.15202   1
  -3   8  10 1.46560 1.96718   6
  -3   8  10 1.76910 1.51868   4
   3  -8  10 2.91184 1.43626   6
   3  -8  10 1.64117 0.51783   2
  -2   8 -10 1.70020 0.54195   2
  -2   8 -10 -0.0996 1.19936   1
   8   2 -10 0.65740 0.36274   2
   2  -8 -10 0.62428 0.54372   1
   8   2 -10 0.45262 1.16311   6
  -2   8  10 0.65208 1.96601   6
  -8  -2  10 0.54466 0.48201   2
   2  -8  10 1.75988 1.46559   6
  -2   8  10 -0.4588 1.50005   4
   2  -8  10 0.82832 0.48169   2
  -8  -2  10 5.81710 2.24148   1
   8   1 -10 3.86523 0.66002   2
   8   1 -10 12.9510 2.24973   6
  -1   8 -10 0.85536 1.28287   1
  -1   8 -10 4.26433 0.75858   2
  -1   8 -10 5.51047 1.48466   4
   1  -8 -10 3.82179 1.05456   1
  -8  -1  10 5.86612 1.41690   5
  -1   8  10 6.05383 2.53032   6
  -8  -1  10 4.98712 0.79891   2
   1  -8  10 2.67387 0.68942   2
   8   0 -10 12.2802 2.12744   6
   0   8 -10 6.10253 1.77849   4
   8   0 -10 6.41432 0.87672   2
   0   8 -10 5.43140 0.91188   2
   0  -8 -10 6.41768 1.30909   1
   0  -8  10 6.10823 1.82698   1
  -8   0  10 4.31043 0.88814   2
   0  -8  10 3.99366 0.87579   2
   0   8  10 6.42332 2.52779   6
   8  -1 -10 4.24172 0.76798   2
   1   8 -10 4.29722 0.79297   2
   1   8 -10 6.98845 1.73213   4
   1   8 -10 7.01157 1.97366   6
   8  -1 -10 12.9218 2.25506   6
  -8   1  10 4.28685 0.90234   2
  -1  -8  10 4.82677 0.88105   2
  -1  -8  10 3.95763 1.63876   1
   2   8 -10 0.92463 0.44838   2
   2   8 -10 0.91674 1.31658   6
   2   8 -10 1.79742 1.24700   4
   8  -2 -10 1.20056 0.44643   2
   8  -2 -10 2.33585 1.26176   6
  -2  -8  10 0.57873 0.45095   2
  -8   2  10 0.44860 0.53820   2
  -8   2  10 4.64587 2.21610   1
  -2  -8  10 0.84060 1.05446   1
  -8   3 -10 -0.0545 1.18713   1
   3   8 -10 1.66942 1.28275   6
   3   8 -10 5.13359 1.41780   4
   3   8 -10 2.39626 0.54421   2
   8  -3 -10 1.56137 0.43026   2
  -3  -8  10 2.09098 0.50144   2
  -3  -8  10 0.38684 0.96656   1
  -8   3  10 0.25748 0.44799   2
   8  -3  10 1.15811 1.15122   6
  -8   3  10 3.31435 1.17872   4
   8  -4 -10 0.97807 0.35662   2
   4   8 -10 1.71357 0.44007   2
   4   8 -10 3.80422 1.35367   6
  -8   4 -10 0.04483 0.99689   1
   4   8 -10 1.84504 1.08121   4
   8  -4  10 1.46002 1.05875   6
  -8   4  10 1.17247 0.44978   2
  -8   4  10 0.23646 0.86911   4
   8  -5 -10 0.06717 0.22814   2
   5   8 -10 0.14190 0.81471   6
  -8   5 -10 0.47750 0.83118   1
   5   8 -10 0.09990 0.73971   4
   5   8 -10 0.14666 0.31861   2
  -8   5  10 0.04856 0.29485   2
   8  -5  10 -1.2790 0.73909   6
  -8   5  10 0.37720 0.70832   4
   9   4 -10 1.73562 0.81644   6
   4  -9 -10 0.29594 0.32182   1
  -4   9  10 0.84250 0.85288   4
  -9  -4  10 1.54479 0.87456   1
  -4   9  10 0.41397 0.97617   6
   3  -9 -10 0.75505 0.41396   1
   9   3 -10 0.97750 0.78148   6
  -3   9 -10 0.37417 0.30221   2
  -3   9  10 -0.4928 1.08907   6
  -3   9  10 -0.0538 0.95982   4
  -9  -3  10 2.15804 1.08832   1
   3  -9  10 0.04440 0.24072   2
   9   2 -10 1.85110 0.95587   6
  -2   9 -10 0.40053 0.34779   2
   2  -9 -10 0.65227 0.42830   1
   9   2 -10 1.23101 0.33521   2
  -2   9  10 0.24418 1.42025   6
  -9  -2  10 0.54745 0.95404   1
   2  -9  10 0.65521 0.36364   2
  -2   9  10 0.64725 1.09190   4
   1  -9 -10 10.0133 1.33101   1
   9   1 -10 11.2696 1.13336   2
  -1   9 -10 8.47012 1.64833   4
  -1   9 -10 8.29439 1.11629   2
  -1   9  10 10.1684 2.56330   6
   1  -9  10 7.43121 1.05627   2
   9   0 -10 0.30708 0.87640   6
   9   0 -10 0.50095 0.30123   2
   0   9 -10 0.53443 0.35660   2
   0   9 -10 0.28289 0.84645   4
   0  -9 -10 0.02053 0.35069   1
   0   9  10 -0.8738 1.25701   6
  -9   0  10 0.44291 1.11529   1
   0  -9  10 0.31077 0.33515   2
   1   9 -10 11.6171 1.81031   4
   1   9 -10 10.2890 1.21592   2
   9  -1 -10 10.2287 1.14989   2
  -1  -9  10 9.05825 1.11726   2
  -1  -9  10 9.28512 1.89259   1
  -9   1  10 10.0855 1.15411   2
   2   9 -10 -0.5700 0.75468   4
   2   9 -10 0.61480 0.35924   2
   2   9 -10 0.71564 0.99473   6
   9  -2 -10 0.32571 0.25268   2
  -2  -9  10 0.53413 0.30780   2
  -9   2  10 0.71900 0.36903   2
  -9   2  10 3.18326 1.40733   1
  -2  -9  10 0.63760 0.72034   1
   3   9 -10 0.56657 0.82067   6
   9  -3 -10 0.60794 0.25735   2
   3   9 -10 0.43763 0.29989   2
   3   9 -10 -0.0365 0.73587   4
  -9   3  10 -0.0704 0.28880   2
  -3  -9  10 -0.2921 0.57324   1
   9  -4 -10 0.37226 0.22576   2
   4   9 -10 0.75820 0.70713   4
  -4  -9  10 0.37276 0.64284   1
   0   0 -11 0.35359 0.38684   5
   0   0 -11 -0.2429 1.16363   1
   0   0 -11 0.54524 0.50616   2
   0   0  11 -2.8233 2.02081   6
   0   0  11 -0.6349 1.46700   4
   1   0 -11 0.74674 1.44386   1
   0   1 -11 0.80295 1.61075   1
   1   0 -11 -0.0245 0.43482   2
   0   1 -11 -0.1005 0.38150   5
   1   0 -11 0.22507 0.44937   5
  -1   0 -11 0.21699 1.34599   1
   0  -1 -11 -0.1312 0.29293   5
   0  -1 -11 -0.5168 0.94375   1
   0   1 -11 0.03792 0.50021   2
   0   1  11 1.60450 2.75823   6
   1   0  11 -3.0760 2.16908   6
  -1   0  11 0.74879 2.47851   6
   0   1  11 2.29313 1.83225   4
   1   0  11 -1.1349 1.37687   4
  -1   0  11 -0.0959 1.61155   4
   0  -1  11 -1.5853 1.17683   4
   0  -1  11 -1.5167 2.14306   6
   1  -1 -11 0.18818 0.41930   5
  -1   1 -11 -0.2298 0.36930   5
  -1   1 -11 0.75171 1.70072   1
  -1  -1 -11 -0.3588 1.14922   1
   1  -1 -11 0.03604 0.40475   2
   1   1 -11 0.44072 0.50135   2
   1  -1 -11 0.71154 1.02979   1
  -1   1 -11 -1.1155 0.83467   2
   1   1 -11 -0.0633 0.42435   5
   1   1 -11 -0.5096 1.28478   1
  -1  -1  11 -1.2966 2.16505   6
  -1  -1  11 0.28819 1.40162   4
   1   1  11 -0.3751 2.47415   6
   1  -1  11 -2.4368 2.06536   6
  -1   1  11 -0.3432 1.57685   4
   1  -1  11 1.00670 1.33557   4
  -1   1  11 0.11014 2.44542   6
   1  -2 -11 0.96071 0.43800   5
   2   1 -11 0.61741 0.52213   5
   1  -2 -11 1.14206 1.00194   1
   2   1 -11 0.08108 1.36570   1
  -1   2 -11 0.76874 0.63576   2
  -1   2 -11 0.87143 2.05184   1
   2   1 -11 1.19818 0.59947   2
  -1   2  11 -1.1349 1.75191   4
  -2  -1  11 0.14961 1.47691   4
  -1   2  11 -0.4225 2.37916   6
  -2  -1  11 0.23438 2.52815   6
  -2  -1  11 2.65507 0.99278   2
   1  -2  11 4.16033 2.59245   6
   1  -2  11 2.62877 1.46282   4
   2   0 -11 0.87404 1.30614   1
   0   2 -11 -0.3021 1.74170   1
   0  -2 -11 -0.1545 0.19673   5
   0   2 -11 0.08941 0.46483   5
   0   2 -11 -0.3559 0.46122   2
   2   0 -11 0.66333 0.48326   2
   2   0 -11 -0.4100 0.38996   5
   0  -2 -11 0.50407 0.81984   1
  -2   0 -11 1.31623 1.74715   1
  -2   0  11 0.25084 1.63194   4
   0   2  11 0.85640 2.54016   6
   0  -2  11 1.90822 1.37860   4
  -2   0  11 1.02999 0.92344   2
  -2   0  11 -0.3002 2.46764   6
   2   0  11 -1.5851 2.35516   6
   0  -2  11 -1.5503 1.98149   6
   2  -1 -11 1.99939 0.61325   2
   2  -1 -11 1.27050 0.56898   5
   1   2 -11 1.30474 2.07612   1
   1   2 -11 1.73131 0.66951   5
   2  -1 -11 2.22136 1.27307   1
  -2   1 -11 1.74688 2.21683   1
   1   2 -11 2.76130 0.74709   2
  -1  -2  11 0.70055 0.90853   2
   2  -1  11 0.28730 1.38971   4
  -1  -2  11 1.32937 1.37755   4
  -2   1  11 4.07273 2.17973   4
   2  -1  11 3.08600 2.49658   6
  -1  -2  11 5.62431 2.67573   6
  -2   1  11 1.75915 2.91351   6
   2  -2 -11 0.07003 0.41314   2
   2  -2 -11 0.17271 0.43598   5
   2  -2 -11 0.08727 0.78874   1
   2   2 -11 -0.0686 0.52809   5
   2   2 -11 1.81956 1.96843   1
  -2   2 -11 1.58025 2.12062   1
   2   2 -11 0.36944 0.51419   2
  -2  -2  11 -0.7361 1.25856   4
  -2   2  11 -0.2633 1.86431   4
   2  -2  11 0.72552 1.28007   4
  -2   2  11 -0.5812 2.61797   6
  -2  -2  11 -0.1475 0.74817   2
  -2  -2  11 0.14112 2.27980   6
   2  -2  11 0.21364 1.98322   6
   3   2 -11 2.11877 0.68897   2
  -2   3 -11 0.60662 2.06537   1
   3   2 -11 6.79640 2.38516   6
  -2   3 -11 3.19509 0.75523   2
   3   2 -11 3.79366 0.89892   5
   2  -3 -11 3.43711 0.71271   5
   3   2 -11 0.88762 1.66845   1
   2  -3 -11 2.79945 0.62535   2
   2  -3 -11 3.08664 1.28505   1
  -3  -2  11 4.76035 1.81698   4
  -3  -2  11 1.86413 0.86277   2
   2  -3  11 0.92635 1.18621   4
  -3  -2  11 2.59689 2.07500   1
   2  -3  11 1.82635 1.93655   6
  -2   3  11 3.55823 2.15544   4
  -2   3  11 3.99283 3.22830   6
  -3  -2  11 4.54735 2.67561   6
   3   1 -11 -0.2884 0.48271   2
   3   1 -11 0.17534 0.56724   5
  -1   3 -11 0.35465 0.54943   2
   1  -3 -11 -0.3327 0.64872   1
   3   1 -11 0.22014 1.45710   1
  -1   3 -11 -0.3345 1.88211   1
   1  -3 -11 0.06977 0.29200   5
   1  -3  11 0.83604 2.09333   6
  -1   3  11 -1.2614 2.44288   6
  -3  -1  11 -0.3874 1.29935   4
  -3  -1  11 -2.3468 2.25971   6
   1  -3  11 0.79629 1.23015   4
  -1   3  11 -0.3688 1.70736   4
  -3  -1  11 0.39632 0.69764   2
   3   0 -11 -0.1449 0.52310   5
   3   0 -11 -0.1553 0.42719   2
   3   0 -11 0.17916 1.12990   1
   0   3 -11 -0.4747 1.75626   1
   0   3 -11 0.77416 0.49187   5
   0   3 -11 -0.3628 0.45699   2
   0  -3 -11 -0.2821 0.70085   1
   0  -3  11 0.97132 0.84326   2
   0  -3  11 1.27468 2.10861   6
   0   3  11 2.10772 2.65780   6
  -3   0  11 2.07781 2.91733   6
  -3   0  11 -0.0254 0.63184   2
   0  -3  11 -0.6319 1.05651   4
  -3   0  11 -1.1187 1.47272   4
   1   3 -11 -0.0101 0.44913   5
  -3   1 -11 1.26501 1.98320   1
   3  -1 -11 -0.5690 0.41623   2
   1   3 -11 -1.0193 0.43024   2
   3  -1 -11 0.42962 1.02359   1
   3  -1 -11 -0.4297 0.42655   5
   1   3 -11 -0.7887 1.58161   1
  -3   1  11 1.39619 1.77084   4
  -1  -3  11 1.15424 0.78027   2
   3  -1  11 0.12766 1.99897   6
  -1  -3  11 -0.4486 2.12593   6
  -1  -3  11 0.89231 1.33181   4
  -3   1  11 3.01451 2.98218   6
  -3   1  11 0.39876 0.85224   2
  -3   2 -11 0.31692 1.93858   1
   3  -2 -11 3.16805 1.36632   1
   2   3 -11 3.22405 0.79452   2
   2   3 -11 1.63244 2.17738   1
   3  -2 -11 2.26452 0.75281   5
   3  -2 -11 2.17054 0.65236   2
   2   3 -11 3.23581 0.87668   5
   3  -2  11 1.99721 2.12122   6
  -2  -3  11 0.74702 1.82500   1
  -2  -3  11 2.87858 0.96028   2
  -3   2  11 -1.1121 2.50644   6
  -2  -3  11 1.88458 1.48336   4
   3  -2  11 1.63539 1.44998   4
  -2  -3  11 4.94166 2.63741   6
  -3   2  11 2.08599 2.11473   4
   3   3 -11 0.78973 0.55859   5
   3  -3 -11 0.37954 0.82058   1
   3   3 -11 2.06249 1.92136   6
   3   3 -11 1.60991 1.92917   1
  -3   3 -11 -0.4587 1.82413   1
   3   3 -11 0.40828 0.53855   2
   3  -3 -11 -0.1293 0.41227   5
   3  -3 -11 -0.1375 0.40825   2
   3  -3  11 0.39547 1.81292   6
  -3  -3  11 0.18508 0.73230   2
  -3  -3  11 2.39029 1.43703   4
  -3   3  11 -1.3994 1.44016   4
  -3   3  11 1.44353 2.98640   6
  -3  -3  11 -0.5489 1.50761   1
  -3  -3  11 1.59867 2.19516   6
   3  -3  11 -1.6108 0.99950   4
   3  -4 -11 1.14470 0.88827   1
   4   3 -11 3.23252 1.96311   6
   3  -4 -11 0.93287 0.51427   5
   3  -4 -11 0.72056 0.43987   2
  -3   4 -11 0.57396 0.58926   2
  -3   4 -11 1.01415 1.74190   1
   4   3 -11 0.35711 1.67593   1
   4   3 -11 1.18045 0.60323   2
  -4  -3  11 2.31802 1.34040   4
  -3   4  11 -1.5961 1.78232   4
  -4  -3  11 0.57937 1.69356   1
   3  -4  11 0.87338 1.66148   6
  -4  -3  11 1.40163 0.86196   2
  -4  -3  11 1.69085 2.08344   6
   3  -4  11 -0.6460 1.10401   4
  -3   4  11 0.74767 3.15653   6
   4   2 -11 -1.3290 1.54035   6
   2  -4 -11 0.00585 0.31769   5
  -2   4 -11 0.83700 0.59761   2
   4   2 -11 0.66064 0.48138   2
   4   2 -11 0.48906 1.51744   1
  -2   4 -11 0.51360 1.95398   1
   2  -4 -11 -0.2057 0.61415   1
  -2   4  11 -2.0648 1.89052   4
   2  -4  11 -0.1066 1.74866   6
  -4  -2  11 1.32852 1.29865   4
  -4  -2  11 -0.9737 1.45883   1
  -4  -2  11 -0.3178 0.61100   2
  -2   4  11 4.37242 3.45288   6
   2  -4  11 -0.1849 1.03173   4
  -4  -2  11 2.25775 2.44557   6
   1  -4 -11 0.14952 0.66032   1
  -1   4 -11 0.56075 0.61968   2
   4   1 -11 0.24418 1.36889   1
  -1   4 -11 -0.5593 1.77608   1
   4   1 -11 0.38849 0.49229   2
   4   1 -11 0.16007 1.67268   6
   4   1 -11 0.85460 0.65573   5
  -4  -1  11 0.70013 2.31142   6
  -1   4  11 1.40497 2.93598   6
   1  -4  11 0.94507 1.16138   4
  -4  -1  11 0.24848 0.67252   2
   1  -4  11 0.69372 1.78425   6
  -1   4  11 -3.0196 1.84222   4
   1  -4  11 1.14579 0.88010   2
  -4  -1  11 0.38032 1.48830   4
  -4  -1  11 0.15680 1.71884   1
   0   4 -11 -0.5155 0.50482   2
   0   4 -11 0.20841 1.89145   4
   0   4 -11 1.30399 2.07452   1
   4   0 -11 0.35771 0.60278   5
   0  -4 -11 0.02143 0.67143   1
   0   4 -11 0.25199 0.46867   5
   4   0 -11 0.20145 0.47804   2
   4   0 -11 0.05812 1.20483   1
  -4   0  11 -0.5762 0.67819   2
   0  -4  11 -0.6312 1.06615   4
   0  -4  11 -0.9681 1.98723   6
   0   4  11 1.48121 2.97950   6
  -4   0  11 -0.3553 1.55336   4
  -4   0  11 -0.6976 1.94827   1
   0  -4  11 -0.2161 0.71032   2
  -4   0  11 3.09382 2.98605   6
   1   4 -11 -0.5734 1.67662   1
   4  -1 -11 1.36622 0.62528   2
   1   4 -11 0.28742 0.46125   5
   1   4 -11 0.66103 0.64917   2
   4  -1 -11 0.28724 1.05229   1
   4  -1 -11 -0.1612 0.46061   5
  -1  -4  11 0.65532 1.16944   4
  -1  -4  11 0.45724 2.01087   6
  -1  -4  11 -0.5655 0.67040   2
  -4   1  11 0.19998 0.72939   2
  -4   1  11 0.15146 1.59619   4
  -4   1  11 0.38955 2.63523   6
   4  -2 -11 0.38325 0.96441   1
   2   4 -11 -0.4709 1.81371   6
   4  -2 -11 0.28439 0.51433   2
   2   4 -11 -0.6511 1.68748   1
   4  -2 -11 0.53699 0.56554   5
   2   4 -11 0.29174 0.56634   2
   2   4 -11 -0.0348 0.54217   5
  -4   2  11 1.65294 3.15342   6
  -4   2  11 -1.5734 1.86812   4
  -4   2  11 0.50720 0.81322   2
  -2  -4  11 -0.2965 1.09065   4
   4  -2  11 -0.4980 1.58935   6
  -2  -4  11 0.10352 0.62891   2
  -2  -4  11 0.50342 1.99681   6
   3   4 -11 1.74803 1.96035   6
   4  -3 -11 1.28050 0.57481   2
   3   4 -11 0.63641 1.83097   1
   3   4 -11 1.32479 0.62714   2
  -4   3 -11 -0.9469 1.32616   1
   4  -3 -11 2.25855 0.76273   5
   4  -3 -11 0.32414 0.80850   1
  -4   3  11 0.95861 2.12978   4
  -4   3  11 2.37463 3.12032   6
  -4   3  11 0.43088 0.88766   2
  -3  -4  11 1.00622 0.80911   2
   4  -3  11 1.26093 1.22799   4
  -3  -4  11 0.95280 1.76968   1
  -3  -4  11 -0.4262 1.06511   4
  -3  -4  11 0.36834 1.92939   6
   4  -3  11 0.57205 1.72805   6
   4  -4 -11 0.00412 0.43632   5
  -4   4 -11 -0.3114 1.29340   1
   4  -4 -11 -0.3012 0.38380   2
   4   4 -11 0.16387 0.47086   2
   4   4 -11 -0.3904 1.61623   6
   4  -4 -11 -0.3918 0.56936   1
  -4   4  11 0.95157 2.76194   6
  -4  -4  11 0.30176 1.46888   1
  -4  -4  11 -0.8066 0.73967   5
  -4  -4  11 -0.4207 0.57792   2
  -4   4  11 1.72895 1.89980   4
   4  -4  11 1.58351 1.74388   6
  -4  -4  11 -0.0985 1.01276   4
  -4   4  11 0.21074 0.83398   2
   4  -4  11 -0.1212 1.13292   4
   5   4 -11 0.22917 0.44205   2
  -4   5 -11 -0.2357 1.31477   1
   4  -5 -11 0.72472 0.75121   1
   5   4 -11 1.53825 1.54173   6
   4  -5 -11 0.65213 0.39798   2
   4  -5 -11 0.22958 0.42513   5
  -4   5  11 3.24452 2.16875   4
   4  -5  11 1.73106 1.77403   6
  -4   5  11 1.27269 0.92649   2
   4  -5  11 -0.9665 0.85231   4
  -5  -4  11 0.97082 1.40925   1
  -4   5  11 1.30128 2.63434   6
  -5  -4  11 1.53327 1.12983   4
  -5  -4  11 0.59581 0.58090   2
   4  -5  11 0.57702 1.75831   6
  -5  -4  11 0.01436 0.76911   5
   5   3 -11 0.25584 1.39107   6
  -3   5 -11 0.91682 1.58264   1
   3  -5 -11 0.04500 0.34457   5
   5   3 -11 0.22866 0.42191   2
  -3   5 -11 -0.0259 0.52438   2
   3  -5 -11 0.19217 0.60038   1
  -5  -3  11 -0.8035 0.58853   2
  -3   5  11 -0.3443 2.78051   6
   3  -5  11 -0.5691 1.02724   4
  -3   5  11 -4.1555 1.80106   4
   3  -5  11 -0.2526 1.42154   6
  -5  -3  11 -0.3549 0.76734   5
  -5  -3  11 -1.0144 1.31122   1
  -5  -3  11 -0.2773 1.02414   4
   5   2 -11 -0.3290 1.46917   1
   2  -5 -11 0.61392 0.73220   1
   5   2 -11 2.12564 1.73964   6
  -2   5 -11 -0.4308 1.46752   1
   5   2 -11 0.51171 0.45491   2
  -2   5 -11 0.75766 0.59564   2
   2  -5 -11 0.33029 0.18885   5
   2  -5  11 1.29179 1.82403   6
  -5  -2  11 2.01129 2.14661   6
  -5  -2  11 1.13094 0.75018   2
  -2   5  11 0.93953 2.16915   4
  -5  -2  11 -0.7501 1.09218   4
   2  -5  11 0.98501 0.71082   2
   2  -5  11 3.91858 1.45718   4
  -5  -2  11 -0.0790 1.52563   1
  -2   5  11 -3.1805 2.70233   6
  -1   5 -11 1.01382 1.85068   1
   5   1 -11 -0.0554 0.43212   2
  -1   5 -11 -0.2911 0.45502   2
   1  -5 -11 -0.2696 0.59902   1
   5   1 -11 -0.5868 1.21043   1
   5   1 -11 0.74173 1.57869   6
  -5  -1  11 -1.9965 2.05439   6
  -5  -1  11 -0.4927 1.56855   1
   1  -5  11 -0.9992 1.03350   4
  -5  -1  11 1.00344 1.32447   4
  -5  -1  11 -0.6683 0.62381   2
   1  -5  11 0.79932 0.66554   2
  -1   5  11 0.54148 2.08909   4
  -1   5  11 -1.0388 2.87700   6
   1  -5  11 -1.0836 1.56623   6
   0   5 -11 0.91865 0.59530   2
   5   0 -11 -0.0813 0.45884   2
   5   0 -11 -0.3662 1.57079   6
   0   5 -11 1.14809 1.66795   4
   0  -5 -11 -0.0993 0.61372   1
   5   0 -11 -0.4252 1.06374   1
   5   0 -11 0.47282 0.58003   5
   0  -5  11 3.02710 1.43673   4
  -5   0  11 -1.0979 2.27391   6
   0   5  11 -3.2014 2.39438   6
   0  -5  11 -0.2860 0.65801   2
  -5   0  11 -2.0683 1.31263   4
   0  -5  11 0.99785 1.87129   6
  -5   0  11 0.40116 0.74097   2
  -5   0  11 -0.6777 1.59747   1
   1   5 -11 -0.4459 1.75752   1
   5  -1 -11 -0.0466 0.46679   2
   5  -1 -11 0.49716 0.65718   5
   1   5 -11 -0.1206 0.48302   5
   5  -1 -11 0.51370 1.06206   1
   1   5 -11 -0.5939 0.47412   2
  -5   1  11 0.88551 2.73224   6
  -1  -5  11 0.48465 0.69207   2
  -1  -5  11 1.80097 1.28025   4
  -5   1  11 1.35385 1.70202   4
  -1  -5  11 -2.0408 1.67103   6
  -5   1  11 -0.5589 0.66257   2
   2   5 -11 0.42582 0.56875   2
   5  -2 -11 0.41335 0.53369   2
  -5   2 -11 0.12902 1.46245   1
   5  -2 -11 1.84956 0.77141   5
   2   5 -11 -0.3463 1.66000   1
   5  -2 -11 1.20486 1.11473   1
   2   5 -11 1.39849 1.85222   6
  -5   2  11 -0.2226 1.67421   4
  -5   2  11 0.10710 0.86322   2
  -5   2  11 -0.7015 2.68419   6
  -2  -5  11 1.74234 1.23060   4
  -2  -5  11 1.11050 1.86379   6
  -2  -5  11 0.04047 0.68462   2
   5  -2  11 0.72383 1.79446   6
   3   5 -11 0.43147 1.70449   6
   5  -3 -11 -0.0765 0.45149   2
  -5   3 -11 0.34912 1.47148   1
   5  -3 -11 0.38099 0.80018   1
   5  -3 -11 0.72397 0.64446   5
   3   5 -11 0.30387 0.50164   2
  -5   3  11 -0.5409 0.67993   2
   5  -3  11 0.22894 1.11170   4
  -3  -5  11 -0.2907 0.85920   5
  -3  -5  11 -0.0612 0.59967   2
  -5   3  11 -0.0264 2.59453   6
  -5   3  11 -1.5393 1.76897   4
  -3  -5  11 -0.1145 1.01255   4
   5  -3  11 0.66040 1.55563   6
   5  -4 -11 1.17064 0.49484   2
  -5   4 -11 -0.3240 1.20644   1
   4   5 -11 0.90057 0.52079   2
   4   5 -11 2.22980 1.66145   6
   5  -4 -11 0.76830 0.82319   1
   5  -4 -11 1.12480 0.58265   5
  -5   4  11 0.65615 1.74364   4
   5  -4  11 -0.2860 1.33600   6
  -5   4  11 0.59977 0.74229   2
  -4  -5  11 1.33783 0.68932   2
  -4  -5  11 0.41914 1.64238   1
  -4  -5  11 0.76676 0.82116   5
   5  -4  11 -0.1038 1.03099   4
  -4  -5  11 1.02001 1.05540   4
  -5   4  11 2.70187 2.71052   6
   5  -4  11 1.97499 1.80782   6
   5   5 -11 -0.0973 1.28633   6
  -5   5 -11 -0.2300 1.24211   1
   5  -5 -11 0.12739 0.55920   1
   5  -5 -11 0.54374 0.45206   5
   5  -5 -11 -0.0665 0.32085   2
   5   5 -11 0.35776 0.43869   2
  -5  -5  11 -0.2307 1.15421   1
   5  -5  11 -0.3542 1.30308   6
  -5  -5  11 -0.9215 0.57215   5
  -5   5  11 -2.7449 1.15812   4
  -5  -5  11 0.17980 0.49894   2
  -5   5  11 -0.0455 2.12889   6
  -5   5  11 0.80824 0.66493   2
  -5   6 -11 0.75550 1.14528   1
   5  -6 -11 -0.1477 0.40509   1
   6   5 -11 -0.1304 0.31850   2
   6   5 -11 0.30521 1.13585   6
  -5   6  11 -0.6693 1.05360   4
  -6  -5  11 -0.0818 0.39171   2
   5  -6  11 -1.1217 1.12306   6
  -6  -5  11 0.18824 1.02141   1
  -5   6  11 0.34421 0.63168   2
  -5   6  11 0.25887 1.76956   6
   6   4 -11 0.35579 1.18921   6
  -4   6 -11 -0.5755 1.06162   1
   4  -6 -11 0.06282 0.27280   5
   4  -6 -11 -0.0325 0.43817   1
   6   4 -11 0.41645 0.39749   2
  -6  -4  11 0.38891 1.21967   1
  -6  -4  11 0.47794 0.70439   5
  -4   6  11 -2.4034 1.88618   6
  -6  -4  11 0.02276 0.48321   2
   4  -6  11 0.56752 1.52069   6
  -4   6  11 -0.6494 1.47637   4
  -3   6 -11 -0.0692 1.26103   1
   6   3 -11 0.05543 0.38329   2
  -3   6 -11 -0.1324 0.46601   2
   6   3 -11 0.91822 1.42125   6
   3  -6 -11 0.23816 0.55959   1
  -6  -3  11 0.61541 0.70698   5
  -6  -3  11 0.99448 1.48918   1
   3  -6  11 0.65869 1.02594   4
   3  -6  11 -1.4677 1.45210   6
   3  -6  11 -0.1705 0.52036   2
  -3   6  11 0.92382 1.90689   4
  -3   6  11 -0.9522 2.23613   6
  -6  -3  11 -0.7650 0.44842   2
   6   2 -11 -0.0874 0.36250   2
   6   2 -11 0.14112 1.35277   6
   2  -6 -11 -0.4867 0.44904   1
  -2   6 -11 0.61452 1.59501   1
  -2   6 -11 -0.3881 0.44003   2
   2  -6  11 -0.1770 0.94773   4
  -2   6  11 -1.6868 2.25149   6
  -6  -2  11 -1.2500 0.66815   5
   2  -6  11 0.07023 1.55170   6
  -2   6  11 -2.9364 1.82467   4
   2  -6  11 1.09255 1.68159   6
  -6  -2  11 1.09635 1.12496   4
  -6  -2  11 -0.5212 1.28127   1
  -6  -2  11 -0.2166 0.52182   2
   2  -6  11 0.15204 0.58489   2
  -1   6 -11 -0.6233 1.23047   1
  -1   6 -11 -0.1887 0.44740   2
   1  -6 -11 0.20597 0.63552   1
   6   1 -11 0.18960 0.43054   2
   6   1 -11 0.28126 1.47481   6
  -6  -1  11 0.25197 1.54719   1
  -6  -1  11 -0.6776 1.03398   4
   1  -6  11 -0.5250 0.57209   2
  -1   6  11 2.98659 3.18340   4
  -6  -1  11 0.37436 0.58017   2
  -1   6  11 1.14606 2.67428   6
   1  -6  11 -0.4073 0.95624   4
   1  -6  11 0.90206 1.73289   6
   6   0 -11 -0.4869 0.39744   2
   0  -6 -11 -0.1751 0.52735   1
   0   6 -11 0.45188 0.52627   2
   0   6 -11 -0.4111 1.38552   1
   6   0 -11 0.73082 1.61349   6
   0   6 -11 1.08127 1.58556   4
   6   0 -11 -0.1922 1.08849   1
  -6   0  11 -0.0646 0.63470   2
  -6   0  11 -1.3734 1.21691   4
   0   6  11 0.95600 2.58412   6
  -6   0  11 0.06116 1.70241   1
   0  -6  11 -1.2599 0.87947   4
   0  -6  11 0.73533 1.68476   6
   0  -6  11 -0.7123 0.57731   2
  -6   0  11 -0.6916 2.12418   6
   6  -1 -11 0.33172 0.99521   1
   6  -1 -11 0.62548 0.51718   2
   1   6 -11 -0.5390 1.41517   4
   6  -1 -11 -0.8751 1.46403   6
   1   6 -11 0.94976 0.57299   2
   1   6 -11 0.04011 1.47886   1
  -6   1  11 -0.0961 1.40968   4
  -6   1  11 -0.3140 1.69907   1
  -6   1  11 0.42837 0.72251   2
  -1  -6  11 -0.1628 1.15535   1
  -6   1  11 1.77887 2.40620   6
  -1  -6  11 0.44164 1.10191   4
  -1  -6  11 0.48273 0.62533   2
  -1  -6  11 -1.4491 1.43659   6
   2   6 -11 -0.1504 1.39460   1
   6  -2 -11 -0.6963 0.41209   2
   2   6 -11 -0.1828 1.50090   6
   6  -2 -11 0.38172 0.64757   5
   2   6 -11 0.35674 0.54603   2
   6  -2 -11 -0.0889 0.84934   1
  -6   2 -11 0.73356 2.36808   1
  -2  -6  11 -0.4851 0.52638   2
  -2  -6  11 -0.4034 0.99363   4
  -6   2  11 -0.8186 0.63473   2
  -6   2  11 -1.0819 2.13522   6
  -6   2  11 0.94247 1.51090   4
  -6   3 -11 0.53998 1.26609   1
   3   6 -11 0.25570 0.40151   2
   3   6 -11 -0.9922 1.36170   6
   6  -3 -11 -0.7158 0.50483   5
   6  -3 -11 -0.2763 0.40258   2
   6  -3 -11 -0.3860 0.68796   1
  -3  -6  11 0.47974 0.58965   2
  -3  -6  11 0.05154 0.74361   5
  -6   3  11 -0.1658 1.49954   4
  -3  -6  11 0.81572 0.98920   4
   6  -3  11 -1.4284 1.41693   6
  -6   3  11 -0.7846 0.59149   2
  -6   3  11 -0.5312 2.24410   6
   6  -4 -11 -0.3339 0.35451   2
   6  -4 -11 -0.0860 0.51115   5
   4   6 -11 -0.6453 1.20367   6
   4   6 -11 -0.1790 0.35628   2
  -6   4 -11 -0.1173 1.10262   1
   6  -4 -11 0.63203 0.69795   1
  -4  -6  11 0.45498 0.50158   2
  -6   4  11 0.22658 1.93441   6
   6  -4  11 -1.0535 1.21748   6
  -4  -6  11 -0.3730 0.62898   5
  -6   4  11 -0.2995 1.37038   4
   6  -5 -11 -0.3145 0.26997   2
  -6   5 -11 0.08921 1.04570   1
   5   6 -11 -1.5897 0.99462   6
   6  -5 -11 0.23858 0.60195   1
   5   6 -11 -0.4944 0.31047   2
  -6   5  11 -0.2691 1.17738   4
  -5  -6  11 -0.5676 0.36121   2
   6  -5  11 -0.6682 1.15336   6
  -6   5  11 1.30123 1.73202   6
  -6   5  11 -0.0404 0.56404   2
   6  -6 -11 -0.2051 0.39384   1
  -6   6 -11 -0.1865 0.87366   1
   6  -6 -11 -0.4495 0.37197   2
   6   6 -11 0.03185 0.29101   2
   6   6 -11 -0.4039 0.86383   6
   6  -6  11 0.39854 1.10979   6
  -6   6  11 -0.0432 0.41782   2
  -6   6  11 -0.4381 0.90504   4
  -6   6  11 0.60480 1.36603   6
   6  -7 -11 0.07202 0.38654   1
  -6   7 -11 -0.3106 0.66199   1
   7   6 -11 -0.5138 0.66519   6
  -6   7  11 -0.1861 0.73186   4
   6  -7  11 0.83537 0.88732   6
  -6   7  11 0.47343 0.96746   6
  -5   7 -11 -0.0582 0.77154   1
   7   5 -11 -0.0768 0.27880   2
   7   5 -11 0.19195 0.86488   6
   5  -7 -11 0.02734 0.35060   1
   5  -7  11 0.25792 0.41119   2
  -5   7  11 0.19666 0.89663   4
  -5   7  11 0.22846 1.33293   6
   5  -7  11 0.46945 0.98137   6
  -5   7  11 0.09683 0.46292   2
  -7  -5  11 0.74056 0.93825   1
   7   4 -11 0.18695 0.31565   2
   4  -7 -11 0.29387 0.48599   1
  -4   7 -11 0.08869 1.03930   1
   7   4 -11 3.29377 1.33490   6
  -4   7  11 1.44516 1.34150   4
   4  -7  11 0.75278 1.32147   6
  -7  -4  11 0.09883 0.43326   2
   4  -7  11 0.48200 0.43922   2
  -4   7  11 -0.9539 1.61762   6
  -7  -4  11 0.27292 1.04040   1
   7   3 -11 0.02325 1.06109   6
   7   3 -11 0.06038 0.33408   2
  -3   7 -11 0.00228 0.41903   2
  -3   7 -11 0.44410 0.99270   1
   3  -7 -11 0.09078 0.42459   1
  -3   7  11 0.02940 1.51770   4
   3  -7  11 -0.2870 0.42729   2
  -7  -3  11 -0.5607 1.01013   1
  -7  -3  11 -0.1328 0.43644   2
   3  -7  11 -0.6808 1.24355   6
  -3   7  11 -2.0446 1.73668   6
   7   2 -11 1.38601 1.32606   6
  -2   7 -11 -0.0461 1.14168   1
   7   2 -11 0.31176 0.39585   2
  -2   7 -11 -0.1870 0.45007   2
   2  -7 -11 0.52981 0.56148   1
   2  -7  11 0.12349 0.50857   2
   2  -7  11 -0.1557 1.36947   6
  -7  -2  11 -0.0659 0.48095   2
   2  -7  11 0.54914 0.85591   4
  -2   7  11 -0.3903 1.63226   4
  -2   7  11 -2.1768 1.88302   6
  -7  -2  11 2.06846 1.61924   1
  -7  -2  11 1.14081 0.73421   5
  -1   7 -11 -0.6286 0.40696   2
   1  -7 -11 -0.2890 0.39893   1
   7   1 -11 0.17121 0.38107   2
  -1   7 -11 -0.2398 1.17623   1
   7   1 -11 -0.4588 1.22915   6
  -1   7  11 -0.7766 1.99743   6
   1  -7  11 0.23743 0.49039   2
  -7  -1  11 0.35112 1.45607   1
   1  -7  11 0.53531 0.96729   4
  -7  -1  11 -0.2887 0.48787   2
   1  -7  11 -0.9842 1.42182   6
   0   7 -11 -0.7329 1.13237   4
   7   0 -11 -0.1146 0.34192   2
   0   7 -11 -0.5313 1.12910   1
   0  -7 -11 0.40117 0.53184   1
   7   0 -11 1.13060 1.41507   6
   0   7 -11 -0.1466 0.42112   2
   0   7  11 0.16595 2.07971   6
  -7   0  11 -0.0069 1.41695   1
   0  -7  11 -0.5140 0.85858   4
   0  -7  11 -0.4856 1.49045   6
  -7   0  11 -0.7237 0.44603   2
   0  -7  11 -0.8280 0.42309   2
  -7   0  11 -0.5570 0.99184   4
   1   7 -11 -0.5805 1.24175   4
   7  -1 -11 -0.4898 1.19991   6
   1   7 -11 0.13254 0.44876   2
   7  -1 -11 -0.8640 0.32806   2
  -1  -7  11 -0.0181 0.45788   2
  -7   1  11 -0.9111 1.08968   4
  -1  -7  11 -0.3634 0.88189   4
  -1  -7  11 0.70728 1.14210   1
  -7   1  11 -0.1972 0.48469   2
  -7   1  11 -0.0244 1.45453   1
   2   7 -11 1.53959 1.48030   4
   2   7 -11 -1.3250 1.27834   6
   2   7 -11 -0.1595 0.36446   2
   7  -2 -11 -0.3808 0.34057   2
  -2  -7  11 1.81798 0.85834   5
  -7   2  11 -0.5336 1.11184   4
  -2  -7  11 -0.5809 1.01747   1
  -2  -7  11 1.21420 0.57101   2
  -2  -7  11 -0.8035 0.87195   4
  -7   2  11 -0.0498 0.50337   2
   3   7 -11 -0.6019 0.31645   2
   3   7 -11 0.78781 1.23248   4
   3   7 -11 -0.4913 1.32880   6
   7  -3 -11 0.21856 0.37599   2
  -7   3 -11 0.35102 1.28498   1
   7  -3 -11 -0.1067 0.77026   1
  -7   3  11 0.84013 1.11729   4
  -7   3  11 -0.0353 0.45534   2
  -3  -7  11 0.25173 0.49570   2
   7  -3  11 -0.8533 1.16011   6
   7  -4 -11 0.55468 0.78364   1
  -7   4 -11 0.83474 1.20417   1
   4   7 -11 1.09282 1.22855   6
   4   7 -11 3.15608 1.26732   4
   4   7 -11 0.15683 0.37728   2
   7  -4 -11 1.15236 0.39001   2
  -7   4  11 0.09035 0.48509   2
   7  -4  11 1.28561 1.29242   6
  -7   4  11 -0.8316 0.87647   4
  -4  -7  11 0.75199 0.41868   2
   5   7 -11 -0.2258 0.80952   6
   7  -5 -11 -0.0480 0.22638   2
  -7   5 -11 -0.3896 0.83639   1
   7  -5 -11 -0.0844 0.52636   1
   5   7 -11 -0.0126 0.30371   2
  -7   5  11 0.80937 0.84442   4
  -7   5  11 0.05722 0.36328   2
   7  -5  11 -0.1667 0.94588   6
   6   7 -11 0.42054 0.79291   4
   6   7 -11 -0.4281 0.65554   6
  -7   6 -11 -0.7496 0.64235   1
  -7   6  11 -0.1245 0.59897   4
   7  -6  11 0.41025 0.81515   6
  -7   6  11 -0.0596 0.30407   2
   8   5 -11 0.69534 0.94194   6
  -5   8 -11 -0.0023 0.70630   1
   5  -8 -11 -0.1930 0.26741   1
  -5   8  11 0.00180 0.72282   4
  -5   8  11 -0.2015 1.01673   6
   8   4 -11 -0.1679 0.23974   2
   4  -8 -11 -0.1304 0.29584   1
  -4   8 -11 -0.1067 0.71769   1
   8   4 -11 -0.1965 0.77872   6
  -4   8  11 0.27854 0.89571   4
  -4   8  11 0.69245 1.21637   6
   4  -8  11 -0.7364 0.96249   6
   4  -8  11 -0.1370 0.27663   2
  -8  -4  11 -0.1261 0.75635   1
  -3   8 -11 0.27956 0.85492   1
  -3   8 -11 0.39004 0.31832   2
   8   3 -11 1.63043 1.08720   6
   8   3 -11 0.42587 0.27482   2
   3  -8 -11 0.26888 0.38744   1
  -8  -3  11 0.78813 1.02438   1
  -3   8  11 0.55458 1.44871   6
   3  -8  11 0.73389 1.15086   6
   3  -8  11 0.53200 0.36932   2
  -3   8  11 1.90733 1.26094   4
   8   2 -11 0.07349 0.93253   6
   2  -8 -11 0.03857 0.37190   1
   8   2 -11 0.50368 0.32196   2
  -2   8 -11 -0.6607 0.78422   1
  -2   8 -11 -0.3410 0.30813   2
   2  -8  11 0.50846 0.43120   2
  -8  -2  11 -0.2413 0.37750   2
  -2   8  11 -0.9863 1.13620   4
  -8  -2  11 -0.0229 0.86578   1
  -2   8  11 -1.1729 1.49942   6
   2  -8  11 -1.1720 1.11081   6
   8   1 -11 3.02331 1.27629   6
   1  -8 -11 1.28812 0.62540   1
   8   1 -11 1.48373 0.42627   2
  -1   8 -11 0.77002 0.49759   2
  -1   8 -11 0.33031 1.02506   1
   1  -8  11 1.24831 0.49500   2
  -8  -1  11 0.17705 0.46717   2
  -1   8  11 1.27444 1.85501   6
  -8  -1  11 1.22385 1.33634   1
   8   0 -11 -0.1057 1.01989   6
   0   8 -11 0.12948 1.08728   4
   0  -8 -11 -0.0753 0.39109   1
   8   0 -11 -0.3195 0.25618   2
   0   8 -11 -0.2431 0.35589   2
  -8   0  11 0.18868 1.14846   1
  -8   0  11 -0.2239 0.43660   2
   0  -8  11 -0.0112 0.37022   2
   0   8  11 -1.4359 1.37806   6
   1   8 -11 1.41996 1.11564   4
   8  -1 -11 1.06470 0.39840   2
   1   8 -11 0.75805 0.39542   2
   8  -1 -11 4.23916 1.40518   6
  -1  -8  11 1.42064 0.50334   2
  -8   1  11 0.62312 0.44873   2
  -8   1  11 3.52953 1.87623   1
   2   8 -11 -0.3536 0.28254   2
   2   8 -11 -1.0802 0.89729   4
   2   8 -11 0.27550 1.14047   6
   8  -2 -11 0.00920 0.31226   2
  -8   2  11 0.48413 0.44327   2
  -2  -8  11 0.02753 0.37660   2
  -2  -8  11 0.30520 0.81760   1
   3   8 -11 0.26235 0.90814   4
   3   8 -11 0.13689 0.96093   6
   8  -3 -11 0.05618 0.26165   2
   3   8 -11 0.38775 0.33635   2
  -8   3  11 0.73655 0.42146   2
  -3  -8  11 0.43462 0.80733   1
  -8   3  11 0.78622 1.29851   4
  -3  -8  11 0.20192 0.32963   2
  -8   4 -11 -0.2468 0.88912   1
   8  -4 -11 0.11564 0.21918   2
   4   8 -11 -0.8009 0.73636   4
   4   8 -11 -0.5347 0.78788   6
   4   8 -11 0.08642 0.27711   2
  -8   4  11 0.34834 0.73444   4
  -4  -8  11 0.16980 0.69772   1
   8  -4  11 -0.1673 0.85694   6
  -8   4  11 0.21869 0.31242   2
   5   8 -11 0.27624 0.64720   4
  -5  -8  11 -0.3748 0.63090   1
  -8   5  11 0.04370 0.30961   2
   3  -9 -11 -0.1080 0.25644   1
  -3   9  11 -0.0235 1.27386   6
  -9  -3  11 -0.3644 0.77148   1
  -2   9 -11 0.24137 0.26979   2
   9   2 -11 0.54274 0.76558   6
   2  -9 -11 0.16990 0.33016   1
  -9  -2  11 0.29089 0.79440   1
  -2   9  11 -0.3230 1.03721   6
   2  -9  11 -0.0047 0.24528   2
   9   1 -11 -0.5190 0.73430   6
   1  -9 -11 0.02423 0.32888   1
  -1   9 -11 -0.0603 0.27612   2
   9   1 -11 0.44456 0.24089   2
  -1   9  11 -0.7207 1.09529   6
  -9  -1  11 0.49038 0.83255   1
   1  -9  11 -0.0850 0.26461   2
   9   0 -11 0.24651 0.77200   6
   9   0 -11 0.03577 0.24636   2
   0   9 -11 0.54359 0.94103   4
   0   9 -11 -0.2585 0.27281   2
   0  -9  11 -0.3742 0.25855   2
  -9   0  11 0.14545 0.86085   1
   1   9 -11 -0.2370 0.25658   2
   9  -1 -11 -0.0396 0.19626   2
   1   9 -11 -0.5924 0.73598   4
  -9   1  11 -0.2766 0.85801   1
  -1  -9  11 -0.3606 0.25488   2
  -9   1  11 0.31540 0.38697   2
   2   9 -11 0.03749 0.25789   2
   2   9 -11 0.94383 0.76209   4
   9  -2 -11 0.08641 0.20366   2
   0   0 -12 1384.21 117.360   5
   0   0 -12 1397.13 119.771   1
   0   0  12 1360.66 119.912   6
   0   0  12 1306.94 118.221   4
  -1   0 -12 0.14947 1.41838   1
   1   0 -12 -0.1657 0.35600   5
   0   1 -12 0.03949 0.37877   5
   0   1 -12 0.24408 1.60628   1
   0   1 -12 1.35599 0.55472   2
   1   0 -12 -0.2882 0.41077   2
   1   0 -12 -0.4522 1.14146   1
   0  -1 -12 0.71008 0.29398   5
   0  -1 -12 -0.4669 0.99011   1
  -1   0  12 1.18025 1.62351   4
  -1   0  12 0.50329 2.38546   6
   0  -1  12 2.04486 2.53822   6
   0  -1  12 0.85457 1.31817   4
   1   0  12 -0.4807 1.32831   4
   0   1  12 2.12435 1.67769   4
   0   1  12 -0.0508 2.31025   6
   1   0  12 0.45619 2.24808   6
  -1  -1 -12 457.394 40.4752   1
   1  -1 -12 505.200 38.5488   5
   1   1 -12 436.438 41.1633   1
   1  -1 -12 452.183 40.2795   1
   1   1 -12 413.268 38.4259   2
  -1   1 -12 423.291 41.3728   1
   1  -1 -12 393.519 38.3217   2
   1   1 -12 492.208 38.6568   5
  -1   1  12 405.105 40.9906   6
  -1  -1  12 456.008 39.5181   4
  -1  -1  12 464.704 41.1798   6
   1  -1  12 450.443 40.7887   6
   1  -1  12 485.691 39.4247   4
  -1   1  12 420.687 39.5417   4
   1   1  12 411.513 40.6412   6
   1  -2 -12 9.74167 1.02285   5
   2   1 -12 7.32008 1.12823   2
   2   1 -12 6.30452 2.64921   1
   1  -2 -12 5.99874 1.94858   1
  -1   2 -12 6.30713 1.09015   2
  -1   2 -12 4.10809 2.82329   1
   2   1 -12 8.63683 1.25100   5
   1  -2  12 9.32684 2.23534   4
  -2  -1  12 6.18761 1.35674   2
  -2  -1  12 10.7372 3.75885   6
  -1   2  12 6.70117 2.23308   4
  -2  -1  12 8.45972 2.30954   4
   1  -2  12 6.38682 2.84259   6
  -1   2  12 3.19683 3.03007   6
   0   2 -12 303.538 26.4265   2
   0   2 -12 260.168 29.2275   1
   0  -2 -12 318.009 27.8746   1
   2   0 -12 292.278 26.3867   2
   2   0 -12 329.702 28.7620   1
  -2   0 -12 280.307 28.8246   1
   0   2 -12 309.166 26.5427   5
   2   0 -12 350.580 26.6408   5
   0  -2  12 318.857 28.8577   6
   0  -2  12 329.925 27.4201   4
   2   0  12 321.674 28.6102   6
  -2   0  12 338.915 27.7521   4
  -2   0  12 337.050 29.5251   6
  -2   0  12 254.217 26.5933   2
   0   2  12 244.854 28.3990   6
   1   2 -12 7.10086 1.14547   2
   1   2 -12 6.69847 1.14529   5
   2  -1 -12 8.49797 2.47402   1
   2  -1 -12 8.85093 1.23240   5
   2  -1 -12 7.06118 1.03951   2
   1   2 -12 8.04799 3.25390   1
  -2   1 -12 5.76195 2.94895   1
  -1  -2 -12 8.41251 2.32721   1
  -2   1  12 9.73068 3.70925   6
  -1  -2  12 6.09668 3.27426   6
  -1  -2  12 5.01581 1.85820   4
  -2   1  12 3.95049 2.13619   4
   2  -1  12 8.33151 2.01007   4
   2  -1  12 8.86673 3.15151   6
  -1  -2  12 8.75100 1.63149   2
   2  -2 -12 165.883 16.2225   2
   2  -2 -12 194.464 17.8168   1
   2   2 -12 201.127 16.5601   5
   2   2 -12 172.040 19.0431   1
   2   2 -12 193.050 16.4227   2
   2  -2 -12 205.601 16.4223   5
  -2  -2  12 196.513 18.8467   6
   2  -2  12 204.866 18.5571   6
  -2  -2  12 180.213 16.6355   2
  -2   2  12 163.611 17.4419   4
   2  -2  12 188.322 17.1037   4
  -2   2  12 157.238 18.8743   6
  -2  -2  12 196.256 17.3480   4
   2  -3 -12 7.28564 1.95810   1
   3   2 -12 7.16022 1.23139   5
   3   2 -12 6.60008 1.12576   2
   2  -3 -12 7.60164 0.97432   5
   3   2 -12 5.23136 2.56753   1
  -2   3 -12 6.12438 2.91731   1
  -3  -2  12 7.43868 2.15277   4
  -2   3  12 8.33378 3.78274   6
  -3  -2  12 2.49062 2.53719   6
   2  -3  12 6.59021 1.93183   4
   2  -3  12 6.53047 2.81949   6
  -2   3  12 8.59124 2.74716   4
  -3  -2  12 7.13842 1.41062   2
   3   1 -12 82.1588 7.08352   2
  -1   3 -12 78.5187 7.04393   2
   1  -3 -12 77.7763 8.07986   1
   1  -3 -12 71.1058 6.73004   5
   3   1 -12 81.9198 9.41250   1
   3   1 -12 92.7667 7.27356   5
  -1   3 -12 50.2040 9.99168   1
  -1   3  12 76.0200 10.8900   6
  -3  -1  12 94.0456 10.0655   6
  -3  -1  12 73.3906 7.28177   2
   1  -3  12 81.9458 7.89838   4
   1  -3  12 81.1868 9.12263   6
  -3  -1  12 92.4615 8.33343   4
  -1   3  12 90.4612 9.23280   4
   3   0 -12 -0.3463 1.12306   1
   0   3 -12 -0.1259 0.44262   5
   3   0 -12 -0.5654 0.46188   5
   0  -3 -12 0.30991 0.79023   1
   0   3 -12 0.04335 0.51609   2
   0   3 -12 -0.3541 1.70821   1
   3   0 -12 1.03694 0.53067   2
  -3   0  12 0.21502 0.73920   2
  -3   0  12 1.34339 1.70466   4
  -3   0  12 -2.1461 2.30487   6
   0   3  12 0.93776 2.42375   6
   0  -3  12 0.45149 0.88254   2
   0  -3  12 0.10388 1.15473   4
   0  -3  12 0.19033 2.02003   6
   1   3 -12 85.8764 7.65524   5
   3  -1 -12 75.7060 7.47244   2
   3  -1 -12 87.9678 7.66765   5
   3  -1 -12 88.0645 9.25597   1
   1   3 -12 89.4296 7.61306   2
   1   3 -12 58.5331 9.72679   1
  -3   1  12 100.757 12.4768   6
   3  -1  12 98.4410 9.63098   6
  -1  -3  12 76.1252 7.77852   2
  -1  -3  12 91.6160 8.50594   4
  -1  -3  12 90.1767 9.83997   6
  -3   1  12 87.9597 8.88741   4
   2   3 -12 7.82979 1.26524   5
   2   3 -12 5.58628 2.87357   1
   2   3 -12 5.49176 1.07516   2
   3  -2 -12 7.31976 1.02875   2
   3  -2 -12 6.68321 1.09830   5
  -3   2 -12 4.57291 2.74354   1
   3  -2 -12 6.16836 1.95818   1
  -3   2  12 6.32696 2.49973   4
   3  -2  12 6.70920 1.88754   4
  -3   2  12 3.68886 1.33872   2
  -3   2  12 3.72947 3.26565   6
  -2  -3  12 5.94213 1.37435   2
  -2  -3  12 9.75459 2.11516   4
  -2  -3  12 9.31891 3.03130   6
   3  -2  12 9.26235 3.05059   6
   3  -3 -12 170.678 16.5817   2
   3  -3 -12 199.875 16.7836   5
   3   3 -12 202.125 16.9292   5
   3   3 -12 201.782 16.8003   2
   3  -3 -12 189.202 17.9389   1
  -3  -3  12 190.491 16.9610   2
  -3  -3  12 188.688 18.6859   1
  -3   3  12 171.425 18.0281   4
  -3  -3  12 195.188 18.6910   6
   3  -3  12 197.424 18.6002   6
  -3   3  12 179.829 19.6229   6
  -3  -3  12 201.469 17.5750   4
   4   3 -12 11.9888 2.63830   6
   4   3 -12 2.21690 1.94293   1
   3  -4 -12 4.24919 0.71867   5
   4   3 -12 5.47004 0.96546   2
   3  -4 -12 3.41965 1.37452   1
  -3   4 -12 1.30504 1.81844   1
  -4  -3  12 4.28272 2.24986   6
  -4  -3  12 3.95470 2.08865   1
  -3   4  12 2.97829 2.13263   4
  -4  -3  12 3.71183 1.43710   4
   3  -4  12 4.22593 2.23231   6
  -4  -3  12 2.23929 0.91171   2
   3  -4  12 1.98073 1.31536   4
  -3   4  12 2.56602 3.25045   6
   2  -4 -12 216.016 17.4955   5
  -2   4 -12 178.957 17.5876   2
   4   2 -12 208.502 17.7088   2
   2  -4 -12 209.598 18.7893   1
   4   2 -12 203.167 17.8634   5
   4   2 -12 169.498 19.7471   1
   2  -4  12 205.192 18.4628   4
  -4  -2  12 203.094 17.9178   2
  -4  -2  12 207.694 19.6684   6
  -2   4  12 193.159 20.6382   6
  -4  -2  12 212.396 18.5513   4
  -2   4  12 201.683 19.0840   4
   2  -4  12 221.817 19.6947   6
  -1   4 -12 5.19281 1.09643   2
   1  -4 -12 9.32988 2.06388   1
   4   1 -12 9.24074 1.41149   5
  -1   4 -12 4.69399 2.77037   1
   4   1 -12 9.06945 1.23833   2
   4   1 -12 10.2551 3.14191   1
  -1   4  12 12.5708 4.06109   6
   1  -4  12 6.24903 1.44794   2
   1  -4  12 12.6135 2.38281   4
   1  -4  12 8.02444 2.94987   6
  -4  -1  12 7.49864 3.34690   6
  -4  -1  12 11.6164 2.54922   4
  -1   4  12 8.76305 2.73803   4
  -4  -1  12 6.63379 1.44025   2
   4   0 -12 218.141 18.3204   5
   0  -4 -12 200.571 18.9393   1
   4   0 -12 214.294 20.1830   1
   4   0 -12 202.537 18.0975   2
   0   4 -12 208.789 18.1402   2
  -4   0  12 189.230 18.2965   2
   0  -4  12 208.926 20.0827   6
  -4   0  12 210.163 20.7953   6
   0  -4  12 203.018 18.3261   2
  -4   0  12 219.987 19.3189   4
   0  -4  12 211.048 18.8998   4
   1   4 -12 2.95183 2.46470   1
   4  -1 -12 8.36492 1.29842   5
   1   4 -12 8.72305 1.29660   5
   4  -1 -12 7.33306 2.33484   1
   4  -1 -12 6.82967 1.08005   2
  -4   1 -12 5.29422 2.75739   1
   1   4 -12 8.53490 1.21330   2
  -4   1  12 9.75664 4.02232   6
  -1  -4  12 8.66436 1.49374   2
  -4   1  12 12.3025 2.70874   4
  -4   1  12 3.18609 1.09408   2
  -1  -4  12 11.7019 2.29548   4
  -1  -4  12 11.0850 3.37740   6
   4  -2 -12 223.997 18.9725   5
   2   4 -12 202.435 18.9430   5
   4  -2 -12 212.359 18.7547   2
   2   4 -12 210.884 18.8498   2
   4  -2 -12 219.208 20.3275   1
  -4   2  12 221.095 21.8317   6
  -2  -4  12 207.396 19.4952   4
  -2  -4  12 216.325 20.6266   6
  -2  -4  12 219.281 19.0393   2
  -4   2  12 217.841 20.1085   4
   4  -2  12 223.189 20.4697   6
   3   4 -12 11.8973 2.71324   6
  -4   3 -12 0.77937 1.61233   1
   4  -3 -12 4.46884 1.58179   1
   3   4 -12 3.24565 2.10639   1
   3   4 -12 3.13312 0.75860   2
   4  -3 -12 5.58329 0.76850   2
   4  -3 -12 2.53542 0.71380   5
  -4   3  12 2.16722 0.98886   2
   4  -3  12 2.52203 1.35788   4
  -3  -4  12 3.31196 2.15801   6
  -4   3  12 3.92519 3.22627   6
  -4   3  12 2.58729 2.12988   4
  -3  -4  12 2.91650 1.31156   4
  -3  -4  12 2.54229 0.98332   2
   4  -3  12 3.87279 2.26636   6
   4  -4 -12 297.449 24.9834   5
   4  -4 -12 302.057 26.0602   1
   4  -4 -12 264.337 24.7709   2
   4   4 -12 281.892 24.9354   2
  -4  -4  12 327.748 27.1539   1
  -4   4  12 246.046 27.2628   6
  -4   4  12 279.301 26.2423   4
   4  -4  12 284.154 25.6159   4
  -4  -4  12 283.574 25.4769   4
  -4  -4  12 285.614 25.0680   2
   4  -4  12 288.828 26.5457   6
   4  -5 -12 6.90715 0.87986   5
   5   4 -12 6.83765 1.02401   2
   5   4 -12 14.6183 2.54402   6
   4  -5 -12 6.55336 1.64941   1
  -4   5  12 7.23020 2.30437   4
   4  -5  12 5.41788 1.57328   4
  -5  -4  12 4.27402 0.97885   2
  -5  -4  12 4.49683 1.34092   4
   4  -5  12 8.66195 2.53821   6
  -4   5  12 5.87240 2.98326   6
  -5  -4  12 4.07102 1.18619   5
  -5  -4  12 11.4244 2.78381   1
   4  -5  12 5.75586 2.26127   6
   5   3 -12 120.270 11.1417   2
   3  -5 -12 128.293 12.0712   1
   3  -5 -12 135.239 10.9451   5
  -3   5  12 127.423 12.6234   4
  -5  -3  12 119.646 11.6460   4
  -5  -3  12 120.352 11.2855   2
  -5  -3  12 126.017 11.6202   5
   3  -5  12 121.677 11.8240   4
  -3   5  12 128.298 14.0145   6
   3  -5  12 123.804 12.7030   6
  -2   5 -12 10.2863 1.21191   2
   5   2 -12 5.46846 2.25272   1
  -2   5 -12 0.99889 1.71506   1
   5   2 -12 20.3716 3.13731   6
   2  -5 -12 7.40160 1.77955   1
   5   2 -12 7.21550 1.09057   2
  -5  -2  12 11.1303 1.96155   4
  -2   5  12 7.35759 3.63227   6
  -5  -2  12 7.14110 2.61551   6
  -5  -2  12 11.4193 1.55881   2
  -2   5  12 11.3206 2.72709   4
  -5  -2  12 19.6081 3.86647   1
   2  -5  12 6.71234 1.77953   4
   2  -5  12 5.55228 2.38826   6
   2  -5  12 7.02479 1.31189   2
   5   1 -12 200.920 22.3204   1
  -1   5 -12 226.970 20.5537   2
   1  -5 -12 252.083 21.4995   1
   5   1 -12 239.062 20.5576   2
  -5  -1  12 247.330 22.4846   6
   1  -5  12 246.356 22.3521   6
   1  -5  12 245.916 21.3392   4
  -5  -1  12 270.175 21.5118   4
  -5  -1  12 227.242 20.7420   2
  -1   5  12 228.061 21.7181   4
   1  -5  12 228.018 20.7339   2
  -1   5  12 232.888 23.3453   6
   0   5 -12 -0.4557 0.45313   2
   0  -5 -12 0.26854 0.69228   1
   0   5 -12 1.46945 1.92333   1
   5   0 -12 -0.4330 1.02139   1
   5   0 -12 0.57671 0.58588   5
   5   0 -12 0.53981 0.45771   2
  -5   0  12 -2.0606 1.16847   4
   0  -5  12 -0.3367 1.59154   6
   0  -5  12 -0.3643 0.59922   2
  -5   0  12 0.20752 0.69426   2
   0   5  12 -1.7776 2.39947   6
  -5   0  12 1.35543 2.40447   6
   0  -5  12 0.84038 1.07256   4
   1   5 -12 199.534 20.9801   5
   5  -1 -12 241.788 20.9039   2
   5  -1 -12 268.682 21.1865   5
   1   5 -12 241.500 20.9700   2
   5  -1 -12 244.045 22.6079   1
  -5   1  12 235.996 21.1210   2
  -1  -5  12 243.246 22.5795   6
  -5   1  12 269.292 23.5974   6
  -1  -5  12 228.699 21.0710   2
  -1  -5  12 236.989 21.5967   4
  -5   1  12 259.402 22.1098   4
   5  -2 -12 11.0833 2.59603   1
   5  -2 -12 11.1756 1.33006   2
   2   5 -12 10.2252 1.37741   2
   2   5 -12 9.36910 1.36522   5
   5  -2 -12 8.71207 1.34343   5
  -5   2  12 3.27215 1.12919   2
  -2  -5  12 10.2589 2.06098   4
  -5   2  12 7.41788 2.44027   4
   5  -2  12 8.79132 2.73990   6
  -2  -5  12 9.21650 2.60718   6
  -5   2  12 10.8491 3.59724   6
  -2  -5  12 9.76706 1.50494   2
   5  -3 -12 136.099 11.2378   5
   5  -3 -12 136.375 12.3743   1
   3   5 -12 128.441 11.1358   2
   5  -3 -12 127.548 11.0439   2
   5  -3  12 115.599 12.3951   6
   5  -3  12 122.431 12.4945   6
  -5   3  12 111.286 11.2729   2
  -3  -5  12 117.294 11.2106   2
  -5   3  12 127.260 13.6332   6
  -3  -5  12 120.911 11.6061   4
  -5   3  12 125.813 12.2531   4
   4   5 -12 11.9003 2.38266   6
   5  -4 -12 5.43793 0.81560   2
   5  -4 -12 6.97300 0.99896   5
   5  -4 -12 6.57922 1.68257   1
   4   5 -12 5.70595 0.93057   2
  -4  -5  12 5.88115 1.28077   5
   5  -4  12 5.10965 1.44511   4
   5  -4  12 8.38387 2.51067   6
  -5   4  12 4.86009 1.83990   4
  -4  -5  12 4.16555 1.00133   2
  -5   4  12 8.02825 3.23680   6
  -4  -5  12 5.95043 1.43420   4
   5  -5 -12 128.902 11.2377   2
   5   5 -12 131.729 11.3370   2
   5  -5 -12 136.090 12.1434   1
  -5   5  12 118.927 13.0420   6
  -5   5  12 135.377 12.3769   4
  -5  -5  12 124.239 11.3630   2
   5  -5  12 120.348 12.5105   6
   5  -6 -12 0.07678 0.43028   1
   6   5 -12 0.64515 0.31738   2
  -5   6 -12 -0.0816 0.96164   1
   6   5 -12 1.07595 1.05975   6
  -5   6  12 -0.0286 1.40069   6
  -6  -5  12 0.08912 0.35497   2
   5  -6  12 -0.9907 1.06510   6
  -5   6  12 1.24315 1.15681   4
  -5   6  12 0.07517 0.51232   2
   4  -6 -12 74.7953 7.29851   1
   6   4 -12 71.1439 6.62544   2
  -4   6  12 74.1105 7.70209   4
  -6  -4  12 90.3886 8.43574   1
   4  -6  12 72.3746 7.84168   6
  -4   6  12 73.3685 8.65626   6
  -6  -4  12 67.3981 6.66276   2
  -3   6 -12 0.11320 1.08378   1
   3  -6 -12 0.70358 0.67481   1
   6   3 -12 0.85082 0.41864   2
   6   3 -12 3.42835 1.58163   6
  -6  -3  12 0.35258 0.54288   2
   3  -6  12 0.75712 0.90551   4
  -6  -3  12 0.63537 0.76101   5
   3  -6  12 0.31599 0.58542   2
  -3   6  12 0.50660 1.72799   4
  -3   6  12 0.44217 2.07749   6
   3  -6  12 0.48939 1.56737   6
  -6  -3  12 1.76209 1.55951   1
   2  -6 -12 119.290 11.0286   1
   6   2 -12 121.200 10.2666   2
  -2   6 -12 102.434 10.2127   2
   2  -6  12 118.166 11.7077   6
   2  -6  12 105.461 10.3680   2
  -2   6  12 118.452 13.0007   6
  -2   6  12 111.452 11.5105   4
  -6  -2  12 117.923 10.7389   4
   2  -6  12 121.566 10.9356   4
   2  -6  12 117.190 11.6970   6
  -6  -2  12 128.589 10.4443   2
  -1   6 -12 1.87716 0.66946   2
   6   1 -12 6.23100 1.90413   6
   6   1 -12 1.92710 0.58039   2
  -1   6 -12 0.90534 1.39453   1
   1  -6 -12 1.44802 0.85809   1
   1  -6  12 2.32048 0.77763   2
  -1   6  12 0.41776 2.24809   6
  -6  -1  12 0.90440 0.64335   2
   1  -6  12 2.24453 1.79985   6
  -6  -1  12 6.97017 2.60643   1
   1  -6  12 3.09548 1.18411   4
  -6  -1  12 3.22376 1.33959   4
   6   0 -12 272.217 27.0894   1
   0  -6 -12 274.241 26.1515   1
   0   6 -12 309.909 25.6234   2
   6   0 -12 312.853 25.5948   2
  -6   0  12 314.469 27.2475   6
   0  -6  12 299.290 25.7267   2
   0   6  12 231.351 27.2517   6
   0  -6  12 292.183 26.2152   4
   0  -6  12 304.165 27.0214   6
  -6   0  12 302.893 25.7557   2
  -6   0  12 333.335 26.4310   4
   1   6 -12 0.58894 1.42013   1
   6  -1 -12 1.72126 1.25276   1
   6  -1 -12 2.06773 0.56306   2
   6  -1 -12 1.21278 0.64538   5
   1   6 -12 2.62710 0.68429   2
   1   6 -12 5.50792 1.70914   4
  -6   1  12 2.87582 2.23585   6
  -6   1  12 1.98763 0.80839   2
  -1  -6  12 2.15984 1.16452   4
  -1  -6  12 1.93555 0.74659   2
  -1  -6  12 0.41468 1.60418   6
  -6   1  12 0.66018 1.24305   4
   6  -2 -12 129.127 12.2283   1
   6  -2 -12 124.994 11.0969   5
   2   6 -12 118.356 10.9578   2
   6  -2 -12 133.679 10.9355   2
  -2  -6  12 108.321 11.3640   4
  -6   2  12 137.084 11.9130   4
  -6   2  12 124.938 12.8693   6
  -2  -6  12 114.885 11.0193   2
   6  -3 -12 1.40205 1.04679   1
   6  -3 -12 1.27970 0.61362   5
   3   6 -12 0.50104 0.43177   2
  -6   3 -12 0.41229 1.37130   1
   6  -3 -12 1.78312 0.52226   2
   3   6 -12 3.04976 1.57462   6
  -6   3  12 0.38215 1.22613   4
  -6   3  12 0.04886 0.60190   2
  -6   3  12 0.60397 1.96619   6
   6  -3  12 2.08029 1.59214   6
  -3  -6  12 1.42700 0.61997   2
  -3  -6  12 2.56623 1.02320   4
   6  -4 -12 71.6386 6.39646   2
   6  -4 -12 77.1358 7.37200   1
   4   6 -12 67.5525 6.47350   2
   6  -4  12 67.9074 7.58692   6
  -6   4  12 76.4393 7.35399   4
  -6   4  12 71.5116 8.08747   6
  -4  -6  12 73.7325 6.53641   2
   5   6 -12 0.13548 0.28746   2
   6  -5 -12 0.52593 0.26763   2
   5   6 -12 0.26821 1.02142   6
   6  -5 -12 0.12080 0.52447   1
  -6   5 -12 0.08277 0.90979   1
  -6   5  12 -0.3704 0.40332   2
  -6   5  12 -0.1354 0.97510   4
   6  -5  12 -0.0582 1.12571   6
  -5  -6  12 0.04644 0.34961   2
  -6   5  12 0.45058 1.45171   6
   6  -6 -12 106.491 9.32524   1
   6   6 -12 100.275 8.80472   2
   6  -6  12 98.2970 9.53035   6
  -6   6  12 105.039 9.28732   4
  -6   6  12 89.1630 9.62453   6
   7   5 -12 43.6560 3.92531   2
   5  -7 -12 45.4375 4.34461   1
   5  -7  12 39.9006 4.55912   6
  -5   7  12 41.1267 4.95682   6
  -5   7  12 47.8890 4.56806   4
  -4   7 -12 -0.4023 0.80565   1
   7   4 -12 1.55545 0.39806   2
   7   4 -12 4.14316 1.23723   6
   4  -7 -12 1.40556 0.67471   1
  -4   7  12 1.03962 1.50425   6
  -7  -4  12 1.11471 0.46740   2
  -7  -4  12 1.77172 1.24747   1
   4  -7  12 1.67454 0.48432   2
   4  -7  12 2.99443 1.33139   6
  -4   7  12 0.46834 1.08738   4
   3  -7 -12 21.6077 2.60977   1
   7   3 -12 19.2745 2.09642   2
  -3   7  12 20.8902 4.02613   6
   3  -7  12 25.0915 3.52552   6
  -7  -3  12 21.7115 2.18350   2
  -3   7  12 31.0186 3.69559   4
   3  -7  12 22.3645 2.24876   2
   7   2 -12 2.49778 0.53782   2
  -2   7 -12 2.78072 0.62448   2
   7   2 -12 9.78900 1.97151   6
   2  -7 -12 3.05174 0.90649   1
  -2   7 -12 1.15500 1.20413   1
  -7  -2  12 2.73211 0.67570   2
  -2   7  12 2.74854 2.24209   6
   2  -7  12 2.36113 0.70901   2
   2  -7  12 1.47426 0.93441   4
  -2   7  12 4.90802 1.81481   4
  -7  -2  12 6.25764 2.09612   1
   2  -7  12 2.27158 1.61524   6
  -1   7 -12 94.5465 8.71893   2
   1  -7 -12 98.3064 9.23014   1
   7   1 -12 107.532 8.72753   2
   1  -7  12 98.7440 9.21636   4
  -1   7  12 95.4374 10.6437   6
   1  -7  12 88.1608 9.74593   6
   1  -7  12 97.7506 8.81977   2
  -7  -1  12 100.614 8.81571   2
   0   7 -12 0.07189 0.38300   2
   0   7 -12 -0.4157 0.93791   1
   7   0 -12 -0.0349 0.32771   2
   0  -7 -12 0.40096 0.55523   1
  -7   0  12 0.16477 0.98563   4
   0  -7  12 -0.3875 0.78158   4
   0  -7  12 1.92489 1.64505   6
  -7   0  12 -0.2370 1.21394   1
   0   7  12 0.06296 1.72657   6
  -7   0  12 -0.1540 0.42382   2
   0  -7  12 -0.3861 0.45306   2
   7  -1 -12 108.003 8.92089   2
   1   7 -12 96.9911 8.93650   2
  -1  -7  12 95.4135 8.98192   2
  -1  -7  12 93.2406 9.31785   4
  -7   1  12 104.154 9.46889   4
  -7   1  12 104.399 9.04132   2
   7  -2 -12 3.71637 0.65403   2
   2   7 -12 5.83230 1.62851   4
   2   7 -12 2.92501 0.63741   2
  -7   2  12 5.04951 1.36359   4
  -2  -7  12 1.91807 0.64590   2
  -2  -7  12 3.65498 1.07822   4
  -7   2  12 4.17937 0.84091   2
   7  -3 -12 22.4141 2.15435   2
   3   7 -12 20.1124 2.19863   2
   3   7 -12 39.4312 5.41555   6
   7  -3  12 21.4985 3.30688   6
  -3  -7  12 22.9123 2.25812   2
  -7   3  12 22.0427 2.86600   4
  -7   3  12 22.9480 2.32835   2
   4   7 -12 1.53687 1.14615   6
  -7   4 -12 -0.1084 0.90430   1
   4   7 -12 1.89126 0.41440   2
   4   7 -12 2.99375 1.16339   4
   7  -4 -12 2.26749 0.93726   1
   7  -4 -12 1.89467 0.38563   2
  -4  -7  12 1.21931 0.42300   2
   7  -4  12 3.04151 1.25167   6
  -7   4  12 0.18676 0.38536   2
  -7   4  12 2.17021 0.97293   4
   5   7 -12 42.0879 3.88134   2
  -7   5  12 49.7107 4.32403   4
   7  -5  12 40.0707 4.52400   6
   4  -8 -12 30.4191 3.08089   1
  -4   8  12 30.7487 3.75483   6
   8   3 -12 5.95637 1.27576   6
  -3   8 -12 -0.0279 0.77692   1
   3  -8 -12 1.99691 0.65923   1
   8   3 -12 2.64012 0.44898   2
  -8  -3  12 4.71829 1.40403   1
   3  -8  12 2.35336 1.09101   6
  -3   8  12 2.40607 1.08944   4
  -3   8  12 3.67101 1.62222   6
   3  -8  12 2.35649 0.49078   2
   8   2 -12 44.0580 3.66469   2
  -2   8 -12 33.9828 3.60734   2
   2  -8 -12 42.0113 4.06601   1
  -2   8  12 42.1146 4.33489   4
  -8  -2  12 44.4921 3.66671   2
   2  -8  12 39.5257 3.71769   2
   2  -8  12 33.6202 4.30863   6
  -2   8  12 46.6027 5.76444   6
   8   1 -12 3.94729 0.65370   2
   1  -8 -12 4.69195 1.01064   1
  -1   8 -12 4.13538 0.71559   2
  -8  -1  12 11.9168 2.45609   1
  -1   8  12 3.67237 1.83669   6
   1  -8  12 3.99895 0.70612   2
  -8  -1  12 4.49565 0.73422   2
   8   0 -12 63.7993 5.38529   2
   0   8 -12 60.1211 5.41977   2
  -8   0  12 61.5295 5.44140   2
   0  -8  12 54.9349 5.42604   2
   8  -1 -12 4.07409 0.62807   2
   1   8 -12 4.13740 0.69700   2
   1   8 -12 3.45426 1.17521   4
  -8   1  12 5.62463 0.78601   2
  -1  -8  12 4.91982 0.75532   2
   8  -2 -12 47.2423 3.98528   2
   2   8 -12 44.0661 4.01728   2
  -8   2  12 44.4214 4.05354   2
  -2  -8  12 40.7513 3.99924   2
   3   8 -12 1.81238 0.40617   2
   8  -3 -12 2.42175 0.39611   2
   3   8 -12 3.42979 1.01512   4
  -3  -8  12 1.99273 0.42538   2
  -8   3  12 2.33405 0.49176   2
  -3  -8  12 1.74865 1.27478   1
  -8   4  12 29.6097 2.90312   2
   0   0 -13 -0.6102 1.41561   1
   0   0 -13 -0.3523 0.25720   5
   0   0  13 -0.4195 2.20190   6
   0   0  13 0.70666 1.34710   4
   0  -1 -13 -0.0146 1.13531   1
   1   0 -13 0.25071 0.44162   2
   1   0 -13 0.36667 1.43238   1
   0   1 -13 -0.4672 0.30411   5
  -1   0 -13 -0.2956 1.52992   1
   0   1 -13 -0.1619 0.71532   2
   1   0 -13 0.42007 0.41120   5
   0   1 -13 0.15203 1.78794   1
   0  -1  13 -0.4794 1.14300   4
  -1   0  13 -2.6238 1.17032   4
   1   0  13 1.14800 1.42039   4
   0  -1  13 0.25720 2.10500   6
   1   0  13 1.84009 2.43406   6
  -1   0  13 0.24362 2.43135   6
   0   1  13 -1.3511 1.36193   4
   0   1  13 -2.2805 1.81480   6
   1  -1 -13 0.12017 0.33637   5
   1   1 -13 -0.4669 0.31005   5
  -1   1 -13 1.30048 2.02110   1
   1   1 -13 0.31192 1.71844   1
   1   1 -13 0.85146 0.49096   2
   1  -1 -13 -0.1840 1.08525   1
  -1  -1 -13 1.01133 1.49422   1
  -1   1  13 -1.3322 2.05349   6
  -1  -1  13 2.57526 2.39325   6
  -1   1  13 1.49413 1.57358   4
   1  -1  13 1.02538 1.30255   4
  -1  -1  13 -0.0943 1.26720   4
   1  -1  13 0.52057 2.24687   6
   1   1  13 -1.0996 2.16398   6
   2   1 -13 1.31448 0.54697   5
   2   1 -13 1.01312 1.56554   1
  -1   2 -13 0.84137 1.92739   1
   1  -2 -13 1.06513 0.29013   5
   2   1 -13 0.77511 0.51078   2
  -2  -1 -13 0.53276 1.73662   1
   1  -2 -13 0.88479 1.19487   1
  -2  -1  13 0.97018 0.89852   2
  -2  -1  13 1.66124 1.38732   4
  -2  -1  13 -0.9169 2.34271   6
  -1   2  13 0.89775 2.49336   6
   1  -2  13 0.40683 2.05004   6
  -1   2  13 1.60739 1.56476   4
   1  -2  13 0.40356 1.22843   4
   2   0 -13 -0.4156 0.40174   2
  -2   0 -13 -0.7960 1.61340   1
   0   2 -13 0.23817 0.42875   5
   0   2 -13 -1.9245 1.55788   1
   0   2 -13 0.19768 0.48982   2
   2   0 -13 -0.7574 0.32879   5
   0  -2 -13 -0.3029 0.98260   1
   2   0 -13 -0.1773 1.32203   1
   2   0  13 1.22602 1.98941   6
  -2   0  13 0.40169 1.35476   4
  -2   0  13 -0.3054 2.36686   6
   0  -2  13 0.48739 1.19104   4
   0   2  13 -0.7014 1.47057   4
   0  -2  13 -0.7337 1.91459   6
   0   2  13 -1.0377 1.99643   6
   2  -1 -13 0.23520 1.25444   1
  -2   1 -13 1.29770 2.09778   1
   2  -1 -13 1.07555 0.46999   2
  -1  -2 -13 0.69815 1.29593   1
   1   2 -13 1.59102 2.31682   1
   1   2 -13 0.80158 0.54024   2
   1   2 -13 1.71088 0.60349   5
   2  -1 -13 1.22586 0.48944   5
  -2   1  13 0.00617 1.53584   4
   2  -1  13 0.22753 1.25929   4
  -1  -2  13 0.90087 1.36912   4
  -1  -2  13 2.46807 2.49931   6
  -1  -2  13 1.86745 0.96458   2
   1   2  13 2.82431 2.36433   6
  -2   1  13 1.60147 2.67270   6
   2  -1  13 2.13925 2.22537   6
   2  -2 -13 0.28798 1.07362   1
   2   2 -13 -0.1109 1.57549   1
   2  -2 -13 0.26904 0.36064   5
   2   2 -13 0.26641 0.48022   2
  -2   2 -13 -0.7245 1.69360   1
   2   2 -13 0.44206 0.48508   5
  -2  -2  13 0.17225 0.72405   2
  -2   2  13 -0.5784 2.64057   6
  -2  -2  13 -0.0168 1.22222   4
  -2  -2  13 1.75441 2.48710   6
  -2   2  13 1.39828 1.57753   4
   2  -2  13 0.88112 1.94892   6
   2  -2  13 -0.4345 1.13883   4
   3   2 -13 -0.3066 0.46371   2
   2  -3 -13 0.77846 0.96100   1
   2  -3 -13 0.64562 0.30201   5
  -2   3 -13 0.44288 1.67382   1
   3   2 -13 0.34492 1.49811   1
   3   2 -13 0.69181 0.51659   5
   2  -3  13 -0.1216 1.89529   6
  -3  -2  13 1.58229 2.31955   6
  -2   3  13 1.87280 2.45527   6
  -3  -2  13 0.06424 0.65586   2
  -3  -2  13 1.74001 1.32307   4
   2  -3  13 0.53441 1.17535   4
  -2   3  13 0.59148 1.58414   4
   3   1 -13 0.81946 1.67219   1
   3   1 -13 0.21486 0.45669   5
   3   1 -13 0.10859 0.44989   2
  -1   3 -13 0.11575 0.47246   2
  -1   3 -13 -0.1774 1.75454   1
   1  -3 -13 -0.0044 0.86727   1
   1  -3  13 0.41049 1.22940   4
  -3  -1  13 -0.6075 1.27746   4
  -1   3  13 1.37231 2.32049   6
  -3  -1  13 -0.4161 2.45218   6
   1  -3  13 0.40036 1.96055   6
  -3  -1  13 0.08684 0.69572   2
  -1   3  13 2.43311 1.66435   4
   3   0 -13 -0.5853 1.12452   1
   3   0 -13 -0.2023 0.39036   2
   3   0 -13 -0.6146 0.37796   5
   0   3 -13 1.04441 2.02178   1
   0  -3 -13 0.01021 0.86104   1
   0   3 -13 -0.1241 0.49022   2
  -3   0  13 0.05215 1.46198   4
   0  -3  13 0.91000 1.96200   6
   0  -3  13 -0.7142 0.68938   2
  -3   0  13 -0.0740 0.69808   2
   0  -3  13 -0.2208 1.17288   4
  -3   0  13 2.31799 3.04629   6
   0   3  13 0.12950 2.02837   6
   1   3 -13 0.31567 0.48809   5
  -3   1 -13 -1.6812 1.46823   1
   1   3 -13 0.37275 1.74067   1
   3  -1 -13 0.50420 0.47093   5
   1   3 -13 -0.0123 0.46618   2
   3  -1 -13 -0.2526 0.38152   2
   3  -1 -13 -0.0301 1.07799   1
  -3   1  13 0.03021 1.47381   4
  -1  -3  13 0.07609 1.13028   4
  -3   1  13 1.57533 2.76260   6
  -1  -3  13 -0.3618 0.68624   2
  -3   1  13 0.42977 0.69878   2
   3  -1  13 0.45086 1.83650   6
  -1  -3  13 -0.8871 2.00314   6
   3  -2 -13 0.20512 0.37309   2
   2   3 -13 0.14648 1.54911   1
   2   3 -13 0.10406 0.49946   5
   3  -2 -13 0.94417 0.47620   5
   2   3 -13 0.30524 0.48455   2
  -3   2 -13 0.15957 1.58967   1
   3  -2 -13 1.32604 1.32016   1
  -2  -3  13 0.87558 1.38036   4
  -2  -3  13 0.40309 0.74303   2
   3  -2  13 -0.3985 1.74885   6
   3  -2  13 1.04494 1.20342   4
  -3   2  13 1.12397 1.51368   4
  -3   2  13 0.03482 2.65895   6
  -2  -3  13 1.62964 2.14449   6
   3  -3 -13 0.29013 0.81167   1
   3   3 -13 -0.4887 0.46051   5
   3   3 -13 -0.2749 0.43880   2
   3  -3 -13 -0.0488 0.33561   5
   3   3 -13 0.02042 1.46527   1
  -3   3 -13 -0.0748 1.56220   1
  -3  -3  13 -0.0603 0.66176   2
   3  -3  13 1.95875 1.24301   4
  -3   3  13 0.68483 2.57469   6
  -3  -3  13 -0.3027 1.10972   4
  -3  -3  13 1.48939 2.00619   6
  -3   3  13 -0.6521 1.45122   4
   3  -3  13 -0.8856 1.55766   6
   4   3 -13 1.12684 0.50206   2
  -3   4 -13 -0.0490 1.35661   1
   4   3 -13 0.47861 0.67349   5
   3  -4 -13 0.93759 0.86234   1
   3  -4 -13 0.77050 0.30343   5
   4   3 -13 1.40886 1.54234   1
   3  -4  13 -0.4801 1.44047   6
  -3   4  13 -0.2907 1.64924   4
  -4  -3  13 -0.9487 0.93753   4
  -4  -3  13 0.11563 0.62497   2
  -4  -3  13 1.40230 1.73636   6
   3  -4  13 0.68120 1.04820   4
  -3   4  13 0.65921 2.34122   6
   4   2 -13 0.58460 1.42716   1
   4   2 -13 0.19325 0.46112   5
   2  -4 -13 -0.1385 0.66773   1
  -2   4 -13 -0.7442 1.25751   1
   4   2 -13 -0.3086 0.40628   2
   2  -4  13 1.28118 1.12462   4
  -4  -2  13 -0.9199 0.99961   4
  -4  -2  13 1.29343 1.98263   6
  -4  -2  13 -0.4823 0.58096   2
  -2   4  13 -0.4564 1.59722   4
   2  -4  13 1.54967 1.82094   6
  -2   4  13 3.70448 2.78526   6
   4   1 -13 0.74191 0.52865   5
  -1   4 -13 1.12754 0.52781   2
   1  -4 -13 0.88202 0.89161   1
  -1   4 -13 0.70040 1.71704   1
   4   1 -13 1.52388 1.63127   1
   4   1 -13 0.46805 0.49243   2
   1  -4  13 0.78367 1.76794   6
  -4  -1  13 3.18121 2.40909   6
   1  -4  13 0.24105 0.73851   2
  -4  -1  13 0.83609 0.71778   2
   1  -4  13 0.40134 1.17190   4
  -1   4  13 1.65389 2.44869   6
  -4  -1  13 0.03878 1.30441   4
  -1   4  13 -0.3813 1.63232   4
   4   0 -13 0.14891 0.47449   5
   4   0 -13 0.32596 0.43397   2
   0   4 -13 0.47578 0.51245   2
   0   4 -13 0.12679 1.53189   1
   4   0 -13 0.45405 1.34016   1
   0  -4 -13 0.32826 0.73356   1
   0  -4  13 4.08384 2.25474   6
  -4   0  13 0.39714 2.28807   6
  -4   0  13 -0.5791 0.53730   2
   0  -4  13 -0.8062 0.64410   2
   0   4  13 2.65124 2.25991   6
  -4   0  13 0.04549 1.37682   4
   0  -4  13 0.34008 1.11633   4
   1   4 -13 0.56481 0.53127   2
   1   4 -13 0.57133 0.47384   5
   4  -1 -13 1.32703 0.51812   2
   4  -1 -13 0.64652 0.50642   5
   4  -1 -13 0.56966 1.13725   1
   1   4 -13 -0.1681 1.48124   1
  -4   1 -13 1.26140 1.84076   1
  -4   1  13 1.11329 1.52886   4
  -4   1  13 0.71733 2.63478   6
  -1  -4  13 1.10657 0.78038   2
  -1  -4  13 1.61501 2.06820   6
  -4   1  13 1.00485 0.67431   2
  -1  -4  13 -0.3347 1.14104   4
   4  -2 -13 -0.5851 0.77854   1
   2   4 -13 -0.5538 1.35683   1
   4  -2 -13 -0.3383 0.38622   5
   2   4 -13 -0.8691 0.41214   2
   4  -2 -13 0.32051 0.43877   2
   2   4 -13 0.45267 0.49255   5
  -4   2 -13 -0.1600 1.41191   1
  -2  -4  13 -0.7639 1.69882   6
  -2  -4  13 0.12130 0.61268   2
  -2  -4  13 -0.6202 1.01545   4
   4  -2  13 -1.2145 1.32918   6
  -4   2  13 0.37284 0.64253   2
  -4   2  13 4.17462 2.79783   6
  -4   2  13 -0.5920 1.29953   4
   4  -3 -13 0.36378 0.39933   2
   4  -3 -13 1.30618 0.47234   5
   4  -3 -13 0.33983 0.90243   1
   3   4 -13 -0.9263 1.04451   1
   3   4 -13 0.86552 0.56949   5
  -4   3 -13 -1.4460 1.12353   1
   3   4 -13 0.59590 0.45764   2
  -3  -4  13 0.37725 0.61965   2
  -3  -4  13 -0.5058 0.92954   4
  -3  -4  13 1.22776 1.73665   6
  -4   3  13 0.50704 2.49788   6
  -4   3  13 0.65943 0.74358   2
  -4   3  13 0.80478 1.54624   4
   4  -3  13 0.58787 1.57231   6
   4  -3  13 2.33551 1.16330   4
   4   4 -13 -0.3003 0.35806   2
  -4   4 -13 -0.4130 1.15213   1
   4  -4 -13 0.13975 0.29915   5
   4  -4 -13 0.14126 0.67754   1
  -4   4  13 1.97456 1.51370   4
   4  -4  13 0.10806 0.98858   4
  -4  -4  13 -0.6395 0.51277   2
  -4  -4  13 -0.1757 0.84978   4
   4  -4  13 0.70841 1.49923   6
  -4   4  13 -1.1892 2.06633   6
   4  -5 -13 1.07774 0.75343   1
   5   4 -13 0.01376 0.35791   2
  -4   5 -13 -0.6791 0.97471   1
   4  -5  13 0.62030 0.88365   4
   4  -5  13 -1.4095 1.20654   6
  -5  -4  13 -0.2355 0.92659   4
  -5  -4  13 0.55370 0.53368   2
  -4   5  13 0.61897 1.40976   4
  -4   5  13 -0.0342 1.95389   6
   5   3 -13 0.18785 0.40192   2
   3  -5 -13 0.17592 0.67144   1
  -3   5 -13 0.10058 1.19286   1
   3  -5  13 -0.7922 0.81230   4
   3  -5  13 0.01117 1.43495   6
  -5  -3  13 0.57390 0.56258   2
  -3   5  13 -0.1428 2.00758   6
  -5  -3  13 0.17880 0.93987   4
   3  -5  13 -0.7013 1.32872   6
  -3   5  13 -2.0560 1.53564   4
  -5  -3  13 0.17822 1.11496   1
  -2   5 -13 0.92468 0.64542   2
   5   2 -13 1.86325 0.51073   2
  -2   5 -13 -0.0607 1.36835   1
   2  -5 -13 0.97073 0.84190   1
   5   2 -13 0.42619 1.21852   1
  -2   5  13 3.19579 2.76849   6
  -5  -2  13 0.78445 1.81844   6
   2  -5  13 0.59995 1.55836   6
   2  -5  13 1.86546 1.04135   4
   2  -5  13 1.34750 0.73464   2
  -5  -2  13 0.93655 0.66154   2
  -5  -2  13 1.27308 1.05445   4
  -2   5  13 0.98216 1.77590   4
  -1   5 -13 0.03882 0.46414   2
   1  -5 -13 -0.0880 0.59946   1
   5   1 -13 -0.1434 1.15129   1
  -1   5 -13 -0.5305 1.24986   1
   5   1 -13 0.43357 0.40458   2
   5   1 -13 -0.3559 0.44716   5
   1  -5  13 -0.2552 1.50280   6
  -5  -1  13 0.23829 1.13290   4
   1  -5  13 -1.8040 0.92929   4
  -5  -1  13 1.25577 0.71517   2
  -5  -1  13 -0.4126 1.76489   6
  -1   5  13 0.00179 2.05123   6
   1  -5  13 -0.4190 0.63322   2
   5   0 -13 -0.3803 0.47246   5
   5   0 -13 -0.0919 0.38082   2
   5   0 -13 -1.0776 1.01468   1
   0   5 -13 -0.1710 1.22806   1
   0  -5 -13 -0.0606 0.62503   1
   0   5 -13 0.38706 0.48450   2
   0   5  13 -0.9774 1.85664   6
  -5   0  13 -0.5712 1.12219   4
   0  -5  13 -1.0535 0.90847   4
   0  -5  13 1.60877 0.72590   2
  -5   0  13 0.57234 2.09806   6
  -5   0  13 0.77237 0.62825   2
   0  -5  13 1.51738 1.71128   6
   1   5 -13 0.45754 0.47160   2
   1   5 -13 -0.4572 1.23976   1
   5  -1 -13 0.22319 0.44855   5
   5  -1 -13 -0.3372 0.99294   1
   5  -1 -13 0.03299 0.40380   2
  -1  -5  13 -0.4524 0.58639   2
  -5   1  13 -0.6019 0.50607   2
  -5   1  13 1.29814 1.43805   4
  -1  -5  13 0.49470 1.00302   4
  -5   1  13 -0.2955 2.13788   6
  -1  -5  13 0.06911 1.64502   6
   2   5 -13 0.17156 1.24307   1
   2   5 -13 2.53152 1.50323   4
   5  -2 -13 1.30118 1.17526   1
  -5   2 -13 0.14493 1.49425   1
   2   5 -13 0.56999 0.51569   2
   2   5 -13 1.43936 0.55031   5
   5  -2 -13 2.27423 0.59704   5
   5  -2 -13 0.40811 0.41979   2
   5  -2  13 -0.1494 1.44931   6
  -5   2  13 -1.3644 1.99468   6
  -5   2  13 1.46068 0.71000   2
  -2  -5  13 -0.5991 0.55218   2
  -2  -5  13 2.38123 1.74262   6
  -5   2  13 2.36182 1.59778   4
  -2  -5  13 2.02796 1.10735   4
   3   5 -13 -0.1007 1.39372   1
   5  -3 -13 0.03878 0.33005   2
   5  -3 -13 0.28324 0.77782   1
   5  -3 -13 0.03080 0.35699   5
   3   5 -13 -0.1353 0.40050   2
  -5   3 -13 0.34705 1.29344   1
   5  -3  13 1.14714 1.48178   6
  -3  -5  13 0.42491 0.59153   2
  -5   3  13 -0.7806 0.53382   2
  -5   3  13 -1.5006 1.79777   6
   5  -3  13 0.13729 1.23222   6
  -5   3  13 1.45981 1.39682   4
  -3  -5  13 0.14984 0.85027   4
   5  -4 -13 0.72479 0.82144   1
  -5   4 -13 0.26299 1.12244   1
   5  -4 -13 0.13240 0.30337   2
   4   5 -13 0.99340 0.43770   2
  -4  -5  13 0.18035 0.52111   2
   5  -4  13 1.04810 1.38690   6
  -5   4  13 1.16746 1.82913   6
  -5   4  13 -0.1597 0.53578   2
  -5   4  13 0.92085 1.21911   4
  -4  -5  13 -0.2839 0.81588   4
   5  -5 -13 0.29016 0.56446   1
   5   5 -13 0.04973 0.27687   2
  -5   5 -13 -0.2447 0.87918   1
  -5   5  13 0.96592 1.02855   4
   5  -5  13 1.86645 1.22814   6
  -5   5  13 0.25629 1.54639   6
  -5   5  13 0.13023 0.50599   2
  -5  -5  13 -0.0037 0.37897   2
   6   5 -13 -0.4098 0.24254   2
  -5   6 -13 0.00662 0.82292   1
   5  -6 -13 -0.1744 0.39951   1
  -6  -5  13 0.08698 0.32846   2
  -5   6  13 1.14050 0.87935   4
  -5   6  13 -0.4199 0.64747   2
  -5   6  13 -0.3099 1.15217   6
   5  -6  13 0.48414 1.04723   6
   6   4 -13 0.00692 1.06218   6
  -4   6 -13 -0.3332 0.85190   1
   4  -6 -13 -0.0042 0.47681   1
   6   4 -13 -0.2243 0.25549   2
  -6  -4  13 -0.3950 0.38274   2
  -4   6  13 -1.3240 1.04310   4
  -4   6  13 0.50359 1.47145   6
   4  -6  13 0.54233 1.24716   6
  -3   6 -13 0.16241 1.02579   1
   3  -6 -13 0.05339 0.52985   1
   6   3 -13 0.01449 0.32075   2
  -6  -3  13 0.94897 1.11735   1
  -3   6  13 -3.6259 1.03508   4
   3  -6  13 0.35214 0.85305   4
  -3   6  13 0.83142 1.93875   6
  -6  -3  13 -0.8944 0.36849   2
   3  -6  13 -0.1239 0.45955   2
   3  -6  13 -0.3065 1.26714   6
   6   2 -13 0.24417 0.34545   2
   2  -6 -13 -0.2662 0.49321   1
  -2   6 -13 -0.3785 0.36099   2
  -2   6 -13 -0.4257 0.94058   1
   2  -6  13 0.68925 0.52476   2
   2  -6  13 -0.6183 1.34210   6
  -2   6  13 -1.6371 1.37974   4
  -6  -2  13 0.05947 0.81806   4
   2  -6  13 0.61563 1.43138   6
  -2   6  13 -0.0465 2.02273   6
  -6  -2  13 0.11841 0.48695   2
  -6  -2  13 0.53321 1.18379   1
   2  -6  13 -0.3947 0.76625   4
  -1   6 -13 0.02023 0.40178   2
  -1   6 -13 -0.4918 1.00342   1
   1  -6 -13 0.72799 0.68291   1
[truncated: 49,511 more chars]
